# Supplementary material for: A High-Throughput Method to Analyze the Interaction Proteins With p22 Protein of African Swine Fever Virus In Vitro
Source: Front Vet Sci. 2021 Sep 6;8:719859. doi: 10.3389/fvets.2021.719859 (PMC8450437; doi:10.3389/fvets.2021.719859)
Supplement: Supplementary Table 1 — GO terms and corresponding proteins. [file Table_1.XLSX]

## Sheet: BP
Level	GO_ID	Term	Type	Seqs_Num	Sequences
1	GO:0008150	biological_process	Biological Process	359	A8K4Z4,B4DHZ2,B2R5U7,B4DEB2,Q86V81,P62750,P30050,Q02878,A8K800,Q15050,P46087,P42677,A0A0B4J2E5,Q96GA3,Q08211,Q9Y5B9,A0A087X270,Q08945,H7C5P4,P24941,P23396,P05141,O75531,P11388,B0AZQ4,P23258,P68371,P16104,P62753,O14578,P22626,P09874,O75367,P06733,P16403,Q9P0M6,P10599,P45973,P35251,Q9H0A0,P05387,P32969,P08708,P63173,P60866,P62269,P62280,P18124,P36578,Q9Y3U8,P38919,P61326,P62424,P42766,P62851,P83881…
2	GO:0000003	reproduction	Biological Process	14	P35579,P23258,P11388,P11021,P62753,P30048,Q96SB3,P16104,Q08J23,P55769,P17987,P61160,P78527,P24941
2	GO:0008152	metabolic process	Biological Process	275	B4DEB2,Q86V81,Q08211,Q9Y5B9,A0A087X270,Q08945,H7C5P4,P24941,P22626,P09874,O75367,P06733,P16403,Q9P0M6,P10599,P45973,P35251,Q9H0A0,P05387,P32969,P08708,P23396,P62750,P63173,P30050,P60866,P42677,P62269,P62280,P18124,P36578,Q02878,Q9Y3U8,P38919,P61326,P62424,P42766,P62851,P83881,P26373,P62753,P49207,P25398,Q9Y5S9,Q9UMS4,Q6P2Q9,O94906,P62314,O75533,P38159,O00422,J3QL05,Q13243,P62318,P62306,E9PMI6,I3L…
2	GO:0001906	cell killing	Biological Process	2	P68371,P04406
2	GO:0002376	immune system process	Biological Process	33	P35579,A0A3G2LMJ8,P12956,P13010,P78527,Q15050,P13639,P11388,P62753,Q5U071,Q9NR30,P31151,B4DY09,P68371,P61026,P09496,Q00610,P23396,P30048,P12814,P09874,P08708,O15144,P61160,O15143,P68104,P14618,Q86YZ3,Q08211,Q5HYL6,Q12906,P04406,O75369
2	GO:0040007	growth	Biological Process	6	Q96SB3,Q9UMS4,P06733,P14618,Q16643,P78527
2	GO:0007610	behavior	Biological Process	5	P18085,Q96SB3,P38919,P61160,Q7Z406
2	GO:0008283	cell proliferation	Biological Process	26	Q9UMS4,P25705,P62753,P05141,P30048,O60884,P46087,P24941,P17096,P13639,Q9NZI8,P23396,Q96SB3,P61026,Q08211,P78527,P50402,P12956,P13010,Q16643,Q5U071,P35580,P62750,P42677,Q9GZL7,Q9NWT1
2	GO:0009987	cellular process	Biological Process	337	B4DEB2,Q86V81,P62750,P30050,Q02878,A8K800,Q15050,P46087,P42677,A0A0B4J2E5,Q08211,Q9Y5B9,A0A087X270,Q08945,H7C5P4,P24941,P23396,P05141,O75531,P11388,B0AZQ4,P23258,P68371,P16104,P62753,O14578,P22626,P09874,O75367,P06733,P16403,Q9P0M6,P10599,P45973,P35251,Q9H0A0,P05387,P32969,P08708,P63173,P60866,P62269,P62280,P18124,P36578,Q9Y3U8,P38919,P61326,P62424,P42766,P62851,P83881,P26373,P49207,P25398,Q9Y5S9…
2	GO:0022414	reproductive process	Biological Process	14	P35579,P23258,P11388,P11021,P62753,P30048,Q96SB3,P16104,Q08J23,P55769,P17987,P61160,P78527,P24941
2	GO:0022610	biological adhesion	Biological Process	11	P35580,P16615,A0A024R1X8,P62330,Q68DY8,P23396,P12814,P35579,P19105,O43707,O15144
2	GO:0023052	signaling	Biological Process	48	B7ZAY2,Q15185,P63104,O14654,O75369,B2RE34,O14578,P24941,P11021,P16615,Q9Y5M8,P18085,P09874,Q9GZL7,P35579,Q9BRL5,Q96SB3,P05141,P12236,P24928,Q8TDG2,P78527,Q9NWT1,O14958,Q7Z406,P23396,Q16643,P62753,P61026,O43707,P62330,P22626,P17987,O15144,P61160,O15143,Q9NR30,P10599,Q00610,P50402,P31151,Q9UMS4,P38919,Q9Y5B9,Q15050,Q08945,P46087,P06733
2	GO:0032501	multicellular organismal process	Biological Process	70	P63173,P35579,P31151,P11021,Q08211,Q9NR30,P38159,Q86V81,Q00610,P35580,Q16643,Q08J23,P78527,Q6DKI1,Q9UMS4,P14618,P62330,O14578,P62753,P30048,P16615,P08590,O14958,P63316,Q15050,P13639,P11388,Q7Z406,P11055,O75369,P19105,P14649,P50402,Q9Y623,P45973,A0A0F7G8J1,Q7Z554,P16104,Q9Y3A2,P61026,P12956,P18085,Q9P0M6,P13010,Q96SB3,P63104,P38919,P61160,P09874,P12277,Q9NZI8,P12814,Q86YZ3,P23396,P09496,P24928,Q9H…
2	GO:0032502	developmental process	Biological Process	63	P63173,P35579,P31151,P11021,Q08211,Q9NR30,P38159,Q86V81,Q00610,P35580,Q16643,Q08J23,P78527,Q6DKI1,Q9UMS4,P14618,P62330,O14578,P62753,P30048,Q15050,P13639,P11388,Q96SB3,O75369,Q9Y6M1,O00425,Q9Y3A2,P61026,P12956,P18085,Q9P0M6,P13010,P50402,P11055,Q7Z406,P14649,P63104,P16615,P12277,P16104,Q9NZI8,P12814,P09874,P31942,Q86YZ3,P24928,O14958,O75367,P38919,Q5HYL6,Q5U071,P08590,P63316,Q9NWT1,P61160,Q04837,…
2	GO:0040011	locomotion	Biological Process	11	P35580,P31151,P18085,Q96SB3,O43707,P11021,P35579,P25705,P62330,O15144,Q9H444
2	GO:0048511	rhythmic process	Biological Process	4	P11021,P11388,P78527,Q08211
2	GO:0048518	positive regulation of biological process	Biological Process	81	A0A3G2LMJ8,P12956,P13010,P78527,Q9NR30,P09874,P24941,Q86V81,Q9Y5B9,P05141,P30048,O60884,P46087,P16615,O15144,P23396,Q5U071,P06733,P31151,P11021,P38919,Q15717,P13639,P98179,Q9H0A0,O43707,F6RFD5,P62330,P16403,P17096,Q92522,P10599,P17987,O14578,Q08211,Q13243,Q9NW64,P24928,A0A024RBS1,O75367,B4DXW1,F8WDD7,B2R4D5,P61160,O15143,A0A1W2PNV4,Q15185,P62753,O00422,P11388,Q9Y3A2,P25705,Q9P0M6,Q9UMS4,P16104,Q1…
2	GO:0048519	negative regulation of biological process	Biological Process	87	P16104,P22626,P09874,O75367,P06733,P16403,Q9P0M6,P10599,P45973,P24941,P35251,P05387,P32969,P08708,P23396,P62750,P63173,P30050,P60866,P42677,P62269,P62280,P18124,P36578,Q02878,Q9Y3U8,P38919,P61326,P62424,P42766,P62851,P83881,P26373,P62753,P49207,P25398,Q9Y5S9,P78527,P25705,A0A3G2LMJ8,B1AK87,A8K0T9,C9JUG7,O14958,Q96SB3,P18085,P63104,P30048,P11021,P17096,Q9NWT1,Q9NZI8,Q5U071,P04406,S4R2Y4,P12956,Q12…
2	GO:0050789	regulation of biological process	Biological Process	157	Q86V81,P16104,P22626,P09874,O75367,P06733,P16403,Q9P0M6,P10599,P45973,P24941,P35251,P05387,P32969,P08708,P23396,P62750,P63173,P30050,P60866,P42677,P62269,P62280,P18124,P36578,Q02878,Q9Y3U8,P38919,P61326,P62424,P42766,P62851,P83881,P26373,P62753,P49207,P25398,Q9Y5S9,P38159,O00422,J3QL05,Q13243,Q96SB3,P78527,P25705,A0A3G2LMJ8,P16615,P08590,O14958,P12956,P13010,Q9NR30,H7C1M2,B1AK87,A8K0T9,C9JUG7,B7Z…
2	GO:0050896	response to stimulus	Biological Process	90	B4DEB2,P16104,P31151,P09874,P49916,Q96SB3,O43707,P14618,P35580,P35579,A0A3G2LMJ8,P12956,P13010,P78527,P62753,Q5U071,Q9NR30,P13639,P11021,P04406,O75531,P06733,P17096,M0R3F1,P26641,P45973,A0A0F7G8J1,B7ZAY2,Q15185,P63104,O14654,O75369,B2RE34,O14578,O14958,P23396,B5BUB1,Q9Y5B9,Q08945,P24941,M0R0Y3,E7ESD9,Q9UMS4,P35251,P24928,Q08211,Q13151,B4DY09,P11388,A0A0C4DFX7,P30048,P16615,Q9Y5M8,P18085,Q9GZL7,Q9…
2	GO:0051179	localization	Biological Process	102	Q15050,Q96GA3,A8K7D9,P35580,O43707,P12814,P61026,P18085,B4DXN3,P62330,O14958,O94906,Q86V81,P38919,P61326,Q13243,Q9Y5S9,P22626,Q92621,P63104,P05387,P32969,P08708,P23396,P62750,P63173,P30050,P60866,P42677,P62269,P62280,P18124,P36578,Q02878,Q9Y3U8,P62424,P42766,P62851,P83881,P26373,P62753,P49207,P25398,Q9H444,P12236,P24941,E9PMI6,P09496,Q00610,P35579,F5H018,O75369,B2RA72,P05141,P31151,Q5HYM2,P02774,…
2	GO:0051704	multi-organism process	Biological Process	54	P30048,P31151,P04406,O75531,P06733,P17096,M0R3F1,P26641,P11388,P16104,Q08J23,P55769,P17987,Q5U071,P05141,P12236,Q86V81,P45973,Q92621,Q9H444,P05387,P32969,P08708,P23396,P62750,P63173,P30050,P60866,P42677,P62269,P62280,P18124,P36578,Q02878,Q9Y3U8,P62424,P42766,P62851,P83881,P26373,P62753,P49207,P25398,P16615,Q13151,Q15365,Q08211,Q12906,P24928,Q9NR30,Q96SB3,Q6P2Q9,P12956,P13010
2	GO:0065007	biological regulation	Biological Process	166	Q86V81,P16104,P22626,P09874,O75367,P06733,P16403,Q9P0M6,P10599,P45973,P24941,P35251,P05387,P32969,P08708,P23396,P62750,P63173,P30050,P60866,P42677,P62269,P62280,P18124,P36578,Q02878,Q9Y3U8,P38919,P61326,P62424,P42766,P62851,P83881,P26373,P62753,P49207,P25398,Q9Y5S9,P38159,O00422,J3QL05,Q13243,P12956,Q15185,P13010,P78527,E7ESD9,Q96SB3,P25705,A0A3G2LMJ8,P16615,P08590,O14958,Q9NR30,H7C1M2,B1AK87,A8K…
2	GO:0071840	cellular component organization or biogenesis	Biological Process	152	A8K4Z4,B4DHZ2,B2R5U7,P62750,P30050,Q02878,A8K800,Q15050,P46087,P42677,A0A0B4J2E5,Q96GA3,B0AZQ4,P23258,Q9H0A0,P35579,P04406,P68371,Q9UMS4,Q6P2Q9,O94906,P62314,O75533,P62318,P62306,E9PMI6,I3L2C7,Q8IY81,Q9NY12,Q9Y4W2,Q9NV06,Q14692,P18124,P42766,Q6DKI1,B4DEN9,Q9GZL7,B5MCF9,P55769,P62424,P11388,P09874,P12956,Q15185,P13010,P78527,E7ESD9,A0A2U3TZL8,Q96SB3,A0A024RC67,P35580,A0A024R1X8,O75369,O75367,P1610…
3	GO:0019953	sexual reproduction	Biological Process	7	P11388,P16104,Q08J23,P55769,P17987,P62753,Q96SB3
3	GO:0032504	multicellular organism reproduction	Biological Process	7	P11021,P30048,P11388,P16104,Q08J23,P62753,Q96SB3
3	GO:0055114	oxidation-reduction process	Biological Process	12	P11177,Q13584,Q0QF37,Q0QF12,P13804,P38117,B4DRH6,P30048,P04406,P06733,P14618,P10599
3	GO:0006807	nitrogen compound metabolic process	Biological Process	259	B4DEB2,Q86V81,Q08211,Q9Y5B9,A0A087X270,Q08945,H7C5P4,P24941,P22626,P09874,O75367,P06733,P16403,Q9P0M6,P10599,P45973,P35251,Q9H0A0,P05387,P32969,P08708,P23396,P62750,P63173,P30050,P60866,P42677,P62269,P62280,P18124,P36578,Q02878,Q9Y3U8,P38919,P61326,P62424,P42766,P62851,P83881,P26373,P62753,P49207,P25398,Q9Y5S9,Q9UMS4,Q6P2Q9,O94906,P62314,O75533,P38159,O00422,J3QL05,Q13243,P62318,P62306,E9PMI6,I3L…
3	GO:0009056	catabolic process	Biological Process	53	P05387,P32969,P08708,P23396,P62750,P63173,P30050,P60866,P42677,P62269,P62280,P18124,P36578,Q02878,Q9Y3U8,P38919,P61326,P62424,P42766,P62851,P83881,P26373,P62753,P49207,P25398,Q9Y5S9,P04406,P14618,B4DHM5,Q92621,H0YLS6,E5RJR5,B4DRH6,Q9H444,Q00610,Q9UMS4,Q9NZI8,Q96HS1,P11021,P24941,P09496,P13804,P38117,Q9NSM5,P30048,Q15717,P63104,Q9Y6M1,O00425,P06733,Q08211,Q13151,P68104
3	GO:0009058	biosynthetic process	Biological Process	186	Q08211,Q9Y5B9,A0A087X270,Q08945,H7C5P4,P24941,P22626,P09874,O75367,P06733,P16403,Q9P0M6,P10599,P45973,P35251,Q15185,P32969,P63173,J3QQQ9,Q02878,Q9Y3U8,P83881,Q9NR30,P38159,P24928,P62318,P62306,P11177,P04406,P14618,B4DHM5,Q92621,H0Y4R1,A0A384N647,Q53SY7,Q04837,P17096,A4FS09,B4DDF5,B1AHA9,Q8NHX6,P49916,B4DUA2,C9JLU1,Q6E433,Q92522,A0A075B7D9,Q8TDG2,I3L1L3,Q5T6W2,O00422,P46087,A0A248RGE3,P68104,P0538…
3	GO:0009892	negative regulation of metabolic process	Biological Process	64	P22626,P09874,O75367,P06733,P16403,Q9P0M6,P10599,P45973,P24941,P35251,P05387,P32969,P08708,P23396,P62750,P63173,P30050,P60866,P42677,P62269,P62280,P18124,P36578,Q02878,Q9Y3U8,P38919,P61326,P62424,P42766,P62851,P83881,P26373,P62753,P49207,P25398,Q9Y5S9,P78527,A0A3G2LMJ8,Q9NZI8,Q5U071,P04406,S4R2Y4,P12956,Q12906,P17096,P13010,Q8TDG2,Q9Y6M1,O00425,Q08211,Q92522,Q9H0A0,P30048,Q15717,P63104,P38159,O00…
3	GO:0009893	positive regulation of metabolic process	Biological Process	51	Q86V81,Q9Y5B9,P23396,Q5U071,P06733,P38919,Q15717,P13639,P98179,Q9H0A0,P11021,P16403,P17096,Q92522,P10599,P17987,P13010,P24941,Q13243,Q9NW64,P24928,A0A024RBS1,Q15185,Q08211,P16104,O75367,Q9NR30,O75533,P12956,Q12906,P35251,I3L397,Q8TED0,Q15061,P09874,P38159,P18085,Q15365,P61160,P11388,P78527,O94906,Q9UMS4,Q13595,Q7L0Y3,P31151,Q9NZI8,Q13151,Q9H8H0,P35579,P22626
3	GO:0019222	regulation of metabolic process	Biological Process	109	Q86V81,P22626,P09874,O75367,P06733,P16403,Q9P0M6,P10599,P45973,P24941,P35251,P05387,P32969,P08708,P23396,P62750,P63173,P30050,P60866,P42677,P62269,P62280,P18124,P36578,Q02878,Q9Y3U8,P38919,P61326,P62424,P42766,P62851,P83881,P26373,P62753,P49207,P25398,Q9Y5S9,P38159,O00422,J3QL05,Q13243,Q96SB3,P78527,A0A3G2LMJ8,Q92621,B4DUA2,Q6E433,P17096,Q92522,A0A075B7D9,Q8TDG2,I3L1L3,P24928,Q08211,Q5T6W2,P46087…
3	GO:0032259	methylation	Biological Process	8	Q8IY81,P62318,Q08J23,P09874,O75367,P46087,Q7L0Y3,P16403
3	GO:0042440	pigment metabolic process	Biological Process	1	Q15374
3	GO:0044237	cellular metabolic process	Biological Process	269	B4DEB2,Q86V81,Q08211,Q9Y5B9,A0A087X270,Q08945,H7C5P4,P24941,P22626,P09874,O75367,P06733,P16403,Q9P0M6,P10599,P45973,P35251,Q9H0A0,P05387,P32969,P08708,P23396,P62750,P63173,P30050,P60866,P42677,P62269,P62280,P18124,P36578,Q02878,Q9Y3U8,P38919,P61326,P62424,P42766,P62851,P83881,P26373,P62753,P49207,P25398,Q9Y5S9,Q9UMS4,Q6P2Q9,O94906,P62314,O75533,P38159,O00422,J3QL05,Q13243,P62318,P62306,E9PMI6,I3L…
3	GO:0044238	primary metabolic process	Biological Process	267	B4DEB2,Q86V81,Q08211,Q9Y5B9,A0A087X270,Q08945,H7C5P4,P24941,P22626,P09874,O75367,P06733,P16403,Q9P0M6,P10599,P45973,P35251,Q9H0A0,P05387,P32969,P08708,P23396,P62750,P63173,P30050,P60866,P42677,P62269,P62280,P18124,P36578,Q02878,Q9Y3U8,P38919,P61326,P62424,P42766,P62851,P83881,P26373,P62753,P49207,P25398,Q9Y5S9,Q9UMS4,Q6P2Q9,O94906,P62314,O75533,P38159,O00422,J3QL05,Q13243,P62318,P62306,E9PMI6,I3L…
3	GO:0044281	small molecule metabolic process	Biological Process	47	Q15185,P11177,P04406,P06733,P14618,B4DHM5,Q13584,Q0QF37,Q0QF12,B8ZZ51,Q92621,H0Y4R1,A0A384N647,Q53SY7,H0YIC2,Q9H9J7,Q5JTZ9,C9J7S3,A8K5W7,Q9NVC0,U3KQ50,H0YHS6,B3KUZ8,B4DY32,P54886,B4E1E0,C9JIJ6,B3KMB7,P12277,B4DRH6,P10599,Q1RMG2,B4DU83,P25705,Q15374,Q0QEN7,H7C086,B4DL14,H0YIZ0,F5H793,P13804,P38117,P02774,P11055,Q9Y623,Q00610,P09874
3	GO:0070085	glycosylation	Biological Process	1	Q96HX3
3	GO:0071704	organic substance metabolic process	Biological Process	272	B4DEB2,Q86V81,Q08211,Q9Y5B9,A0A087X270,Q08945,H7C5P4,P24941,P22626,P09874,O75367,P06733,P16403,Q9P0M6,P10599,P45973,P35251,Q9H0A0,P05387,P32969,P08708,P23396,P62750,P63173,P30050,P60866,P42677,P62269,P62280,P18124,P36578,Q02878,Q9Y3U8,P38919,P61326,P62424,P42766,P62851,P83881,P26373,P62753,P49207,P25398,Q9Y5S9,Q9UMS4,Q6P2Q9,O94906,P62314,O75533,P38159,O00422,J3QL05,Q13243,P62318,P62306,E9PMI6,I3L…
3	GO:1990845	adaptive thermogenesis	Biological Process	1	Q96HS1
3	GO:0001909	leukocyte mediated cytotoxicity	Biological Process	1	P68371
3	GO:0031341	regulation of cell killing	Biological Process	1	P04406
3	GO:0031343	positive regulation of cell killing	Biological Process	1	P04406
3	GO:0031640	killing of cells of other organism	Biological Process	1	P04406
3	GO:0001776	leukocyte homeostasis	Biological Process	1	P62753
3	GO:0002200	somatic diversification of immune receptors	Biological Process	1	P78527
3	GO:0002252	immune effector process	Biological Process	18	A0A3G2LMJ8,P62753,P78527,Q9NR30,P68371,O15144,P61160,O15143,P68104,P12956,P61026,P14618,P31151,P13639,Q86YZ3,P13010,Q08211,Q12906
3	GO:0002253	activation of immune response	Biological Process	8	A0A3G2LMJ8,P12956,P13010,P78527,P23396,O15144,P61160,O15143
3	GO:0002262	myeloid cell homeostasis	Biological Process	3	P08708,P62753,Q5HYL6
3	GO:0002440	production of molecular mediator of immune response	Biological Process	2	P78527,Q9NR30
3	GO:0002520	immune system development	Biological Process	11	Q15050,P13639,P11388,P78527,P30048,P35579,P12814,P09874,P62753,Q5HYL6,P13010
3	GO:0002682	regulation of immune system process	Biological Process	11	A0A3G2LMJ8,P12956,P13010,P78527,Q9NR30,P31151,P23396,O15144,P61160,O15143,Q08211
3	GO:0002683	negative regulation of immune system process	Biological Process	2	A0A3G2LMJ8,P78527
3	GO:0002684	positive regulation of immune system process	Biological Process	11	A0A3G2LMJ8,P12956,P13010,P78527,Q9NR30,P31151,P23396,O15144,P61160,O15143,Q08211
3	GO:0006955	immune response	Biological Process	22	A0A3G2LMJ8,P12956,P13010,P78527,P62753,Q5U071,Q9NR30,P31151,P68371,P23396,O15144,P61160,O15143,P68104,P61026,P14618,P13639,Q86YZ3,Q08211,P04406,O75369,B4DY09
3	GO:0019882	antigen processing and presentation	Biological Process	3	P09496,Q00610,P61026
3	GO:0045321	leukocyte activation	Biological Process	14	P35579,P62753,P78527,P23396,P68104,P68371,P12956,P61026,P14618,P31151,P13639,P61160,Q86YZ3,P13010
3	GO:0050900	leukocyte migration	Biological Process	2	P31151,P35579
3	GO:0016049	cell growth	Biological Process	3	Q96SB3,P06733,Q16643
3	GO:0040008	regulation of growth	Biological Process	4	Q96SB3,P06733,Q16643,P78527
3	GO:0045926	negative regulation of growth	Biological Process	2	P06733,Q96SB3
3	GO:0045927	positive regulation of growth	Biological Process	2	Q16643,P78527
3	GO:0048589	developmental growth	Biological Process	4	Q9UMS4,P14618,Q16643,P78527
3	GO:0007611	learning or memory	Biological Process	4	P18085,Q96SB3,P38919,P61160
3	GO:0019098	reproductive behavior	Biological Process	1	Q96SB3
3	GO:0035640	exploration behavior	Biological Process	1	P38919
3	GO:0071625	vocalization behavior	Biological Process	1	Q7Z406
3	GO:0001833	inner cell mass cell proliferation	Biological Process	1	Q9UMS4
3	GO:0008284	positive regulation of cell proliferation	Biological Process	8	P23396,Q08211,P78527,P05141,P30048,O60884,P46087,P24941
3	GO:0008285	negative regulation of cell proliferation	Biological Process	3	P25705,P50402,P17096
3	GO:0014009	glial cell proliferation	Biological Process	1	P13639
3	GO:0033002	muscle cell proliferation	Biological Process	3	P12956,P13010,P78527
3	GO:0042127	regulation of cell proliferation	Biological Process	15	P25705,P05141,P30048,O60884,P46087,P24941,P17096,P23396,Q08211,P78527,P50402,P12956,P13010,Q5U071,Q96SB3
3	GO:0048144	fibroblast proliferation	Biological Process	3	Q08211,P78527,P50402
3	GO:0050673	epithelial cell proliferation	Biological Process	2	P25705,P78527
3	GO:0061351	neural precursor cell proliferation	Biological Process	3	Q9NZI8,P61026,Q16643
3	GO:0070661	leukocyte proliferation	Biological Process	2	P62753,P23396
3	GO:0072089	stem cell proliferation	Biological Process	2	P61026,Q5U071
3	GO:0007059	chromosome segregation	Biological Process	10	P23258,P11388,B4DXN3,Q15050,Q9H444,P61160,O75367,P23396,P05141,O75531
3	GO:0007017	microtubule-based process	Biological Process	12	P35579,P23258,P04406,P68371,A0A024RC67,A0A384P5W4,P24941,Q9H444,P61160,P23396,Q00610,A0A2U3TZL8
3	GO:0000075	cell cycle checkpoint	Biological Process	7	P16104,P24941,P62753,Q08J23,P11388,Q9UMS4,P78527
3	GO:0001775	cell activation	Biological Process	16	P35579,P62753,P78527,P63104,P23396,P68104,P68371,P12956,P61026,P14618,P31151,P13639,P61160,Q86YZ3,P13010,P19105
3	GO:0006457	protein folding	Biological Process	15	B7Z597,O60884,P11021,Q15185,B7Z5C0,B7Z2F4,B3KX11,F8VQ14,P17987,F8WE65,B3KM81,Q9H072,Q7Z759,Q8TAA5,A1JUI8
3	GO:0007165	signal transduction	Biological Process	45	B2RE34,O14578,P24941,P11021,P16615,Q9Y5M8,P18085,P09874,Q9GZL7,P35579,Q9BRL5,Q96SB3,O14654,P24928,Q8TDG2,P78527,Q9NWT1,O14958,P63104,P23396,P62753,P61026,O43707,P62330,P22626,P17987,O15144,P61160,O15143,Q9NR30,P10599,Q00610,P50402,P31151,Q9UMS4,P38919,P05141,Q9Y5B9,Q15050,Q08945,P46087,P06733,B7ZAY2,Q15185,O75369
3	GO:0006928	movement of cell or subcellular component	Biological Process	20	P35580,A0A384P5W4,P35579,Q7Z406,P11055,Q9Y623,P31151,P61160,P18085,Q96SB3,P08590,P14649,P63316,O43707,P11021,P25705,P12814,P62330,O15144,A0A2U3TZL8
3	GO:0006949	syncytium formation	Biological Process	1	P35579
3	GO:0007049	cell cycle	Biological Process	32	P23258,P16104,P62753,P24941,P68371,O14578,P35579,Q00610,P35580,Q9H444,P11388,A0A2U3TZL8,Q13243,H7C1M2,Q96SB3,B4DXN3,Q15050,O75531,P50402,P61160,P35251,A0A024RC67,Q08J23,O75367,P23396,P45973,P78527,A0A386NC25,P49916,B4DDF5,P62330,P09496
3	GO:0007154	cell communication	Biological Process	48	Q96SB3,B7ZAY2,Q15185,P63104,O14654,O75369,B2RE34,O14578,P24941,P11021,P16615,Q9Y5M8,P18085,P09874,Q9GZL7,P35579,Q9BRL5,P05141,P12236,P24928,Q8TDG2,P78527,Q9NWT1,Q16643,O14958,Q7Z406,P23396,P62753,P61026,O43707,P62330,P22626,P17987,O15144,P61160,O15143,Q9NR30,P10599,Q00610,P50402,P31151,Q9UMS4,P38919,Q9Y5B9,Q15050,Q08945,P46087,P06733
3	GO:0007163	establishment or maintenance of cell polarity	Biological Process	5	P35579,P18085,P61026,P62330,P61160
3	GO:0008219	cell death	Biological Process	26	P09874,P23396,A0A386NC25,P12236,P62753,P14618,P18085,P63104,P30048,P78527,P11021,O43707,P12814,P11388,P62330,O00422,Q9Y3A2,P04406,O14578,Q9H444,Q96HS1,Q08211,P05141,P10599,P06733,P17987
3	GO:0008037	cell recognition	Biological Process	2	P17987,P63104
3	GO:0016043	cellular component organization	Biological Process	117	P62750,P30050,Q02878,A8K800,Q15050,P46087,P42677,A0A0B4J2E5,B0AZQ4,P23258,P35579,P04406,P68371,Q9UMS4,Q6P2Q9,O94906,P62314,O75533,P62318,P62306,E9PMI6,I3L2C7,P55769,P11388,P09874,P12956,Q15185,P13010,P78527,E7ESD9,A0A2U3TZL8,Q96SB3,A0A024RC67,P35580,A0A024R1X8,O75369,O75367,P16104,P16403,Q9P0M6,H0YHC3,Q92522,O43707,P12814,C9JAM8,B1AK87,A8K0T9,C9JUG7,E9PLJ3,F6RFD5,Q5HYL6,K7EJ44,Q59H95,Q04837,Q5U07…
3	GO:0016458	gene silencing	Biological Process	9	Q08211,P22626,P16403,P17096,Q92522,P24928,Q92621,Q15717,P24941
3	GO:0019725	cellular homeostasis	Biological Process	8	O14958,V9HW35,P10599,P30048,P16615,E9PMI6,P12277,P35251
3	GO:0022402	cell cycle process	Biological Process	24	P23258,P62753,P24941,P68371,O14578,P35579,P35580,Q9H444,P11388,A0A2U3TZL8,Q96SB3,B4DXN3,Q15050,O75531,P50402,P61160,P35251,A0A024RC67,Q08J23,O75367,P23396,Q00610,P45973,P78527
3	GO:0022406	membrane docking	Biological Process	3	P61026,P68371,P23258
3	GO:0022412	cellular process involved in reproduction in multicellular organism	Biological Process	3	P11388,Q08J23,P62753
3	GO:0030029	actin filament-based process	Biological Process	33	A0A2U3TZL8,O43707,P12814,C9JAM8,B1AK87,A8K0T9,C9JUG7,F6RFD5,Q59H95,E9PLJ3,Q96SB3,Q5HYL6,K7EJ44,O75369,Q16643,O14578,P35580,P35579,Q7Z406,P11055,Q9Y623,F8WDD7,O15144,P08590,P14649,P63316,P62330,B4DXW1,B2R4D5,P61160,O15143,A0A1W2PNV4,O14958
3	GO:0032940	secretion by cell	Biological Process	20	O43707,P12814,P35580,P61026,P05141,P12236,Q08211,P68104,P68371,P12956,P14618,P31151,P13639,P61160,Q86YZ3,P13010,P35579,P62330,P04406,P16615
3	GO:0045103	intermediate filament-based process	Biological Process	1	B4DJT7
3	GO:0048522	positive regulation of cellular process	Biological Process	71	P09874,P24941,Q86V81,Q9Y5B9,P05141,P30048,O60884,P46087,O15144,P06733,P31151,P11021,P38919,Q15717,P13639,P98179,Q9H0A0,P23396,O43707,F6RFD5,P62330,P16403,P17096,Q92522,P10599,P17987,P13010,O14578,Q13243,Q9NW64,P24928,A0A024RBS1,O75367,B4DXW1,F8WDD7,B2R4D5,P61160,O15143,A0A1W2PNV4,Q08211,Q15185,P62753,O00422,P11388,P78527,Q9Y3A2,Q9NR30,P25705,Q9P0M6,Q9UMS4,P16104,Q16643,P12956,Q12906,P35251,I3L397…
3	GO:0048523	negative regulation of cellular process	Biological Process	57	P16104,P22626,P09874,O75367,P06733,P16403,Q9P0M6,P10599,P45973,P24941,P35251,P78527,P25705,A0A3G2LMJ8,B1AK87,A8K0T9,C9JUG7,Q96SB3,P62753,P18085,P63104,P30048,P11021,P17096,Q9NWT1,O14958,P04406,S4R2Y4,P12956,Q12906,P13010,Q8TDG2,P23396,Q9NZI8,P38919,Q9Y6M1,O00425,Q92522,Q9H0A0,Q08J23,P11388,P38159,O00422,P50402,Q15717,P62330,O43707,P12814,Q5HYL6,Q9H444,Q08211,Q13151,Q9UMS4,P49916,Q00610,P05141,P35…
3	GO:0048869	cellular developmental process	Biological Process	45	Q08211,Q9NR30,P38159,Q86V81,Q00610,P35580,Q15050,P13639,P11388,P78527,O75369,Q08J23,P61026,P35579,P63104,Q7Z406,P11021,Q96SB3,P62753,P30048,P31151,P12814,P09874,P31942,Q86YZ3,P16615,P50402,O14958,P11055,O75367,Q9P0M6,Q9UMS4,Q16643,O14578,Q5HYL6,Q5U071,P13010,P18085,P62330,P61160,Q04837,P16104,P17096,O43707,O15144
3	GO:0050794	regulation of cellular process	Biological Process	128	Q86V81,P16104,P22626,P09874,O75367,P06733,P16403,Q9P0M6,P10599,P45973,P24941,P35251,P38159,P61326,O00422,J3QL05,Q13243,Q9Y5S9,Q96SB3,P78527,P25705,A0A3G2LMJ8,H7C1M2,B1AK87,A8K0T9,C9JUG7,B7ZAY2,Q15185,P63104,O14654,O75369,B2RE34,O14578,Q92621,V9HW35,P30048,B4DUA2,Q02878,Q6E433,P17096,Q92522,A0A075B7D9,Q8TDG2,I3L1L3,P24928,Q08211,Q5T6W2,P46087,P63173,P98179,A0A0F7L0Q8,Q59GC1,Q9BSH4,A0A024RBS1,P1102…
3	GO:0051301	cell division	Biological Process	17	P35580,Q9H444,O14578,A0A2U3TZL8,P61160,A0A024RC67,P35579,P11388,P61026,P23396,P49916,P62330,P24941,P09496,Q08J23,B4DSH1,Q00610
3	GO:0051651	maintenance of location in cell	Biological Process	4	O75369,Q16643,P11021,P10599
3	GO:0051716	cellular response to stimulus	Biological Process	70	B4DEB2,P16104,P09874,P49916,Q96SB3,B7ZAY2,Q15185,P63104,O14654,O75369,B2RE34,O14578,P23396,B5BUB1,Q9Y5B9,Q08945,P24941,M0R0Y3,E7ESD9,Q9UMS4,P35251,P24928,P17096,P13010,P78527,P12956,P11388,P45973,A0A0C4DFX7,P11021,P16615,Q9Y5M8,P18085,Q9GZL7,P35579,Q9BRL5,Q8TDG2,Q9NWT1,Q9NZI8,P31151,O14958,P62753,P61026,P14618,Q13243,O43707,P30048,P13639,P62330,Q9NW64,P22626,P17987,P61160,O15144,O15143,Q9NR30,Q08…
3	GO:0061919	process utilizing autophagic mechanism	Biological Process	5	Q9H444,Q00610,Q96HS1,P04406,P68104
3	GO:0071804	cellular potassium ion transport	Biological Process	1	O14958
3	GO:0090618	DNA clamp unloading	Biological Process	1	P35251
3	GO:0097194	execution phase of apoptosis	Biological Process	2	P11388,P23396
3	GO:0140029	exocytic process	Biological Process	1	P61026
3	GO:0140253	cell-cell fusion	Biological Process	1	P35579
3	GO:0003006	developmental process involved in reproduction	Biological Process	6	P11021,P62753,P30048,Q08J23,P78527,Q96SB3
3	GO:0009566	fertilization	Biological Process	2	P55769,P17987
3	GO:0022602	ovulation cycle process	Biological Process	1	P11021
3	GO:0035036	sperm-egg recognition	Biological Process	1	P17987
3	GO:0044703	multi-organism reproductive process	Biological Process	8	P30048,P11388,P16104,Q08J23,P55769,P17987,P62753,Q96SB3
3	GO:0048609	multicellular organismal reproductive process	Biological Process	7	P11021,P30048,P11388,P16104,Q08J23,P62753,Q96SB3
3	GO:0051321	meiotic cell cycle	Biological Process	7	P35579,P23258,P11388,P61160,Q08J23,P16104,P24941
3	GO:1903046	meiotic cell cycle process	Biological Process	5	P35579,P23258,P11388,P61160,Q08J23
3	GO:0007155	cell adhesion	Biological Process	11	Q68DY8,P23396,P12814,P35579,P19105,O43707,O15144,P35580,P16615,A0A024R1X8,P62330
3	GO:0007267	cell-cell signaling	Biological Process	9	P05141,P12236,Q16643,Q96SB3,Q00610,P50402,O14958,P38919,P16615
3	GO:0023051	regulation of signaling	Biological Process	25	P05141,P12236,Q8TDG2,Q9NWT1,P09874,P23396,P11021,Q16643,P62330,Q9NR30,Q96SB3,P10599,O14958,P50402,P31151,P38919,P63104,O43707,Q9Y5B9,Q15050,Q08945,P46087,P24941,P16615,P06733
3	GO:0023056	positive regulation of signaling	Biological Process	7	P23396,P09874,Q9NR30,P10599,P31151,P63104,O43707
3	GO:0023057	negative regulation of signaling	Biological Process	7	Q9NWT1,P11021,O14958,P50402,P38919,P05141,P06733
3	GO:0035637	multicellular organismal signaling	Biological Process	3	Q7Z406,O14958,P16615
3	GO:0001503	ossification	Biological Process	6	Q08211,Q9NR30,P38159,Q86V81,Q00610,P63173
3	GO:0001816	cytokine production	Biological Process	10	Q9NR30,Q08211,P12956,P13010,P78527,P23396,Q9NZI8,Q9Y6M1,O00425,P04406
3	GO:0003008	system process	Biological Process	20	P16615,P08590,O14958,P63316,Q7Z406,P13639,P11055,P19105,P14649,P50402,Q9Y623,Q7Z554,P63173,P18085,Q96SB3,P38919,P61160,P09874,P06733,P35580
3	GO:0007275	multicellular organism development	Biological Process	46	P63173,P35579,P31151,P11021,P35580,Q16643,Q08J23,P78527,Q6DKI1,Q9UMS4,P14618,P62330,O14578,P62753,P30048,Q15050,P13639,P11388,O75369,Q9Y3A2,P61026,P12956,P18085,Q9P0M6,P13010,P50402,P11055,Q7Z406,P14649,P63104,Q96SB3,P12277,P16104,Q9NZI8,P12814,P09874,Q86YZ3,O75367,P38919,Q5HYL6,Q5U071,P08590,P63316,Q00610,P61160,Q13243
3	GO:0007389	pattern specification process	Biological Process	1	P78527
3	GO:0007585	respiratory gaseous exchange	Biological Process	1	P63316
3	GO:0019827	stem cell population maintenance	Biological Process	4	P24928,Q9NZI8,Q15717,Q15061
3	GO:0022404	molting cycle process	Biological Process	1	Q08J23
3	GO:0031424	keratinization	Biological Process	1	Q86YZ3
3	GO:0034381	plasma lipoprotein particle clearance	Biological Process	2	P09496,Q00610
3	GO:0042303	molting cycle	Biological Process	1	Q08J23
3	GO:0044706	multi-multicellular organism process	Biological Process	1	P30048
3	GO:0048771	tissue remodeling	Biological Process	1	A0A0F7G8J1
3	GO:0048871	multicellular organismal homeostasis	Biological Process	3	Q9H444,Q86YZ3,Q96HS1
3	GO:0050817	coagulation	Biological Process	6	P45973,A0A0F7G8J1,P63104,P35579,P19105,A0A3S8NFS6
3	GO:0050879	multicellular organismal movement	Biological Process	5	P63316,Q7Z406,P16615,P13639,P11055
3	GO:0051239	regulation of multicellular organismal process	Biological Process	35	P16615,P08590,O14958,Q9NR30,P63316,Q7Z554,P09874,P11021,Q08211,P12956,P13010,P78527,P23396,Q9NZI8,Q9Y6M1,O00425,A0A0F7G8J1,P25705,O75367,Q9P0M6,Q9UMS4,Q16643,P06733,P04406,Q5U071,P62330,Q00610,P61160,P63104,P38919,Q96HS1,P14618,Q15717,Q15061,A0A3S8NFS6
3	GO:0051240	positive regulation of multicellular organismal process	Biological Process	19	Q9NR30,P16615,P09874,P11021,Q08211,P12956,P13010,P78527,P23396,P25705,O75367,Q9P0M6,Q9UMS4,Q16643,P06733,P04406,P62330,P61160,P14618
3	GO:0051241	negative regulation of multicellular organismal process	Biological Process	5	A0A0F7G8J1,P16615,P38919,Q96HS1,P62330
3	GO:0090130	tissue migration	Biological Process	3	P35579,P25705,P62330
3	GO:0097242	amyloid-beta clearance	Biological Process	1	Q00610
3	GO:0009653	anatomical structure morphogenesis	Biological Process	26	P35579,P31151,P78527,Q6DKI1,O75369,P62753,P61026,P35580,Q7Z406,P11021,P12814,P11055,P63173,O14958,Q16643,P38919,P08590,P63316,Q00610,P61160,Q04837,O43707,O15144,P14618,Q9Y6M1,O00425
3	GO:0007568	aging	Biological Process	5	P16104,P17096,P78527,P13639,Q96SB3
3	GO:0048646	anatomical structure formation involved in morphogenesis	Biological Process	9	P35579,P31151,P78527,Q6DKI1,P12814,O14958,P11055,P35580,P14618
3	GO:0021700	developmental maturation	Biological Process	2	Q08J23,P63104
3	GO:0048532	anatomical structure arrangement	Biological Process	1	P11021
3	GO:0048856	anatomical structure development	Biological Process	55	P63173,P35579,P31151,P11021,P35580,Q16643,Q08J23,P78527,Q6DKI1,Q9UMS4,P14618,P62330,O14578,P62753,P30048,Q15050,P13639,P11388,O75369,Q9Y6M1,O00425,Q9Y3A2,P61026,P12956,P18085,Q9P0M6,P13010,P50402,P11055,Q7Z406,P14649,P63104,P16615,Q96SB3,P12277,P16104,Q9NZI8,P12814,P09874,P31942,Q86YZ3,O14958,O75367,P38919,Q5HYL6,Q5U071,P08590,P63316,Q9NWT1,Q00610,P61160,Q04837,Q13243,O43707,O15144
3	GO:0050793	regulation of developmental process	Biological Process	22	P35580,P35579,Q7Z406,P11021,O75367,Q9P0M6,Q9UMS4,Q16643,P78527,Q5U071,P13010,Q00610,P62330,P61160,P63104,O43707,O15144,P14618,P09874,Q15717,Q15061,P17096
3	GO:0051093	negative regulation of developmental process	Biological Process	3	O43707,P62330,P78527
3	GO:0051094	positive regulation of developmental process	Biological Process	12	P11021,O75367,Q9P0M6,Q9UMS4,Q16643,P78527,P13010,P61160,O15144,P14618,P09874,P17096
3	GO:0098727	maintenance of cell number	Biological Process	4	P24928,Q9NZI8,Q15717,Q15061
3	GO:0040012	regulation of locomotion	Biological Process	6	P31151,O43707,P11021,P25705,P62330,Q9H444
3	GO:0040017	positive regulation of locomotion	Biological Process	6	P31151,O43707,P11021,P25705,P62330,Q9H444
3	GO:0042330	taxis	Biological Process	2	P35580,P31151
3	GO:0048870	cell motility	Biological Process	10	P35580,P31151,P18085,Q96SB3,O43707,P11021,P35579,P25705,P62330,O15144
3	GO:0052192	movement in environment of other organism involved in symbiotic interaction	Biological Process	1	Q9H444
3	GO:0007623	circadian rhythm	Biological Process	2	P11388,P78527
3	GO:0042698	ovulation cycle	Biological Process	1	P11021
3	GO:0043902	positive regulation of multi-organism process	Biological Process	5	P11388,Q08211,P24928,P04406,Q9H444
3	GO:0044089	positive regulation of cellular component biogenesis	Biological Process	12	P09874,O15144,P62330,P23396,B4DXW1,F8WDD7,B2R4D5,P61160,O15143,A0A1W2PNV4,Q8TED0,Q15061
3	GO:0045785	positive regulation of cell adhesion	Biological Process	2	P23396,O15144
3	GO:0048584	positive regulation of response to stimulus	Biological Process	18	A0A3G2LMJ8,P12956,P13010,P78527,Q9NR30,P31151,P23396,P09874,O15144,P61160,O15143,Q08211,P16104,P10599,P63104,O43707,O75367,P17096
3	GO:0051050	positive regulation of transport	Biological Process	8	O43707,Q08211,Q9NW64,P50402,P35580,P62330,P04406,P63104
3	GO:0051091	positive regulation of DNA-binding transcription factor activity	Biological Process	3	Q08211,P23396,P30048
3	GO:1902685	positive regulation of receptor localization to synapse	Biological Process	1	Q16643
3	GO:1903829	positive regulation of cellular protein localization	Biological Process	7	Q9NW64,P50402,P09874,P63104,P62330,Q96SB3,P17987
3	GO:1904181	positive regulation of membrane depolarization	Biological Process	1	P09874
3	GO:1904874	positive regulation of telomerase RNA localization to Cajal body	Biological Process	1	P17987
3	GO:1904951	positive regulation of establishment of protein localization	Biological Process	8	Q08211,Q9NW64,P50402,P35580,P62330,P04406,P63104,P17987
3	GO:0043901	negative regulation of multi-organism process	Biological Process	2	O75531,Q12906
3	GO:0048585	negative regulation of response to stimulus	Biological Process	13	A0A3G2LMJ8,Q9NWT1,P11021,A0A0F7G8J1,P23396,O14958,P50402,P38919,P05141,O75367,P10599,P06733,P78527
3	GO:0051051	negative regulation of transport	Biological Process	4	O14958,P10599,P62330,P05141
3	GO:1900047	negative regulation of hemostasis	Biological Process	1	A0A0F7G8J1
3	GO:1903828	negative regulation of cellular protein localization	Biological Process	4	P10599,Q00610,O75367,P62330
3	GO:1904950	negative regulation of establishment of protein localization	Biological Process	1	P10599
3	GO:0030155	regulation of cell adhesion	Biological Process	3	P23396,O43707,O15144
3	GO:0032879	regulation of localization	Biological Process	25	O14958,P05141,P12236,P31151,P61026,O43707,P11021,P63316,Q08211,Q9NW64,P25705,P10599,P50402,P62330,P35580,P04406,P12814,P16615,P09874,P63104,Q16643,Q00610,Q96SB3,O75367,P17987
3	GO:0042752	regulation of circadian rhythm	Biological Process	2	P11388,P78527
3	GO:0043900	regulation of multi-organism process	Biological Process	7	O75531,Q12906,P11388,Q08211,P24928,Q9H444,P04406
3	GO:0044087	regulation of cellular component biogenesis	Biological Process	19	B1AK87,A8K0T9,C9JUG7,P09874,O15144,Q16643,P62330,P23396,B4DXW1,F8WDD7,B2R4D5,P61160,O15143,A0A1W2PNV4,Q5HYL6,Q9H444,P13010,Q8TED0,Q15061
3	GO:0048583	regulation of response to stimulus	Biological Process	40	A0A3G2LMJ8,P12956,P13010,P78527,Q9NR30,Q8TDG2,Q9NWT1,P09874,P31151,P16615,P63316,P23396,P11021,P62330,O15144,P61160,O15143,A0A0F7G8J1,Q08211,P16104,P10599,O14958,P50402,P38919,Q15185,Q92621,P63104,P05141,O43707,Q9Y5B9,Q15050,Q08945,P46087,P24941,O75367,P06733,P35579,A0A3S8NFS6,Q96SB3,P17096
3	GO:0097006	regulation of plasma lipoprotein particle levels	Biological Process	2	P09496,Q00610
3	GO:0098900	regulation of action potential	Biological Process	1	P16615
3	GO:1900046	regulation of hemostasis	Biological Process	2	A0A0F7G8J1,A0A3S8NFS6
3	GO:0006950	response to stress	Biological Process	56	B4DEB2,P16104,P31151,P09874,P49916,O43707,P14618,P35580,P35579,A0A3G2LMJ8,P12956,P13010,P78527,Q5U071,P13639,P11021,P04406,P45973,A0A0F7G8J1,P23396,B5BUB1,Q9Y5B9,Q08945,P24941,M0R0Y3,E7ESD9,Q9UMS4,P35251,P24928,P17096,Q08211,Q13151,P11388,A0A0C4DFX7,P30048,Q9Y5M8,P68371,B3KM81,O60884,B7Z597,Q9NZI8,P16615,P63104,P61160,Q96SB3,Q9NR30,P18085,Q12906,P19105,O75369,Q15185,Q92621,O75367,P10599,P06733,A0…
3	GO:0009605	response to external stimulus	Biological Process	23	Q96SB3,A0A3G2LMJ8,P31151,P04406,O75531,P06733,P17096,M0R3F1,P26641,P35580,P14618,Q5U071,P16615,P30048,Q13151,P11021,A0A0F7G8J1,Q08211,P13639,Q9NR30,Q12906,Q6P2Q9,A0A3S8NFS6
3	GO:0009607	response to biotic stimulus	Biological Process	16	P31151,P04406,O75531,P06733,P17096,M0R3F1,P26641,P11021,Q5U071,P16615,P30048,Q13151,Q08211,Q9NR30,Q12906,Q6P2Q9
3	GO:0009628	response to abiotic stimulus	Biological Process	16	O43707,P14618,P10599,B3KM81,O60884,B7Z597,P16104,P09874,P78527,P16615,P11021,P12956,P13010,Q15185,Q92621,P06733
3	GO:0009719	response to endogenous stimulus	Biological Process	16	P09874,O14654,P24928,P11021,P13639,O15143,P61026,P14618,Q13243,P78527,Q96SB3,P61160,O14958,P68104,P62330,P38919
3	GO:0014823	response to activity	Biological Process	1	P78527
3	GO:0014854	response to inactivity	Biological Process	1	P14618
3	GO:0042221	response to chemical	Biological Process	44	P31151,Q96SB3,P11021,O14958,Q15185,Q9Y5M8,P09874,P35580,P14618,O14654,P24928,Q5U071,P13010,P63316,P38919,P63104,P13639,O15143,P16615,P30048,Q13151,P61026,Q13243,P78527,O43707,Q9NW64,P22626,P17987,P61160,Q9NR30,P49411,Q08211,P23396,Q6P2Q9,P04406,O75369,P38159,P50402,P68104,P24941,P10599,P06733,P62330,P05141
3	GO:0043500	muscle adaptation	Biological Process	3	P09874,P16615,P63316
3	GO:0043627	response to estrogen	Biological Process	1	O15143
3	GO:0051606	detection of stimulus	Biological Process	4	O14958,P09874,P23396,P35251
3	GO:0072376	protein activation cascade	Biological Process	2	A0A3G2LMJ8,A0A3S8NFS6
3	GO:0031503	protein-containing complex localization	Biological Process	10	Q15050,Q96GA3,P22626,Q86V81,P38919,P61326,Q13243,Q9Y5S9,Q92621,Q16643
3	GO:0033036	macromolecule localization	Biological Process	68	Q15050,Q96GA3,A8K7D9,O94906,Q86V81,P38919,P61326,Q13243,Q9Y5S9,P22626,Q92621,P63104,P05387,P32969,P08708,P23396,P62750,P63173,P30050,P60866,P42677,P62269,P62280,P18124,P36578,Q02878,Q9Y3U8,P62424,P42766,P62851,P83881,P26373,P62753,P49207,P25398,Q9H444,P12236,P61026,P18085,P62330,P09496,Q00610,O75369,P05141,P35579,O43707,F5H018,Q5HYM2,Q8TAA5,P11021,Q16643,Q9UMS4,Q08211,Q9NW64,P17987,P10599,P50402,…
3	GO:0051234	establishment of localization	Biological Process	94	Q15050,Q96GA3,A8K7D9,O43707,P12814,P61026,P18085,B4DXN3,P62330,O14958,Q86V81,P38919,P61326,Q13243,Q9Y5S9,P22626,Q92621,P63104,P05387,P32969,P08708,P23396,P62750,P63173,P30050,P60866,P42677,P62269,P62280,P18124,P36578,Q02878,Q9Y3U8,P62424,P42766,P62851,P83881,P26373,P62753,P49207,P25398,Q9H444,P12236,P24941,E9PMI6,P09496,Q00610,P35580,P35579,F5H018,B2RA72,P05141,Q5HYM2,P02774,E9PCX7,Q0QEN7,P25705,…
3	GO:0051235	maintenance of location	Biological Process	6	O14958,O75369,Q16643,P11021,P10599,P31151
3	GO:0051641	cellular localization	Biological Process	76	Q15050,Q96GA3,A8K7D9,Q86V81,P38919,P61326,Q13243,Q9Y5S9,P22626,Q92621,P63104,P05387,P32969,P08708,P23396,P62750,P63173,P30050,P60866,P42677,P62269,P62280,P18124,P36578,Q02878,Q9Y3U8,P62424,P42766,P62851,P83881,P26373,P62753,P49207,P25398,Q9H444,P12236,P61026,P18085,P62330,P09496,Q00610,F5H018,O75369,P35580,O14958,P61160,O43707,Q8TAA5,P11021,P35579,Q16643,P63316,Q9UMS4,Q5HYM2,Q9NW64,P25705,P10599,…
3	GO:0051674	localization of cell	Biological Process	10	P35580,P31151,P18085,Q96SB3,O43707,P11021,P35579,P25705,P62330,O15144
3	GO:1902579	multi-organism localization	Biological Process	3	P17987,Q86V81,Q92621
3	GO:0051707	response to other organism	Biological Process	15	P31151,P04406,O75531,P06733,P17096,M0R3F1,P26641,Q5U071,P16615,P30048,Q13151,Q08211,Q9NR30,Q12906,Q6P2Q9
3	GO:0044419	interspecies interaction between organisms	Biological Process	41	P05141,P16104,P12236,Q86V81,P45973,Q92621,Q9H444,P05387,P32969,P08708,P23396,P62750,P63173,P30050,P60866,P42677,P62269,P62280,P18124,P36578,Q02878,Q9Y3U8,P62424,P42766,P62851,P83881,P26373,P62753,P49207,P25398,P04406,Q15365,Q08211,P17987,O75531,Q12906,P11388,P24928,P12956,P17096,P13010
3	GO:0065008	regulation of biological quality	Biological Process	63	P09874,P12956,Q15185,P13010,P78527,E7ESD9,P16615,P08590,O14958,B1AK87,A8K0T9,C9JUG7,P45973,A0A0F7G8J1,V9HW35,P10599,P30048,E9PMI6,P62753,Q9NY12,P35251,O75369,P05141,P12236,O14578,P35580,P35579,Q7Z406,Q9NZI8,P04406,P17987,H0YIZ0,P63104,P12277,Q16643,F6RFD5,P62330,Q9H0A0,P63316,P08708,B4DXW1,F8WDD7,B2R4D5,O15144,P61160,O15143,A0A1W2PNV4,P11021,Q9H444,Q15717,Q9Y6M1,O00425,Q5HYL6,P31151,Q86YZ3,P19105…
3	GO:0065009	regulation of molecular function	Biological Process	24	P04406,P18085,P23396,P10599,O43707,P08590,P30048,A0A024RBS1,P13010,P63316,P12956,P09874,Q08211,Q04837,Q15185,P17987,O14958,O75367,P62330,P11021,P68104,H0YJH9,P38919,P22626
3	GO:0044085	cellular component biogenesis	Biological Process	106	A8K4Z4,B4DHZ2,B2R5U7,P62750,P30050,Q02878,A8K800,Q15050,P46087,P42677,A0A0B4J2E5,Q96GA3,Q9H0A0,Q9UMS4,Q6P2Q9,O94906,P62314,O75533,P62318,P62306,E9PMI6,I3L2C7,Q8IY81,Q9NY12,Q9Y4W2,Q9NV06,Q14692,P18124,P42766,Q6DKI1,B4DEN9,Q9GZL7,B5MCF9,P55769,P62424,A0A2U3TZL8,A0A024R1X8,O75367,P16104,P16403,Q9P0M6,H0YHC3,Q92522,O43707,P12814,C9JAM8,B1AK87,A8K0T9,C9JUG7,P09874,P08708,Q9NV31,Q9Y2X3,Q9NR30,P38919,M0…
4	GO:0007276	gamete generation	Biological Process	4	P11388,P16104,Q08J23,P62753
4	GO:0007618	mating	Biological Process	1	Q96SB3
4	GO:0022900	electron transport chain	Biological Process	3	P13804,P38117,Q0QF12
4	GO:0006735	NADH regeneration	Biological Process	3	P04406,P06733,P14618
4	GO:0015980	energy derivation by oxidation of organic compounds	Biological Process	6	P11177,Q13584,Q0QF37,Q0QF12,P13804,P38117
4	GO:0018158	protein oxidation	Biological Process	1	P30048
4	GO:0034440	lipid oxidation	Biological Process	3	B4DRH6,P13804,P38117
4	GO:0034641	cellular nitrogen compound metabolic process	Biological Process	239	B4DEB2,Q86V81,Q08211,Q9Y5B9,A0A087X270,Q08945,H7C5P4,P24941,P22626,P09874,O75367,P06733,P16403,Q9P0M6,P10599,P45973,P35251,Q9H0A0,P05387,P32969,P08708,P23396,P62750,P63173,P30050,P60866,P42677,P62269,P62280,P18124,P36578,Q02878,Q9Y3U8,P38919,P61326,P62424,P42766,P62851,P83881,P26373,P62753,P49207,P25398,Q9Y5S9,Q9UMS4,Q6P2Q9,O94906,P62314,O75533,P38159,O00422,J3QL05,Q13243,P62318,P62306,E9PMI6,I3L…
4	GO:0051171	regulation of nitrogen compound metabolic process	Biological Process	84	Q86V81,P22626,P09874,O75367,P06733,P16403,Q9P0M6,P10599,P45973,P24941,P35251,P38159,P61326,O00422,J3QL05,Q13243,Q9Y5S9,Q96SB3,P78527,A0A3G2LMJ8,Q92621,B4DUA2,Q02878,Q6E433,P17096,Q92522,A0A075B7D9,Q8TDG2,I3L1L3,P24928,Q08211,Q5T6W2,P46087,P63173,P98179,A0A0F7L0Q8,Q59GC1,Q9BSH4,A0A024RBS1,Q9Y5B9,Q9NZI8,Q15397,P04406,P38919,Q15717,P13639,Q9H0A0,S4R2Y4,P12956,Q12906,P13010,P23396,Q9Y6M1,O00425,P1102…
4	GO:0051172	negative regulation of nitrogen compound metabolic process	Biological Process	33	P22626,P09874,O75367,P06733,P16403,Q9P0M6,P10599,P45973,P24941,P35251,P78527,A0A3G2LMJ8,P04406,S4R2Y4,P12956,Q12906,P17096,P13010,Q8TDG2,P23396,Q9NZI8,P38919,Q9Y6M1,O00425,Q92522,Q9H0A0,P38159,O00422,Q15717,Q08211,Q13151,P49916,Q00610
4	GO:0051173	positive regulation of nitrogen compound metabolic process	Biological Process	44	Q86V81,Q9Y5B9,P06733,P38919,Q15717,P13639,P98179,Q9H0A0,P11021,P16403,P17096,Q92522,P23396,P10599,P17987,P13010,P24941,Q13243,Q9NW64,P24928,Q08211,P16104,P12956,Q12906,P35251,I3L397,Q8TED0,Q15061,P09874,P38159,P18085,Q15365,P61160,P11388,P78527,O94906,Q9UMS4,Q13595,Q15185,Q7L0Y3,P31151,Q9H8H0,P35579,P22626
4	GO:1901564	organonitrogen compound metabolic process	Biological Process	157	Q9UMS4,Q96SB3,P78527,A0A3G2LMJ8,P32969,P63173,J3QQQ9,Q02878,Q9Y3U8,P83881,Q9NV06,P11177,P04406,P14618,B4DHM5,Q92621,H0Y4R1,A0A384N647,Q53SY7,A0A248RGE3,P68104,P05387,K7EJT5,S4R456,Q5JR95,C9JYQ9,Q9BTQ7,Q8NI62,Q76N57,P08708,P23396,P62750,Q96IR1,F8W7C6,I3L3P7,D6RG13,A0A2R8Y811,A0A2R8Y849,G3V203,P30050,A0A087WXM6,A0PJ62,B3KS36,P60866,E9PQD7,P42677,P62269,J3KMX5,H0YLP6,P62280,P18124,P36578,M0R3D6,M0R2…
4	GO:0009894	regulation of catabolic process	Biological Process	12	Q92621,Q9NZI8,P04406,Q9NSM5,Q15717,P63104,Q9Y6M1,O00425,Q08211,Q13151,Q9H444,P68104
4	GO:0009895	negative regulation of catabolic process	Biological Process	5	Q15717,Q08211,Q9NZI8,Q13151,Q9H444
4	GO:0044248	cellular catabolic process	Biological Process	52	P05387,P32969,P08708,P23396,P62750,P63173,P30050,P60866,P42677,P62269,P62280,P18124,P36578,Q02878,Q9Y3U8,P38919,P61326,P62424,P42766,P62851,P83881,P26373,P62753,P49207,P25398,Q9Y5S9,P04406,P14618,B4DHM5,Q92621,H0YLS6,E5RJR5,B4DRH6,Q9H444,Q00610,Q9UMS4,Q9NZI8,Q96HS1,P11021,P24941,P09496,P13804,P38117,P30048,Q15717,P63104,Q9Y6M1,O00425,P06733,Q08211,Q13151,P68104
4	GO:0044282	small molecule catabolic process	Biological Process	6	B4DRH6,P13804,P38117,P04406,P06733,P14618
4	GO:1901575	organic substance catabolic process	Biological Process	51	P05387,P32969,P08708,P23396,P62750,P63173,P30050,P60866,P42677,P62269,P62280,P18124,P36578,Q02878,Q9Y3U8,P38919,P61326,P62424,P42766,P62851,P83881,P26373,P62753,P49207,P25398,Q9Y5S9,P04406,P14618,B4DHM5,Q92621,H0YLS6,E5RJR5,B4DRH6,Q9UMS4,Q9NZI8,P11021,P24941,P09496,Q00610,P13804,P38117,Q9NSM5,Q15717,P63104,Q9Y6M1,O00425,P06733,Q08211,Q13151,Q9H444,P68104
4	GO:0009889	regulation of biosynthetic process	Biological Process	66	P22626,P09874,O75367,P06733,P16403,Q9P0M6,P10599,P45973,P24941,P35251,Q92621,B4DUA2,Q02878,Q6E433,P17096,Q92522,A0A075B7D9,Q8TDG2,I3L1L3,P24928,Q08211,Q5T6W2,O00422,P46087,P63173,P61326,Q9Y5S9,P98179,A0A0F7L0Q8,Q59GC1,Q9BSH4,A0A024RBS1,Q86V81,Q9Y5B9,P38919,Q15717,P13639,Q9H0A0,S4R2Y4,P12956,Q12906,P13010,P04406,P23396,Q9NZI8,Q9Y6M1,O00425,P17987,Q15061,I3L397,Q8TED0,P38159,P18085,Q15365,P61160,P1…
4	GO:0009890	negative regulation of biosynthetic process	Biological Process	26	P22626,P09874,O75367,P06733,P16403,Q9P0M6,P10599,P45973,P24941,P35251,S4R2Y4,P12956,Q12906,P17096,P13010,Q8TDG2,P04406,P23396,Q9NZI8,P38919,Q9Y6M1,O00425,Q92522,Q9H0A0,P49916,Q00610
4	GO:0009891	positive regulation of biosynthetic process	Biological Process	34	Q86V81,Q9Y5B9,P38919,Q15717,P13639,P98179,Q9H0A0,P16403,P17096,Q92522,P17987,P13010,P24941,Q08211,P12956,Q12906,P35251,I3L397,Q8TED0,Q15061,P09874,P38159,P18085,Q15365,P61160,P11388,P78527,O94906,Q15185,Q7L0Y3,Q9H8H0,P22626,P11021,P06733
4	GO:0044249	cellular biosynthetic process	Biological Process	180	Q08211,Q9Y5B9,A0A087X270,Q08945,H7C5P4,P24941,P22626,P09874,O75367,P06733,P16403,Q9P0M6,P10599,P45973,P35251,Q15185,P32969,P63173,J3QQQ9,Q02878,Q9Y3U8,P83881,Q9NR30,P38159,P24928,P62318,P62306,P11177,P04406,P14618,B4DHM5,Q92621,H0Y4R1,A0A384N647,Q53SY7,Q04837,P17096,A4FS09,B4DDF5,B1AHA9,Q8NHX6,P49916,B4DUA2,C9JLU1,Q6E433,Q92522,A0A075B7D9,Q8TDG2,I3L1L3,Q5T6W2,O00422,P46087,A0A248RGE3,P68104,P0538…
4	GO:0044283	small molecule biosynthetic process	Biological Process	13	Q15185,P04406,P06733,P14618,B4DHM5,Q92621,B4DY32,P54886,B3KMB7,B4DU83,H0YIZ0,B4E1E0,Q00610
4	GO:1901576	organic substance biosynthetic process	Biological Process	184	Q08211,Q9Y5B9,A0A087X270,Q08945,H7C5P4,P24941,P22626,P09874,O75367,P06733,P16403,Q9P0M6,P10599,P45973,P35251,Q15185,P32969,P63173,J3QQQ9,Q02878,Q9Y3U8,P83881,Q9NR30,P38159,P24928,P62318,P62306,P11177,P04406,P14618,B4DHM5,Q92621,H0Y4R1,A0A384N647,Q53SY7,Q04837,P17096,A4FS09,B4DDF5,B1AHA9,Q8NHX6,P49916,B4DUA2,C9JLU1,Q6E433,Q92522,A0A075B7D9,Q8TDG2,I3L1L3,Q5T6W2,O00422,P46087,A0A248RGE3,P68104,P0538…
4	GO:0010605	negative regulation of macromolecule metabolic process	Biological Process	61	P22626,P09874,O75367,P06733,P16403,Q9P0M6,P10599,P45973,P24941,P35251,P05387,P32969,P08708,P23396,P62750,P63173,P30050,P60866,P42677,P62269,P62280,P18124,P36578,Q02878,Q9Y3U8,P38919,P61326,P62424,P42766,P62851,P83881,P26373,P62753,P49207,P25398,Q9Y5S9,P78527,A0A3G2LMJ8,Q9NZI8,Q5U071,P04406,S4R2Y4,P12956,Q12906,P17096,P13010,Q8TDG2,Q9Y6M1,O00425,Q08211,Q92522,Q9H0A0,Q15717,P63104,P38159,O00422,P24…
4	GO:0031324	negative regulation of cellular metabolic process	Biological Process	35	P22626,P09874,O75367,P06733,P16403,Q9P0M6,P10599,P45973,P24941,P35251,P78527,A0A3G2LMJ8,P04406,S4R2Y4,P12956,Q12906,P17096,P13010,Q8TDG2,P23396,Q9NZI8,P38919,Q9Y6M1,O00425,Q92522,Q9H0A0,P30048,P38159,O00422,Q15717,Q08211,Q13151,P49916,Q00610,Q9H444
4	GO:0045912	negative regulation of carbohydrate metabolic process	Biological Process	1	Q00610
4	GO:0062014	negative regulation of small molecule metabolic process	Biological Process	2	Q00610,P09874
4	GO:0120163	negative regulation of cold-induced thermogenesis	Biological Process	1	Q96HS1
4	GO:0010604	positive regulation of macromolecule metabolic process	Biological Process	50	Q86V81,Q9Y5B9,P23396,Q5U071,P06733,P38919,Q15717,P13639,P98179,Q9H0A0,P11021,P16403,P17096,Q92522,P10599,P17987,P13010,P24941,Q13243,Q9NW64,P24928,Q08211,P16104,O75367,Q9NR30,O75533,P12956,Q12906,P35251,I3L397,Q8TED0,Q15061,P09874,P38159,P18085,Q15365,P61160,P11388,P78527,O94906,Q9UMS4,Q13595,Q15185,Q7L0Y3,P31151,Q9NZI8,Q13151,Q9H8H0,P35579,P22626
4	GO:0031325	positive regulation of cellular metabolic process	Biological Process	45	Q86V81,Q9Y5B9,P06733,P38919,Q15717,P13639,P98179,Q9H0A0,P11021,P16403,P17096,Q92522,P23396,P10599,P17987,P13010,P24941,Q13243,Q9NW64,P24928,A0A024RBS1,Q15185,Q08211,P16104,P12956,Q12906,P35251,I3L397,Q8TED0,Q15061,P09874,P38159,P18085,Q15365,P61160,P11388,P78527,O94906,Q9UMS4,Q13595,Q7L0Y3,P31151,Q9H8H0,P35579,P22626
4	GO:0062013	positive regulation of small molecule metabolic process	Biological Process	1	P06733
4	GO:0031323	regulation of cellular metabolic process	Biological Process	83	Q86V81,P22626,P09874,O75367,P06733,P16403,Q9P0M6,P10599,P45973,P24941,P35251,P38159,P61326,O00422,J3QL05,Q13243,Q9Y5S9,Q96SB3,P78527,A0A3G2LMJ8,Q92621,B4DUA2,Q02878,Q6E433,P17096,Q92522,A0A075B7D9,Q8TDG2,I3L1L3,P24928,Q08211,Q5T6W2,P46087,P63173,P98179,A0A0F7L0Q8,Q59GC1,Q9BSH4,A0A024RBS1,Q9Y5B9,Q9NZI8,Q15397,P04406,P38919,Q15717,P13639,Q9H0A0,S4R2Y4,P12956,Q12906,P13010,P23396,Q9Y6M1,O00425,P1102…
4	GO:0060255	regulation of macromolecule metabolic process	Biological Process	107	Q86V81,P22626,P09874,O75367,P06733,P16403,Q9P0M6,P10599,P45973,P24941,P35251,P05387,P32969,P08708,P23396,P62750,P63173,P30050,P60866,P42677,P62269,P62280,P18124,P36578,Q02878,Q9Y3U8,P38919,P61326,P62424,P42766,P62851,P83881,P26373,P62753,P49207,P25398,Q9Y5S9,P38159,O00422,J3QL05,Q13243,Q96SB3,P78527,A0A3G2LMJ8,B4DUA2,Q6E433,P17096,Q92522,A0A075B7D9,Q8TDG2,I3L1L3,P24928,Q08211,Q5T6W2,P46087,P98179…
4	GO:0062012	regulation of small molecule metabolic process	Biological Process	4	Q92621,Q00610,P09874,P06733
4	GO:0080090	regulation of primary metabolic process	Biological Process	84	Q86V81,P22626,P09874,O75367,P06733,P16403,Q9P0M6,P10599,P45973,P24941,P35251,P38159,P61326,O00422,J3QL05,Q13243,Q9Y5S9,Q96SB3,P78527,A0A3G2LMJ8,Q92621,B4DUA2,Q02878,Q6E433,P17096,Q92522,A0A075B7D9,Q8TDG2,I3L1L3,P24928,Q08211,Q5T6W2,P46087,P63173,P98179,A0A0F7L0Q8,Q59GC1,Q9BSH4,A0A024RBS1,Q9Y5B9,Q9NZI8,Q15397,P04406,P38919,Q15717,P13639,Q9H0A0,S4R2Y4,P12956,Q12906,P13010,P23396,Q9Y6M1,O00425,P1102…
4	GO:0120161	regulation of cold-induced thermogenesis	Biological Process	1	Q96HS1
4	GO:0043414	macromolecule methylation	Biological Process	8	Q8IY81,P62318,Q08J23,P09874,O75367,P46087,Q7L0Y3,P16403
4	GO:0046148	pigment biosynthetic process	Biological Process	1	Q15374
4	GO:0006790	sulfur compound metabolic process	Biological Process	2	P11177,B4DFQ8
4	GO:0006082	organic acid metabolic process	Biological Process	33	Q15185,P11177,P04406,P14618,B4DHM5,Q13584,Q0QF37,Q0QF12,B8ZZ51,Q92621,H0YIC2,Q9H9J7,Q5JTZ9,C9J7S3,A8K5W7,Q9NVC0,U3KQ50,H0YHS6,B3KUZ8,B4DY32,P54886,B4E1E0,C9JIJ6,Q53SY7,B3KMB7,P12277,B4DRH6,H0YIZ0,F5H793,P13804,P38117,P06733,Q00610
4	GO:0006091	generation of precursor metabolites and energy	Biological Process	12	P04406,P14618,B4DHM5,P11177,Q13584,Q0QF37,Q0QF12,Q92621,P13804,P38117,P25705,P06733
4	GO:0006413	translational initiation	Biological Process	23	P05387,P32969,P08708,P23396,P62750,P63173,P30050,P60866,P42677,P62269,P62280,P18124,P36578,Q02878,Q9Y3U8,P62424,P42766,P62851,P83881,P26373,P62753,P49207,P25398
4	GO:0006575	cellular modified amino acid metabolic process	Biological Process	4	P12277,H0YIZ0,B4DNF8,B3KVA7
4	GO:0006725	cellular aromatic compound metabolic process	Biological Process	179	B4DEB2,Q86V81,Q08211,Q9Y5B9,A0A087X270,Q08945,H7C5P4,P24941,P22626,P09874,O75367,P06733,P16403,Q9P0M6,P10599,P45973,P35251,Q9H0A0,P05387,P32969,P08708,P23396,P62750,P63173,P30050,P60866,P42677,P62269,P62280,P18124,P36578,Q02878,Q9Y3U8,P38919,P61326,P62424,P42766,P62851,P83881,P26373,P62753,P49207,P25398,Q9Y5S9,Q9UMS4,Q6P2Q9,O94906,P62314,O75533,P38159,O00422,J3QL05,Q13243,P62318,P62306,E9PMI6,I3L…
4	GO:0006730	one-carbon metabolic process	Biological Process	2	H0YIZ0,Q1RMG2
4	GO:0006793	phosphorus metabolic process	Biological Process	34	Q96SB3,P78527,P11177,P04406,P14618,B4DHM5,Q92621,H0Y4R1,A0A384N647,Q12906,P24941,P25705,Q0QEN7,H7C086,B4DL14,O14578,P10599,O75367,P30048,A0A024RBS1,Q15185,P23396,B4E1E0,P12956,P13010,P11055,Q9Y623,B4DNF8,B3KVA7,P12277,P06733,P31151,P68104,P09874
4	GO:0072593	reactive oxygen species metabolic process	Biological Process	2	P30048,P18085
4	GO:0006805	xenobiotic metabolic process	Biological Process	1	Q15185
4	GO:0017144	drug metabolic process	Biological Process	22	P04406,P14618,B4DHM5,P11177,Q13584,Q0QF37,Q0QF12,Q92621,B4DFQ8,P12277,P25705,A0A384N647,Q0QEN7,H7C086,B4DL14,H0YIZ0,P30048,P11055,Q9Y623,P54886,P06733,P09874
4	GO:0042133	neurotransmitter metabolic process	Biological Process	1	H0YIZ0
4	GO:0042180	cellular ketone metabolic process	Biological Process	1	B4DU83
4	GO:0044255	cellular lipid metabolic process	Biological Process	4	Q15185,B4DRH6,P13804,P38117
4	GO:0044260	cellular macromolecule metabolic process	Biological Process	186	B4DEB2,Q86V81,Q08211,Q9Y5B9,A0A087X270,Q08945,H7C5P4,P24941,P22626,P09874,O75367,P06733,P16403,Q9P0M6,P10599,P45973,P35251,P05387,P32969,P08708,P23396,P62750,P63173,P30050,P60866,P42677,P62269,P62280,P18124,P36578,Q02878,Q9Y3U8,P38919,P61326,P62424,P42766,P62851,P83881,P26373,P62753,P49207,P25398,Q9Y5S9,Q9UMS4,Q8IY81,P11388,P12956,Q15185,P13010,P78527,E7ESD9,P16104,P49916,Q96SB3,A0A3G2LMJ8,J3QQQ9…
4	GO:0046483	heterocycle metabolic process	Biological Process	181	B4DEB2,Q86V81,Q08211,Q9Y5B9,A0A087X270,Q08945,H7C5P4,P24941,P22626,P09874,O75367,P06733,P16403,Q9P0M6,P10599,P45973,P35251,Q9H0A0,P05387,P32969,P08708,P23396,P62750,P63173,P30050,P60866,P42677,P62269,P62280,P18124,P36578,Q02878,Q9Y3U8,P38919,P61326,P62424,P42766,P62851,P83881,P26373,P62753,P49207,P25398,Q9Y5S9,Q9UMS4,Q6P2Q9,O94906,P62314,O75533,P38159,O00422,J3QL05,Q13243,P62318,P62306,E9PMI6,I3L…
4	GO:0051186	cofactor metabolic process	Biological Process	10	P11177,P04406,P14618,B4DHM5,Q92621,B4DFQ8,B4DU83,H0YIZ0,P30048,P06733
4	GO:0005975	carbohydrate metabolic process	Biological Process	11	P11177,P04406,P06733,P14618,B4DHM5,Q92621,Q00610,B8ZZ51,Q0QF37,E9PK47,B4DIW2
4	GO:0006099	tricarboxylic acid cycle	Biological Process	4	P11177,Q13584,Q0QF37,Q0QF12
4	GO:0006139	nucleobase-containing compound metabolic process	Biological Process	178	B4DEB2,Q86V81,Q08211,Q9Y5B9,A0A087X270,Q08945,H7C5P4,P24941,P22626,P09874,O75367,P06733,P16403,Q9P0M6,P10599,P45973,P35251,Q9H0A0,P05387,P32969,P08708,P23396,P62750,P63173,P30050,P60866,P42677,P62269,P62280,P18124,P36578,Q02878,Q9Y3U8,P38919,P61326,P62424,P42766,P62851,P83881,P26373,P62753,P49207,P25398,Q9Y5S9,Q9UMS4,Q6P2Q9,O94906,P62314,O75533,P38159,O00422,J3QL05,Q13243,P62318,P62306,E9PMI6,I3L…
4	GO:0006520	cellular amino acid metabolic process	Biological Process	17	H0YIC2,Q9H9J7,Q5JTZ9,C9J7S3,A8K5W7,Q9NVC0,U3KQ50,H0YHS6,B4DY32,P54886,B4E1E0,C9JIJ6,Q53SY7,B3KMB7,P12277,H0YIZ0,B3KUZ8
4	GO:0006629	lipid metabolic process	Biological Process	8	Q15185,B4DRH6,Q9UMS4,O75367,P13804,P38117,P02774,P25705
4	GO:0019538	protein metabolic process	Biological Process	134	Q9UMS4,Q96SB3,P78527,A0A3G2LMJ8,P32969,P63173,J3QQQ9,Q02878,Q9Y3U8,P83881,Q9NV06,A0A248RGE3,P68104,P05387,K7EJT5,S4R456,Q5JR95,C9JYQ9,Q9BTQ7,Q8NI62,Q76N57,P08708,P23396,P62750,Q96IR1,F8W7C6,I3L3P7,D6RG13,A0A2R8Y811,A0A2R8Y849,G3V203,P30050,A0A087WXM6,A0PJ62,B3KS36,P60866,E9PQD7,P42677,P62269,J3KMX5,H0YLP6,P62280,P18124,P36578,M0R3D6,M0R210,Q0VGL3,Q1JQ76,A0A2R8Y623,O15235,P62424,D3YTB1,E7EX53,D6RD…
4	GO:0005996	monosaccharide metabolic process	Biological Process	4	P11177,P04406,P06733,P14618
4	GO:0006766	vitamin metabolic process	Biological Process	1	P02774
4	GO:0018904	ether metabolic process	Biological Process	1	P10599
4	GO:0055086	nucleobase-containing small molecule metabolic process	Biological Process	18	P11177,P04406,P14618,B4DHM5,Q92621,H0Y4R1,A0A384N647,Q53SY7,P25705,Q15374,Q0QEN7,H7C086,B4DL14,B4E1E0,P11055,Q9Y623,P06733,P09874
4	GO:0043413	macromolecule glycosylation	Biological Process	1	Q96HX3
4	GO:0019637	organophosphate metabolic process	Biological Process	19	P11177,P04406,P14618,B4DHM5,Q92621,H0Y4R1,A0A384N647,P25705,Q0QEN7,H7C086,B4DL14,B4E1E0,P11055,Q9Y623,B4DNF8,B3KVA7,P12277,P06733,P09874
4	GO:0035383	thioester metabolic process	Biological Process	1	P11177
4	GO:0043170	macromolecule metabolic process	Biological Process	236	B4DEB2,Q86V81,Q08211,Q9Y5B9,A0A087X270,Q08945,H7C5P4,P24941,P22626,P09874,O75367,P06733,P16403,Q9P0M6,P10599,P45973,P35251,Q9H0A0,P05387,P32969,P08708,P23396,P62750,P63173,P30050,P60866,P42677,P62269,P62280,P18124,P36578,Q02878,Q9Y3U8,P38919,P61326,P62424,P42766,P62851,P83881,P26373,P62753,P49207,P25398,Q9Y5S9,Q9UMS4,Q6P2Q9,O94906,P62314,O75533,P38159,O00422,J3QL05,Q13243,P62318,P62306,E9PMI6,I3L…
4	GO:0046500	S-adenosylmethionine metabolic process	Biological Process	1	B4DFQ8
4	GO:1901135	carbohydrate derivative metabolic process	Biological Process	17	P11177,P04406,P14618,B4DHM5,Q92621,A0A384N647,Q96HX3,P25705,Q0QEN7,H7C086,B4DL14,B4E1E0,P11055,Q9Y623,P06733,Q00610,P09874
4	GO:1901360	organic cyclic compound metabolic process	Biological Process	182	B4DEB2,Q86V81,Q08211,Q9Y5B9,A0A087X270,Q08945,H7C5P4,P24941,P22626,P09874,O75367,P06733,P16403,Q9P0M6,P10599,P45973,P35251,Q9H0A0,P05387,P32969,P08708,P23396,P62750,P63173,P30050,P60866,P42677,P62269,P62280,P18124,P36578,Q02878,Q9Y3U8,P38919,P61326,P62424,P42766,P62851,P83881,P26373,P62753,P49207,P25398,Q9Y5S9,Q9UMS4,Q6P2Q9,O94906,P62314,O75533,P38159,O00422,J3QL05,Q13243,P62318,P62306,E9PMI6,I3L…
4	GO:1901568	fatty acid derivative metabolic process	Biological Process	1	Q15185
4	GO:1901615	organic hydroxy compound metabolic process	Biological Process	1	P02774
4	GO:0106106	cold-induced thermogenesis	Biological Process	1	Q96HS1
4	GO:0042267	natural killer cell mediated cytotoxicity	Biological Process	1	P68371
4	GO:0051709	regulation of killing of cells of other organism	Biological Process	1	P04406
4	GO:0051712	positive regulation of killing of cells of other organism	Biological Process	1	P04406
4	GO:0051883	killing of cells in other organism involved in symbiotic interaction	Biological Process	1	P04406
4	GO:0002260	lymphocyte homeostasis	Biological Process	1	P62753
4	GO:0002562	somatic diversification of immune receptors via germline recombination within a single locus	Biological Process	1	P78527
4	GO:0002568	somatic diversification of T cell receptor genes	Biological Process	1	P78527
4	GO:0016445	somatic diversification of immunoglobulins	Biological Process	1	P78527
4	GO:0002263	cell activation involved in immune response	Biological Process	11	P62753,P68104,P68371,P12956,P61026,P14618,P31151,P13639,P61160,Q86YZ3,P13010
4	GO:0002433	immune response-regulating cell surface receptor signaling pathway involved in phagocytosis	Biological Process	3	O15144,P61160,O15143
4	GO:0002443	leukocyte mediated immunity	Biological Process	11	Q9NR30,P68371,P68104,P12956,P61026,P14618,P31151,P13639,P61160,Q86YZ3,P13010
4	GO:0002697	regulation of immune effector process	Biological Process	4	A0A3G2LMJ8,P78527,Q9NR30,Q08211
4	GO:0002698	negative regulation of immune effector process	Biological Process	2	A0A3G2LMJ8,P78527
4	GO:0002699	positive regulation of immune effector process	Biological Process	1	Q9NR30
4	GO:0006956	complement activation	Biological Process	1	A0A3G2LMJ8
4	GO:0043299	leukocyte degranulation	Biological Process	10	P68104,P68371,P12956,P61026,P14618,P31151,P13639,P61160,Q86YZ3,P13010
4	GO:0051607	defense response to virus	Biological Process	3	Q08211,Q9NR30,Q12906
4	GO:0002218	activation of innate immune response	Biological Process	3	P12956,P13010,P78527
4	GO:0002757	immune response-activating signal transduction	Biological Process	4	P23396,O15144,P61160,O15143
4	GO:0034101	erythrocyte homeostasis	Biological Process	3	P62753,Q5HYL6,P08708
4	GO:0002367	cytokine production involved in immune response	Biological Process	1	Q9NR30
4	GO:0002377	immunoglobulin production	Biological Process	1	P78527
4	GO:0002700	regulation of production of molecular mediator of immune response	Biological Process	2	P78527,Q9NR30
4	GO:0002701	negative regulation of production of molecular mediator of immune response	Biological Process	1	P78527
4	GO:0002702	positive regulation of production of molecular mediator of immune response	Biological Process	1	Q9NR30
4	GO:0048534	hematopoietic or lymphoid organ development	Biological Process	11	Q15050,P13639,P11388,P78527,P30048,P35579,P12814,P09874,P62753,Q5HYL6,P13010
4	GO:0002685	regulation of leukocyte migration	Biological Process	1	P31151
4	GO:0002694	regulation of leukocyte activation	Biological Process	1	P23396
4	GO:0050776	regulation of immune response	Biological Process	10	A0A3G2LMJ8,P12956,P13010,P78527,Q9NR30,P23396,O15144,P61160,O15143,Q08211
4	GO:0050777	negative regulation of immune response	Biological Process	1	A0A3G2LMJ8
4	GO:0002687	positive regulation of leukocyte migration	Biological Process	1	P31151
4	GO:0002696	positive regulation of leukocyte activation	Biological Process	1	P23396
4	GO:0050778	positive regulation of immune response	Biological Process	10	A0A3G2LMJ8,P12956,P13010,P78527,Q9NR30,P23396,O15144,P61160,O15143,Q08211
4	GO:0002437	inflammatory response to antigenic stimulus	Biological Process	1	Q5U071
4	GO:0006959	humoral immune response	Biological Process	3	A0A3G2LMJ8,P31151,P04406
4	GO:0045087	innate immune response	Biological Process	10	P12956,P13010,P78527,P68371,Q08211,P04406,P61160,O75369,Q9NR30,P31151
4	GO:0002504	antigen processing and presentation of peptide or polysaccharide antigen via MHC class II	Biological Process	2	P09496,Q00610
4	GO:0019884	antigen processing and presentation of exogenous antigen	Biological Process	2	P09496,Q00610
4	GO:0048002	antigen processing and presentation of peptide antigen	Biological Process	2	P09496,Q00610
4	GO:0002274	myeloid leukocyte activation	Biological Process	10	P68104,P68371,P12956,P61026,P14618,P31151,P13639,P61160,Q86YZ3,P13010
4	GO:0002366	leukocyte activation involved in immune response	Biological Process	11	P62753,P68104,P68371,P12956,P61026,P14618,P31151,P13639,P61160,Q86YZ3,P13010
4	GO:0046649	lymphocyte activation	Biological Process	4	P35579,P62753,P78527,P23396
4	GO:0030595	leukocyte chemotaxis	Biological Process	1	P31151
4	GO:0071674	mononuclear cell migration	Biological Process	1	P31151
4	GO:0072676	lymphocyte migration	Biological Process	1	P31151
4	GO:0097529	myeloid leukocyte migration	Biological Process	1	P31151
4	GO:0001558	regulation of cell growth	Biological Process	3	Q96SB3,P06733,Q16643
4	GO:0030307	positive regulation of cell growth	Biological Process	1	Q16643
4	GO:0030308	negative regulation of cell growth	Biological Process	2	P06733,Q96SB3
4	GO:0048588	developmental cell growth	Biological Process	1	Q16643
4	GO:0048638	regulation of developmental growth	Biological Process	2	Q16643,P78527
4	GO:0048639	positive regulation of developmental growth	Biological Process	2	Q16643,P78527
4	GO:0001832	blastocyst growth	Biological Process	1	Q9UMS4
4	GO:0042246	tissue regeneration	Biological Process	1	P14618
4	GO:0060560	developmental growth involved in morphogenesis	Biological Process	1	Q16643
4	GO:0007612	learning	Biological Process	4	P38919,P61160,P18085,Q96SB3
4	GO:0007617	mating behavior	Biological Process	1	Q96SB3
4	GO:0048146	positive regulation of fibroblast proliferation	Biological Process	2	Q08211,P78527
4	GO:0070665	positive regulation of leukocyte proliferation	Biological Process	1	P23396
4	GO:0048147	negative regulation of fibroblast proliferation	Biological Process	1	P50402
4	GO:0050680	negative regulation of epithelial cell proliferation	Biological Process	1	P25705
4	GO:0048659	smooth muscle cell proliferation	Biological Process	3	P12956,P13010,P78527
4	GO:0048145	regulation of fibroblast proliferation	Biological Process	3	Q08211,P78527,P50402
4	GO:0048660	regulation of smooth muscle cell proliferation	Biological Process	3	P12956,P13010,P78527
4	GO:0050678	regulation of epithelial cell proliferation	Biological Process	2	P25705,P78527
4	GO:0070663	regulation of leukocyte proliferation	Biological Process	1	P23396
4	GO:0072091	regulation of stem cell proliferation	Biological Process	1	Q5U071
4	GO:0001935	endothelial cell proliferation	Biological Process	1	P25705
4	GO:0007405	neuroblast proliferation	Biological Process	1	P61026
4	GO:0021846	cell proliferation in forebrain	Biological Process	1	Q9NZI8
4	GO:0032943	mononuclear cell proliferation	Biological Process	2	P62753,P23396
4	GO:0051304	chromosome separation	Biological Process	1	P11388
4	GO:0051983	regulation of chromosome segregation	Biological Process	1	O75367
4	GO:0051984	positive regulation of chromosome segregation	Biological Process	1	O75367
4	GO:0098813	nuclear chromosome segregation	Biological Process	7	P23258,P11388,B4DXN3,Q15050,Q9H444,P61160,O75367
4	GO:0000226	microtubule cytoskeleton organization	Biological Process	9	P35579,P23258,A0A024RC67,P24941,Q9H444,P23396,Q00610,P04406,P68371
4	GO:0007018	microtubule-based movement	Biological Process	3	P61160,A0A2U3TZL8,A0A384P5W4
4	GO:0031023	microtubule organizing center organization	Biological Process	2	P24941,Q9H444
4	GO:0032886	regulation of microtubule-based process	Biological Process	3	Q9H444,P23396,Q00610
4	GO:0007093	mitotic cell cycle checkpoint	Biological Process	4	P24941,P11388,P78527,P62753
4	GO:0031570	DNA integrity checkpoint	Biological Process	5	P16104,P24941,P11388,Q9UMS4,P78527
4	GO:0033313	meiotic cell cycle checkpoint	Biological Process	1	Q08J23
4	GO:0072395	signal transduction involved in cell cycle checkpoint	Biological Process	3	P24941,Q9UMS4,P78527
4	GO:0030168	platelet activation	Biological Process	3	P35579,P19105,P63104
4	GO:0050865	regulation of cell activation	Biological Process	1	P23396
4	GO:0050867	positive regulation of cell activation	Biological Process	1	P23396
4	GO:0042026	protein refolding	Biological Process	3	B7Z597,O60884,P11021
4	GO:0006458	'de novo' protein folding	Biological Process	2	Q15185,P11021
4	GO:0034975	protein folding in endoplasmic reticulum	Biological Process	1	P11021
4	GO:0061077	chaperone-mediated protein folding	Biological Process	2	Q15185,P11021
4	GO:1903332	regulation of protein folding	Biological Process	1	P11021
4	GO:0002764	immune response-regulating signaling pathway	Biological Process	4	P23396,O15144,P61160,O15143
4	GO:0035556	intracellular signal transduction	Biological Process	24	P24941,Q9BRL5,Q96SB3,P78527,O14958,P16615,P62753,P61026,P62330,Q9NR30,P23396,P10599,P31151,Q9UMS4,O43707,Q9Y5B9,Q15050,Q08945,P46087,Q9NWT1,P06733,P09874,B2RE34,O14578
4	GO:0006984	ER-nucleus signaling pathway	Biological Process	2	P11021,P16615
4	GO:0007166	cell surface receptor signaling pathway	Biological Process	19	P18085,P09874,Q9GZL7,P35579,O14654,P24928,Q8TDG2,P63104,P23396,P11021,O43707,P22626,P17987,O15144,P61160,O15143,Q00610,P50402,P38919
4	GO:0007186	G protein-coupled receptor signaling pathway	Biological Process	1	Q96SB3
4	GO:0009755	hormone-mediated signaling pathway	Biological Process	1	P09874
4	GO:0009966	regulation of signal transduction	Biological Process	22	Q8TDG2,Q9NWT1,P09874,P23396,P11021,P62330,Q9NR30,P10599,O14958,P50402,P31151,P38919,P63104,P05141,O43707,Q9Y5B9,Q15050,Q08945,P46087,P24941,P06733,Q96SB3
4	GO:0009967	positive regulation of signal transduction	Biological Process	7	P23396,P09874,Q9NR30,P10599,P31151,P63104,O43707
4	GO:0009968	negative regulation of signal transduction	Biological Process	7	P11021,O14958,P50402,P38919,P05141,P06733,Q9NWT1
4	GO:0023014	signal transduction by protein phosphorylation	Biological Process	2	P23396,P31151
4	GO:0023019	signal transduction involved in regulation of gene expression	Biological Process	1	P09874
4	GO:0030522	intracellular receptor signaling pathway	Biological Process	2	P09874,O43707
4	GO:0030968	endoplasmic reticulum unfolded protein response	Biological Process	2	Q9Y5M8,P11021
4	GO:0060395	SMAD protein signal transduction	Biological Process	1	P09874
4	GO:0097190	apoptotic signaling pathway	Biological Process	6	P78527,P63104,P05141,P23396,P06733,P09874
4	GO:0030048	actin filament-based movement	Biological Process	9	P08590,P14649,P63316,P11055,Q9Y623,O43707,P35580,P35579,Q7Z406
4	GO:0051270	regulation of cellular component movement	Biological Process	8	P31151,O43707,P11021,P63316,P25705,P12814,P62330,P16615
4	GO:0051271	negative regulation of cellular component movement	Biological Process	2	O43707,P12814
4	GO:0051272	positive regulation of cellular component movement	Biological Process	5	P31151,O43707,P11021,P25705,P62330
4	GO:0097485	neuron projection guidance	Biological Process	1	P35580
4	GO:0000768	syncytium formation by plasma membrane fusion	Biological Process	1	P35579
4	GO:0000278	mitotic cell cycle	Biological Process	16	P23258,P62753,P24941,P68371,O14578,P35580,Q9H444,B4DXN3,Q15050,O75531,P50402,Q96SB3,O75367,P11388,Q00610,P78527
4	GO:0051726	regulation of cell cycle	Biological Process	18	P16104,P24941,Q96SB3,P62753,P68371,P23258,Q9H444,A0A024RC67,O14578,Q08J23,O75367,P11388,Q00610,P45973,Q9UMS4,P78527,Q13243,H7C1M2
4	GO:0045786	negative regulation of cell cycle	Biological Process	10	P16104,P24941,Q96SB3,P62753,Q08J23,P11388,P45973,Q9UMS4,P78527,O75367
4	GO:0045787	positive regulation of cell cycle	Biological Process	3	P24941,O14578,O75367
4	GO:0010643	cell communication by chemical coupling	Biological Process	1	Q16643
4	GO:0010644	cell communication by electrical coupling	Biological Process	2	O14958,Q16643
4	GO:0010646	regulation of cell communication	Biological Process	25	P05141,P12236,Q8TDG2,Q9NWT1,O14958,P09874,P23396,P11021,Q16643,P62330,Q9NR30,Q96SB3,P10599,P50402,P31151,P38919,P63104,O43707,Q9Y5B9,Q15050,Q08945,P46087,P24941,P16615,P06733
4	GO:0010647	positive regulation of cell communication	Biological Process	7	P23396,P09874,Q9NR30,P10599,P31151,P63104,O43707
4	GO:0010648	negative regulation of cell communication	Biological Process	7	Q9NWT1,P11021,O14958,P50402,P38919,P05141,P06733
4	GO:0019226	transmission of nerve impulse	Biological Process	1	Q7Z406
4	GO:0031668	cellular response to extracellular stimulus	Biological Process	2	Q96SB3,P11021
4	GO:0086065	cell communication involved in cardiac conduction	Biological Process	1	O14958
4	GO:0030010	establishment of cell polarity	Biological Process	3	P35579,P61026,P62330
4	GO:0045196	establishment or maintenance of neuroblast polarity	Biological Process	1	P61026
4	GO:0061245	establishment or maintenance of bipolar cell polarity	Biological Process	1	P18085
4	GO:0012501	programmed cell death	Biological Process	24	P09874,P23396,A0A386NC25,P12236,P62753,P18085,P63104,P30048,P78527,P11021,O43707,P12814,P11388,P62330,O00422,Q9Y3A2,P04406,O14578,Q96HS1,Q08211,P05141,P06733,P17987,P14618
4	GO:0070265	necrotic cell death	Biological Process	1	Q96HS1
4	GO:0010941	regulation of cell death	Biological Process	19	P18085,P62753,P63104,P30048,P78527,P11021,P23396,O43707,P12814,O00422,P11388,Q9Y3A2,P04406,Q9H444,P05141,P09874,P10599,P06733,P17987
4	GO:0010942	positive regulation of cell death	Biological Process	9	P62753,O00422,P11388,P78527,Q9Y3A2,P04406,P63104,P09874,P23396
4	GO:0036473	cell death in response to oxidative stress	Biological Process	2	P10599,P09874
4	GO:0060548	negative regulation of cell death	Biological Process	10	P18085,P62753,P63104,P30048,P78527,P11021,P05141,Q9H444,P10599,P06733
4	GO:0070997	neuron death	Biological Process	5	P04406,P11021,O14578,Q9H444,P09874
4	GO:0008038	neuron recognition	Biological Process	1	P63104
4	GO:0009988	cell-cell recognition	Biological Process	1	P17987
4	GO:0006325	chromatin organization	Biological Process	11	O75367,P16104,P16403,Q9P0M6,H0YHC3,Q92522,Q9Y5B9,P17096,P24941,B4DZC0,Q96KK5
4	GO:0006996	organelle organization	Biological Process	90	P62750,P30050,Q02878,A8K800,Q15050,P46087,P42677,A0A0B4J2E5,B0AZQ4,P23258,P35579,P04406,P68371,P11388,P09874,P12956,Q15185,P13010,P78527,E7ESD9,A0A2U3TZL8,A0A024RC67,O75367,P16104,P16403,Q9P0M6,H0YHC3,Q92522,O43707,P12814,C9JAM8,B1AK87,A8K0T9,C9JUG7,E9PLJ3,F6RFD5,Q96SB3,Q5HYL6,K7EJ44,O75369,Q59H95,Q04837,Q5U071,E9PCY5,B9EG90,P17096,Q96KK5,Q9Y5B9,P12236,Q9H444,Q9NY12,P35251,P49916,H0Y2W2,P30048,Q1…
4	GO:0010256	endomembrane system organization	Biological Process	9	P35580,P35579,O14578,O75531,P50402,Q9H444,P16615,P61026,P63104
4	GO:0022607	cellular component assembly	Biological Process	69	P62750,P30050,Q02878,A8K800,Q15050,P46087,P42677,A0A0B4J2E5,Q9UMS4,Q6P2Q9,O94906,P62314,O75533,P62318,P62306,E9PMI6,I3L2C7,P55769,A0A2U3TZL8,A0A024R1X8,O75367,P16104,P16403,Q9P0M6,H0YHC3,Q92522,O43707,P12814,C9JAM8,B1AK87,A8K0T9,C9JUG7,P09874,P38159,Q13243,Q15185,P35580,P23258,P17987,P24941,F8WDD7,O15144,P61160,Q08211,Q16643,P62330,P23396,B4DJT7,B4DXW1,B2R4D5,O15143,A0A1W2PNV4,P63173,P17096,Q9H44…
4	GO:0022411	cellular component disassembly	Biological Process	17	B1AK87,A8K0T9,C9JUG7,E9PLJ3,F6RFD5,Q96SB3,Q9Y5B9,P17096,P11388,I3L2G1,I3L397,Q5HYL6,O15235,P82921,Q9NWU5,Q96EL2,Q96A35
4	GO:0030030	cell projection organization	Biological Process	12	P35580,P61026,P61160,O15144,P11021,Q96SB3,P35579,Q16643,P62330,P18085,P68371,P23258
4	GO:0032535	regulation of cellular component size	Biological Process	16	B1AK87,A8K0T9,C9JUG7,E9PMI6,O14578,Q16643,F6RFD5,P62330,B4DXW1,F8WDD7,B2R4D5,O15144,P61160,O15143,A0A1W2PNV4,Q5HYL6
4	GO:0032989	cellular component morphogenesis	Biological Process	13	O75369,P61026,P35580,P35579,Q7Z406,P12814,O14958,P11055,Q16643,P61160,Q04837,O43707,O15144
4	GO:0034330	cell junction organization	Biological Process	4	A0A024R1X8,P12814,O43707,P62330
4	GO:0043933	protein-containing complex subunit organization	Biological Process	66	P62750,P30050,Q02878,A8K800,Q15050,P46087,P42677,A0A0B4J2E5,Q9UMS4,Q6P2Q9,O94906,P62314,O75533,P62318,P62306,E9PMI6,I3L2C7,P55769,O75367,P16104,P16403,Q9P0M6,H0YHC3,Q92522,B1AK87,A8K0T9,C9JUG7,E9PLJ3,F6RFD5,Q96SB3,P09874,Q9Y5B9,P17096,P38159,Q13243,Q15185,P23258,P17987,F8WDD7,O15144,Q08211,Q16643,P62330,P23396,B4DXW1,B2R4D5,P61160,O15143,A0A1W2PNV4,P63173,I3L2G1,Q9NWU5,Q15717,Q9H444,I3L397,P09496…
4	GO:0043954	cellular component maintenance	Biological Process	1	P62330
4	GO:0045229	external encapsulating structure organization	Biological Process	1	Q86YZ3
4	GO:0050808	synapse organization	Biological Process	6	Q16643,P61160,P63104,P35580,P18085,P62330
4	GO:0051128	regulation of cellular component organization	Biological Process	40	Q96SB3,B1AK87,A8K0T9,C9JUG7,P09874,O14578,P35580,P35579,Q7Z406,O15144,Q9H444,P11021,P06733,Q16643,F6RFD5,P62330,P23396,P16403,P17096,Q92522,P13010,Q9H0A0,P17987,O75367,B4DXW1,F8WDD7,B2R4D5,P61160,O15143,A0A1W2PNV4,I3L397,O43707,Q5HYL6,Q00610,P63104,P49916,P18085,P05141,P22626,P11388
4	GO:0051129	negative regulation of cellular component organization	Biological Process	17	B1AK87,A8K0T9,C9JUG7,P16403,P17096,Q92522,Q9H0A0,O75367,P62330,Q5HYL6,P49916,O43707,P05141,Q9H444,P09874,P13010,P11388
4	GO:0051130	positive regulation of cellular component organization	Biological Process	20	P09874,O15144,P11021,F6RFD5,P62330,P23396,P17987,P13010,O75367,B4DXW1,F8WDD7,B2R4D5,P61160,O15143,A0A1W2PNV4,Q16643,I3L397,O43707,P63104,P22626
4	GO:0061024	membrane organization	Biological Process	13	P35580,P35579,O75531,P50402,Q9H444,P16615,P25705,P63104,P05141,O15144,P61160,P09496,Q00610
4	GO:0097435	supramolecular fiber organization	Biological Process	26	O43707,P12814,C9JAM8,B1AK87,A8K0T9,C9JUG7,E9PLJ3,F6RFD5,Q96SB3,Q16643,P23258,O14578,F8WDD7,O15144,P62330,P23396,B4DJT7,B4DXW1,B2R4D5,P61160,O15143,A0A1W2PNV4,O14958,P11055,Q5HYL6,P35580
4	GO:0099172	presynapse organization	Biological Process	1	P62330
4	GO:0099173	postsynapse organization	Biological Process	5	Q16643,P61160,P35580,P18085,P62330
4	GO:0006342	chromatin silencing	Biological Process	3	P16403,P17096,Q92522
4	GO:0016441	posttranscriptional gene silencing	Biological Process	5	Q08211,P22626,P24928,Q92621,Q15717
4	GO:0031047	gene silencing by RNA	Biological Process	5	Q08211,P22626,P24928,Q92621,Q15717
4	GO:0060968	regulation of gene silencing	Biological Process	8	P16403,P17096,Q92522,P24928,Q92621,Q15717,Q08211,P24941
4	GO:0060969	negative regulation of gene silencing	Biological Process	4	P16403,P17096,Q92522,Q15717
4	GO:0045454	cell redox homeostasis	Biological Process	3	V9HW35,P10599,P30048
4	GO:0006884	cell volume homeostasis	Biological Process	1	E9PMI6
4	GO:0032201	telomere maintenance via semi-conservative replication	Biological Process	1	P35251
4	GO:0055082	cellular chemical homeostasis	Biological Process	3	O14958,P16615,P12277
4	GO:0000910	cytokinesis	Biological Process	7	P35580,Q9H444,O14578,A0A2U3TZL8,A0A024RC67,P35579,P61160
4	GO:0007050	cell cycle arrest	Biological Process	2	P24941,Q96SB3
4	GO:0007051	spindle organization	Biological Process	5	P35579,P23258,P23396,Q00610,Q9H444
4	GO:0007062	sister chromatid cohesion	Biological Process	1	O75367
4	GO:0007098	centrosome cycle	Biological Process	2	P24941,Q9H444
4	GO:0007099	centriole replication	Biological Process	1	P24941
4	GO:0010564	regulation of cell cycle process	Biological Process	11	P24941,Q96SB3,P68371,P23258,Q9H444,A0A024RC67,O14578,O75367,Q00610,P45973,P78527
4	GO:0010948	negative regulation of cell cycle process	Biological Process	4	P24941,P45973,P78527,O75367
4	GO:0032506	cytokinetic process	Biological Process	3	A0A2U3TZL8,Q9H444,P35579
4	GO:0044770	cell cycle phase transition	Biological Process	9	P62753,P24941,P68371,P23258,O14578,Q96SB3,Q9H444,P78527,O75367
4	GO:0034086	maintenance of sister chromatid cohesion	Biological Process	1	O75367
4	GO:0044786	cell cycle DNA replication	Biological Process	1	P35251
4	GO:0044837	actomyosin contractile ring organization	Biological Process	1	A0A2U3TZL8
4	GO:0045023	G0 to G1 transition	Biological Process	1	P45973
4	GO:0051298	centrosome duplication	Biological Process	2	P24941,Q9H444
4	GO:0051305	chromosome movement towards spindle pole	Biological Process	1	P61160
4	GO:0051653	spindle localization	Biological Process	2	P35579,P61160
4	GO:0090068	positive regulation of cell cycle process	Biological Process	3	P24941,O14578,O75367
4	GO:1903047	mitotic cell cycle process	Biological Process	16	P23258,P62753,P24941,P68371,O14578,P35580,Q9H444,B4DXN3,Q15050,O75531,P50402,Q96SB3,O75367,P11388,Q00610,P78527
4	GO:0140056	organelle localization by membrane tethering	Biological Process	3	P61026,P68371,P23258
4	GO:0007143	female meiotic nuclear division	Biological Process	1	P11388
4	GO:0007281	germ cell development	Biological Process	2	Q08J23,P62753
4	GO:0048515	spermatid differentiation	Biological Process	1	Q08J23
4	GO:0051014	actin filament severing	Biological Process	3	P35579,F6RFD5,Q59H95
4	GO:0030036	actin cytoskeleton organization	Biological Process	29	A0A2U3TZL8,O43707,P12814,C9JAM8,B1AK87,A8K0T9,C9JUG7,E9PLJ3,F6RFD5,Q96SB3,Q16643,O14578,F8WDD7,O15144,P62330,P35580,P35579,Q7Z406,B4DXW1,B2R4D5,P61160,O15143,A0A1W2PNV4,O14958,P11055,Q5HYL6,K7EJ44,O75369,Q59H95
4	GO:0032970	regulation of actin filament-based process	Biological Process	18	B1AK87,A8K0T9,C9JUG7,O14578,Q16643,F6RFD5,P62330,P63316,B4DXW1,F8WDD7,B2R4D5,O15144,P61160,O15143,A0A1W2PNV4,Q5HYL6,P16615,P35579
4	GO:0023061	signal release	Biological Process	3	P05141,P12236,P16615
4	GO:0006887	exocytosis	Biological Process	15	O43707,P12814,P61026,P68104,P68371,P12956,P14618,P31151,P13639,P61160,Q86YZ3,P13010,P35579,P16615,P35580
4	GO:0009306	protein secretion	Biological Process	7	P05141,P12236,Q08211,P35580,P62330,P04406,P61026
4	GO:1903530	regulation of secretion by cell	Biological Process	8	P05141,P12236,P61026,Q08211,P35580,P62330,P04406,P16615
4	GO:1903532	positive regulation of secretion by cell	Biological Process	4	Q08211,P35580,P62330,P04406
4	GO:0045104	intermediate filament cytoskeleton organization	Biological Process	1	B4DJT7
4	GO:0045597	positive regulation of cell differentiation	Biological Process	9	P11021,O75367,Q9P0M6,Q9UMS4,Q16643,P13010,P61160,O15144,P09874
4	GO:0051284	positive regulation of sequestering of calcium ion	Biological Process	1	O14958
4	GO:0051781	positive regulation of cell division	Biological Process	1	O14578
4	GO:0060148	positive regulation of posttranscriptional gene silencing	Biological Process	1	Q08211
4	GO:0090343	positive regulation of cell aging	Biological Process	1	P17096
4	GO:2001022	positive regulation of response to DNA damage stimulus	Biological Process	6	Q08211,P23396,P16104,P09874,P61160,P78527
4	GO:0007162	negative regulation of cell adhesion	Biological Process	1	O43707
4	GO:0010523	negative regulation of calcium ion transport into cytosol	Biological Process	1	O14958
4	GO:0045596	negative regulation of cell differentiation	Biological Process	2	O43707,P62330
4	GO:0051283	negative regulation of sequestering of calcium ion	Biological Process	1	O14958
4	GO:0090288	negative regulation of cellular response to growth factor stimulus	Biological Process	1	P11021
4	GO:0090344	negative regulation of cell aging	Biological Process	1	P78527
4	GO:1900038	negative regulation of cellular response to hypoxia	Biological Process	1	P06733
4	GO:1900408	negative regulation of cellular response to oxidative stress	Biological Process	1	P10599
4	GO:1901380	negative regulation of potassium ion transmembrane transport	Biological Process	1	O14958
4	GO:1903573	negative regulation of response to endoplasmic reticulum stress	Biological Process	1	P11021
4	GO:1903919	negative regulation of actin filament severing	Biological Process	1	P35579
4	GO:2001021	negative regulation of response to DNA damage stimulus	Biological Process	1	P23396
4	GO:2001039	negative regulation of cellular response to drug	Biological Process	1	P10599
4	GO:0007569	cell aging	Biological Process	3	P16104,P17096,P78527
4	GO:0010623	programmed cell death involved in cell development	Biological Process	1	P78527
4	GO:0030154	cell differentiation	Biological Process	41	Q08211,Q9NR30,P38159,Q86V81,Q00610,P35580,Q15050,P13639,P11388,P78527,O75369,Q08J23,P61026,P35579,P63104,P11021,Q96SB3,P62753,P30048,P31151,P12814,P09874,P31942,Q86YZ3,P16615,P50402,O14958,P11055,O75367,Q9P0M6,Q9UMS4,Q16643,O14578,Q5HYL6,Q5U071,P13010,P18085,P62330,P61160,O43707,O15144
4	GO:0045165	cell fate commitment	Biological Process	2	P78527,P61026
4	GO:0048468	cell development	Biological Process	24	O75369,Q08J23,P61026,P35580,P63104,P11021,Q96SB3,P62753,P35579,P12814,P16615,P78527,O14958,P11055,Q9UMS4,Q16643,Q5HYL6,Q5U071,P13010,P18085,P62330,P61160,O43707,O15144
4	GO:0003254	regulation of membrane depolarization	Biological Process	1	P09874
4	GO:0010522	regulation of calcium ion transport into cytosol	Biological Process	1	O14958
4	GO:0045595	regulation of cell differentiation	Biological Process	12	P11021,O75367,Q9P0M6,Q9UMS4,Q16643,Q5U071,P13010,P62330,P61160,O43707,O15144,P09874
4	GO:0051282	regulation of sequestering of calcium ion	Biological Process	1	O14958
4	GO:0051302	regulation of cell division	Biological Process	2	A0A024RC67,O14578
4	GO:0060627	regulation of vesicle-mediated transport	Biological Process	4	P61026,P62330,O43707,P16615
4	GO:0080135	regulation of cellular response to stress	Biological Process	12	P23396,Q08211,P16104,Q15185,Q92621,P10599,P06733,P09874,P11021,P61160,P78527,P17096
4	GO:0090287	regulation of cellular response to growth factor stimulus	Biological Process	1	P11021
4	GO:0090342	regulation of cell aging	Biological Process	2	P78527,P17096
4	GO:1901379	regulation of potassium ion transmembrane transport	Biological Process	1	O14958
4	GO:2001038	regulation of cellular response to drug	Biological Process	1	P10599
4	GO:0008356	asymmetric cell division	Biological Process	2	P61026,P61160
4	GO:0017145	stem cell division	Biological Process	1	P61026
4	GO:0040016	embryonic cleavage	Biological Process	1	P11388
4	GO:0032507	maintenance of protein location in cell	Biological Process	4	O75369,P11021,P10599,Q16643
4	GO:0033554	cellular response to stress	Biological Process	33	B4DEB2,P16104,P09874,P49916,P23396,B5BUB1,Q9Y5B9,Q08945,P24941,M0R0Y3,E7ESD9,Q9UMS4,P35251,P24928,P17096,P13010,P78527,P12956,P11388,P45973,A0A0C4DFX7,P11021,Q9Y5M8,Q9NZI8,P16615,P30048,P13639,Q08211,Q15185,Q92621,P10599,P06733,P61160
4	GO:0070887	cellular response to chemical stimulus	Biological Process	37	Q15185,Q9Y5M8,P11021,P09874,O14654,P24928,P31151,P63104,P61026,P14618,Q13243,P78527,O43707,P16615,P30048,Q9NW64,P22626,P17987,P61160,P23396,Q6P2Q9,O14958,Q96SB3,P04406,O75369,P38159,Q08211,P50402,P68104,P13010,P24941,P38919,P10599,P06733,P62330,P13639,P05141
4	GO:0071216	cellular response to biotic stimulus	Biological Process	2	P11021,Q6P2Q9
4	GO:0104004	cellular response to environmental stimulus	Biological Process	5	P09874,P12956,P13010,P16104,P11021
4	GO:0006914	autophagy	Biological Process	5	Q96HS1,Q9H444,P04406,P68104,Q00610
4	GO:0071805	potassium ion transmembrane transport	Biological Process	1	O14958
4	GO:0006921	cellular component disassembly involved in execution phase of apoptosis	Biological Process	1	P11388
4	GO:1900117	regulation of execution phase of apoptosis	Biological Process	1	P23396
4	GO:1900119	positive regulation of execution phase of apoptosis	Biological Process	1	P23396
4	GO:0006904	vesicle docking involved in exocytosis	Biological Process	1	P61026
4	GO:0001893	maternal placenta development	Biological Process	1	P30048
4	GO:0007548	sex differentiation	Biological Process	1	P11021
4	GO:0035234	ectopic germ cell programmed cell death	Biological Process	1	P78527
4	GO:0045137	development of primary sexual characteristics	Biological Process	1	P11021
4	GO:0048608	reproductive structure development	Biological Process	3	P11021,P62753,P30048
4	GO:0007338	single fertilization	Biological Process	2	P17987,P55769
4	GO:0001554	luteolysis	Biological Process	1	P11021
4	GO:0007339	binding of sperm to zona pellucida	Biological Process	1	P17987
4	GO:0007565	female pregnancy	Biological Process	1	P30048
4	GO:0022605	mammalian oogenesis stage	Biological Process	1	P62753
4	GO:0060135	maternal process involved in female pregnancy	Biological Process	1	P30048
4	GO:0000212	meiotic spindle organization	Biological Process	2	P35579,P23258
4	GO:0007131	reciprocal meiotic recombination	Biological Process	1	P11388
4	GO:0016344	meiotic chromosome movement towards spindle pole	Biological Process	1	P61160
4	GO:0033206	meiotic cytokinesis	Biological Process	1	P61160
4	GO:0045132	meiotic chromosome segregation	Biological Process	2	P11388,P61160
4	GO:0051295	establishment of meiotic spindle localization	Biological Process	1	P35579
4	GO:0051307	meiotic chromosome separation	Biological Process	1	P11388
4	GO:0061982	meiosis I cell cycle process	Biological Process	1	P11388
4	GO:0140013	meiotic nuclear division	Biological Process	2	P11388,P61160
4	GO:0031589	cell-substrate adhesion	Biological Process	3	P12814,O43707,O15144
4	GO:0098609	cell-cell adhesion	Biological Process	4	Q68DY8,P23396,P35579,P19105
4	GO:0086019	cell-cell signaling involved in cardiac conduction	Biological Process	1	O14958
4	GO:0099536	synaptic signaling	Biological Process	4	Q16643,Q96SB3,P38919,P16615
4	GO:0198738	cell-cell signaling by wnt	Biological Process	2	Q00610,P50402
4	GO:1905114	cell surface receptor signaling pathway involved in cell-cell signaling	Biological Process	3	Q00610,P50402,P38919
4	GO:0046883	regulation of hormone secretion	Biological Process	2	P05141,P12236
4	GO:0099177	regulation of trans-synaptic signaling	Biological Process	4	Q16643,Q96SB3,P38919,P16615
4	GO:1903779	regulation of cardiac conduction	Biological Process	2	P16615,O14958
4	GO:0050805	negative regulation of synaptic transmission	Biological Process	1	P38919
4	GO:0061337	cardiac conduction	Biological Process	2	O14958,P16615
4	GO:0001649	osteoblast differentiation	Biological Process	5	Q08211,Q9NR30,P38159,Q86V81,Q00610
4	GO:0001817	regulation of cytokine production	Biological Process	10	Q9NR30,Q08211,P12956,P13010,P78527,P23396,Q9NZI8,Q9Y6M1,O00425,P04406
4	GO:0001819	positive regulation of cytokine production	Biological Process	7	Q9NR30,Q08211,P12956,P13010,P78527,P23396,P04406
4	GO:0032606	type I interferon production	Biological Process	4	Q08211,P12956,P13010,P78527
4	GO:0032621	interleukin-18 production	Biological Process	1	Q08211
4	GO:0032623	interleukin-2 production	Biological Process	1	P23396
4	GO:0032635	interleukin-6 production	Biological Process	1	Q08211
4	GO:0042089	cytokine biosynthetic process	Biological Process	3	Q9NZI8,Q9Y6M1,O00425
4	GO:0050663	cytokine secretion	Biological Process	2	Q08211,P04406
4	GO:0071706	tumor necrosis factor superfamily cytokine production	Biological Process	1	Q08211
4	GO:0003012	muscle system process	Biological Process	14	P63316,Q7Z406,P16615,P13639,P11055,P19105,P14649,P50402,Q9Y623,Q7Z554,O14958,P08590,P09874,P06733
4	GO:0003013	circulatory system process	Biological Process	4	P16615,P08590,O14958,P63316
4	GO:0003016	respiratory system process	Biological Process	1	P63316
4	GO:0050877	nervous system process	Biological Process	7	Q7Z406,P63173,P18085,Q96SB3,P38919,P61160,P35580
4	GO:0044057	regulation of system process	Biological Process	8	P16615,P08590,O14958,P63316,Q7Z554,P09874,P06733,P38919
4	GO:0009790	embryo development	Biological Process	12	P35580,P35579,Q16643,Q08J23,P78527,Q6DKI1,Q9UMS4,P62753,P11055,P11388,P63173,P38919
4	GO:0035295	tube development	Biological Process	3	P35579,P31151,P14618
4	GO:0046660	female sex differentiation	Biological Process	1	P11021
4	GO:0048731	system development	Biological Process	45	P63173,P35579,P31151,P11021,P35580,P14618,P62330,O14578,P62753,P30048,Q15050,P13639,P11388,P78527,O75369,Q9Y3A2,P61026,P12956,P18085,Q9P0M6,P13010,P50402,P11055,Q7Z406,P14649,P63104,Q96SB3,P12277,P16104,Q9NZI8,P12814,P09874,Q86YZ3,O75367,Q9UMS4,Q16643,P38919,Q08J23,Q5HYL6,Q5U071,P08590,P63316,Q00610,P61160,Q13243
4	GO:0048736	appendage development	Biological Process	1	P11055
4	GO:2000026	regulation of multicellular organismal development	Biological Process	12	P11021,O75367,Q9P0M6,Q9UMS4,Q16643,Q5U071,P13010,Q00610,P62330,P61160,P63104,P14618
4	GO:0003002	regionalization	Biological Process	1	P78527
4	GO:0035019	somatic stem cell population maintenance	Biological Process	1	P24928
4	GO:0097150	neuronal stem cell population maintenance	Biological Process	1	Q9NZI8
4	GO:2000036	regulation of stem cell population maintenance	Biological Process	2	Q15717,Q15061
4	GO:0022405	hair cycle process	Biological Process	1	Q08J23
4	GO:0034383	low-density lipoprotein particle clearance	Biological Process	2	P09496,Q00610
4	GO:0042633	hair cycle	Biological Process	1	Q08J23
4	GO:0001659	temperature homeostasis	Biological Process	1	Q96HS1
4	GO:0001894	tissue homeostasis	Biological Process	1	Q9H444
4	GO:0050891	multicellular organismal water homeostasis	Biological Process	1	Q86YZ3
4	GO:0007596	blood coagulation	Biological Process	6	P63104,A0A0F7G8J1,P35579,P19105,A0A3S8NFS6,P45973
4	GO:0050819	negative regulation of coagulation	Biological Process	1	A0A0F7G8J1
4	GO:0050818	regulation of coagulation	Biological Process	2	A0A0F7G8J1,A0A3S8NFS6
4	GO:0050881	musculoskeletal movement	Biological Process	5	P63316,Q7Z406,P16615,P13639,P11055
4	GO:0010632	regulation of epithelial cell migration	Biological Process	2	P25705,P62330
4	GO:0010634	positive regulation of epithelial cell migration	Biological Process	2	P25705,P62330
4	GO:0014742	positive regulation of muscle hypertrophy	Biological Process	1	P09874
4	GO:0045618	positive regulation of keratinocyte differentiation	Biological Process	2	O75367,Q9P0M6
4	GO:0045933	positive regulation of muscle contraction	Biological Process	1	P06733
4	GO:0051962	positive regulation of nervous system development	Biological Process	5	P11021,Q9UMS4,Q16643,P13010,P61160
4	GO:1903524	positive regulation of blood circulation	Biological Process	1	P16615
4	GO:1904018	positive regulation of vasculature development	Biological Process	1	P14618
4	GO:0031645	negative regulation of neurological system process	Biological Process	1	P38919
4	GO:0051961	negative regulation of nervous system development	Biological Process	1	P62330
4	GO:1903523	negative regulation of blood circulation	Biological Process	1	P16615
4	GO:0090132	epithelium migration	Biological Process	3	P35579,P25705,P62330
4	GO:0150093	amyloid-beta clearance by transcytosis	Biological Process	1	Q00610
4	GO:0003206	cardiac chamber morphogenesis	Biological Process	2	P08590,P63316
4	GO:0007164	establishment of tissue polarity	Biological Process	1	Q00610
4	GO:0009887	animal organ morphogenesis	Biological Process	5	P63173,P38919,P08590,P63316,Q00610
4	GO:0010171	body morphogenesis	Biological Process	1	P11055
4	GO:0021575	hindbrain morphogenesis	Biological Process	1	P11021
4	GO:0021587	cerebellum morphogenesis	Biological Process	1	P11021
4	GO:0022603	regulation of anatomical structure morphogenesis	Biological Process	9	P35580,P35579,Q7Z406,Q16643,Q00610,P61160,O43707,O15144,P14618
4	GO:0035107	appendage morphogenesis	Biological Process	1	P11055
4	GO:0035239	tube morphogenesis	Biological Process	3	P35579,P31151,P14618
4	GO:0048598	embryonic morphogenesis	Biological Process	4	P62753,P11055,P63173,P38919
4	GO:0048729	tissue morphogenesis	Biological Process	4	P61026,P08590,P63316,Q00610
4	GO:0060323	head morphogenesis	Biological Process	1	P11055
4	GO:0060325	face morphogenesis	Biological Process	1	P11055
4	GO:0001525	angiogenesis	Biological Process	3	P14618,P35579,P31151
4	GO:0001756	somitogenesis	Biological Process	1	P78527
4	GO:0001825	blastocyst formation	Biological Process	1	Q6DKI1
4	GO:0010927	cellular component assembly involved in morphogenesis	Biological Process	3	O14958,P11055,P35580
4	GO:0030220	platelet formation	Biological Process	2	P35579,P12814
4	GO:0060074	synapse maturation	Biological Process	1	P63104
4	GO:0071695	anatomical structure maturation	Biological Process	1	Q08J23
4	GO:0021577	hindbrain structural organization	Biological Process	1	P11021
4	GO:0021589	cerebellum structural organization	Biological Process	1	P11021
4	GO:0001568	blood vessel development	Biological Process	4	P35579,P31151,P35580,P14618
4	GO:0001824	blastocyst development	Biological Process	2	Q6DKI1,Q9UMS4
4	GO:0001942	hair follicle development	Biological Process	1	Q08J23
4	GO:0003205	cardiac chamber development	Biological Process	3	P35580,P08590,P63316
4	GO:0003279	cardiac septum development	Biological Process	1	P35580
4	GO:0009888	tissue development	Biological Process	20	P78527,O75369,Q7Z406,P14649,P16615,P31151,P31942,P61026,Q86YZ3,P13639,P50402,P14618,O75367,Q9P0M6,P63173,Q08J23,P35580,P08590,P63316,Q00610
4	GO:0016358	dendrite development	Biological Process	5	Q16643,P18085,P62330,P61160,Q96SB3
4	GO:0021537	telencephalon development	Biological Process	4	P35580,Q96SB3,P16104,Q9NZI8
4	GO:0021543	pallium development	Biological Process	3	Q96SB3,P16104,Q9NZI8
4	GO:0021549	cerebellum development	Biological Process	3	P11021,P35580,P12277
4	GO:0021592	fourth ventricle development	Biological Process	1	P35580
4	GO:0021670	lateral ventricle development	Biological Process	1	P35580
4	GO:0021678	third ventricle development	Biological Process	1	P35580
4	GO:0021680	cerebellar Purkinje cell layer development	Biological Process	2	P35580,P11021
4	GO:0021695	cerebellar cortex development	Biological Process	2	P35580,P11021
4	GO:0021766	hippocampus development	Biological Process	1	Q96SB3
4	GO:0021987	cerebral cortex development	Biological Process	2	P16104,Q96SB3
4	GO:0022037	metencephalon development	Biological Process	3	P12277,P11021,P35580
4	GO:0030900	forebrain development	Biological Process	4	P35580,Q96SB3,P16104,Q9NZI8
4	GO:0030901	midbrain development	Biological Process	2	P12277,P11021
4	GO:0030902	hindbrain development	Biological Process	3	P12277,P11021,P35580
4	GO:0031099	regeneration	Biological Process	2	P14618,Q13243
4	GO:0048513	animal organ development	Biological Process	38	P11021,P14618,P62330,O14578,P62753,P30048,Q15050,P13639,P11388,P78527,P35580,O75369,P12956,P18085,Q9P0M6,P13010,P50402,P11055,Q7Z406,P14649,P12277,Q96SB3,P16104,Q9NZI8,P31151,P35579,P12814,P09874,Q86YZ3,P63173,O75367,P38919,Q08J23,Q5HYL6,P08590,P63316,Q00610,Q13243
4	GO:0048857	neural nucleus development	Biological Process	2	P12277,P11021
4	GO:0060021	roof of mouth development	Biological Process	1	Q9NWT1
4	GO:0060041	retina development in camera-type eye	Biological Process	1	P35580
4	GO:0060322	head development	Biological Process	12	P12956,P18085,Q9P0M6,P13010,P78527,P12277,P11021,P35580,Q96SB3,P16104,Q9NZI8,P11055
4	GO:0060324	face development	Biological Process	1	P11055
4	GO:0060996	dendritic spine development	Biological Process	4	P62330,Q16643,P61160,P18085
4	GO:0061061	muscle structure development	Biological Process	12	P50402,P11055,Q7Z406,P14649,O75369,P35579,P16615,P13639,O14958,P35580,P08590,P63316
4	GO:1904888	cranial skeletal system development	Biological Process	1	P38919
4	GO:0045682	regulation of epidermis development	Biological Process	2	O75367,Q9P0M6
4	GO:0045684	positive regulation of epidermis development	Biological Process	2	O75367,Q9P0M6
4	GO:0050920	regulation of chemotaxis	Biological Process	1	P31151
4	GO:1902186	regulation of viral release from host cell	Biological Process	1	Q9H444
4	GO:2000145	regulation of cell motility	Biological Process	5	P31151,O43707,P11021,P25705,P62330
4	GO:0050921	positive regulation of chemotaxis	Biological Process	1	P31151
4	GO:1902188	positive regulation of viral release from host cell	Biological Process	1	Q9H444
4	GO:2000147	positive regulation of cell motility	Biological Process	5	P31151,O43707,P11021,P25705,P62330
4	GO:0006935	chemotaxis	Biological Process	2	P35580,P31151
4	GO:0016477	cell migration	Biological Process	9	P35580,P31151,O43707,P11021,P35579,P25705,P62330,P18085,Q96SB3
4	GO:0070358	actin polymerization-dependent cell motility	Biological Process	1	O15144
4	GO:0052126	movement in host environment	Biological Process	1	Q9H444
4	GO:0048524	positive regulation of viral process	Biological Process	4	P11388,Q08211,P24928,Q9H444
4	GO:0031334	positive regulation of protein complex assembly	Biological Process	10	P09874,P62330,P23396,B4DXW1,F8WDD7,B2R4D5,O15144,P61160,O15143,A0A1W2PNV4
4	GO:0090070	positive regulation of ribosome biogenesis	Biological Process	2	Q8TED0,Q15061
4	GO:0120034	positive regulation of plasma membrane bounded cell projection assembly	Biological Process	1	O15144
4	GO:0010811	positive regulation of cell-substrate adhesion	Biological Process	1	O15144
4	GO:0022409	positive regulation of cell-cell adhesion	Biological Process	1	P23396
4	GO:0031349	positive regulation of defense response	Biological Process	4	P12956,P13010,P78527,Q08211
4	GO:0032103	positive regulation of response to external stimulus	Biological Process	2	P31151,Q08211
4	GO:0060760	positive regulation of response to cytokine stimulus	Biological Process	1	Q08211
4	GO:1902884	positive regulation of response to oxidative stress	Biological Process	1	O75367
4	GO:2000774	positive regulation of cellular senescence	Biological Process	1	P17096
4	GO:0032241	positive regulation of nucleobase-containing compound transport	Biological Process	1	Q08211
4	GO:0032388	positive regulation of intracellular transport	Biological Process	3	Q9NW64,P50402,Q08211
4	GO:0032411	positive regulation of transporter activity	Biological Process	1	O43707
4	GO:0034764	positive regulation of transmembrane transport	Biological Process	1	O43707
4	GO:0043270	positive regulation of ion transport	Biological Process	1	O43707
4	GO:0045807	positive regulation of endocytosis	Biological Process	1	O43707
4	GO:0051047	positive regulation of secretion	Biological Process	4	Q08211,P35580,P62330,P04406
4	GO:0051222	positive regulation of protein transport	Biological Process	6	Q08211,Q9NW64,P50402,P35580,P62330,P04406
4	GO:1901030	positive regulation of mitochondrial outer membrane permeabilization involved in apoptotic signaling pathway	Biological Process	1	P63104
4	GO:0051092	positive regulation of NF-kappaB transcription factor activity	Biological Process	3	Q08211,P23396,P30048
4	GO:0090316	positive regulation of intracellular protein transport	Biological Process	2	Q9NW64,P50402
4	GO:1900182	positive regulation of protein localization to nucleus	Biological Process	3	Q9NW64,P17987,P09874
4	GO:1903749	positive regulation of establishment of protein localization to mitochondrion	Biological Process	1	P63104
4	GO:1904377	positive regulation of protein localization to cell periphery	Biological Process	2	P62330,Q96SB3
4	GO:1904816	positive regulation of protein localization to chromosome, telomeric region	Biological Process	1	P17987
4	GO:1905477	positive regulation of protein localization to membrane	Biological Process	3	P63104,P62330,Q96SB3
4	GO:0051901	positive regulation of mitochondrial depolarization	Biological Process	1	P09874
4	GO:1904851	positive regulation of establishment of protein localization to telomere	Biological Process	1	P17987
4	GO:0048525	negative regulation of viral process	Biological Process	2	O75531,Q12906
4	GO:0032102	negative regulation of response to external stimulus	Biological Process	1	A0A0F7G8J1
4	GO:1902883	negative regulation of response to oxidative stress	Biological Process	2	P10599,O75367
4	GO:1903035	negative regulation of response to wounding	Biological Process	1	A0A0F7G8J1
4	GO:2000258	negative regulation of protein activation cascade	Biological Process	1	A0A3G2LMJ8
4	GO:2000773	negative regulation of cellular senescence	Biological Process	1	P78527
4	GO:2001024	negative regulation of response to drug	Biological Process	1	P10599
4	GO:2001229	negative regulation of response to gamma radiation	Biological Process	1	P78527
4	GO:0032387	negative regulation of intracellular transport	Biological Process	1	P10599
4	GO:0032410	negative regulation of transporter activity	Biological Process	1	O14958
4	GO:0034763	negative regulation of transmembrane transport	Biological Process	1	O14958
4	GO:0043271	negative regulation of ion transport	Biological Process	1	O14958
4	GO:0045806	negative regulation of endocytosis	Biological Process	1	P62330
4	GO:0051224	negative regulation of protein transport	Biological Process	1	P10599
4	GO:1901029	negative regulation of mitochondrial outer membrane permeabilization involved in apoptotic signaling pathway	Biological Process	1	P05141
4	GO:0030195	negative regulation of blood coagulation	Biological Process	1	A0A0F7G8J1
4	GO:0090317	negative regulation of intracellular protein transport	Biological Process	1	P10599
4	GO:1904376	negative regulation of protein localization to cell periphery	Biological Process	1	Q00610
4	GO:1904815	negative regulation of protein localization to chromosome, telomeric region	Biological Process	1	O75367
4	GO:1905476	negative regulation of protein localization to membrane	Biological Process	1	Q00610
4	GO:2000009	negative regulation of protein localization to cell surface	Biological Process	1	P62330
4	GO:0010810	regulation of cell-substrate adhesion	Biological Process	2	O43707,O15144
4	GO:0022407	regulation of cell-cell adhesion	Biological Process	1	P23396
4	GO:0032880	regulation of protein localization	Biological Process	15	P05141,P12236,Q08211,Q9NW64,P10599,P50402,P35580,P62330,P04406,P09874,P63104,Q00610,Q96SB3,O75367,P17987
4	GO:0051049	regulation of transport	Biological Process	15	O14958,P05141,P12236,P61026,O43707,P63316,Q08211,Q9NW64,P10599,P50402,P62330,P35580,P04406,P63104,P16615
4	GO:0060341	regulation of cellular localization	Biological Process	15	O14958,P63316,Q9NW64,P10599,P50402,Q08211,P09874,P63104,Q16643,Q00610,P62330,Q96SB3,P16615,O75367,P17987
4	GO:1904872	regulation of telomerase RNA localization to Cajal body	Biological Process	1	P17987
4	GO:0043903	regulation of symbiosis, encompassing mutualism through parasitism	Biological Process	7	O75531,Q12906,P11388,Q08211,P24928,Q9H444,P04406
4	GO:0050688	regulation of defense response to virus	Biological Process	1	Q08211
4	GO:0043254	regulation of protein complex assembly	Biological Process	15	B1AK87,A8K0T9,C9JUG7,P09874,Q16643,P62330,P23396,B4DXW1,F8WDD7,B2R4D5,O15144,P61160,O15143,A0A1W2PNV4,Q5HYL6
4	GO:0051963	regulation of synapse assembly	Biological Process	1	P62330
4	GO:0060491	regulation of cell projection assembly	Biological Process	2	O15144,P62330
4	GO:0090069	regulation of ribosome biogenesis	Biological Process	2	Q8TED0,Q15061
4	GO:1902115	regulation of organelle assembly	Biological Process	1	Q9H444
4	GO:1904429	regulation of t-circle formation	Biological Process	1	P13010
4	GO:0002831	regulation of response to biotic stimulus	Biological Process	1	Q08211
4	GO:0032101	regulation of response to external stimulus	Biological Process	5	A0A3G2LMJ8,P31151,A0A0F7G8J1,Q08211,A0A3S8NFS6
4	GO:0043502	regulation of muscle adaptation	Biological Process	3	P09874,P16615,P63316
4	GO:0060759	regulation of response to cytokine stimulus	Biological Process	1	Q08211
4	GO:0080134	regulation of response to stress	Biological Process	19	A0A3G2LMJ8,P12956,P13010,P78527,A0A0F7G8J1,P23396,Q08211,P16104,Q15185,Q92621,O75367,P10599,P06733,P09874,P11021,P61160,P35579,A0A3S8NFS6,P17096
4	GO:2000257	regulation of protein activation cascade	Biological Process	2	A0A3G2LMJ8,A0A3S8NFS6
4	GO:2001023	regulation of response to drug	Biological Process	1	P10599
4	GO:2001228	regulation of response to gamma radiation	Biological Process	1	P78527
4	GO:0098901	regulation of cardiac muscle cell action potential	Biological Process	1	P16615
4	GO:0030193	regulation of blood coagulation	Biological Process	2	A0A0F7G8J1,A0A3S8NFS6
4	GO:0001666	response to hypoxia	Biological Process	3	P06733,O43707,P14618
4	GO:0002931	response to ischemia	Biological Process	1	P13639
4	GO:0003299	muscle hypertrophy in response to stress	Biological Process	1	P16615
4	GO:0006952	defense response	Biological Process	14	A0A3G2LMJ8,P12956,P13010,P78527,Q5U071,P04406,Q08211,Q13151,P68371,P31151,Q9NR30,Q12906,P61160,O75369
4	GO:0006970	response to osmotic stress	Biological Process	2	P12956,P13010
4	GO:0006979	response to oxidative stress	Biological Process	9	P31151,P09874,P16615,P30048,P13639,P23396,P24941,O75367,P10599
4	GO:0009408	response to heat	Biological Process	6	P16615,P11021,Q15185,Q92621,B3KM81,O60884
4	GO:0009409	response to cold	Biological Process	1	B7Z597
4	GO:0009611	response to wounding	Biological Process	9	P35580,P35579,P45973,A0A0F7G8J1,P63104,P14618,P18085,P19105,A0A3S8NFS6
4	GO:0035902	response to immobilization stress	Biological Process	2	P61160,Q96SB3
4	GO:0035966	response to topologically incorrect protein	Biological Process	2	P11021,Q9Y5M8
4	GO:0042594	response to starvation	Biological Process	1	P11021
4	GO:0097501	stress response to metal ion	Biological Process	1	P11021
4	GO:0009991	response to extracellular stimulus	Biological Process	4	Q96SB3,P14618,P11021,P13639
4	GO:0043207	response to external biotic stimulus	Biological Process	15	P31151,P04406,O75531,P06733,P17096,M0R3F1,P26641,Q5U071,P16615,P30048,Q13151,Q08211,Q9NR30,Q12906,Q6P2Q9
4	GO:0071496	cellular response to external stimulus	Biological Process	2	Q96SB3,P11021
4	GO:0009266	response to temperature stimulus	Biological Process	7	B3KM81,O60884,B7Z597,P16615,P11021,Q15185,Q92621
4	GO:0009314	response to radiation	Biological Process	7	P16104,P09874,P78527,P12956,P13010,P11021,P10599
4	GO:0009629	response to gravity	Biological Process	1	P14618
4	GO:0070482	response to oxygen levels	Biological Process	3	O43707,P14618,P06733
4	GO:0071214	cellular response to abiotic stimulus	Biological Process	5	P09874,P12956,P13010,P16104,P11021
4	GO:0009725	response to hormone	Biological Process	9	O14654,P13639,O15143,P09874,P61026,P14618,Q13243,P78527,Q96SB3
4	GO:0070849	response to epidermal growth factor	Biological Process	2	P68104,Q96SB3
4	GO:0071495	cellular response to endogenous stimulus	Biological Process	15	P09874,O14654,P24928,P11021,P61026,P14618,Q13243,P78527,P61160,O14958,Q96SB3,P68104,P62330,P38919,P13639
4	GO:0071559	response to transforming growth factor beta	Biological Process	2	P09874,P11021
4	GO:0071774	response to fibroblast growth factor	Biological Process	1	P24928
4	GO:1990089	response to nerve growth factor	Biological Process	4	P62330,P11021,P38919,P13639
4	GO:0014870	response to muscle inactivity	Biological Process	1	P14618
4	GO:0001101	response to acid chemical	Biological Process	3	Q96SB3,P13639,P13010
4	GO:0007584	response to nutrient	Biological Process	2	P13639,P14618
4	GO:0042493	response to drug	Biological Process	13	Q96SB3,Q9NW64,P11021,P13639,P30048,P49411,P61160,P23396,O14958,P24941,P10599,Q5U071,P13010
4	GO:0009636	response to toxic substance	Biological Process	7	Q96SB3,P13639,P30048,P49411,P61160,P23396,P10599
4	GO:0009410	response to xenobiotic stimulus	Biological Process	4	Q96SB3,Q15185,P11021,O14958
4	GO:0009593	detection of chemical stimulus	Biological Process	1	O14958
4	GO:0010033	response to organic substance	Biological Process	37	Q96SB3,P11021,Q9Y5M8,P09874,O14654,P24928,P38919,P63104,P13639,O15143,P16615,Q5U071,P31151,P30048,Q13151,P61026,P14618,Q13243,P78527,O43707,P22626,P17987,P61160,Q9NR30,P49411,Q08211,Q6P2Q9,O14958,P04406,O75369,P38159,P23396,P50402,P68104,P13010,P62330,P05141
4	GO:0010035	response to inorganic substance	Biological Process	10	O14958,P63316,P13639,P30048,P23396,P11021,P09874,P24941,P38919,P10599
4	GO:0046677	response to antibiotic	Biological Process	7	P61160,P13639,P30048,P49411,P23396,P11021,P10599
4	GO:0061481	response to TNF agonist	Biological Process	1	P23396
4	GO:1901698	response to nitrogen compound	Biological Process	14	Q96SB3,O14654,P11021,P09874,P61026,P14618,Q13243,P78527,P61160,Q9NR30,P13639,O14958,Q08211,P24941
4	GO:1901700	response to oxygen-containing compound	Biological Process	22	P31151,O14654,P13639,O15143,P16615,Q5U071,P30048,Q13151,P09874,P61026,P14618,Q13243,P78527,Q96SB3,P61160,P11021,P49411,P23396,Q6P2Q9,P13010,P24941,P10599
4	GO:1902074	response to salt	Biological Process	1	P11021
4	GO:0014888	striated muscle adaptation	Biological Process	2	P16615,P63316
4	GO:0042769	DNA damage response, detection of DNA damage	Biological Process	3	P09874,P23396,P35251
4	GO:0007597	blood coagulation, intrinsic pathway	Biological Process	1	A0A3S8NFS6
4	GO:0072378	blood coagulation, fibrin clot formation	Biological Process	1	A0A3S8NFS6
4	GO:0033750	ribosome localization	Biological Process	2	Q15050,Q96GA3
4	GO:0071426	ribonucleoprotein complex export from nucleus	Biological Process	9	Q15050,Q96GA3,P22626,Q86V81,P38919,P61326,Q13243,Q9Y5S9,Q92621
4	GO:0097120	receptor localization to synapse	Biological Process	1	Q16643
4	GO:0008104	protein localization	Biological Process	63	Q15050,Q96GA3,A8K7D9,P22626,Q86V81,P38919,P61326,Q13243,Q9Y5S9,Q92621,P63104,P05387,P32969,P08708,P23396,P62750,P63173,P30050,P60866,P42677,P62269,P62280,P18124,P36578,Q02878,Q9Y3U8,P62424,P42766,P62851,P83881,P26373,P62753,P49207,P25398,Q9H444,P12236,P61026,P18085,P62330,P09496,Q00610,O75369,P05141,P35579,O43707,F5H018,Q5HYM2,Q8TAA5,P11021,Q16643,Q9UMS4,Q08211,Q9NW64,P17987,P10599,P50402,P35580,…
4	GO:0006403	RNA localization	Biological Process	16	Q15050,Q96GA3,Q86V81,P38919,P61326,Q13243,Q9Y5S9,P22626,Q92621,Q08211,Q9Y2X3,Q9NZI8,Q9Y6M1,O00425,P17987,O94906
4	GO:0070727	cellular macromolecule localization	Biological Process	56	Q15050,Q96GA3,A8K7D9,P22626,Q86V81,P38919,P61326,Q13243,Q9Y5S9,Q92621,P63104,P05387,P32969,P08708,P23396,P62750,P63173,P30050,P60866,P42677,P62269,P62280,P18124,P36578,Q02878,Q9Y3U8,P62424,P42766,P62851,P83881,P26373,P62753,P49207,P25398,Q9H444,P12236,P61026,P18085,P62330,P09496,Q00610,O75369,Q8TAA5,P11021,Q16643,Q9UMS4,Q9NW64,P10599,P50402,P13010,O75367,Q9P0M6,P09874,Q96SB3,Q08211,P17987
4	GO:0006810	transport	Biological Process	92	Q15050,Q96GA3,A8K7D9,O43707,P12814,P61026,P18085,B4DXN3,P62330,O14958,Q86V81,P38919,P61326,Q13243,Q9Y5S9,P22626,Q92621,P63104,P05387,P32969,P08708,P23396,P62750,P63173,P30050,P60866,P42677,P62269,P62280,P18124,P36578,Q02878,Q9Y3U8,P62424,P42766,P62851,P83881,P26373,P62753,P49207,P25398,Q9H444,P12236,P24941,E9PMI6,P09496,Q00610,P35580,P35579,F5H018,B2RA72,P05141,Q5HYM2,P02774,E9PCX7,Q0QEN7,P25705,…
4	GO:0045184	establishment of protein localization	Biological Process	57	Q15050,Q96GA3,A8K7D9,P22626,Q86V81,P38919,P61326,Q13243,Q9Y5S9,Q92621,P63104,P05387,P32969,P08708,P23396,P62750,P63173,P30050,P60866,P42677,P62269,P62280,P18124,P36578,Q02878,Q9Y3U8,P62424,P42766,P62851,P83881,P26373,P62753,P49207,P25398,Q9H444,P12236,P61026,P18085,P62330,P09496,Q00610,P05141,P35579,O43707,F5H018,Q5HYM2,Q8TAA5,P11021,Q08211,Q9NW64,P17987,P10599,P50402,P35580,P04406,O75367,Q9P0M6
4	GO:0051236	establishment of RNA localization	Biological Process	13	Q15050,Q96GA3,Q86V81,P38919,P61326,Q13243,Q9Y5S9,P22626,Q92621,Q08211,Q9NZI8,Q9Y6M1,O00425
4	GO:0051649	establishment of localization in cell	Biological Process	65	Q15050,Q96GA3,A8K7D9,Q86V81,P38919,P61326,Q13243,Q9Y5S9,P22626,Q92621,P63104,P05387,P32969,P08708,P23396,P62750,P63173,P30050,P60866,P42677,P62269,P62280,P18124,P36578,Q02878,Q9Y3U8,P62424,P42766,P62851,P83881,P26373,P62753,P49207,P25398,Q9H444,P12236,P61026,P18085,P62330,P09496,Q00610,F5H018,P35580,O14958,P61160,O43707,Q8TAA5,P11021,P63316,Q5HYM2,Q9NW64,P25705,P10599,P50402,Q08211,C9JXG8,Q562R1,…
4	GO:0051656	establishment of organelle localization	Biological Process	10	Q15050,Q96GA3,Q9H444,P35580,P61160,O43707,P35579,P63104,A0A2U3TZL8,P16615
4	GO:0051208	sequestering of calcium ion	Biological Process	1	O14958
4	GO:0045185	maintenance of protein location	Biological Process	4	O75369,Q16643,P11021,P10599
4	GO:0051238	sequestering of metal ion	Biological Process	1	P31151
4	GO:0046907	intracellular transport	Biological Process	62	Q15050,Q96GA3,A8K7D9,Q86V81,P38919,P61326,Q13243,Q9Y5S9,P22626,Q92621,P63104,P05387,P32969,P08708,P23396,P62750,P63173,P30050,P60866,P42677,P62269,P62280,P18124,P36578,Q02878,Q9Y3U8,P62424,P42766,P62851,P83881,P26373,P62753,P49207,P25398,Q9H444,P12236,P61026,P18085,P62330,P09496,Q00610,F5H018,P35580,P61160,O43707,Q8TAA5,P11021,P63316,Q5HYM2,Q9NW64,P25705,P10599,P50402,Q08211,O75531,P17096,P62318,…
4	GO:0051640	organelle localization	Biological Process	13	Q15050,Q96GA3,P61026,Q9H444,P35580,P61160,O43707,P35579,P63104,A0A2U3TZL8,P68371,P23258,P16615
4	GO:0051668	localization within membrane	Biological Process	1	Q16643
4	GO:0071166	ribonucleoprotein complex localization	Biological Process	9	Q15050,Q96GA3,P22626,Q86V81,P38919,P61326,Q13243,Q9Y5S9,Q92621
4	GO:0044766	multi-organism transport	Biological Process	3	P17987,Q86V81,Q92621
4	GO:0019730	antimicrobial humoral response	Biological Process	2	P04406,P31151
4	GO:0009615	response to virus	Biological Process	8	Q08211,Q9NR30,Q12906,O75531,P06733,P17096,M0R3F1,P26641
4	GO:0009617	response to bacterium	Biological Process	6	Q5U071,P31151,P16615,P30048,Q13151,Q6P2Q9
4	GO:0009620	response to fungus	Biological Process	1	P04406
4	GO:0098542	defense response to other organism	Biological Process	6	P04406,Q5U071,P31151,Q08211,Q9NR30,Q12906
4	GO:0044403	symbiont process	Biological Process	41	P05141,P16104,P12236,Q86V81,P45973,Q92621,Q9H444,P05387,P32969,P08708,P23396,P62750,P63173,P30050,P60866,P42677,P62269,P62280,P18124,P36578,Q02878,Q9Y3U8,P62424,P42766,P62851,P83881,P26373,P62753,P49207,P25398,Q15365,Q08211,P17987,O75531,Q12906,P11388,P24928,P04406,P12956,P17096,P13010
4	GO:0035821	modification of morphology or physiology of other organism	Biological Process	1	P04406
4	GO:0051701	interaction with host	Biological Process	4	P17987,Q86V81,P04406,Q9H444
4	GO:0051702	interaction with symbiont	Biological Process	1	P04406
4	GO:0001505	regulation of neurotransmitter levels	Biological Process	2	H0YIZ0,P16615
4	GO:0002026	regulation of the force of heart contraction	Biological Process	2	P16615,P08590
4	GO:0002027	regulation of heart rate	Biological Process	2	P16615,O14958
4	GO:0008360	regulation of cell shape	Biological Process	3	P35580,P35579,Q7Z406
4	GO:0010817	regulation of hormone levels	Biological Process	2	P05141,P12236
4	GO:0031647	regulation of protein stability	Biological Process	4	P04406,Q15185,P17987,P78527
4	GO:0032204	regulation of telomere maintenance	Biological Process	5	Q9H0A0,P17987,P13010,P09874,P22626
4	GO:0032972	regulation of muscle filament sliding speed	Biological Process	1	P63316
4	GO:0042391	regulation of membrane potential	Biological Process	6	Q7Z406,P30048,P09874,O14958,P16615,P38919
4	GO:0042592	homeostatic process	Biological Process	24	P09874,P12956,Q15185,P13010,P78527,E7ESD9,O14958,V9HW35,P10599,P30048,P16615,E9PMI6,P62753,Q9NY12,P35251,P12277,Q9H0A0,P17987,P08708,Q9H444,Q5HYL6,Q86YZ3,Q96HS1,P22626
4	GO:0043487	regulation of RNA stability	Biological Process	7	Q9NZI8,Q15717,P63104,Q9Y6M1,O00425,Q08211,Q13151
4	GO:0048167	regulation of synaptic plasticity	Biological Process	1	Q16643
4	GO:0050803	regulation of synapse structure or activity	Biological Process	5	Q16643,P61160,P63104,P18085,P62330
4	GO:0050878	regulation of body fluid levels	Biological Process	7	P45973,A0A0F7G8J1,P63104,Q86YZ3,P35579,P19105,A0A3S8NFS6
4	GO:0090066	regulation of anatomical structure size	Biological Process	16	B1AK87,A8K0T9,C9JUG7,E9PMI6,O14578,Q16643,F6RFD5,P62330,B4DXW1,F8WDD7,B2R4D5,O15144,P61160,O15143,A0A1W2PNV4,Q5HYL6
4	GO:0090559	regulation of membrane permeability	Biological Process	2	P63104,P05141
4	GO:0032409	regulation of transporter activity	Biological Process	2	O43707,O14958
4	GO:0044092	negative regulation of molecular function	Biological Process	6	P04406,P30048,O14958,O75367,P11021,P38919
4	GO:0044093	positive regulation of molecular function	Biological Process	17	P18085,P23396,P10599,O43707,P08590,A0A024RBS1,P13010,P12956,Q08211,P30048,Q04837,Q15185,P17987,P62330,H0YJH9,P22626,P09874
4	GO:0050790	regulation of catalytic activity	Biological Process	19	P04406,P18085,P23396,P10599,P08590,P30048,A0A024RBS1,P13010,P63316,P12956,Q04837,Q15185,P17987,O75367,P68104,H0YJH9,P22626,Q08211,P09874
4	GO:0051090	regulation of DNA-binding transcription factor activity	Biological Process	3	Q08211,P23396,P30048
4	GO:0051098	regulation of binding	Biological Process	6	P10599,P62330,P11021,P38919,Q08211,P09874
4	GO:0022613	ribonucleoprotein complex biogenesis	Biological Process	61	A8K4Z4,B4DHZ2,B2R5U7,P62750,P30050,Q02878,A8K800,Q15050,P46087,P42677,A0A0B4J2E5,Q96GA3,Q9H0A0,Q9UMS4,Q6P2Q9,O94906,P62314,O75533,P62318,P62306,E9PMI6,I3L2C7,Q8IY81,Q9NY12,Q9Y4W2,Q9NV06,Q14692,P18124,P42766,Q6DKI1,B4DEN9,Q9GZL7,B5MCF9,P55769,P62424,P08708,Q9NV31,Q9Y2X3,Q9NR30,P38919,M0R0P1,P62753,J3KNP2,Q9UNX4,Q8TED0,Q15061,Q9Y3A2,O43818,U3KQ48,A0A0A0MTB8,Q9H9Y2,Q9H8H0,Q14690,P38159,Q13243,Q08211…
5	GO:0007292	female gamete generation	Biological Process	2	P11388,P62753
5	GO:0048232	male gamete generation	Biological Process	2	P16104,Q08J23
5	GO:0022904	respiratory electron transport chain	Biological Process	2	P13804,P38117
5	GO:0061621	canonical glycolysis	Biological Process	3	P04406,P06733,P14618
5	GO:0045333	cellular respiration	Biological Process	6	P11177,Q13584,Q0QF37,Q0QF12,P13804,P38117
5	GO:0018171	peptidyl-cysteine oxidation	Biological Process	1	P30048
5	GO:0019395	fatty acid oxidation	Biological Process	3	B4DRH6,P13804,P38117
5	GO:0043603	cellular amide metabolic process	Biological Process	106	P32969,P63173,J3QQQ9,Q02878,Q9Y3U8,P83881,P11177,A0A248RGE3,P68104,P05387,K7EJT5,S4R456,Q5JR95,C9JYQ9,Q9BTQ7,Q8NI62,Q76N57,P08708,P23396,P62750,Q96IR1,F8W7C6,I3L3P7,D6RG13,A0A2R8Y811,A0A2R8Y849,G3V203,P30050,A0A087WXM6,A0PJ62,B3KS36,P60866,E9PQD7,P42677,P62269,J3KMX5,H0YLP6,P62280,P18124,P36578,M0R3D6,M0R210,Q0VGL3,Q1JQ76,A0A2R8Y623,O15235,P62424,D3YTB1,E7EX53,D6RD47,F8WBS5,M0R0F0,C9J9K3,P42766,P…
5	GO:0044270	cellular nitrogen compound catabolic process	Biological Process	38	P05387,P32969,P08708,P23396,P62750,P63173,P30050,P60866,P42677,P62269,P62280,P18124,P36578,Q02878,Q9Y3U8,P38919,P61326,P62424,P42766,P62851,P83881,P26373,P62753,P49207,P25398,Q9Y5S9,P04406,P14618,B4DHM5,Q92621,Q9NZI8,Q15717,P63104,Q9Y6M1,O00425,P06733,Q08211,Q13151
5	GO:0044271	cellular nitrogen compound biosynthetic process	Biological Process	165	P22626,P09874,O75367,P06733,P16403,Q9P0M6,P10599,P45973,P24941,P35251,P32969,P63173,J3QQQ9,Q02878,Q9Y3U8,P83881,Q9NR30,P38159,Q9Y5B9,Q08945,P24928,Q08211,P62318,P62306,P11177,P04406,P14618,B4DHM5,Q92621,H0Y4R1,A0A384N647,Q53SY7,C9JLU1,Q6E433,P17096,Q92522,A0A075B7D9,Q8TDG2,I3L1L3,Q5T6W2,O00422,P46087,A0A248RGE3,P68104,P05387,K7EJT5,S4R456,Q5JR95,C9JYQ9,Q9BTQ7,Q8NI62,Q76N57,P08708,P23396,P62750,Q9…
5	GO:0072521	purine-containing compound metabolic process	Biological Process	16	P11177,P04406,P14618,B4DHM5,Q92621,H0Y4R1,A0A384N647,P25705,Q15374,Q0QEN7,H7C086,B4DL14,P11055,Q9Y623,P06733,P09874
5	GO:0072524	pyridine-containing compound metabolic process	Biological Process	6	P04406,P14618,B4DHM5,Q92621,P06733,P11177
5	GO:0072527	pyrimidine-containing compound metabolic process	Biological Process	2	Q53SY7,B4E1E0
5	GO:0019219	regulation of nucleobase-containing compound metabolic process	Biological Process	65	Q86V81,P22626,P09874,O75367,P06733,P16403,Q9P0M6,P10599,P45973,P24941,P35251,P38159,P61326,O00422,J3QL05,Q13243,Q9Y5S9,Q92621,B4DUA2,Q02878,Q6E433,P17096,Q92522,A0A075B7D9,Q8TDG2,I3L1L3,P24928,Q08211,Q5T6W2,P46087,Q9Y5B9,Q9NZI8,S4R2Y4,P12956,Q12906,P13010,P23396,Q9H0A0,P17987,Q9NW64,Q15061,Q5JRI1,H7C1M2,Q15717,P63104,Q9Y6M1,O00425,P16104,Q8TED0,P18085,Q15365,P61160,P11388,P78527,O94906,Q9UMS4,Q13…
5	GO:0034248	regulation of cellular amide metabolic process	Biological Process	22	P63173,P61326,Q9Y5S9,P98179,A0A0F7L0Q8,Q59GC1,Q9BSH4,A0A024RBS1,P38919,Q15717,P13639,Q9H0A0,P04406,P23396,Q9NZI8,Q12906,Q9Y6M1,O00425,I3L397,Q7L0Y3,P68104,Q08211
5	GO:0051246	regulation of protein metabolic process	Biological Process	36	Q96SB3,P78527,A0A3G2LMJ8,P63173,P61326,Q9Y5S9,P98179,A0A0F7L0Q8,Q59GC1,Q9BSH4,A0A024RBS1,P06733,Q15397,P04406,P38919,Q15717,P13639,Q9H0A0,P23396,Q9NZI8,Q12906,Q9Y6M1,O00425,P11021,P10599,O75367,Q9NSM5,P12956,P13010,I3L397,Q7L0Y3,P31151,P35579,P68104,A0A3S8NFS6,Q08211
5	GO:1900125	regulation of hyaluronan biosynthetic process	Biological Process	1	Q00610
5	GO:0034249	negative regulation of cellular amide metabolic process	Biological Process	7	P04406,P23396,Q9NZI8,Q12906,P38919,Q9Y6M1,O00425
5	GO:0045934	negative regulation of nucleobase-containing compound metabolic process	Biological Process	26	P22626,P09874,O75367,P06733,P16403,Q9P0M6,P10599,P45973,P24941,P35251,S4R2Y4,P12956,Q12906,P17096,P13010,Q8TDG2,Q92522,Q9H0A0,P23396,P38159,O00422,Q15717,Q08211,Q9NZI8,Q13151,P49916
5	GO:0051248	negative regulation of protein metabolic process	Biological Process	10	P78527,A0A3G2LMJ8,P04406,P23396,Q9NZI8,Q12906,P38919,Q9Y6M1,O00425,O75367
5	GO:1900126	negative regulation of hyaluronan biosynthetic process	Biological Process	1	Q00610
5	GO:0045935	positive regulation of nucleobase-containing compound metabolic process	Biological Process	35	Q86V81,Q9Y5B9,P16403,P17096,Q92522,P23396,P17987,P13010,P24941,Q13243,Q9NW64,P24928,Q08211,P16104,P12956,Q12906,P35251,Q8TED0,Q15061,P09874,P38159,P18085,Q15365,P61160,P11388,P78527,O94906,Q9UMS4,Q13595,P98179,Q15185,Q9H8H0,P22626,P11021,P06733
5	GO:0034250	positive regulation of cellular amide metabolic process	Biological Process	8	P38919,Q15717,P13639,P98179,Q9H0A0,I3L397,Q7L0Y3,Q08211
5	GO:0051247	positive regulation of protein metabolic process	Biological Process	16	P06733,P38919,Q15717,P13639,P98179,Q9H0A0,P11021,P10599,P23396,P12956,P13010,I3L397,Q7L0Y3,P31151,P35579,Q08211
5	GO:0006022	aminoglycan metabolic process	Biological Process	1	Q00610
5	GO:0006518	peptide metabolic process	Biological Process	103	P32969,P63173,J3QQQ9,Q02878,Q9Y3U8,P83881,A0A248RGE3,P68104,P05387,K7EJT5,S4R456,Q5JR95,C9JYQ9,Q9BTQ7,Q8NI62,Q76N57,P08708,P23396,P62750,Q96IR1,F8W7C6,I3L3P7,D6RG13,A0A2R8Y811,A0A2R8Y849,G3V203,P30050,A0A087WXM6,A0PJ62,B3KS36,P60866,E9PQD7,P42677,P62269,J3KMX5,H0YLP6,P62280,P18124,P36578,M0R3D6,M0R210,Q0VGL3,Q1JQ76,A0A2R8Y623,O15235,P62424,D3YTB1,E7EX53,D6RD47,F8WBS5,M0R0F0,C9J9K3,P42766,P62851,B…
5	GO:0009112	nucleobase metabolic process	Biological Process	2	Q53SY7,Q15374
5	GO:0009116	nucleoside metabolic process	Biological Process	2	B4E1E0,A0A384N647
5	GO:0042558	pteridine-containing compound metabolic process	Biological Process	1	H0YIZ0
5	GO:1901565	organonitrogen compound catabolic process	Biological Process	10	H0YLS6,E5RJR5,Q9UMS4,P11021,P24941,P09496,Q00610,Q9NSM5,Q9H444,P68104
5	GO:1901566	organonitrogen compound biosynthetic process	Biological Process	127	P32969,P63173,J3QQQ9,Q02878,Q9Y3U8,P83881,P11177,P04406,P14618,B4DHM5,Q92621,H0Y4R1,A0A384N647,Q53SY7,A0A248RGE3,P68104,P05387,K7EJT5,S4R456,Q5JR95,C9JYQ9,Q9BTQ7,Q8NI62,Q76N57,P08708,P23396,P62750,Q96IR1,F8W7C6,I3L3P7,D6RG13,A0A2R8Y811,A0A2R8Y849,G3V203,P30050,A0A087WXM6,A0PJ62,B3KS36,P60866,E9PQD7,P42677,P62269,J3KMX5,H0YLP6,P62280,P18124,P36578,M0R3D6,M0R210,Q0VGL3,Q1JQ76,A0A2R8Y623,O15235,P624…
5	GO:0031329	regulation of cellular catabolic process	Biological Process	11	Q92621,Q9NZI8,P04406,Q15717,P63104,Q9Y6M1,O00425,Q08211,Q13151,Q9H444,P68104
5	GO:0042176	regulation of protein catabolic process	Biological Process	2	P68104,Q9NSM5
5	GO:0043470	regulation of carbohydrate catabolic process	Biological Process	1	Q92621
5	GO:0031330	negative regulation of cellular catabolic process	Biological Process	5	Q15717,Q08211,Q9NZI8,Q13151,Q9H444
5	GO:0016054	organic acid catabolic process	Biological Process	3	B4DRH6,P13804,P38117
5	GO:0017001	antibiotic catabolic process	Biological Process	1	P30048
5	GO:0019439	aromatic compound catabolic process	Biological Process	38	P05387,P32969,P08708,P23396,P62750,P63173,P30050,P60866,P42677,P62269,P62280,P18124,P36578,Q02878,Q9Y3U8,P38919,P61326,P62424,P42766,P62851,P83881,P26373,P62753,P49207,P25398,Q9Y5S9,P04406,P14618,B4DHM5,Q92621,Q9NZI8,Q15717,P63104,Q9Y6M1,O00425,P06733,Q08211,Q13151
5	GO:0032801	receptor catabolic process	Biological Process	2	P09496,Q00610
5	GO:0042737	drug catabolic process	Biological Process	1	P30048
5	GO:0044242	cellular lipid catabolic process	Biological Process	3	B4DRH6,P13804,P38117
5	GO:0044265	cellular macromolecule catabolic process	Biological Process	41	P05387,P32969,P08708,P23396,P62750,P63173,P30050,P60866,P42677,P62269,P62280,P18124,P36578,Q02878,Q9Y3U8,P38919,P61326,P62424,P42766,P62851,P83881,P26373,P62753,P49207,P25398,Q9Y5S9,H0YLS6,E5RJR5,Q9UMS4,Q9NZI8,P11021,P24941,P09496,Q00610,Q15717,P63104,Q9Y6M1,O00425,Q08211,Q13151,Q9H444
5	GO:0046700	heterocycle catabolic process	Biological Process	38	P05387,P32969,P08708,P23396,P62750,P63173,P30050,P60866,P42677,P62269,P62280,P18124,P36578,Q02878,Q9Y3U8,P38919,P61326,P62424,P42766,P62851,P83881,P26373,P62753,P49207,P25398,Q9Y5S9,P04406,P14618,B4DHM5,Q92621,Q9NZI8,Q15717,P63104,Q9Y6M1,O00425,P06733,Q08211,Q13151
5	GO:0051187	cofactor catabolic process	Biological Process	1	P30048
5	GO:0046365	monosaccharide catabolic process	Biological Process	3	P04406,P06733,P14618
5	GO:0009057	macromolecule catabolic process	Biological Process	43	P05387,P32969,P08708,P23396,P62750,P63173,P30050,P60866,P42677,P62269,P62280,P18124,P36578,Q02878,Q9Y3U8,P38919,P61326,P62424,P42766,P62851,P83881,P26373,P62753,P49207,P25398,Q9Y5S9,H0YLS6,E5RJR5,Q9UMS4,Q9NZI8,P11021,P24941,P09496,Q00610,Q9NSM5,Q15717,P63104,Q9Y6M1,O00425,Q08211,Q13151,Q9H444,P68104
5	GO:0016042	lipid catabolic process	Biological Process	3	B4DRH6,P13804,P38117
5	GO:0016052	carbohydrate catabolic process	Biological Process	5	P04406,P14618,B4DHM5,Q92621,P06733
5	GO:0046434	organophosphate catabolic process	Biological Process	5	P04406,P14618,B4DHM5,Q92621,P06733
5	GO:1901361	organic cyclic compound catabolic process	Biological Process	38	P05387,P32969,P08708,P23396,P62750,P63173,P30050,P60866,P42677,P62269,P62280,P18124,P36578,Q02878,Q9Y3U8,P38919,P61326,P62424,P42766,P62851,P83881,P26373,P62753,P49207,P25398,Q9Y5S9,P04406,P14618,B4DHM5,Q92621,Q9NZI8,Q15717,P63104,Q9Y6M1,O00425,P06733,Q08211,Q13151
5	GO:0010556	regulation of macromolecule biosynthetic process	Biological Process	65	P22626,P09874,O75367,P06733,P16403,Q9P0M6,P10599,P45973,P24941,P35251,B4DUA2,Q02878,Q6E433,P17096,Q92522,A0A075B7D9,Q8TDG2,I3L1L3,P24928,Q08211,Q5T6W2,O00422,P46087,P63173,P61326,Q9Y5S9,P98179,A0A0F7L0Q8,Q59GC1,Q9BSH4,A0A024RBS1,Q86V81,Q9Y5B9,P38919,Q15717,P13639,Q9H0A0,S4R2Y4,P12956,Q12906,P13010,P04406,P23396,Q9NZI8,Q9Y6M1,O00425,P17987,Q15061,I3L397,Q8TED0,P38159,P18085,Q15365,P61160,P11388,P7…
5	GO:0031326	regulation of cellular biosynthetic process	Biological Process	66	P22626,P09874,O75367,P06733,P16403,Q9P0M6,P10599,P45973,P24941,P35251,Q92621,B4DUA2,Q02878,Q6E433,P17096,Q92522,A0A075B7D9,Q8TDG2,I3L1L3,P24928,Q08211,Q5T6W2,O00422,P46087,P63173,P61326,Q9Y5S9,P98179,A0A0F7L0Q8,Q59GC1,Q9BSH4,A0A024RBS1,Q86V81,Q9Y5B9,P38919,Q15717,P13639,Q9H0A0,S4R2Y4,P12956,Q12906,P13010,P04406,P23396,Q9NZI8,Q9Y6M1,O00425,P17987,Q15061,I3L397,Q8TED0,P38159,P18085,Q15365,P61160,P1…
5	GO:0043255	regulation of carbohydrate biosynthetic process	Biological Process	1	Q00610
5	GO:0010558	negative regulation of macromolecule biosynthetic process	Biological Process	26	P22626,P09874,O75367,P06733,P16403,Q9P0M6,P10599,P45973,P24941,P35251,S4R2Y4,P12956,Q12906,P17096,P13010,Q8TDG2,P04406,P23396,Q9NZI8,P38919,Q9Y6M1,O00425,Q92522,Q9H0A0,P49916,Q00610
5	GO:0031327	negative regulation of cellular biosynthetic process	Biological Process	26	P22626,P09874,O75367,P06733,P16403,Q9P0M6,P10599,P45973,P24941,P35251,S4R2Y4,P12956,Q12906,P17096,P13010,Q8TDG2,P04406,P23396,Q9NZI8,P38919,Q9Y6M1,O00425,Q92522,Q9H0A0,P49916,Q00610
5	GO:0010557	positive regulation of macromolecule biosynthetic process	Biological Process	33	Q86V81,Q9Y5B9,P38919,Q15717,P13639,P98179,Q9H0A0,P16403,P17096,Q92522,P17987,P13010,P24941,Q08211,P12956,Q12906,P35251,I3L397,Q8TED0,Q15061,P09874,P38159,P18085,Q15365,P61160,P11388,P78527,O94906,Q15185,Q7L0Y3,Q9H8H0,P22626,P11021
5	GO:0031328	positive regulation of cellular biosynthetic process	Biological Process	34	Q86V81,Q9Y5B9,P38919,Q15717,P13639,P98179,Q9H0A0,P16403,P17096,Q92522,P17987,P13010,P24941,Q08211,P12956,Q12906,P35251,I3L397,Q8TED0,Q15061,P09874,P38159,P18085,Q15365,P61160,P11388,P78527,O94906,Q15185,Q7L0Y3,Q9H8H0,P22626,P11021,P06733
5	GO:0042136	neurotransmitter biosynthetic process	Biological Process	1	H0YIZ0
5	GO:0016053	organic acid biosynthetic process	Biological Process	11	Q15185,P04406,P14618,B4DHM5,Q92621,B4DY32,P54886,B3KMB7,H0YIZ0,P06733,Q00610
5	GO:0018130	heterocycle biosynthetic process	Biological Process	69	P22626,P09874,O75367,P06733,P16403,Q9P0M6,P10599,P45973,P24941,P35251,Q9NR30,P38159,Q9Y5B9,Q08945,P24928,Q08211,P62318,P62306,P11177,P04406,P14618,B4DHM5,Q92621,H0Y4R1,A0A384N647,Q53SY7,C9JLU1,Q02878,Q6E433,P17096,Q92522,A0A075B7D9,Q8TDG2,I3L1L3,Q5T6W2,O00422,P46087,P54886,B3KMB7,P25705,Q15185,Q9NY12,Q86V81,Q15374,Q9BYG3,Q0QEN7,H7C086,B4DL14,S4R2Y4,P12956,Q12906,P13010,Q9H0A0,P17987,Q15061,B4E1E0…
5	GO:0019438	aromatic compound biosynthetic process	Biological Process	66	P22626,P09874,O75367,P06733,P16403,Q9P0M6,P10599,P45973,P24941,P35251,Q9NR30,P38159,Q9Y5B9,Q08945,P24928,Q08211,P62318,P62306,P11177,P04406,P14618,B4DHM5,Q92621,H0Y4R1,A0A384N647,C9JLU1,Q02878,Q6E433,P17096,Q92522,A0A075B7D9,Q8TDG2,I3L1L3,Q5T6W2,O00422,P46087,P25705,Q15185,Q9NY12,Q86V81,Q15374,Q9BYG3,Q0QEN7,H7C086,B4DL14,S4R2Y4,P12956,Q12906,P13010,Q9H0A0,P17987,Q15061,B4E1E0,Q8TED0,P18085,Q15365…
5	GO:0034645	cellular macromolecule biosynthetic process	Biological Process	159	Q08211,Q9Y5B9,A0A087X270,Q08945,H7C5P4,P24941,P22626,P09874,O75367,P06733,P16403,Q9P0M6,P10599,P45973,P35251,P32969,P63173,J3QQQ9,Q02878,Q9Y3U8,P83881,Q9NR30,P38159,P24928,P62318,P62306,Q04837,P17096,A4FS09,B4DDF5,B1AHA9,Q8NHX6,P49916,B4DUA2,C9JLU1,Q6E433,Q92522,A0A075B7D9,Q8TDG2,I3L1L3,Q5T6W2,O00422,P46087,A0A248RGE3,P68104,P05387,K7EJT5,S4R456,Q5JR95,C9JYQ9,Q9BTQ7,Q8NI62,Q76N57,P08708,P23396,P6…
5	GO:0042181	ketone biosynthetic process	Biological Process	1	B4DU83
5	GO:0044272	sulfur compound biosynthetic process	Biological Process	2	P11177,B4DFQ8
5	GO:0051188	cofactor biosynthetic process	Biological Process	8	P11177,P04406,P14618,B4DHM5,Q92621,B4DFQ8,B4DU83,P06733
5	GO:0034404	nucleobase-containing small molecule biosynthetic process	Biological Process	6	P04406,P14618,B4DHM5,Q92621,B4E1E0,P06733
5	GO:0046364	monosaccharide biosynthetic process	Biological Process	2	P04406,P06733
5	GO:0006556	S-adenosylmethionine biosynthetic process	Biological Process	1	B4DFQ8
5	GO:0008610	lipid biosynthetic process	Biological Process	2	Q15185,Q9UMS4
5	GO:0009059	macromolecule biosynthetic process	Biological Process	161	Q08211,Q9Y5B9,A0A087X270,Q08945,H7C5P4,P24941,P22626,P09874,O75367,P06733,P16403,Q9P0M6,P10599,P45973,P35251,P32969,P63173,J3QQQ9,Q02878,Q9Y3U8,P83881,Q9NR30,P38159,P24928,P62318,P62306,Q04837,P17096,A4FS09,B4DDF5,B1AHA9,Q8NHX6,P49916,B4DUA2,C9JLU1,Q6E433,Q92522,A0A075B7D9,Q8TDG2,I3L1L3,Q5T6W2,O00422,P46087,A0A248RGE3,P68104,P05387,K7EJT5,S4R456,Q5JR95,C9JYQ9,Q9BTQ7,Q8NI62,Q76N57,P08708,P23396,P6…
5	GO:0016051	carbohydrate biosynthetic process	Biological Process	3	P04406,P06733,Q00610
5	GO:0035384	thioester biosynthetic process	Biological Process	1	P11177
5	GO:0090407	organophosphate biosynthetic process	Biological Process	17	P11177,P04406,P14618,B4DHM5,Q92621,H0Y4R1,A0A384N647,P25705,Q0QEN7,H7C086,B4DL14,B4E1E0,B4DNF8,B3KVA7,P12277,P06733,P09874
5	GO:1901137	carbohydrate derivative biosynthetic process	Biological Process	15	P11177,P04406,P14618,B4DHM5,Q92621,A0A384N647,Q96HX3,P25705,Q0QEN7,H7C086,B4DL14,B4E1E0,P06733,Q00610,P09874
5	GO:1901362	organic cyclic compound biosynthetic process	Biological Process	69	P22626,P09874,O75367,P06733,P16403,Q9P0M6,P10599,P45973,P24941,P35251,Q9NR30,P38159,Q9Y5B9,Q08945,P24928,Q08211,P62318,P62306,P11177,P04406,P14618,B4DHM5,Q92621,H0Y4R1,A0A384N647,Q53SY7,C9JLU1,Q02878,Q6E433,P17096,Q92522,A0A075B7D9,Q8TDG2,I3L1L3,Q5T6W2,O00422,P46087,P54886,B3KMB7,P25705,Q15185,Q9NY12,Q86V81,Q15374,Q9BYG3,Q0QEN7,H7C086,B4DL14,S4R2Y4,P12956,Q12906,P13010,Q9H0A0,P17987,Q15061,B4E1E0…
5	GO:1901570	fatty acid derivative biosynthetic process	Biological Process	1	Q15185
5	GO:0010629	negative regulation of gene expression	Biological Process	57	P22626,P09874,O75367,P06733,P16403,Q9P0M6,P10599,P45973,P24941,P35251,P05387,P32969,P08708,P23396,P62750,P63173,P30050,P60866,P42677,P62269,P62280,P18124,P36578,Q02878,Q9Y3U8,P38919,P61326,P62424,P42766,P62851,P83881,P26373,P62753,P49207,P25398,Q9Y5S9,A0A3G2LMJ8,Q9NZI8,S4R2Y4,P12956,Q12906,P17096,P13010,Q8TDG2,P04406,Q9Y6M1,O00425,Q08211,Q92522,Q15717,P63104,P38159,O00422,P24928,Q92621,Q13151,Q5U…
5	GO:0051053	negative regulation of DNA metabolic process	Biological Process	7	Q9H0A0,P23396,P16403,Q92522,P49916,P09874,P13010
5	GO:0051253	negative regulation of RNA metabolic process	Biological Process	23	P22626,P09874,O75367,P06733,P16403,Q9P0M6,P10599,P45973,P24941,P35251,S4R2Y4,P12956,Q12906,P17096,P13010,Q8TDG2,Q92522,P38159,O00422,Q15717,Q08211,Q9NZI8,Q13151
5	GO:0010563	negative regulation of phosphorus metabolic process	Biological Process	4	P78527,O75367,P30048,P09874
5	GO:0032269	negative regulation of cellular protein metabolic process	Biological Process	10	P78527,A0A3G2LMJ8,P04406,P23396,Q9NZI8,Q12906,P38919,Q9Y6M1,O00425,O75367
5	GO:0045980	negative regulation of nucleotide metabolic process	Biological Process	1	P09874
5	GO:0010628	positive regulation of gene expression	Biological Process	43	Q86V81,Q9Y5B9,P06733,P38919,Q15717,P13639,P98179,Q9H0A0,P16403,P17096,Q92522,Q13243,Q9NW64,P24928,O75367,Q9NR30,O75533,P12956,Q12906,P24941,P35251,I3L397,Q8TED0,Q15061,P09874,Q08211,P38159,P18085,Q15365,P61160,P11388,P78527,O94906,Q9UMS4,Q13595,Q7L0Y3,Q9NZI8,Q13151,Q9H8H0,P35579,P11021,P23396,Q5U071
5	GO:0032075	positive regulation of nuclease activity	Biological Process	1	P23396
5	GO:0051054	positive regulation of DNA metabolic process	Biological Process	11	P23396,P17987,P13010,P24941,Q08211,P16104,Q15185,P09874,P22626,P61160,P78527
5	GO:0051254	positive regulation of RNA metabolic process	Biological Process	28	Q86V81,Q9Y5B9,P16403,P17096,Q92522,Q13243,Q9NW64,P24928,P12956,Q12906,P24941,P35251,Q8TED0,Q15061,P09874,Q08211,P38159,P18085,Q15365,P61160,P11388,P78527,O94906,Q9UMS4,Q13595,P98179,Q9H8H0,P11021
5	GO:0010562	positive regulation of phosphorus metabolic process	Biological Process	8	P10599,A0A024RBS1,Q15185,P23396,P12956,P13010,P31151,P06733
5	GO:0032270	positive regulation of cellular protein metabolic process	Biological Process	16	P06733,P38919,Q15717,P13639,P98179,Q9H0A0,P11021,P10599,P23396,P12956,P13010,I3L397,Q7L0Y3,P31151,P35579,Q08211
5	GO:0045981	positive regulation of nucleotide metabolic process	Biological Process	1	P06733
5	GO:0032268	regulation of cellular protein metabolic process	Biological Process	33	Q96SB3,P78527,A0A3G2LMJ8,P63173,P61326,Q9Y5S9,P98179,A0A0F7L0Q8,Q59GC1,Q9BSH4,A0A024RBS1,P06733,Q15397,P04406,P38919,Q15717,P13639,Q9H0A0,P23396,Q9NZI8,Q12906,Q9Y6M1,O00425,P11021,P10599,O75367,P12956,P13010,I3L397,Q7L0Y3,P31151,P35579,Q08211
5	GO:0043467	regulation of generation of precursor metabolites and energy	Biological Process	1	Q92621
5	GO:0051174	regulation of phosphorus metabolic process	Biological Process	15	Q96SB3,P78527,Q92621,P10599,O75367,P30048,A0A024RBS1,Q15185,P23396,P12956,P13010,P31151,P68104,P09874,P06733
5	GO:0051193	regulation of cofactor metabolic process	Biological Process	1	Q92621
5	GO:2000377	regulation of reactive oxygen species metabolic process	Biological Process	1	P18085
5	GO:0010468	regulation of gene expression	Biological Process	94	P22626,P09874,O75367,P06733,P16403,Q9P0M6,P10599,P45973,P24941,P35251,P05387,P32969,P08708,P23396,P62750,P63173,P30050,P60866,P42677,P62269,P62280,P18124,P36578,Q02878,Q9Y3U8,P38919,P61326,P62424,P42766,P62851,P83881,P26373,P62753,P49207,P25398,Q9Y5S9,P38159,O00422,J3QL05,Q13243,A0A3G2LMJ8,Q6E433,P17096,Q92522,A0A075B7D9,Q8TDG2,I3L1L3,P24928,Q08211,Q5T6W2,P46087,P98179,A0A0F7L0Q8,Q59GC1,Q9BSH4,A0…
5	GO:0032069	regulation of nuclease activity	Biological Process	1	P23396
5	GO:0032881	regulation of polysaccharide metabolic process	Biological Process	1	Q00610
5	GO:0051052	regulation of DNA metabolic process	Biological Process	17	Q86V81,B4DUA2,P23396,P13010,Q9H0A0,P17987,P24941,P09874,Q08211,P16104,P16403,Q92522,Q15185,P49916,P22626,P61160,P78527
5	GO:0051252	regulation of RNA metabolic process	Biological Process	58	P22626,P09874,O75367,P06733,P16403,Q9P0M6,P10599,P45973,P24941,P35251,P38159,P61326,O00422,J3QL05,Q13243,Q9Y5S9,Q02878,Q6E433,P17096,Q92522,A0A075B7D9,Q8TDG2,I3L1L3,P24928,Q08211,Q5T6W2,P46087,Q86V81,Q9Y5B9,Q9NZI8,S4R2Y4,P12956,Q12906,P13010,Q9NW64,Q15061,Q5JRI1,H7C1M2,Q15717,P63104,Q9Y6M1,O00425,Q8TED0,P18085,Q15365,P61160,P11388,P78527,O94906,Q9UMS4,Q13595,P98179,P23396,P30048,Q13151,Q9H8H0,O43…
5	GO:0006140	regulation of nucleotide metabolic process	Biological Process	3	Q92621,P09874,P06733
5	GO:0006109	regulation of carbohydrate metabolic process	Biological Process	2	Q92621,Q00610
5	GO:0019216	regulation of lipid metabolic process	Biological Process	1	O75367
5	GO:0001510	RNA methylation	Biological Process	4	Q8IY81,Q08J23,P46087,Q7L0Y3
5	GO:0006306	DNA methylation	Biological Process	1	P09874
5	GO:0006479	protein methylation	Biological Process	3	O75367,P16403,P62318
5	GO:0009113	purine nucleobase biosynthetic process	Biological Process	1	Q15374
5	GO:0043436	oxoacid metabolic process	Biological Process	33	Q15185,P11177,P04406,P14618,B4DHM5,Q13584,Q0QF37,Q0QF12,B8ZZ51,Q92621,H0YIC2,Q9H9J7,Q5JTZ9,C9J7S3,A8K5W7,Q9NVC0,U3KQ50,H0YHS6,B3KUZ8,B4DY32,P54886,B4E1E0,C9JIJ6,Q53SY7,B3KMB7,P12277,B4DRH6,H0YIZ0,F5H793,P13804,P38117,P06733,Q00610
5	GO:0006119	oxidative phosphorylation	Biological Process	1	P25705
5	GO:0006757	ATP generation from ADP	Biological Process	5	P04406,P14618,B4DHM5,Q92621,P06733
5	GO:0006599	phosphagen metabolic process	Biological Process	3	B4DNF8,B3KVA7,P12277
5	GO:0006600	creatine metabolic process	Biological Process	1	P12277
5	GO:0006760	folic acid-containing compound metabolic process	Biological Process	1	H0YIZ0
5	GO:0035999	tetrahydrofolate interconversion	Biological Process	1	H0YIZ0
5	GO:0006796	phosphate-containing compound metabolic process	Biological Process	34	Q96SB3,P78527,P11177,P04406,P14618,B4DHM5,Q92621,H0Y4R1,A0A384N647,Q12906,P24941,P25705,Q0QEN7,H7C086,B4DL14,O14578,P10599,O75367,P30048,A0A024RBS1,Q15185,P23396,B4E1E0,P12956,P13010,P11055,Q9Y623,B4DNF8,B3KVA7,P12277,P06733,P31151,P68104,P09874
5	GO:0042743	hydrogen peroxide metabolic process	Biological Process	1	P30048
5	GO:0006544	glycine metabolic process	Biological Process	1	H0YIZ0
5	GO:0046033	AMP metabolic process	Biological Process	1	A0A384N647
5	GO:0016999	antibiotic metabolic process	Biological Process	5	P11177,Q13584,Q0QF37,Q0QF12,P30048
5	GO:0046034	ATP metabolic process	Biological Process	13	P04406,P14618,B4DHM5,Q92621,P25705,Q0QEN7,H7C086,B4DL14,P06733,P09874,P11055,A0A384N647,Q9Y623
5	GO:0055129	L-proline biosynthetic process	Biological Process	1	P54886
5	GO:1901661	quinone metabolic process	Biological Process	1	B4DU83
5	GO:0006631	fatty acid metabolic process	Biological Process	4	Q15185,B4DRH6,P13804,P38117
5	GO:0030258	lipid modification	Biological Process	3	B4DRH6,P13804,P38117
5	GO:0006259	DNA metabolic process	Biological Process	41	B4DEB2,Q86V81,Q08211,Q9Y5B9,A0A087X270,Q08945,H7C5P4,P24941,P11388,P09874,P12956,Q15185,P13010,P78527,E7ESD9,P16104,P49916,P35251,Q04837,Q5U071,E9PCY5,B9EG90,P17096,A4FS09,B4DDF5,B1AHA9,Q8NHX6,B4DUA2,P23396,B5BUB1,M0R0Y3,Q9UMS4,P24928,Q9NY12,O75531,Q9H0A0,P17987,P16403,Q92522,P22626,P61160
5	GO:0009100	glycoprotein metabolic process	Biological Process	1	Q96HX3
5	GO:0043112	receptor metabolic process	Biological Process	2	Q00610,P09496
5	GO:0044267	cellular protein metabolic process	Biological Process	131	Q9UMS4,Q96SB3,P78527,A0A3G2LMJ8,P32969,P63173,J3QQQ9,Q02878,Q9Y3U8,P83881,Q9NV06,A0A248RGE3,P68104,P05387,K7EJT5,S4R456,Q5JR95,C9JYQ9,Q9BTQ7,Q8NI62,Q76N57,P08708,P23396,P62750,Q96IR1,F8W7C6,I3L3P7,D6RG13,A0A2R8Y811,A0A2R8Y849,G3V203,P30050,A0A087WXM6,A0PJ62,B3KS36,P60866,E9PQD7,P42677,P62269,J3KMX5,H0YLP6,P62280,P18124,P36578,M0R3D6,M0R210,Q0VGL3,Q1JQ76,A0A2R8Y623,O15235,P62424,D3YTB1,E7EX53,D6RD…
5	GO:0006560	proline metabolic process	Biological Process	2	P54886,B3KMB7
5	GO:0006732	coenzyme metabolic process	Biological Process	9	P11177,P04406,P14618,B4DHM5,Q92621,B4DFQ8,B4DU83,H0YIZ0,P06733
5	GO:0005976	polysaccharide metabolic process	Biological Process	1	Q00610
5	GO:0034654	nucleobase-containing compound biosynthetic process	Biological Process	65	P22626,P09874,O75367,P06733,P16403,Q9P0M6,P10599,P45973,P24941,P35251,Q9NR30,P38159,Q9Y5B9,Q08945,P24928,Q08211,P62318,P62306,P11177,P04406,P14618,B4DHM5,Q92621,H0Y4R1,A0A384N647,C9JLU1,Q02878,Q6E433,P17096,Q92522,A0A075B7D9,Q8TDG2,I3L1L3,Q5T6W2,O00422,P46087,P25705,Q15185,Q9NY12,Q86V81,Q9BYG3,Q0QEN7,H7C086,B4DL14,S4R2Y4,P12956,Q12906,P13010,Q9H0A0,P17987,Q15061,B4E1E0,Q8TED0,P18085,Q15365,P61160…
5	GO:0034655	nucleobase-containing compound catabolic process	Biological Process	38	P05387,P32969,P08708,P23396,P62750,P63173,P30050,P60866,P42677,P62269,P62280,P18124,P36578,Q02878,Q9Y3U8,P38919,P61326,P62424,P42766,P62851,P83881,P26373,P62753,P49207,P25398,Q9Y5S9,P04406,P14618,B4DHM5,Q92621,Q9NZI8,Q15717,P63104,Q9Y6M1,O00425,P06733,Q08211,Q13151
5	GO:0090304	nucleic acid metabolic process	Biological Process	162	B4DEB2,Q86V81,Q08211,Q9Y5B9,A0A087X270,Q08945,H7C5P4,P24941,P22626,P09874,O75367,P06733,P16403,Q9P0M6,P10599,P45973,P35251,Q9H0A0,P05387,P32969,P08708,P23396,P62750,P63173,P30050,P60866,P42677,P62269,P62280,P18124,P36578,Q02878,Q9Y3U8,P38919,P61326,P62424,P42766,P62851,P83881,P26373,P62753,P49207,P25398,Q9Y5S9,Q9UMS4,Q6P2Q9,O94906,P62314,O75533,P38159,O00422,J3QL05,Q13243,P62318,P62306,E9PMI6,I3L…
5	GO:0008652	cellular amino acid biosynthetic process	Biological Process	4	B4DY32,P54886,B3KMB7,H0YIZ0
5	GO:0043038	amino acid activation	Biological Process	8	H0YIC2,Q9H9J7,Q5JTZ9,C9J7S3,A8K5W7,Q9NVC0,U3KQ50,H0YHS6
5	GO:1901605	alpha-amino acid metabolic process	Biological Process	8	B4DY32,P54886,B4E1E0,C9JIJ6,Q53SY7,B3KMB7,P12277,H0YIZ0
5	GO:0008202	steroid metabolic process	Biological Process	1	P02774
5	GO:0006508	proteolysis	Biological Process	13	A0A3G2LMJ8,P35579,P38159,H0YLS6,E5RJR5,Q9UMS4,P06733,P04406,P09874,P11021,P24941,Q9H444,P23396
5	GO:0030163	protein catabolic process	Biological Process	10	H0YLS6,E5RJR5,Q9UMS4,P11021,P24941,P09496,Q00610,Q9NSM5,Q9H444,P68104
5	GO:0036211	protein modification process	Biological Process	23	Q9UMS4,Q96SB3,P78527,Q9NV06,Q12906,P24941,P09874,P18085,P62318,Q96HX3,Q15397,Q92621,O14578,P30048,P23396,P11021,P10599,O75367,P04406,P12956,P13010,P31151,P16403
5	GO:0042107	cytokine metabolic process	Biological Process	3	Q9NZI8,Q9Y6M1,O00425
5	GO:0051604	protein maturation	Biological Process	4	A0A3G2LMJ8,P06733,P09874,P35579
5	GO:0019318	hexose metabolic process	Biological Process	4	P11177,P04406,P06733,P14618
5	GO:0006775	fat-soluble vitamin metabolic process	Biological Process	1	P02774
5	GO:0006662	glycerol ether metabolic process	Biological Process	1	P10599
5	GO:0006753	nucleoside phosphate metabolic process	Biological Process	16	P11177,P04406,P14618,B4DHM5,Q92621,H0Y4R1,A0A384N647,P25705,Q0QEN7,H7C086,B4DL14,B4E1E0,P11055,Q9Y623,P06733,P09874
5	GO:0006486	protein glycosylation	Biological Process	1	Q96HX3
5	GO:0019693	ribose phosphate metabolic process	Biological Process	15	P11177,P04406,P14618,B4DHM5,Q92621,A0A384N647,P25705,Q0QEN7,H7C086,B4DL14,B4E1E0,P11055,Q9Y623,P06733,P09874
5	GO:0006637	acyl-CoA metabolic process	Biological Process	1	P11177
5	GO:0010467	gene expression	Biological Process	205	P22626,P09874,O75367,P06733,P16403,Q9P0M6,P10599,P45973,P24941,P35251,Q9H0A0,P05387,P32969,P08708,P23396,P62750,P63173,P30050,P60866,P42677,P62269,P62280,P18124,P36578,Q02878,Q9Y3U8,P38919,P61326,P62424,P42766,P62851,P83881,P26373,P62753,P49207,P25398,Q9Y5S9,Q9UMS4,Q6P2Q9,O94906,P62314,O75533,Q08211,P38159,O00422,J3QL05,Q13243,P62318,P62306,E9PMI6,I3L2C7,A0A087X0X3,P55769,Q86V81,P55795,Q15717,P31…
5	GO:0043412	macromolecule modification	Biological Process	31	Q9H0A0,Q9UMS4,Q8IY81,Q9NY12,U5U7S7,Q96SB3,P78527,Q9NV06,Q5JTZ9,Q08J23,Q12906,P24941,P09874,P18085,P62318,Q96HX3,Q15397,Q92621,O14578,P30048,P23396,P11021,P10599,O75367,P04406,P12956,P13010,P31151,P46087,Q7L0Y3,P16403
5	GO:1990966	ATP generation from poly-ADP-D-ribose	Biological Process	1	P09874
5	GO:1901657	glycosyl compound metabolic process	Biological Process	2	B4E1E0,A0A384N647
5	GO:0006690	icosanoid metabolic process	Biological Process	1	Q15185
5	GO:0042359	vitamin D metabolic process	Biological Process	1	P02774
5	GO:0052330	positive regulation by organism of programmed cell death in other organism involved in symbiotic interaction	Biological Process	1	P04406
5	GO:0001907	killing by symbiont of host cells	Biological Process	1	P04406
5	GO:0051873	killing by host of symbiont cells	Biological Process	1	P04406
5	GO:0043029	T cell homeostasis	Biological Process	1	P62753
5	GO:0002681	somatic recombination of T cell receptor gene segments	Biological Process	1	P78527
5	GO:0016447	somatic recombination of immunoglobulin gene segments	Biological Process	1	P78527
5	GO:0033151	V(D)J recombination	Biological Process	1	P78527
5	GO:0038096	Fc-gamma receptor signaling pathway involved in phagocytosis	Biological Process	3	O15144,P61160,O15143
5	GO:0002371	dendritic cell cytokine production	Biological Process	1	Q9NR30
5	GO:0002444	myeloid leukocyte mediated immunity	Biological Process	11	Q9NR30,P68104,P68371,P12956,P61026,P14618,P31151,P13639,P61160,Q86YZ3,P13010
5	GO:0002449	lymphocyte mediated immunity	Biological Process	1	P68371
5	GO:0002703	regulation of leukocyte mediated immunity	Biological Process	1	Q9NR30
5	GO:0002705	positive regulation of leukocyte mediated immunity	Biological Process	1	Q9NR30
5	GO:0030449	regulation of complement activation	Biological Process	1	A0A3G2LMJ8
5	GO:0045916	negative regulation of complement activation	Biological Process	1	A0A3G2LMJ8
5	GO:0001905	activation of membrane attack complex	Biological Process	1	A0A3G2LMJ8
5	GO:0043312	neutrophil degranulation	Biological Process	10	P68104,P68371,P12956,P61026,P14618,P31151,P13639,P61160,Q86YZ3,P13010
5	GO:0002429	immune response-activating cell surface receptor signaling pathway	Biological Process	4	P23396,O15144,P61160,O15143
5	GO:0030218	erythrocyte differentiation	Biological Process	2	P62753,Q5HYL6
5	GO:0002718	regulation of cytokine production involved in immune response	Biological Process	1	Q9NR30
5	GO:0002720	positive regulation of cytokine production involved in immune response	Biological Process	1	Q9NR30
5	GO:0061082	myeloid leukocyte cytokine production	Biological Process	1	Q9NR30
5	GO:0002637	regulation of immunoglobulin production	Biological Process	1	P78527
5	GO:0002638	negative regulation of immunoglobulin production	Biological Process	1	P78527
5	GO:0030097	hemopoiesis	Biological Process	11	Q15050,P13639,P11388,P78527,P30048,P35579,P12814,P09874,P62753,Q5HYL6,P13010
5	GO:0048536	spleen development	Biological Process	1	P78527
5	GO:0048538	thymus development	Biological Process	1	P78527
5	GO:0002688	regulation of leukocyte chemotaxis	Biological Process	1	P31151
5	GO:0071675	regulation of mononuclear cell migration	Biological Process	1	P31151
5	GO:2000401	regulation of lymphocyte migration	Biological Process	1	P31151
5	GO:0051249	regulation of lymphocyte activation	Biological Process	1	P23396
5	GO:0002920	regulation of humoral immune response	Biological Process	1	A0A3G2LMJ8
5	GO:0045088	regulation of innate immune response	Biological Process	4	P12956,P13010,P78527,Q08211
5	GO:0050854	regulation of antigen receptor-mediated signaling pathway	Biological Process	1	P23396
5	GO:0002921	negative regulation of humoral immune response	Biological Process	1	A0A3G2LMJ8
5	GO:0002690	positive regulation of leukocyte chemotaxis	Biological Process	1	P31151
5	GO:0071677	positive regulation of mononuclear cell migration	Biological Process	1	P31151
5	GO:2000403	positive regulation of lymphocyte migration	Biological Process	1	P31151
5	GO:0051251	positive regulation of lymphocyte activation	Biological Process	1	P23396
5	GO:0045089	positive regulation of innate immune response	Biological Process	4	P12956,P13010,P78527,Q08211
5	GO:0050857	positive regulation of antigen receptor-mediated signaling pathway	Biological Process	1	P23396
5	GO:0002228	natural killer cell mediated immunity	Biological Process	1	P68371
5	GO:0034341	response to interferon-gamma	Biological Process	3	P04406,P61160,O75369
5	GO:0002495	antigen processing and presentation of peptide antigen via MHC class II	Biological Process	2	P09496,Q00610
5	GO:0002478	antigen processing and presentation of exogenous peptide antigen	Biological Process	2	P09496,Q00610
5	GO:0002275	myeloid cell activation involved in immune response	Biological Process	10	P68104,P68371,P12956,P61026,P14618,P31151,P13639,P61160,Q86YZ3,P13010
5	GO:0036230	granulocyte activation	Biological Process	10	P68104,P68371,P12956,P61026,P14618,P31151,P13639,P61160,Q86YZ3,P13010
5	GO:0002285	lymphocyte activation involved in immune response	Biological Process	1	P62753
5	GO:0001767	establishment of lymphocyte polarity	Biological Process	1	P35579
5	GO:0030098	lymphocyte differentiation	Biological Process	2	P78527,P62753
5	GO:0042110	T cell activation	Biological Process	4	P35579,P62753,P78527,P23396
5	GO:0042113	B cell activation	Biological Process	1	P78527
5	GO:0046651	lymphocyte proliferation	Biological Process	2	P62753,P23396
5	GO:0002548	monocyte chemotaxis	Biological Process	1	P31151
5	GO:0048247	lymphocyte chemotaxis	Biological Process	1	P31151
5	GO:0071621	granulocyte chemotaxis	Biological Process	1	P31151
5	GO:0072678	T cell migration	Biological Process	1	P31151
5	GO:0097530	granulocyte migration	Biological Process	1	P31151
5	GO:0001560	regulation of cell growth by extracellular stimulus	Biological Process	1	Q96SB3
5	GO:0061387	regulation of extent of cell growth	Biological Process	1	Q16643
5	GO:0045773	positive regulation of axon extension	Biological Process	1	Q16643
5	GO:1990138	neuron projection extension	Biological Process	1	Q16643
5	GO:0030516	regulation of axon extension	Biological Process	1	Q16643
5	GO:0043403	skeletal muscle tissue regeneration	Biological Process	1	P14618
5	GO:0008306	associative learning	Biological Process	2	P38919,P61160
5	GO:0060179	male mating behavior	Biological Process	1	Q96SB3
5	GO:0032946	positive regulation of mononuclear cell proliferation	Biological Process	1	P23396
5	GO:0001937	negative regulation of endothelial cell proliferation	Biological Process	1	P25705
5	GO:0001936	regulation of endothelial cell proliferation	Biological Process	1	P25705
5	GO:0032944	regulation of mononuclear cell proliferation	Biological Process	1	P23396
5	GO:0055057	neuroblast division	Biological Process	1	P61026
5	GO:0022013	pallium cell proliferation in forebrain	Biological Process	1	Q9NZI8
5	GO:0033045	regulation of sister chromatid segregation	Biological Process	1	O75367
5	GO:0045876	positive regulation of sister chromatid cohesion	Biological Process	1	O75367
5	GO:0062033	positive regulation of mitotic sister chromatid segregation	Biological Process	1	O75367
5	GO:0000819	sister chromatid segregation	Biological Process	6	P23258,B4DXN3,Q15050,Q9H444,O75367,P11388
5	GO:0051310	metaphase plate congression	Biological Process	2	Q15050,Q9H444
5	GO:0001578	microtubule bundle formation	Biological Process	1	A0A024RC67
5	GO:0007020	microtubule nucleation	Biological Process	1	P23258
5	GO:0031109	microtubule polymerization or depolymerization	Biological Process	2	P23258,P23396
5	GO:0031122	cytoplasmic microtubule organization	Biological Process	1	P23258
5	GO:0051293	establishment of spindle localization	Biological Process	1	P35579
5	GO:0070507	regulation of microtubule cytoskeleton organization	Biological Process	3	Q9H444,P23396,Q00610
5	GO:1902850	microtubule cytoskeleton organization involved in mitosis	Biological Process	3	P23258,Q00610,Q9H444
5	GO:0099111	microtubule-based transport	Biological Process	1	A0A2U3TZL8
5	GO:0098534	centriole assembly	Biological Process	1	P24941
5	GO:0044774	mitotic DNA integrity checkpoint	Biological Process	3	P24941,P78527,P11388
5	GO:0044819	mitotic G1/S transition checkpoint	Biological Process	2	P24941,P78527
5	GO:0072413	signal transduction involved in mitotic cell cycle checkpoint	Biological Process	2	P24941,P78527
5	GO:0000077	DNA damage checkpoint	Biological Process	4	P24941,Q9UMS4,P78527,P16104
5	GO:0072401	signal transduction involved in DNA integrity checkpoint	Biological Process	3	P24941,Q9UMS4,P78527
5	GO:0070527	platelet aggregation	Biological Process	2	P35579,P19105
5	GO:0051084	'de novo' posttranslational protein folding	Biological Process	2	Q15185,P11021
5	GO:0060904	regulation of protein folding in endoplasmic reticulum	Biological Process	1	P11021
5	GO:0051085	chaperone cofactor-dependent protein refolding	Biological Process	2	Q15185,P11021
5	GO:0002768	immune response-regulating cell surface receptor signaling pathway	Biological Process	4	P23396,O15144,P61160,O15143
5	GO:0000165	MAPK cascade	Biological Process	2	P23396,P31151
5	GO:0007249	I-kappaB kinase/NF-kappaB signaling	Biological Process	1	Q9NR30
5	GO:0007264	small GTPase mediated signal transduction	Biological Process	3	P24941,P61026,P62330
5	GO:0019932	second-messenger-mediated signaling	Biological Process	4	Q9BRL5,Q96SB3,O14958,P16615
5	GO:0031098	stress-activated protein kinase signaling cascade	Biological Process	1	P23396
5	GO:0031929	TOR signaling	Biological Process	1	P62753
5	GO:0038061	NIK/NF-kappaB signaling	Biological Process	2	P23396,O43707
5	GO:0042770	signal transduction in response to DNA damage	Biological Process	3	P24941,Q9UMS4,P78527
5	GO:0043491	protein kinase B signaling	Biological Process	1	P10599
5	GO:0072331	signal transduction by p53 class mediator	Biological Process	6	P24941,Q9Y5B9,Q15050,Q08945,P46087,Q9NWT1
5	GO:0097193	intrinsic apoptotic signaling pathway	Biological Process	4	P78527,P23396,P06733,P09874
5	GO:1902531	regulation of intracellular signal transduction	Biological Process	15	P62330,Q9NR30,P23396,P10599,O14958,P31151,O43707,Q9Y5B9,Q15050,Q08945,P46087,P24941,Q9NWT1,P06733,P09874
5	GO:1902532	negative regulation of intracellular signal transduction	Biological Process	2	O14958,P06733
5	GO:1902533	positive regulation of intracellular signal transduction	Biological Process	5	Q9NR30,P23396,P10599,P31151,O43707
5	GO:0006983	ER overload response	Biological Process	1	P11021
5	GO:0036499	PERK-mediated unfolded protein response	Biological Process	1	P11021
5	GO:0036500	ATF6-mediated unfolded protein response	Biological Process	1	P11021
5	GO:0007167	enzyme linked receptor protein signaling pathway	Biological Process	8	P18085,P09874,O14654,P24928,P11021,O15144,P61160,O15143
5	GO:0007219	Notch signaling pathway	Biological Process	1	Q9GZL7
5	GO:0007224	smoothened signaling pathway	Biological Process	1	Q8TDG2
5	GO:0007229	integrin-mediated signaling pathway	Biological Process	1	P35579
5	GO:0019221	cytokine-mediated signaling pathway	Biological Process	4	O43707,P22626,P17987,P63104
5	GO:0008277	regulation of G protein-coupled receptor signaling pathway	Biological Process	1	Q96SB3
5	GO:0038003	opioid receptor signaling pathway	Biological Process	1	Q96SB3
5	GO:0043401	steroid hormone mediated signaling pathway	Biological Process	1	P09874
5	GO:0008589	regulation of smoothened signaling pathway	Biological Process	1	Q8TDG2
5	GO:0030111	regulation of Wnt signaling pathway	Biological Process	1	P50402
5	GO:0033143	regulation of intracellular steroid hormone receptor signaling pathway	Biological Process	1	P09874
5	GO:0090092	regulation of transmembrane receptor protein serine/threonine kinase signaling pathway	Biological Process	2	P09874,P11021
5	GO:0098815	modulation of excitatory postsynaptic potential	Biological Process	1	P38919
5	GO:1900101	regulation of endoplasmic reticulum unfolded protein response	Biological Process	1	P11021
5	GO:2001233	regulation of apoptotic signaling pathway	Biological Process	5	P63104,P05141,P23396,P06733,P09874
5	GO:0033145	positive regulation of intracellular steroid hormone receptor signaling pathway	Biological Process	1	P09874
5	GO:0090100	positive regulation of transmembrane receptor protein serine/threonine kinase signaling pathway	Biological Process	1	P09874
5	GO:2001235	positive regulation of apoptotic signaling pathway	Biological Process	2	P63104,P23396
5	GO:0030178	negative regulation of Wnt signaling pathway	Biological Process	1	P50402
5	GO:0090101	negative regulation of transmembrane receptor protein serine/threonine kinase signaling pathway	Biological Process	1	P11021
5	GO:0090394	negative regulation of excitatory postsynaptic potential	Biological Process	1	P38919
5	GO:1900102	negative regulation of endoplasmic reticulum unfolded protein response	Biological Process	1	P11021
5	GO:2001234	negative regulation of apoptotic signaling pathway	Biological Process	2	P05141,P06733
5	GO:0030518	intracellular steroid hormone receptor signaling pathway	Biological Process	1	P09874
5	GO:0035357	peroxisome proliferator activated receptor signaling pathway	Biological Process	1	O43707
5	GO:0048384	retinoic acid receptor signaling pathway	Biological Process	1	O43707
5	GO:0036498	IRE1-mediated unfolded protein response	Biological Process	2	P11021,Q9Y5M8
5	GO:0060390	regulation of SMAD protein signal transduction	Biological Process	1	P09874
5	GO:0060391	positive regulation of SMAD protein signal transduction	Biological Process	1	P09874
5	GO:0097345	mitochondrial outer membrane permeabilization	Biological Process	2	P63104,P05141
5	GO:0030050	vesicle transport along actin filament	Biological Process	1	O43707
5	GO:0070252	actin-mediated cell contraction	Biological Process	5	P08590,P14649,P63316,P11055,Q9Y623
5	GO:1903115	regulation of actin filament-based movement	Biological Process	2	P63316,P16615
5	GO:0007411	axon guidance	Biological Process	1	P35580
5	GO:0007520	myoblast fusion	Biological Process	1	P35579
5	GO:0007346	regulation of mitotic cell cycle	Biological Process	10	P24941,P62753,Q96SB3,P68371,P23258,O75367,P11388,Q00610,P78527,Q9H444
5	GO:0045930	negative regulation of mitotic cell cycle	Biological Process	4	P24941,P62753,P11388,P78527
5	GO:0045931	positive regulation of mitotic cell cycle	Biological Process	1	O75367
5	GO:0010649	regulation of cell communication by electrical coupling	Biological Process	1	O14958
5	GO:0019228	neuronal action potential	Biological Process	1	Q7Z406
5	GO:0031669	cellular response to nutrient levels	Biological Process	1	P11021
5	GO:0086068	Purkinje myocyte to ventricular cardiac muscle cell communication	Biological Process	1	O14958
5	GO:0045200	establishment of neuroblast polarity	Biological Process	1	P61026
5	GO:0090162	establishment of epithelial cell polarity	Biological Process	1	P62330
5	GO:0035088	establishment or maintenance of apical/basal cell polarity	Biological Process	1	P18085
5	GO:0006915	apoptotic process	Biological Process	21	P62753,P18085,P63104,P30048,P78527,P11021,P23396,O43707,P12814,P11388,P62330,O00422,Q9Y3A2,P04406,O14578,P05141,P06733,P09874,P17987,A0A386NC25,P12236
5	GO:0043067	regulation of programmed cell death	Biological Process	17	P18085,P62753,P63104,P30048,P78527,P11021,P23396,O43707,P12814,O00422,P11388,Q9Y3A2,P04406,P05141,P06733,P09874,P17987
5	GO:0043068	positive regulation of programmed cell death	Biological Process	8	P62753,O00422,P11388,P78527,Q9Y3A2,P04406,P63104,P23396
5	GO:0043069	negative regulation of programmed cell death	Biological Process	8	P18085,P62753,P63104,P30048,P78527,P11021,P05141,P06733
5	GO:0070269	pyroptosis	Biological Process	1	Q08211
5	GO:0097300	programmed necrotic cell death	Biological Process	1	Q96HS1
5	GO:1902686	mitochondrial outer membrane permeabilization involved in programmed cell death	Biological Process	2	P63104,P05141
5	GO:1901214	regulation of neuron death	Biological Process	2	Q9H444,P09874
5	GO:1903201	regulation of oxidative stress-induced cell death	Biological Process	2	P10599,P09874
5	GO:1901216	positive regulation of neuron death	Biological Process	1	P09874
5	GO:0008631	intrinsic apoptotic signaling pathway in response to oxidative stress	Biological Process	1	P09874
5	GO:0036474	cell death in response to hydrogen peroxide	Biological Process	1	P10599
5	GO:0036475	neuron death in response to oxidative stress	Biological Process	1	P09874
5	GO:1903202	negative regulation of oxidative stress-induced cell death	Biological Process	1	P10599
5	GO:1901215	negative regulation of neuron death	Biological Process	1	Q9H444
5	GO:0051402	neuron apoptotic process	Biological Process	4	P09874,P04406,P11021,O14578
5	GO:0008039	synaptic target recognition	Biological Process	1	P63104
5	GO:0006333	chromatin assembly or disassembly	Biological Process	8	O75367,P16104,P16403,Q9P0M6,H0YHC3,Q92522,Q9Y5B9,P17096
5	GO:0034728	nucleosome organization	Biological Process	8	O75367,P16104,P16403,Q9P0M6,H0YHC3,Q92522,Q9Y5B9,P17096
5	GO:0006338	chromatin remodeling	Biological Process	2	P17096,B4DZC0
5	GO:0016569	covalent chromatin modification	Biological Process	3	P24941,O75367,P16403
5	GO:0070828	heterochromatin organization	Biological Process	1	P17096
5	GO:1902275	regulation of chromatin organization	Biological Process	4	P16403,P17096,Q92522,O75367
5	GO:1905268	negative regulation of chromatin organization	Biological Process	4	P16403,P17096,Q92522,O75367
5	GO:0051276	chromosome organization	Biological Process	34	P23258,P09874,P12956,Q15185,P13010,P78527,E7ESD9,P11388,O75367,P16104,P16403,Q9P0M6,H0YHC3,Q92522,Q5U071,E9PCY5,B9EG90,Q04837,P17096,Q96KK5,Q9Y5B9,Q9NY12,P35251,B4DXN3,Q15050,Q9H444,P24941,O75531,Q9H0A0,P17987,Q08211,B4DZC0,P22626,B0AZQ4
5	GO:0007010	cytoskeleton organization	Biological Process	38	P35579,P23258,P04406,P68371,A0A2U3TZL8,A0A024RC67,O43707,P12814,C9JAM8,B1AK87,A8K0T9,C9JUG7,E9PLJ3,F6RFD5,Q96SB3,Q5HYL6,K7EJ44,O75369,Q59H95,Q16643,P24941,O14578,F8WDD7,O15144,Q9H444,P62330,P35580,Q7Z406,P23396,B4DJT7,B4DXW1,B2R4D5,P61160,O15143,A0A1W2PNV4,O14958,P11055,Q00610
5	GO:0007033	vacuole organization	Biological Process	1	Q9H444
5	GO:0006997	nucleus organization	Biological Process	4	O75531,P50402,Q9H444,Q92621
5	GO:0007005	mitochondrion organization	Biological Process	11	Q04837,P12236,Q8TAA5,P09874,P25705,P49916,Q7Z406,P63104,P05141,H0Y2W2,P30048
5	GO:0007029	endoplasmic reticulum organization	Biological Process	1	P61026
5	GO:0007030	Golgi organization	Biological Process	2	P63104,O14578
5	GO:0010638	positive regulation of organelle organization	Biological Process	15	F6RFD5,P62330,P23396,P17987,P13010,O75367,B4DXW1,F8WDD7,B2R4D5,O15144,P61160,O15143,A0A1W2PNV4,P63104,P22626
5	GO:0010639	negative regulation of organelle organization	Biological Process	15	B1AK87,A8K0T9,C9JUG7,P16403,P17096,Q92522,Q9H0A0,O75367,Q5HYL6,P49916,P05141,Q9H444,P09874,P13010,P11388
5	GO:0016050	vesicle organization	Biological Process	1	Q9H444
5	GO:0033043	regulation of organelle organization	Biological Process	32	B1AK87,A8K0T9,C9JUG7,Q96SB3,O14578,Q9H444,Q16643,F6RFD5,P62330,P23396,P16403,P17096,Q92522,P13010,Q9H0A0,P17987,O75367,B4DXW1,F8WDD7,B2R4D5,O15144,P61160,O15143,A0A1W2PNV4,Q5HYL6,Q00610,P49916,P63104,P05141,P09874,P22626,P11388
5	GO:0044782	cilium organization	Biological Process	3	P61160,P68371,P23258
5	GO:0048285	organelle fission	Biological Process	8	P23258,P11388,B4DXN3,Q15050,Q9H444,Q96SB3,P61160,O75367
5	GO:0048308	organelle inheritance	Biological Process	1	P63104
5	GO:0070925	organelle assembly	Biological Process	19	P62750,P30050,Q02878,A8K800,Q15050,P46087,P42677,A0A0B4J2E5,P24941,P61160,P63173,Q9H444,Q9NWU5,O14958,P11055,P23396,P35580,P68371,P23258
5	GO:0099084	postsynaptic specialization organization	Biological Process	1	P62330
5	GO:0006998	nuclear envelope organization	Biological Process	3	O75531,P50402,Q9H444
5	GO:0007009	plasma membrane organization	Biological Process	3	P35580,P35579,P16615
5	GO:0007032	endosome organization	Biological Process	1	Q9H444
5	GO:0000912	assembly of actomyosin apparatus involved in cytokinesis	Biological Process	1	A0A2U3TZL8
5	GO:0001325	formation of extrachromosomal circular DNA	Biological Process	1	P13010
5	GO:0051017	actin filament bundle assembly	Biological Process	3	O43707,P12814,C9JAM8
5	GO:0031497	chromatin assembly	Biological Process	7	O75367,P16104,P16403,Q9P0M6,H0YHC3,Q92522,P17096
5	GO:0007416	synapse assembly	Biological Process	1	P62330
5	GO:0030031	cell projection assembly	Biological Process	7	P35580,P61160,O15144,Q96SB3,P62330,P68371,P23258
5	GO:0034329	cell junction assembly	Biological Process	3	A0A024R1X8,P12814,O43707
5	GO:0045110	intermediate filament bundle assembly	Biological Process	1	B4DJT7
5	GO:0065003	protein-containing complex assembly	Biological Process	56	P62750,P30050,Q02878,A8K800,Q15050,P46087,P42677,A0A0B4J2E5,Q9UMS4,Q6P2Q9,O94906,P62314,O75533,P62318,P62306,E9PMI6,I3L2C7,P55769,O75367,P16104,P16403,Q9P0M6,H0YHC3,Q92522,B1AK87,A8K0T9,C9JUG7,P09874,P38159,Q13243,Q15185,P23258,P17987,F8WDD7,O15144,Q08211,Q16643,P62330,P23396,B4DXW1,B2R4D5,P61160,O15143,A0A1W2PNV4,P63173,Q9NWU5,Q15717,Q9H444,P09496,Q00610,O14958,P14618,Q92621,Q5HYL6,P17096,Q9BYG3
5	GO:0090168	Golgi reassembly	Biological Process	1	P63104
5	GO:0099054	presynapse assembly	Biological Process	1	P62330
5	GO:0031498	chromatin disassembly	Biological Process	2	Q9Y5B9,P17096
5	GO:0032984	protein-containing complex disassembly	Biological Process	16	B1AK87,A8K0T9,C9JUG7,E9PLJ3,F6RFD5,Q96SB3,Q9Y5B9,P17096,I3L2G1,I3L397,Q5HYL6,O15235,P82921,Q9NWU5,Q96EL2,Q96A35
5	GO:0031344	regulation of cell projection organization	Biological Process	5	O15144,P11021,Q16643,P62330,P61160
5	GO:0031345	negative regulation of cell projection organization	Biological Process	1	P62330
5	GO:0031346	positive regulation of cell projection organization	Biological Process	4	O15144,P11021,Q16643,P61160
5	GO:0048858	cell projection morphogenesis	Biological Process	4	P61026,P35580,Q16643,P61160
5	GO:0120036	plasma membrane bounded cell projection organization	Biological Process	12	P35580,P61026,P61160,O15144,P11021,Q96SB3,P35579,Q16643,P62330,P18085,P68371,P23258
5	GO:0030832	regulation of actin filament length	Biological Process	15	B1AK87,A8K0T9,C9JUG7,O14578,Q16643,F6RFD5,P62330,B4DXW1,F8WDD7,B2R4D5,O15144,P61160,O15143,A0A1W2PNV4,Q5HYL6
5	GO:0008361	regulation of cell size	Biological Process	2	E9PMI6,Q16643
5	GO:0000902	cell morphogenesis	Biological Process	10	O75369,P61026,P35580,P35579,Q7Z406,P12814,Q16643,P61160,O43707,O15144
5	GO:0032990	cell part morphogenesis	Biological Process	6	P61026,P35580,Q16643,P61160,Q7Z406,Q04837
5	GO:0034332	adherens junction organization	Biological Process	2	P12814,P62330
5	GO:0045216	cell-cell junction organization	Biological Process	2	A0A024R1X8,O43707
5	GO:0006999	nuclear pore organization	Biological Process	1	Q92621
5	GO:0071824	protein-DNA complex subunit organization	Biological Process	9	O75367,P16104,P16403,Q9P0M6,H0YHC3,Q92522,P09874,Q9Y5B9,P17096
5	GO:0071826	ribonucleoprotein complex subunit organization	Biological Process	24	P62750,P30050,Q02878,A8K800,Q15050,P46087,P42677,A0A0B4J2E5,Q9UMS4,Q6P2Q9,O94906,P62314,O75533,P62318,P62306,E9PMI6,I3L2C7,P55769,P38159,Q13243,Q08211,P63173,Q9NWU5,Q15185
5	GO:0099558	maintenance of synapse structure	Biological Process	1	P62330
5	GO:0043163	cell envelope organization	Biological Process	1	Q86YZ3
5	GO:0050807	regulation of synapse organization	Biological Process	5	Q16643,P61160,P63104,P18085,P62330
5	GO:0099563	modification of synaptic structure	Biological Process	1	P35580
5	GO:0022604	regulation of cell morphogenesis	Biological Process	7	P35580,P35579,Q7Z406,Q16643,P61160,O43707,O15144
5	GO:0030100	regulation of endocytosis	Biological Process	2	P62330,O43707
5	GO:0043244	regulation of protein complex disassembly	Biological Process	6	B1AK87,A8K0T9,C9JUG7,F6RFD5,I3L397,Q5HYL6
5	GO:1902903	regulation of supramolecular fiber organization	Biological Process	16	B1AK87,A8K0T9,C9JUG7,O14578,Q16643,F6RFD5,P62330,P23396,B4DXW1,F8WDD7,B2R4D5,O15144,P61160,O15143,A0A1W2PNV4,Q5HYL6
5	GO:1903391	regulation of adherens junction organization	Biological Process	1	P62330
5	GO:1903729	regulation of plasma membrane organization	Biological Process	1	P35579
5	GO:0010771	negative regulation of cell morphogenesis involved in differentiation	Biological Process	1	O43707
5	GO:0031333	negative regulation of protein complex assembly	Biological Process	4	B1AK87,A8K0T9,C9JUG7,Q5HYL6
5	GO:0043242	negative regulation of protein complex disassembly	Biological Process	4	B1AK87,A8K0T9,C9JUG7,Q5HYL6
5	GO:1902904	negative regulation of supramolecular fiber organization	Biological Process	4	B1AK87,A8K0T9,C9JUG7,Q5HYL6
5	GO:0010770	positive regulation of cell morphogenesis involved in differentiation	Biological Process	3	Q16643,P61160,O15144
5	GO:0043243	positive regulation of protein complex disassembly	Biological Process	2	F6RFD5,I3L397
5	GO:1902905	positive regulation of supramolecular fiber organization	Biological Process	10	F6RFD5,P62330,P23396,B4DXW1,F8WDD7,B2R4D5,O15144,P61160,O15143,A0A1W2PNV4
5	GO:1903393	positive regulation of adherens junction organization	Biological Process	1	P62330
5	GO:0007006	mitochondrial membrane organization	Biological Process	3	P25705,P63104,P05141
5	GO:0010324	membrane invagination	Biological Process	1	P35579
5	GO:0033292	T-tubule organization	Biological Process	1	P16615
5	GO:0051205	protein insertion into membrane	Biological Process	1	P63104
5	GO:0061952	midbody abscission	Biological Process	1	Q9H444
5	GO:0090148	membrane fission	Biological Process	1	Q9H444
5	GO:0007015	actin filament organization	Biological Process	20	O43707,P12814,C9JAM8,B1AK87,A8K0T9,C9JUG7,E9PLJ3,F6RFD5,Q96SB3,O14578,F8WDD7,O15144,Q16643,P62330,B4DXW1,B2R4D5,P61160,O15143,A0A1W2PNV4,Q5HYL6
5	GO:0030239	myofibril assembly	Biological Process	3	O14958,P11055,P35580
5	GO:0045109	intermediate filament organization	Biological Process	1	B4DJT7
5	GO:0046785	microtubule polymerization	Biological Process	2	P23258,P23396
5	GO:0099174	regulation of presynapse organization	Biological Process	1	P62330
5	GO:0097061	dendritic spine organization	Biological Process	2	Q16643,P61160
5	GO:0099175	regulation of postsynapse organization	Biological Process	3	Q16643,P61160,P18085
5	GO:0099188	postsynaptic cytoskeleton organization	Biological Process	2	P35580,Q16643
5	GO:0031935	regulation of chromatin silencing	Biological Process	3	P16403,P17096,Q92522
5	GO:0031936	negative regulation of chromatin silencing	Biological Process	3	P16403,P17096,Q92522
5	GO:0035194	posttranscriptional gene silencing by RNA	Biological Process	5	Q08211,P22626,P24928,Q92621,Q15717
5	GO:0060147	regulation of posttranscriptional gene silencing	Biological Process	4	P24928,Q92621,Q15717,Q08211
5	GO:0060149	negative regulation of posttranscriptional gene silencing	Biological Process	1	Q15717
5	GO:0060966	regulation of gene silencing by RNA	Biological Process	4	P24928,Q92621,Q15717,Q08211
5	GO:0060967	negative regulation of gene silencing by RNA	Biological Process	1	Q15717
5	GO:0070918	production of small RNA involved in gene silencing by RNA	Biological Process	1	P22626
5	GO:0070922	small RNA loading onto RISC	Biological Process	1	Q08211
5	GO:0006873	cellular ion homeostasis	Biological Process	3	O14958,P16615,P12277
5	GO:0032465	regulation of cytokinesis	Biological Process	2	O14578,A0A024RC67
5	GO:0032467	positive regulation of cytokinesis	Biological Process	1	O14578
5	GO:0061640	cytoskeleton-dependent cytokinesis	Biological Process	5	P35580,Q9H444,O14578,A0A2U3TZL8,P61160
5	GO:0071156	regulation of cell cycle arrest	Biological Process	1	P24941
5	GO:0071158	positive regulation of cell cycle arrest	Biological Process	1	P24941
5	GO:0007052	mitotic spindle organization	Biological Process	3	Q00610,Q9H444,P23258
5	GO:0051225	spindle assembly	Biological Process	2	Q9H444,P23396
5	GO:0090224	regulation of spindle organization	Biological Process	2	Q00610,Q9H444
5	GO:0007063	regulation of sister chromatid cohesion	Biological Process	1	O75367
5	GO:0007064	mitotic sister chromatid cohesion	Biological Process	1	O75367
5	GO:0046605	regulation of centrosome cycle	Biological Process	1	Q9H444
5	GO:0007088	regulation of mitotic nuclear division	Biological Process	3	Q96SB3,O75367,Q9H444
5	GO:0070316	regulation of G0 to G1 transition	Biological Process	1	P45973
5	GO:1901987	regulation of cell cycle phase transition	Biological Process	6	P24941,Q96SB3,P68371,P23258,P78527,O75367
5	GO:0070317	negative regulation of G0 to G1 transition	Biological Process	1	P45973
5	GO:1901988	negative regulation of cell cycle phase transition	Biological Process	3	P24941,P78527,O75367
5	GO:1902410	mitotic cytokinetic process	Biological Process	1	Q9H444
5	GO:0044772	mitotic cell cycle phase transition	Biological Process	8	P62753,P24941,P68371,P23258,O14578,Q96SB3,Q9H444,P78527
5	GO:0044839	cell cycle G2/M phase transition	Biological Process	5	P68371,P24941,P23258,O14578,O75367
5	GO:0044843	cell cycle G1/S phase transition	Biological Process	3	P62753,P24941,P78527
5	GO:0034088	maintenance of mitotic sister chromatid cohesion	Biological Process	1	O75367
5	GO:0034091	regulation of maintenance of sister chromatid cohesion	Biological Process	1	O75367
5	GO:0034093	positive regulation of maintenance of sister chromatid cohesion	Biological Process	1	O75367
5	GO:0033260	nuclear DNA replication	Biological Process	1	P35251
5	GO:0000915	actomyosin contractile ring assembly	Biological Process	1	A0A2U3TZL8
5	GO:0010824	regulation of centrosome duplication	Biological Process	1	Q9H444
5	GO:0045840	positive regulation of mitotic nuclear division	Biological Process	1	O75367
5	GO:0000070	mitotic sister chromatid segregation	Biological Process	5	B4DXN3,Q15050,Q9H444,O75367,P23258
5	GO:0000281	mitotic cytokinesis	Biological Process	3	Q9H444,P35580,O14578
5	GO:0007076	mitotic chromosome condensation	Biological Process	1	B4DXN3
5	GO:0007080	mitotic metaphase plate congression	Biological Process	2	Q15050,Q9H444
5	GO:0007084	mitotic nuclear envelope reassembly	Biological Process	2	O75531,P50402
5	GO:0140014	mitotic nuclear division	Biological Process	6	P23258,B4DXN3,Q15050,Q9H444,Q96SB3,O75367
5	GO:0048278	vesicle docking	Biological Process	1	P61026
5	GO:0097711	ciliary basal body-plasma membrane docking	Biological Process	2	P68371,P23258
5	GO:0007286	spermatid development	Biological Process	1	Q08J23
5	GO:0048477	oogenesis	Biological Process	1	P62753
5	GO:1903918	regulation of actin filament severing	Biological Process	1	P35579
5	GO:0030866	cortical actin cytoskeleton organization	Biological Process	3	A0A2U3TZL8,P62330,O14578
5	GO:0031032	actomyosin structure organization	Biological Process	7	A0A2U3TZL8,O14958,P11055,P35580,P35579,Q7Z406,O14578
5	GO:0031532	actin cytoskeleton reorganization	Biological Process	1	P35579
5	GO:0032956	regulation of actin cytoskeleton organization	Biological Process	15	B1AK87,A8K0T9,C9JUG7,O14578,Q16643,F6RFD5,P62330,B4DXW1,F8WDD7,B2R4D5,O15144,P61160,O15143,A0A1W2PNV4,Q5HYL6
5	GO:0098974	postsynaptic actin cytoskeleton organization	Biological Process	2	P35580,Q16643
5	GO:0046879	hormone secretion	Biological Process	2	P05141,P12236
5	GO:0099643	signal release from synapse	Biological Process	1	P16615
5	GO:0017157	regulation of exocytosis	Biological Process	2	P16615,P61026
5	GO:0045055	regulated exocytosis	Biological Process	14	O43707,P12814,P68104,P68371,P12956,P61026,P14618,P31151,P13639,P61160,Q86YZ3,P13010,P16615,P35579
5	GO:0030073	insulin secretion	Biological Process	2	P05141,P12236
5	GO:0050708	regulation of protein secretion	Biological Process	6	P05141,P12236,Q08211,P35580,P62330,P04406
5	GO:0050714	positive regulation of protein secretion	Biological Process	4	Q08211,P04406,P35580,P62330
5	GO:0046928	regulation of neurotransmitter secretion	Biological Process	1	P16615
5	GO:0010720	positive regulation of cell development	Biological Process	6	P11021,Q9UMS4,Q16643,P13010,P61160,O15144
5	GO:0030858	positive regulation of epithelial cell differentiation	Biological Process	2	O75367,Q9P0M6
5	GO:1904762	positive regulation of myofibroblast differentiation	Biological Process	1	P09874
5	GO:0051280	negative regulation of release of sequestered calcium ion into cytosol	Biological Process	1	O14958
5	GO:2000637	positive regulation of gene silencing by miRNA	Biological Process	1	Q08211
5	GO:0045739	positive regulation of DNA repair	Biological Process	6	P09874,P23396,P61160,P78527,Q08211,P16104
5	GO:1902231	positive regulation of intrinsic apoptotic signaling pathway in response to DNA damage	Biological Process	1	P23396
5	GO:0010812	negative regulation of cell-substrate adhesion	Biological Process	1	O43707
5	GO:0010721	negative regulation of cell development	Biological Process	2	O43707,P62330
5	GO:0051209	release of sequestered calcium ion into cytosol	Biological Process	1	O14958
5	GO:1903845	negative regulation of cellular response to transforming growth factor beta stimulus	Biological Process	1	P11021
5	GO:1903298	negative regulation of hypoxia-induced intrinsic apoptotic signaling pathway	Biological Process	1	P06733
5	GO:1901017	negative regulation of potassium ion transmembrane transporter activity	Biological Process	1	O14958
5	GO:0045738	negative regulation of DNA repair	Biological Process	1	P23396
5	GO:1903206	negative regulation of hydrogen peroxide-induced cell death	Biological Process	1	P10599
5	GO:0090398	cellular senescence	Biological Process	3	P17096,P78527,P16104
5	GO:0002244	hematopoietic progenitor cell differentiation	Biological Process	5	P78527,P13010,Q15050,P13639,P11388
5	GO:0002521	leukocyte differentiation	Biological Process	4	P78527,P35579,P09874,P62753
5	GO:0010001	glial cell differentiation	Biological Process	1	Q9UMS4
5	GO:0022008	neurogenesis	Biological Process	14	P35580,P61026,P63104,P11021,P13639,Q96SB3,Q9UMS4,Q16643,O14578,Q5U071,P13010,P18085,P62330,P61160
5	GO:0030099	myeloid cell differentiation	Biological Process	6	P35579,P12814,P09874,P62753,Q5HYL6,P30048
5	GO:0030182	neuron differentiation	Biological Process	10	P61026,P35580,P63104,P11021,Q96SB3,Q9UMS4,Q16643,P18085,P62330,P61160
5	GO:0030855	epithelial cell differentiation	Biological Process	7	O75369,P31151,P61026,Q86YZ3,O75367,Q9P0M6,P31942
5	GO:0035051	cardiocyte differentiation	Biological Process	1	P35580
5	GO:0035914	skeletal muscle cell differentiation	Biological Process	2	P13639,P50402
5	GO:0036446	myofibroblast differentiation	Biological Process	1	P09874
5	GO:0042692	muscle cell differentiation	Biological Process	5	P35579,P16615,O14958,P11055,P35580
5	GO:0048863	stem cell differentiation	Biological Process	1	P13010
5	GO:0002326	B cell lineage commitment	Biological Process	1	P78527
5	GO:0002360	T cell lineage commitment	Biological Process	1	P78527
5	GO:0055059	asymmetric neuroblast division	Biological Process	1	P61026
5	GO:0000904	cell morphogenesis involved in differentiation	Biological Process	9	O75369,P61026,P35580,P35579,P12814,Q16643,P61160,O43707,O15144
5	GO:0002064	epithelial cell development	Biological Process	1	O75369
5	GO:0048666	neuron development	Biological Process	9	P61026,P35580,P63104,P11021,Q96SB3,Q16643,P18085,P62330,P61160
5	GO:0055001	muscle cell development	Biological Process	4	P16615,O14958,P11055,P35580
5	GO:0055006	cardiac cell development	Biological Process	1	P35580
5	GO:0060284	regulation of cell development	Biological Process	9	P11021,Q9UMS4,Q16643,Q5U071,P13010,P62330,P61160,O43707,O15144
5	GO:0061515	myeloid cell development	Biological Process	2	P62753,Q5HYL6
5	GO:0051900	regulation of mitochondrial depolarization	Biological Process	1	P09874
5	GO:0051279	regulation of release of sequestered calcium ion into cytosol	Biological Process	1	O14958
5	GO:0030856	regulation of epithelial cell differentiation	Biological Process	2	O75367,Q9P0M6
5	GO:1904760	regulation of myofibroblast differentiation	Biological Process	1	P09874
5	GO:1902803	regulation of synaptic vesicle transport	Biological Process	1	P16615
5	GO:0070302	regulation of stress-activated protein kinase signaling cascade	Biological Process	1	P23396
5	GO:1900034	regulation of cellular response to heat	Biological Process	2	Q15185,Q92621
5	GO:1900037	regulation of cellular response to hypoxia	Biological Process	1	P06733
5	GO:1900407	regulation of cellular response to oxidative stress	Biological Process	2	P10599,P09874
5	GO:1905897	regulation of response to endoplasmic reticulum stress	Biological Process	1	P11021
5	GO:2000772	regulation of cellular senescence	Biological Process	2	P78527,P17096
5	GO:2001020	regulation of response to DNA damage stimulus	Biological Process	6	P23396,Q08211,P16104,P09874,P61160,P78527
5	GO:1903844	regulation of cellular response to transforming growth factor beta stimulus	Biological Process	1	P11021
5	GO:1901016	regulation of potassium ion transmembrane transporter activity	Biological Process	1	O14958
5	GO:1903205	regulation of hydrogen peroxide-induced cell death	Biological Process	1	P10599
5	GO:0098722	asymmetric stem cell division	Biological Process	1	P61026
5	GO:0048103	somatic stem cell division	Biological Process	1	P61026
5	GO:0007016	cytoskeletal anchoring at plasma membrane	Biological Process	1	O75369
5	GO:0072595	maintenance of protein localization in organelle	Biological Process	2	P11021,P10599
5	GO:0006974	cellular response to DNA damage stimulus	Biological Process	23	B4DEB2,P16104,P09874,P49916,P23396,B5BUB1,Q9Y5B9,Q08945,P24941,M0R0Y3,E7ESD9,Q9UMS4,P35251,P24928,P17096,P13010,P78527,P12956,Q08211,P61160,P11388,P45973,A0A0C4DFX7
5	GO:0009267	cellular response to starvation	Biological Process	1	P11021
5	GO:0010610	regulation of mRNA stability involved in response to stress	Biological Process	1	Q9NZI8
5	GO:0034599	cellular response to oxidative stress	Biological Process	6	P30048,P23396,P24941,P10599,P09874,P16615
5	GO:0034605	cellular response to heat	Biological Process	4	Q15185,Q92621,P16615,P11021
5	GO:0034976	response to endoplasmic reticulum stress	Biological Process	4	P11021,Q9Y5M8,P16615,P13639
5	GO:0035967	cellular response to topologically incorrect protein	Biological Process	2	Q9Y5M8,P11021
5	GO:0043620	regulation of DNA-templated transcription in response to stress	Biological Process	1	P11021
5	GO:0071456	cellular response to hypoxia	Biological Process	1	P06733
5	GO:0071470	cellular response to osmotic stress	Biological Process	2	P12956,P13010
5	GO:0035690	cellular response to drug	Biological Process	7	P23396,O14958,Q96SB3,P24941,P10599,Q9NW64,P11021
5	GO:0060326	cell chemotaxis	Biological Process	1	P31151
5	GO:0071229	cellular response to acid chemical	Biological Process	1	P13010
5	GO:0071236	cellular response to antibiotic	Biological Process	4	P61160,P23396,P10599,P11021
5	GO:0071241	cellular response to inorganic substance	Biological Process	4	P11021,P09874,P24941,P38919
5	GO:0071310	cellular response to organic substance	Biological Process	29	Q9Y5M8,P11021,P09874,O14654,P24928,P63104,P61026,P14618,Q13243,P78527,O43707,P22626,P17987,P61160,Q6P2Q9,O14958,Q96SB3,P04406,O75369,P38159,Q08211,P23396,P50402,P68104,P13010,P62330,P38919,P13639,P05141
5	GO:0071453	cellular response to oxygen levels	Biological Process	1	P06733
5	GO:0071466	cellular response to xenobiotic stimulus	Biological Process	3	Q15185,O14958,Q96SB3
5	GO:0097237	cellular response to toxic substance	Biological Process	2	P23396,P10599
5	GO:1901699	cellular response to nitrogen compound	Biological Process	12	O14654,P09874,P61026,P14618,Q13243,P78527,P61160,O14958,Q96SB3,P11021,Q08211,P24941
5	GO:1901701	cellular response to oxygen-containing compound	Biological Process	15	O14654,P09874,P61026,P14618,Q13243,P78527,P30048,P61160,P23396,Q6P2Q9,P11021,Q96SB3,P13010,P24941,P10599
5	GO:0071219	cellular response to molecule of bacterial origin	Biological Process	1	Q6P2Q9
5	GO:0010506	regulation of autophagy	Biological Process	3	P04406,Q9H444,P68104
5	GO:0010507	negative regulation of autophagy	Biological Process	1	Q9H444
5	GO:0016236	macroautophagy	Biological Process	3	P04406,Q9H444,Q96HS1
5	GO:0061684	chaperone-mediated autophagy	Biological Process	1	P68104
5	GO:0030262	apoptotic nuclear changes	Biological Process	1	P11388
5	GO:2001270	regulation of cysteine-type endopeptidase activity involved in execution phase of apoptosis	Biological Process	1	P23396
5	GO:2001272	positive regulation of cysteine-type endopeptidase activity involved in execution phase of apoptosis	Biological Process	1	P23396
5	GO:0008406	gonad development	Biological Process	1	P11021
5	GO:0046545	development of primary female sexual characteristics	Biological Process	1	P11021
5	GO:0001890	placenta development	Biological Process	2	P30048,P62753
5	GO:0000712	resolution of meiotic recombination intermediates	Biological Process	1	P11388
5	GO:0007127	meiosis I	Biological Process	1	P11388
5	GO:0007160	cell-matrix adhesion	Biological Process	1	P12814
5	GO:0034446	substrate adhesion-dependent cell spreading	Biological Process	2	O43707,O15144
5	GO:0007159	leukocyte cell-cell adhesion	Biological Process	1	P23396
5	GO:0034109	homotypic cell-cell adhesion	Biological Process	2	P35579,P19105
5	GO:0098742	cell-cell adhesion via plasma-membrane adhesion molecules	Biological Process	1	Q68DY8
5	GO:0086029	Purkinje myocyte to ventricular cardiac muscle cell signaling	Biological Process	1	O14958
5	GO:0099537	trans-synaptic signaling	Biological Process	4	Q16643,Q96SB3,P38919,P16615
5	GO:0016055	Wnt signaling pathway	Biological Process	2	Q00610,P50402
5	GO:0099565	chemical synaptic transmission, postsynaptic	Biological Process	1	P38919
5	GO:0090276	regulation of peptide hormone secretion	Biological Process	2	P05141,P12236
5	GO:0050804	modulation of chemical synaptic transmission	Biological Process	4	Q16643,P38919,P16615,Q96SB3
5	GO:0032479	regulation of type I interferon production	Biological Process	4	Q08211,P12956,P13010,P78527
5	GO:0032661	regulation of interleukin-18 production	Biological Process	1	Q08211
5	GO:0032663	regulation of interleukin-2 production	Biological Process	1	P23396
5	GO:0032675	regulation of interleukin-6 production	Biological Process	1	Q08211
5	GO:0042035	regulation of cytokine biosynthetic process	Biological Process	3	Q9NZI8,Q9Y6M1,O00425
5	GO:0050707	regulation of cytokine secretion	Biological Process	2	Q08211,P04406
5	GO:1903555	regulation of tumor necrosis factor superfamily cytokine production	Biological Process	1	Q08211
5	GO:0032481	positive regulation of type I interferon production	Biological Process	4	Q08211,P12956,P13010,P78527
5	GO:0032741	positive regulation of interleukin-18 production	Biological Process	1	Q08211
5	GO:0032743	positive regulation of interleukin-2 production	Biological Process	1	P23396
5	GO:0032755	positive regulation of interleukin-6 production	Biological Process	1	Q08211
5	GO:0050715	positive regulation of cytokine secretion	Biological Process	2	Q08211,P04406
5	GO:1903557	positive regulation of tumor necrosis factor superfamily cytokine production	Biological Process	1	Q08211
5	GO:0032607	interferon-alpha production	Biological Process	1	Q08211
5	GO:0032608	interferon-beta production	Biological Process	1	Q08211
5	GO:0072641	type I interferon secretion	Biological Process	1	Q08211
5	GO:0072604	interleukin-6 secretion	Biological Process	1	Q08211
5	GO:1990774	tumor necrosis factor secretion	Biological Process	1	Q08211
5	GO:0032640	tumor necrosis factor production	Biological Process	1	Q08211
5	GO:0006936	muscle contraction	Biological Process	13	P63316,Q7Z406,P16615,P13639,P11055,Q7Z554,O14958,P08590,P14649,Q9Y623,P06733,P19105,P50402
5	GO:0014896	muscle hypertrophy	Biological Process	2	P09874,P16615
5	GO:0090075	relaxation of muscle	Biological Process	1	P16615
5	GO:0090257	regulation of muscle system process	Biological Process	7	P63316,Q7Z554,P08590,P09874,O14958,P16615,P06733
5	GO:0003015	heart process	Biological Process	4	P16615,P08590,O14958,P63316
5	GO:0008015	blood circulation	Biological Process	4	P16615,P08590,O14958,P63316
5	GO:0002086	diaphragm contraction	Biological Process	1	P63316
5	GO:0007600	sensory perception	Biological Process	2	Q7Z406,P63173
5	GO:0031644	regulation of neurological system process	Biological Process	1	P38919
5	GO:0050890	cognition	Biological Process	4	P18085,Q96SB3,P38919,P61160
5	GO:0050905	neuromuscular process	Biological Process	1	P35580
5	GO:1903522	regulation of blood circulation	Biological Process	3	P16615,P08590,O14958
5	GO:0009792	embryo development ending in birth or egg hatching	Biological Process	8	P35580,P35579,Q16643,Q08J23,P78527,Q6DKI1,Q9UMS4,P38919
5	GO:0048568	embryonic organ development	Biological Process	2	P63173,P38919
5	GO:0061053	somite development	Biological Process	1	P78527
5	GO:0001501	skeletal system development	Biological Process	2	P38919,P63173
5	GO:0001944	vasculature development	Biological Process	4	P35579,P31151,P35580,P14618
5	GO:0007399	nervous system development	Biological Process	21	P35580,P61026,P12956,P18085,Q9P0M6,P13010,P78527,P63104,P11021,P13639,Q96SB3,P12277,P16104,Q9NZI8,Q9UMS4,Q16643,O14578,Q5U071,P62330,P61160,Q9Y3A2
5	GO:0007417	central nervous system development	Biological Process	12	P12956,P18085,Q9P0M6,P13010,P78527,P12277,P11021,P35580,Q96SB3,P16104,Q9NZI8,Q9UMS4
5	GO:0021591	ventricular system development	Biological Process	1	P35580
5	GO:0021761	limbic system development	Biological Process	1	Q96SB3
5	GO:0048880	sensory system development	Biological Process	1	P35580
5	GO:0061008	hepaticobiliary system development	Biological Process	4	P14618,P62330,O14578,Q13243
5	GO:0061458	reproductive system development	Biological Process	4	P11021,P62753,P30048,Q96SB3
5	GO:0072358	cardiovascular system development	Biological Process	4	P35579,P31151,P35580,P14618
5	GO:0072359	circulatory system development	Biological Process	7	P35579,P31151,P35580,P78527,P08590,P63316,P14618
5	GO:0060173	limb development	Biological Process	1	P11055
5	GO:0051960	regulation of nervous system development	Biological Process	8	P11021,Q9UMS4,Q16643,Q5U071,P13010,P62330,P61160,P63104
5	GO:1901342	regulation of vasculature development	Biological Process	1	P14618
5	GO:2000027	regulation of animal organ morphogenesis	Biological Process	1	Q00610
5	GO:0009952	anterior/posterior pattern specification	Biological Process	1	P78527
5	GO:0035282	segmentation	Biological Process	1	P78527
5	GO:0048820	hair follicle maturation	Biological Process	1	Q08J23
5	GO:0036438	maintenance of lens transparency	Biological Process	1	Q9H444
5	GO:0033561	regulation of water loss via skin	Biological Process	1	Q86YZ3
5	GO:0003009	skeletal muscle contraction	Biological Process	5	P63316,Q7Z406,P16615,P13639,P11055
5	GO:0010594	regulation of endothelial cell migration	Biological Process	1	P25705
5	GO:0051547	regulation of keratinocyte migration	Biological Process	1	P62330
5	GO:0010595	positive regulation of endothelial cell migration	Biological Process	1	P25705
5	GO:0051549	positive regulation of keratinocyte migration	Biological Process	1	P62330
5	GO:0010613	positive regulation of cardiac muscle hypertrophy	Biological Process	1	P09874
5	GO:0050769	positive regulation of neurogenesis	Biological Process	5	P11021,Q9UMS4,Q16643,P61160,P13010
5	GO:0045823	positive regulation of heart contraction	Biological Process	1	P16615
5	GO:0045766	positive regulation of angiogenesis	Biological Process	1	P14618
5	GO:0050768	negative regulation of neurogenesis	Biological Process	1	P62330
5	GO:0045822	negative regulation of heart contraction	Biological Process	1	P16615
5	GO:0010631	epithelial cell migration	Biological Process	3	P35579,P25705,P62330
5	GO:0003208	cardiac ventricle morphogenesis	Biological Process	2	P08590,P63316
5	GO:0001736	establishment of planar polarity	Biological Process	1	Q00610
5	GO:0003007	heart morphogenesis	Biological Process	2	P08590,P63316
5	GO:0048562	embryonic organ morphogenesis	Biological Process	2	P63173,P38919
5	GO:0048644	muscle organ morphogenesis	Biological Process	2	P08590,P63316
5	GO:0048705	skeletal system morphogenesis	Biological Process	1	P38919
5	GO:0090596	sensory organ morphogenesis	Biological Process	1	P63173
5	GO:0045765	regulation of angiogenesis	Biological Process	1	P14618
5	GO:1905330	regulation of morphogenesis of an epithelium	Biological Process	1	Q00610
5	GO:0035108	limb morphogenesis	Biological Process	1	P11055
5	GO:0035113	embryonic appendage morphogenesis	Biological Process	1	P11055
5	GO:0048514	blood vessel morphogenesis	Biological Process	3	P35579,P31151,P14618
5	GO:0007369	gastrulation	Biological Process	1	P62753
5	GO:0042474	middle ear morphogenesis	Biological Process	1	P63173
5	GO:0002009	morphogenesis of an epithelium	Biological Process	2	P61026,Q00610
5	GO:0060415	muscle tissue morphogenesis	Biological Process	2	P08590,P63316
5	GO:0002040	sprouting angiogenesis	Biological Process	1	P14618
5	GO:0090128	regulation of synapse maturation	Biological Process	1	P63104
5	GO:0060840	artery development	Biological Process	1	P35580
5	GO:0060976	coronary vasculature development	Biological Process	1	P35580
5	GO:0003231	cardiac ventricle development	Biological Process	2	P08590,P63316
5	GO:0007498	mesoderm development	Biological Process	1	P63173
5	GO:0008544	epidermis development	Biological Process	7	O75369,P31151,Q86YZ3,O75367,Q9P0M6,Q08J23,P16615
5	GO:0060429	epithelium development	Biological Process	10	P78527,O75369,P31151,P31942,P61026,Q86YZ3,O75367,Q9P0M6,Q08J23,Q00610
5	GO:0060537	muscle tissue development	Biological Process	8	Q7Z406,P14649,O75369,P13639,P50402,P35580,P08590,P63316
5	GO:0048813	dendrite morphogenesis	Biological Process	2	Q16643,P61160
5	GO:0050773	regulation of dendrite development	Biological Process	3	P62330,Q16643,P61160
5	GO:1900006	positive regulation of dendrite development	Biological Process	2	Q16643,P61160
5	GO:2000171	negative regulation of dendrite development	Biological Process	1	P62330
5	GO:0021762	substantia nigra development	Biological Process	2	P12277,P11021
5	GO:0031100	animal organ regeneration	Biological Process	2	Q13243,P14618
5	GO:0007420	brain development	Biological Process	11	P12277,P11021,P35580,Q96SB3,P16104,Q9NZI8,P12956,P18085,Q9P0M6,P13010,P78527
5	GO:0007423	sensory organ development	Biological Process	2	P63173,P35580
5	GO:0007507	heart development	Biological Process	4	P35580,P08590,P63316,P78527
5	GO:0007517	muscle organ development	Biological Process	8	Q7Z406,P14649,O75369,P13639,P50402,P08590,P63316,P11055
5	GO:0043588	skin development	Biological Process	6	O75369,P31151,Q86YZ3,O75367,Q9P0M6,Q08J23
5	GO:0048732	gland development	Biological Process	5	P14618,P62330,O14578,P78527,Q13243
5	GO:0060997	dendritic spine morphogenesis	Biological Process	2	Q16643,P61160
5	GO:0060998	regulation of dendritic spine development	Biological Process	3	Q16643,P61160,P62330
5	GO:0060999	positive regulation of dendritic spine development	Biological Process	2	Q16643,P61160
5	GO:0048701	embryonic cranial skeleton morphogenesis	Biological Process	1	P38919
5	GO:0045604	regulation of epidermal cell differentiation	Biological Process	2	O75367,Q9P0M6
5	GO:0045606	positive regulation of epidermal cell differentiation	Biological Process	2	O75367,Q9P0M6
5	GO:0030334	regulation of cell migration	Biological Process	5	P31151,O43707,P11021,P25705,P62330
5	GO:0030335	positive regulation of cell migration	Biological Process	5	P31151,P25705,P62330,O43707,P11021
5	GO:0001667	ameboidal-type cell migration	Biological Process	3	P35579,P25705,P62330
5	GO:0001764	neuron migration	Biological Process	1	P35580
5	GO:0006929	substrate-dependent cell migration	Biological Process	1	P35580
5	GO:0035890	exit from host	Biological Process	1	Q9H444
5	GO:0050434	positive regulation of viral transcription	Biological Process	2	Q08211,P24928
5	GO:1903902	positive regulation of viral life cycle	Biological Process	2	P11388,Q9H444
5	GO:1904973	positive regulation of viral translation	Biological Process	1	Q08211
5	GO:0006293	nucleotide-excision repair, preincision complex stabilization	Biological Process	1	P09874
5	GO:0032273	positive regulation of protein polymerization	Biological Process	9	P62330,P23396,B4DXW1,F8WDD7,B2R4D5,O15144,P61160,O15143,A0A1W2PNV4
5	GO:2000234	positive regulation of rRNA processing	Biological Process	2	Q8TED0,Q15061
5	GO:0010592	positive regulation of lamellipodium assembly	Biological Process	1	O15144
5	GO:1900026	positive regulation of substrate adhesion-dependent cell spreading	Biological Process	1	O15144
5	GO:1903039	positive regulation of leukocyte cell-cell adhesion	Biological Process	1	P23396
5	GO:0050729	positive regulation of inflammatory response	Biological Process	1	Q08211
5	GO:0046833	positive regulation of RNA export from nucleus	Biological Process	1	Q08211
5	GO:0046824	positive regulation of nucleocytoplasmic transport	Biological Process	3	Q9NW64,P50402,Q08211
5	GO:0032414	positive regulation of ion transmembrane transporter activity	Biological Process	1	O43707
5	GO:0034767	positive regulation of ion transmembrane transport	Biological Process	1	O43707
5	GO:0010765	positive regulation of sodium ion transport	Biological Process	1	O43707
5	GO:0048549	positive regulation of pinocytosis	Biological Process	1	O43707
5	GO:0002793	positive regulation of peptide secretion	Biological Process	4	Q08211,P35580,P62330,P04406
5	GO:1904591	positive regulation of protein import	Biological Process	1	Q9NW64
5	GO:1900740	positive regulation of protein insertion into mitochondrial membrane involved in apoptotic signaling pathway	Biological Process	1	P63104
5	GO:0042307	positive regulation of protein import into nucleus	Biological Process	1	Q9NW64
5	GO:0046827	positive regulation of protein export from nucleus	Biological Process	2	P50402,Q9NW64
5	GO:1904871	positive regulation of protein localization to Cajal body	Biological Process	1	P17987
5	GO:1903078	positive regulation of protein localization to plasma membrane	Biological Process	2	P62330,Q96SB3
5	GO:1904778	positive regulation of protein localization to cell cortex	Biological Process	1	Q96SB3
5	GO:1903901	negative regulation of viral life cycle	Biological Process	2	O75531,Q12906
5	GO:0061045	negative regulation of wound healing	Biological Process	1	A0A0F7G8J1
5	GO:1901032	negative regulation of response to reactive oxygen species	Biological Process	1	P10599
5	GO:0046823	negative regulation of nucleocytoplasmic transport	Biological Process	1	P10599
5	GO:0032413	negative regulation of ion transmembrane transporter activity	Biological Process	1	O14958
5	GO:0034766	negative regulation of ion transmembrane transport	Biological Process	1	O14958
5	GO:0043267	negative regulation of potassium ion transport	Biological Process	1	O14958
5	GO:0051926	negative regulation of calcium ion transport	Biological Process	1	O14958
5	GO:0048261	negative regulation of receptor-mediated endocytosis	Biological Process	1	P62330
5	GO:0042730	fibrinolysis	Biological Process	1	A0A0F7G8J1
5	GO:0046826	negative regulation of protein export from nucleus	Biological Process	1	P10599
5	GO:1903077	negative regulation of protein localization to plasma membrane	Biological Process	1	Q00610
5	GO:1900024	regulation of substrate adhesion-dependent cell spreading	Biological Process	2	O43707,O15144
5	GO:1903037	regulation of leukocyte cell-cell adhesion	Biological Process	1	P23396
5	GO:0070201	regulation of establishment of protein localization	Biological Process	11	P05141,P12236,Q08211,Q9NW64,P10599,P50402,P35580,P62330,P04406,P63104,P17987
5	GO:1903827	regulation of cellular protein localization	Biological Process	10	Q9NW64,P10599,P50402,P09874,P63104,Q00610,P62330,Q96SB3,O75367,P17987
5	GO:0032239	regulation of nucleobase-containing compound transport	Biological Process	1	Q08211
5	GO:0032386	regulation of intracellular transport	Biological Process	6	P63316,Q9NW64,P10599,P50402,Q08211,P16615
5	GO:0034762	regulation of transmembrane transport	Biological Process	2	O14958,O43707
5	GO:0043269	regulation of ion transport	Biological Process	2	O14958,O43707
5	GO:0051046	regulation of secretion	Biological Process	8	P05141,P12236,P61026,Q08211,P35580,P62330,P04406,P16615
5	GO:0051588	regulation of neurotransmitter transport	Biological Process	1	P16615
5	GO:0090087	regulation of peptide transport	Biological Process	9	P05141,P12236,Q08211,Q9NW64,P10599,P50402,P35580,P62330,P04406
5	GO:0098693	regulation of synaptic vesicle cycle	Biological Process	1	P16615
5	GO:1901028	regulation of mitochondrial outer membrane permeabilization involved in apoptotic signaling pathway	Biological Process	2	P63104,P05141
5	GO:1902683	regulation of receptor localization to synapse	Biological Process	1	Q16643
5	GO:0050792	regulation of viral process	Biological Process	6	O75531,Q12906,P11388,Q08211,P24928,Q9H444
5	GO:0050691	regulation of defense response to virus by host	Biological Process	1	Q08211
5	GO:0010990	regulation of SMAD protein complex assembly	Biological Process	1	P09874
5	GO:0032271	regulation of protein polymerization	Biological Process	14	B1AK87,A8K0T9,C9JUG7,Q16643,P62330,P23396,B4DXW1,F8WDD7,B2R4D5,O15144,P61160,O15143,A0A1W2PNV4,Q5HYL6
5	GO:1905606	regulation of presynapse assembly	Biological Process	1	P62330
5	GO:0120032	regulation of plasma membrane bounded cell projection assembly	Biological Process	2	O15144,P62330
5	GO:2000232	regulation of rRNA processing	Biological Process	2	Q8TED0,Q15061
5	GO:0090169	regulation of spindle assembly	Biological Process	1	Q9H444
5	GO:1902116	negative regulation of organelle assembly	Biological Process	1	Q9H444
5	GO:2000785	regulation of autophagosome assembly	Biological Process	1	Q9H444
5	GO:1904430	negative regulation of t-circle formation	Biological Process	1	P13010
5	GO:0050727	regulation of inflammatory response	Biological Process	2	A0A3G2LMJ8,Q08211
5	GO:0010611	regulation of cardiac muscle hypertrophy	Biological Process	1	P09874
5	GO:0014733	regulation of skeletal muscle adaptation	Biological Process	2	P16615,P63316
5	GO:0031347	regulation of defense response	Biological Process	5	A0A3G2LMJ8,P12956,P13010,P78527,Q08211
5	GO:1902882	regulation of response to oxidative stress	Biological Process	3	O75367,P10599,P09874
5	GO:1903034	regulation of response to wounding	Biological Process	3	A0A0F7G8J1,P35579,A0A3S8NFS6
5	GO:2000266	regulation of blood coagulation, intrinsic pathway	Biological Process	1	A0A3S8NFS6
5	GO:0098909	regulation of cardiac muscle cell action potential involved in regulation of contraction	Biological Process	1	P16615
5	GO:0014898	cardiac muscle hypertrophy in response to stress	Biological Process	1	P16615
5	GO:0006954	inflammatory response	Biological Process	4	A0A3G2LMJ8,Q5U071,Q08211,Q13151
5	GO:0006972	hyperosmotic response	Biological Process	2	P12956,P13010
5	GO:0009651	response to salt stress	Biological Process	2	P12956,P13010
5	GO:0000302	response to reactive oxygen species	Biological Process	6	P30048,P13639,P23396,P24941,P10599,P31151
5	GO:0042060	wound healing	Biological Process	8	P35580,P35579,P45973,A0A0F7G8J1,P63104,P14618,P19105,A0A3S8NFS6
5	GO:0048678	response to axon injury	Biological Process	1	P18085
5	GO:0006986	response to unfolded protein	Biological Process	2	Q9Y5M8,P11021
5	GO:0031667	response to nutrient levels	Biological Process	3	P14618,P11021,P13639
5	GO:0002237	response to molecule of bacterial origin	Biological Process	6	P16615,Q5U071,P31151,P30048,Q13151,Q6P2Q9
5	GO:0009416	response to light stimulus	Biological Process	1	P09874
5	GO:0010212	response to ionizing radiation	Biological Process	6	P09874,P78527,P12956,P16104,P13010,P11021
5	GO:0071478	cellular response to radiation	Biological Process	5	P09874,P12956,P16104,P13010,P11021
5	GO:0036293	response to decreased oxygen levels	Biological Process	3	O43707,P14618,P06733
5	GO:0032355	response to estradiol	Biological Process	3	Q96SB3,P13639,O15143
5	GO:0032870	cellular response to hormone stimulus	Biological Process	7	O14654,P09874,P61026,P14618,Q13243,P78527,Q96SB3
5	GO:0034694	response to prostaglandin	Biological Process	1	Q96SB3
5	GO:0043434	response to peptide hormone	Biological Process	6	O14654,P09874,P61026,P14618,Q13243,P78527
5	GO:0048545	response to steroid hormone	Biological Process	2	P09874,Q96SB3
5	GO:0071364	cellular response to epidermal growth factor stimulus	Biological Process	2	P68104,Q96SB3
5	GO:0044344	cellular response to fibroblast growth factor stimulus	Biological Process	1	P24928
5	GO:0071417	cellular response to organonitrogen compound	Biological Process	10	O14654,P09874,P61026,P14618,Q13243,P78527,P61160,O14958,Q96SB3,P11021
5	GO:0071560	cellular response to transforming growth factor beta stimulus	Biological Process	2	P09874,P11021
5	GO:1990090	cellular response to nerve growth factor stimulus	Biological Process	4	P38919,P13639,P62330,P11021
5	GO:0043200	response to amino acid	Biological Process	1	Q96SB3
5	GO:0051593	response to folic acid	Biological Process	1	P13639
5	GO:0070542	response to fatty acid	Biological Process	2	Q96SB3,P13010
5	GO:0033273	response to vitamin	Biological Process	1	P13639
5	GO:0035094	response to nicotine	Biological Process	1	Q96SB3
5	GO:0036270	response to diuretic	Biological Process	1	O14958
5	GO:0042542	response to hydrogen peroxide	Biological Process	4	P23396,P10599,P13639,P30048
5	GO:0045471	response to ethanol	Biological Process	3	P49411,P13639,P61160
5	GO:0072347	response to anesthetic	Biological Process	2	P11021,Q96SB3
5	GO:0097332	response to antipsychotic drug	Biological Process	1	Q96SB3
5	GO:0097366	response to bronchodilator	Biological Process	2	Q96SB3,P24941
5	GO:1904373	response to kainic acid	Biological Process	1	Q96SB3
5	GO:0001975	response to amphetamine	Biological Process	1	Q96SB3
5	GO:0031000	response to caffeine	Biological Process	1	O14958
5	GO:0042220	response to cocaine	Biological Process	1	P11021
5	GO:0043278	response to morphine	Biological Process	1	Q96SB3
5	GO:0097338	response to clozapine	Biological Process	1	Q96SB3
5	GO:0005513	detection of calcium ion	Biological Process	1	O14958
5	GO:0046683	response to organophosphorus	Biological Process	1	P11021
5	GO:0010243	response to organonitrogen compound	Biological Process	11	Q96SB3,O14654,P11021,P09874,P61026,P14618,Q13243,P78527,P61160,P13639,O14958
5	GO:0014070	response to organic cyclic compound	Biological Process	10	P13639,O15143,P09874,P61160,P11021,Q9NR30,Q96SB3,O14958,Q08211,P38919
5	GO:0033993	response to lipid	Biological Process	11	P13639,O15143,P16615,Q5U071,P31151,P30048,Q13151,P09874,Q96SB3,Q6P2Q9,P13010
5	GO:0034097	response to cytokine	Biological Process	14	P63104,O43707,P22626,P17987,Q08211,P04406,P61160,O75369,P38159,P11021,P23396,Q6P2Q9,P05141,P13010
5	GO:0070848	response to growth factor	Biological Process	9	P09874,P24928,P11021,P50402,P68104,Q96SB3,P62330,P38919,P13639
5	GO:0097305	response to alcohol	Biological Process	5	Q96SB3,P49411,P13639,P61160,P09874
5	GO:1901654	response to ketone	Biological Process	2	Q96SB3,P09874
5	GO:0010038	response to metal ion	Biological Process	4	O14958,P11021,P09874,P63316
5	GO:0071731	response to nitric oxide	Biological Process	1	P24941
5	GO:0072714	response to selenite ion	Biological Process	1	P38919
5	GO:0035983	response to trichostatin A	Biological Process	1	P61160
5	GO:0043331	response to dsRNA	Biological Process	2	Q9NR30,Q08211
5	GO:0060359	response to ammonium ion	Biological Process	2	P11021,Q96SB3
5	GO:0032496	response to lipopolysaccharide	Biological Process	6	Q6P2Q9,P16615,Q5U071,P31151,P30048,Q13151
5	GO:0051591	response to cAMP	Biological Process	1	P11021
5	GO:1901652	response to peptide	Biological Process	7	O14654,P09874,P61026,P14618,Q13243,P78527,Q96SB3
5	GO:1904313	response to methamphetamine hydrochloride	Biological Process	1	P11021
5	GO:0014887	cardiac muscle adaptation	Biological Process	1	P16615
5	GO:0043501	skeletal muscle adaptation	Biological Process	2	P16615,P63316
5	GO:0000054	ribosomal subunit export from nucleus	Biological Process	2	Q15050,Q96GA3
5	GO:0071427	mRNA-containing ribonucleoprotein complex export from nucleus	Biological Process	7	P22626,Q86V81,P38919,P61326,Q13243,Q9Y5S9,Q92621
5	GO:0071428	rRNA-containing ribonucleoprotein complex export from nucleus	Biological Process	2	Q15050,Q96GA3
5	GO:0071431	tRNA-containing ribonucleoprotein complex export from nucleus	Biological Process	1	Q92621
5	GO:0034613	cellular protein localization	Biological Process	56	Q15050,Q96GA3,A8K7D9,P22626,Q86V81,P38919,P61326,Q13243,Q9Y5S9,Q92621,P63104,P05387,P32969,P08708,P23396,P62750,P63173,P30050,P60866,P42677,P62269,P62280,P18124,P36578,Q02878,Q9Y3U8,P62424,P42766,P62851,P83881,P26373,P62753,P49207,P25398,Q9H444,P12236,P61026,P18085,P62330,P09496,Q00610,O75369,Q8TAA5,P11021,Q16643,Q9NW64,P10599,P50402,P13010,O75367,Q9P0M6,P09874,Q96SB3,Q08211,P17987,Q9UMS4
5	GO:0045176	apical protein localization	Biological Process	1	P18085
5	GO:1902414	protein localization to cell junction	Biological Process	1	O43707
5	GO:0048254	snoRNA localization	Biological Process	1	Q9Y2X3
5	GO:0090672	telomerase RNA localization	Biological Process	1	P17987
5	GO:0090685	RNA localization to nucleus	Biological Process	1	P17987
5	GO:0016192	vesicle-mediated transport	Biological Process	26	O43707,P12814,P35580,P18085,P61026,Q00610,P35579,Q9H444,P62330,I3L2G1,O15144,P61160,O15143,Q5HYM2,P68104,P68371,P12956,P14618,P31151,P13639,Q86YZ3,P13010,Q562R1,P09496,P16615,B4DXN3
5	GO:0046903	secretion	Biological Process	20	O43707,P12814,P35580,P61026,P05141,P12236,Q08211,P68104,P68371,P12956,P14618,P31151,P13639,P61160,Q86YZ3,P13010,P35579,P62330,P04406,P16615
5	GO:0006811	ion transport	Biological Process	11	O14958,P24941,E9PMI6,E9PCX7,Q0QEN7,P25705,H7C086,B4DL14,O43707,Q00610,P16615
5	GO:0006836	neurotransmitter transport	Biological Process	1	P16615
5	GO:0006839	mitochondrial transport	Biological Process	5	P12236,Q8TAA5,P25705,P63104,P05141
5	GO:0007034	vacuolar transport	Biological Process	3	Q9H444,B4DXN3,B2RA72
5	GO:0009914	hormone transport	Biological Process	2	P05141,P12236
5	GO:0051180	vitamin transport	Biological Process	1	P02774
5	GO:0036465	synaptic vesicle recycling	Biological Process	2	Q562R1,P62330
5	GO:0055085	transmembrane transport	Biological Process	10	O14958,E9PCX7,Q0QEN7,P25705,H7C086,B4DL14,Q8TAA5,P11021,O43707,P16615
5	GO:0071702	organic substance transport	Biological Process	58	Q15050,Q96GA3,A8K7D9,Q86V81,P38919,P61326,Q13243,Q9Y5S9,P22626,Q92621,P63104,P05387,P32969,P08708,P23396,P62750,P63173,P30050,P60866,P42677,P62269,P62280,P18124,P36578,Q02878,Q9Y3U8,P62424,P42766,P62851,P83881,P26373,P62753,P49207,P25398,Q9H444,P12236,P61026,P18085,P62330,P09496,Q00610,P05141,P35579,O43707,F5H018,Q5HYM2,Q8TAA5,P11021,Q08211,Q9NW64,P17987,P10599,P50402,P35580,P04406,Q9NZI8,Q9Y6M1,…
5	GO:0071705	nitrogen compound transport	Biological Process	58	Q15050,Q96GA3,A8K7D9,Q86V81,P38919,P61326,Q13243,Q9Y5S9,P22626,Q92621,P63104,P05387,P32969,P08708,P23396,P62750,P63173,P30050,P60866,P42677,P62269,P62280,P18124,P36578,Q02878,Q9Y3U8,P62424,P42766,P62851,P83881,P26373,P62753,P49207,P25398,Q9H444,P12236,P61026,P18085,P62330,P09496,Q00610,P05141,P35579,O43707,F5H018,Q5HYM2,Q8TAA5,P11021,Q08211,Q9NW64,P17987,P10599,P50402,P35580,P04406,Q9NZI8,Q9Y6M1,…
5	GO:0098657	import into cell	Biological Process	9	Q00610,P35579,O15144,P61160,O15143,P62330,Q562R1,O43707,P09496
5	GO:0099504	synaptic vesicle cycle	Biological Process	3	Q562R1,P62330,P16615
5	GO:1901998	toxin transport	Biological Process	2	P17987,P11021
5	GO:0015031	protein transport	Biological Process	55	Q15050,Q96GA3,A8K7D9,P22626,Q86V81,P38919,P61326,Q13243,Q9Y5S9,Q92621,P63104,P05387,P32969,P08708,P23396,P62750,P63173,P30050,P60866,P42677,P62269,P62280,P18124,P36578,Q02878,Q9Y3U8,P62424,P42766,P62851,P83881,P26373,P62753,P49207,P25398,Q9H444,P12236,P61026,P18085,P62330,P09496,Q00610,P05141,Q8TAA5,P11021,Q08211,Q9NW64,P17987,P10599,P50402,P35580,P04406,P35579,O43707,F5H018,Q5HYM2
5	GO:0072594	establishment of protein localization to organelle	Biological Process	34	A8K7D9,P05387,P32969,P08708,P23396,P62750,P63173,P30050,P60866,P42677,P62269,P62280,P18124,P36578,Q02878,Q9Y3U8,P62424,P42766,P62851,P83881,P26373,P62753,P49207,P25398,Q9H444,P12236,Q8TAA5,P11021,Q9NW64,O75367,Q9P0M6,P61026,P63104,P17987
5	GO:0090150	establishment of protein localization to membrane	Biological Process	27	P05387,P32969,P08708,P23396,P62750,P63173,P30050,P60866,P42677,P62269,P62280,P18124,P36578,Q02878,Q9Y3U8,P62424,P42766,P62851,P83881,P26373,P62753,P49207,P25398,Q9H444,P11021,P61026,P63104
5	GO:0050658	RNA transport	Biological Process	13	Q15050,Q96GA3,Q86V81,P38919,P61326,Q13243,Q9Y5S9,P22626,Q92621,Q08211,Q9NZI8,Q9Y6M1,O00425
5	GO:0007269	neurotransmitter secretion	Biological Process	1	P16615
5	GO:0051204	protein insertion into mitochondrial membrane	Biological Process	1	P63104
5	GO:0051303	establishment of chromosome localization	Biological Process	3	Q15050,Q9H444,P61160
5	GO:0051650	establishment of vesicle localization	Biological Process	3	O43707,A0A2U3TZL8,P16615
5	GO:0051683	establishment of Golgi localization	Biological Process	1	P63104
5	GO:0060402	calcium ion transport into cytosol	Biological Process	1	O14958
5	GO:0140238	presynaptic endocytosis	Biological Process	2	Q562R1,P62330
5	GO:0007097	nuclear migration	Biological Process	1	P35580
5	GO:0072384	organelle transport along microtubule	Biological Process	1	A0A2U3TZL8
5	GO:0051220	cytoplasmic sequestering of protein	Biological Process	1	Q16643
5	GO:0006886	intracellular protein transport	Biological Process	46	Q15050,Q96GA3,A8K7D9,P22626,Q86V81,P38919,P61326,Q13243,Q9Y5S9,Q92621,P63104,P05387,P32969,P08708,P23396,P62750,P63173,P30050,P60866,P42677,P62269,P62280,P18124,P36578,Q02878,Q9Y3U8,P62424,P42766,P62851,P83881,P26373,P62753,P49207,P25398,Q9H444,P12236,Q8TAA5,P11021,Q9NW64,P10599,P50402,P61026,P18085,P62330,P09496,Q00610
5	GO:0006888	ER to Golgi vesicle-mediated transport	Biological Process	1	P18085
5	GO:0016197	endosomal transport	Biological Process	5	P62330,Q5HYM2,Q00610,P61026,Q9H444
5	GO:0016482	cytosolic transport	Biological Process	3	Q5HYM2,Q00610,P61160
5	GO:0030705	cytoskeleton-dependent intracellular transport	Biological Process	2	O43707,A0A2U3TZL8
5	GO:0042776	mitochondrial ATP synthesis coupled proton transport	Biological Process	1	P25705
5	GO:0048489	synaptic vesicle transport	Biological Process	1	P16615
5	GO:0051169	nuclear transport	Biological Process	20	Q15050,Q96GA3,A8K7D9,Q86V81,P38919,P61326,Q13243,Q9Y5S9,P22626,Q92621,F5H018,Q9NW64,P10599,P50402,Q08211,P62318,P62314,P62306,O75531,P17096
5	GO:1990036	calcium ion import into sarcoplasmic reticulum	Biological Process	1	P16615
5	GO:0032418	lysosome localization	Biological Process	1	P35579
5	GO:0050000	chromosome localization	Biological Process	3	Q15050,Q9H444,P61160
5	GO:0051645	Golgi localization	Biological Process	1	P63104
5	GO:0051647	nucleus localization	Biological Process	1	P35580
5	GO:0051648	vesicle localization	Biological Process	3	O43707,A0A2U3TZL8,P16615
5	GO:0046794	transport of virus	Biological Process	1	Q92621
5	GO:0051836	translocation of molecules into other organism involved in symbiotic interaction	Biological Process	2	P17987,Q86V81
5	GO:0061844	antimicrobial humoral immune response mediated by antimicrobial peptide	Biological Process	2	P04406,P31151
5	GO:0042742	defense response to bacterium	Biological Process	2	Q5U071,P31151
5	GO:0050832	defense response to fungus	Biological Process	1	P04406
5	GO:0051852	disruption by host of symbiont cells	Biological Process	1	P04406
5	GO:0016032	viral process	Biological Process	39	Q9H444,P05387,P32969,P08708,P23396,P62750,P63173,P30050,P60866,P42677,P62269,P62280,P18124,P36578,Q02878,Q9Y3U8,P62424,P42766,P62851,P83881,P26373,P62753,P49207,P25398,Q92621,Q15365,Q08211,O75531,Q12906,P11388,P24928,P12956,P17096,P13010,P05141,P16104,P12236,Q86V81,P45973
5	GO:0051817	modification of morphology or physiology of other organism involved in symbiotic interaction	Biological Process	1	P04406
5	GO:0044364	disruption of cells of other organism	Biological Process	1	P04406
5	GO:0044531	modulation of programmed cell death in other organism	Biological Process	1	P04406
5	GO:0044003	modification by symbiont of host morphology or physiology	Biological Process	1	P04406
5	GO:0044417	translocation of molecules into host	Biological Process	2	P17987,Q86V81
5	GO:0051851	modification by host of symbiont morphology or physiology	Biological Process	1	P04406
5	GO:0010460	positive regulation of heart rate	Biological Process	1	P16615
5	GO:0050821	protein stabilization	Biological Process	3	P04406,Q15185,P17987
5	GO:0031648	protein destabilization	Biological Process	1	P78527
5	GO:0032205	negative regulation of telomere maintenance	Biological Process	3	Q9H0A0,P09874,P13010
5	GO:0032206	positive regulation of telomere maintenance	Biological Process	3	P17987,P13010,P22626
5	GO:1904356	regulation of telomere maintenance via telomere lengthening	Biological Process	5	Q9H0A0,P17987,P13010,P09874,P22626
5	GO:0001508	action potential	Biological Process	2	Q7Z406,P16615
5	GO:0051881	regulation of mitochondrial membrane potential	Biological Process	2	P09874,P30048
5	GO:0051899	membrane depolarization	Biological Process	1	P09874
5	GO:0060078	regulation of postsynaptic membrane potential	Biological Process	1	P38919
5	GO:0060306	regulation of membrane repolarization	Biological Process	1	O14958
5	GO:0086009	membrane repolarization	Biological Process	1	O14958
5	GO:0086036	regulation of cardiac muscle cell membrane potential	Biological Process	1	P16615
5	GO:0048872	homeostasis of number of cells	Biological Process	3	P62753,P08708,Q5HYL6
5	GO:0048878	chemical homeostasis	Biological Process	6	O14958,P16615,P12277,P62753,P09874,Q86YZ3
5	GO:0060249	anatomical structure homeostasis	Biological Process	12	P09874,P12956,Q15185,P13010,P78527,E7ESD9,Q9NY12,P35251,Q9H0A0,P17987,Q9H444,P22626
5	GO:0043488	regulation of mRNA stability	Biological Process	7	Q9NZI8,Q15717,Q08211,Q13151,P63104,Q9Y6M1,O00425
5	GO:0043489	RNA stabilization	Biological Process	4	Q15717,Q08211,Q9NZI8,Q13151
5	GO:0031915	positive regulation of synaptic plasticity	Biological Process	1	Q16643
5	GO:0048168	regulation of neuronal synaptic plasticity	Biological Process	1	Q16643
5	GO:0007599	hemostasis	Biological Process	6	P45973,A0A0F7G8J1,P63104,P35579,P19105,A0A3S8NFS6
5	GO:0046902	regulation of mitochondrial membrane permeability	Biological Process	2	P63104,P05141
5	GO:1905710	positive regulation of membrane permeability	Biological Process	2	P63104,P05141
5	GO:0022898	regulation of transmembrane transporter activity	Biological Process	2	O43707,O14958
5	GO:0043086	negative regulation of catalytic activity	Biological Process	3	P04406,P30048,O75367
5	GO:0051100	negative regulation of binding	Biological Process	2	P11021,P38919
5	GO:0043085	positive regulation of catalytic activity	Biological Process	13	P18085,P23396,P10599,P08590,A0A024RBS1,P12956,P13010,Q04837,Q15185,P17987,H0YJH9,P22626,Q08211
5	GO:0051099	positive regulation of binding	Biological Process	4	P10599,P62330,Q08211,P09874
5	GO:0010911	regulation of isomerase activity	Biological Process	1	Q08211
5	GO:0051336	regulation of hydrolase activity	Biological Process	7	P04406,P18085,P23396,P08590,P63316,Q04837,Q08211
5	GO:0051338	regulation of transferase activity	Biological Process	12	P10599,P30048,A0A024RBS1,P23396,P12956,P13010,Q15185,P17987,O75367,P68104,H0YJH9,P22626
5	GO:0043393	regulation of protein binding	Biological Process	2	P62330,P11021
5	GO:0051101	regulation of DNA binding	Biological Process	2	P10599,P09874
5	GO:1905214	regulation of RNA binding	Biological Process	1	P38919
5	GO:1905696	regulation of polysome binding	Biological Process	1	Q08211
5	GO:0042254	ribosome biogenesis	Biological Process	49	P62750,P30050,Q02878,A8K800,Q15050,P46087,P42677,A0A0B4J2E5,Q96GA3,Q9H0A0,Q8IY81,Q9NY12,Q9Y4W2,Q9NV06,Q14692,P18124,P42766,Q6DKI1,B4DEN9,Q9GZL7,B5MCF9,P55769,P62424,P08708,Q9NV31,Q9Y2X3,Q9NR30,P38919,M0R0P1,P62753,J3KNP2,Q9UNX4,Q8TED0,Q15061,Q9Y3A2,O43818,U3KQ48,A0A0A0MTB8,Q9H9Y2,Q9H8H0,Q14690,I3L2C7,P63173,Q9NWU5,J3QQQ9,Q9NWT1,A8K4Z4,B4DHZ2,B2R5U7
5	GO:0022618	ribonucleoprotein complex assembly	Biological Process	24	P62750,P30050,Q02878,A8K800,Q15050,P46087,P42677,A0A0B4J2E5,Q9UMS4,Q6P2Q9,O94906,P62314,O75533,P62318,P62306,E9PMI6,I3L2C7,P55769,P38159,Q13243,Q08211,P63173,Q9NWU5,Q15185
5	GO:0042273	ribosomal large subunit biogenesis	Biological Process	19	P62750,P30050,Q02878,A8K800,Q15050,P46087,P18124,P42766,Q6DKI1,B4DEN9,Q9GZL7,Q8IY81,B5MCF9,P55769,P62424,Q9Y4W2,P63173,J3QQQ9,Q9NWT1
5	GO:0042274	ribosomal small subunit biogenesis	Biological Process	11	P42677,A0A0B4J2E5,Q15050,Q9NV06,Q14692,Q9H8H0,P63173,Q9H0A0,P08708,P62753,Q96GA3
6	GO:0007283	spermatogenesis	Biological Process	2	Q08J23,P16104
6	GO:0009060	aerobic respiration	Biological Process	4	P11177,Q13584,Q0QF37,Q0QF12
6	GO:0006635	fatty acid beta-oxidation	Biological Process	3	P13804,P38117,B4DRH6
6	GO:0006528	asparagine metabolic process	Biological Process	1	B4DY32
6	GO:0043604	amide biosynthetic process	Biological Process	105	P32969,P63173,J3QQQ9,Q02878,Q9Y3U8,P83881,P11177,A0A248RGE3,P68104,P05387,K7EJT5,S4R456,Q5JR95,C9JYQ9,Q9BTQ7,Q8NI62,Q76N57,P08708,P23396,P62750,Q96IR1,F8W7C6,I3L3P7,D6RG13,A0A2R8Y811,A0A2R8Y849,G3V203,P30050,A0A087WXM6,A0PJ62,B3KS36,P60866,E9PQD7,P42677,P62269,J3KMX5,H0YLP6,P62280,P18124,P36578,M0R3D6,M0R210,Q0VGL3,Q1JQ76,A0A2R8Y623,O15235,P62424,D3YTB1,E7EX53,D6RD47,F8WBS5,M0R0F0,C9J9K3,P42766,P…
6	GO:0072522	purine-containing compound biosynthetic process	Biological Process	14	P11177,P04406,P14618,B4DHM5,Q92621,H0Y4R1,A0A384N647,P25705,Q15374,Q0QEN7,H7C086,B4DL14,P06733,P09874
6	GO:0072525	pyridine-containing compound biosynthetic process	Biological Process	5	P04406,P14618,B4DHM5,Q92621,P06733
6	GO:0072528	pyrimidine-containing compound biosynthetic process	Biological Process	2	Q53SY7,B4E1E0
6	GO:0006144	purine nucleobase metabolic process	Biological Process	1	Q15374
6	GO:0006163	purine nucleotide metabolic process	Biological Process	15	P11177,P04406,P14618,B4DHM5,Q92621,H0Y4R1,A0A384N647,P25705,Q0QEN7,H7C086,B4DL14,P11055,Q9Y623,P06733,P09874
6	GO:0042278	purine nucleoside metabolic process	Biological Process	1	A0A384N647
6	GO:0034032	purine nucleoside bisphosphate metabolic process	Biological Process	1	P11177
6	GO:0019362	pyridine nucleotide metabolic process	Biological Process	6	P04406,P14618,B4DHM5,Q92621,P06733,P11177
6	GO:0006206	pyrimidine nucleobase metabolic process	Biological Process	1	Q53SY7
6	GO:0006213	pyrimidine nucleoside metabolic process	Biological Process	1	B4E1E0
6	GO:0006220	pyrimidine nucleotide metabolic process	Biological Process	1	B4E1E0
6	GO:0006417	regulation of translation	Biological Process	21	P38919,Q15717,P13639,P98179,Q9H0A0,P04406,P23396,Q9NZI8,Q12906,Q9Y6M1,O00425,I3L397,Q7L0Y3,Q08211,P63173,P61326,Q9Y5S9,A0A0F7L0Q8,Q59GC1,Q9BSH4,A0A024RBS1
6	GO:1904714	regulation of chaperone-mediated autophagy	Biological Process	1	P68104
6	GO:0030162	regulation of proteolysis	Biological Process	5	A0A3G2LMJ8,P06733,P04406,P35579,P23396
6	GO:1903317	regulation of protein maturation	Biological Process	3	A0A3G2LMJ8,P06733,P35579
6	GO:0017148	negative regulation of translation	Biological Process	7	P38919,P04406,P23396,Q9NZI8,Q12906,Q9Y6M1,O00425
6	GO:1903318	negative regulation of protein maturation	Biological Process	1	A0A3G2LMJ8
6	GO:0045727	positive regulation of translation	Biological Process	8	I3L397,Q7L0Y3,Q08211,P13639,P38919,Q15717,P98179,Q9H0A0
6	GO:1903319	positive regulation of protein maturation	Biological Process	2	P06733,P35579
6	GO:0006023	aminoglycan biosynthetic process	Biological Process	1	Q00610
6	GO:0030203	glycosaminoglycan metabolic process	Biological Process	1	Q00610
6	GO:0043043	peptide biosynthetic process	Biological Process	103	P32969,P63173,J3QQQ9,Q02878,Q9Y3U8,P83881,A0A248RGE3,P68104,P05387,K7EJT5,S4R456,Q5JR95,C9JYQ9,Q9BTQ7,Q8NI62,Q76N57,P08708,P23396,P62750,Q96IR1,F8W7C6,I3L3P7,D6RG13,A0A2R8Y811,A0A2R8Y849,G3V203,P30050,A0A087WXM6,A0PJ62,B3KS36,P60866,E9PQD7,P42677,P62269,J3KMX5,H0YLP6,P62280,P18124,P36578,M0R3D6,M0R210,Q0VGL3,Q1JQ76,A0A2R8Y623,O15235,P62424,D3YTB1,E7EX53,D6RD47,F8WBS5,M0R0F0,C9J9K3,P42766,P62851,B…
6	GO:0046112	nucleobase biosynthetic process	Biological Process	2	Q53SY7,Q15374
6	GO:0009119	ribonucleoside metabolic process	Biological Process	2	B4E1E0,A0A384N647
6	GO:0009163	nucleoside biosynthetic process	Biological Process	1	B4E1E0
6	GO:0009101	glycoprotein biosynthetic process	Biological Process	1	Q96HX3
6	GO:0042398	cellular modified amino acid biosynthetic process	Biological Process	3	B4DNF8,B3KVA7,P12277
6	GO:0030811	regulation of nucleotide catabolic process	Biological Process	1	Q92621
6	GO:0061013	regulation of mRNA catabolic process	Biological Process	7	Q9NZI8,Q15717,P63104,Q9Y6M1,O00425,Q08211,Q13151
6	GO:0006110	regulation of glycolytic process	Biological Process	1	Q92621
6	GO:1902369	negative regulation of RNA catabolic process	Biological Process	4	Q15717,Q08211,Q9NZI8,Q13151
6	GO:0046395	carboxylic acid catabolic process	Biological Process	3	B4DRH6,P13804,P38117
6	GO:0042744	hydrogen peroxide catabolic process	Biological Process	1	P30048
6	GO:0032802	low-density lipoprotein particle receptor catabolic process	Biological Process	2	P09496,Q00610
6	GO:0009062	fatty acid catabolic process	Biological Process	3	B4DRH6,P13804,P38117
6	GO:0006401	RNA catabolic process	Biological Process	33	P05387,P32969,P08708,P23396,P62750,P63173,P30050,P60866,P42677,P62269,P62280,P18124,P36578,Q02878,Q9Y3U8,P38919,P61326,P62424,P42766,P62851,P83881,P26373,P62753,P49207,P25398,Q9Y5S9,Q9NZI8,Q15717,P63104,Q9Y6M1,O00425,Q08211,Q13151
6	GO:0043632	modification-dependent macromolecule catabolic process	Biological Process	4	H0YLS6,E5RJR5,P11021,P24941
6	GO:0044257	cellular protein catabolic process	Biological Process	8	H0YLS6,E5RJR5,Q9UMS4,P11021,P24941,P09496,Q00610,Q9H444
6	GO:0019320	hexose catabolic process	Biological Process	3	P04406,P06733,P14618
6	GO:0006096	glycolytic process	Biological Process	5	Q92621,P04406,P06733,P14618,B4DHM5
6	GO:1901292	nucleoside phosphate catabolic process	Biological Process	5	P04406,P14618,B4DHM5,Q92621,P06733
6	GO:0032885	regulation of polysaccharide biosynthetic process	Biological Process	1	Q00610
6	GO:2000112	regulation of cellular macromolecule biosynthetic process	Biological Process	63	P22626,P09874,O75367,P06733,P16403,Q9P0M6,P10599,P45973,P24941,P35251,B4DUA2,Q02878,Q6E433,P17096,Q92522,A0A075B7D9,Q8TDG2,I3L1L3,P24928,Q08211,Q5T6W2,O00422,P46087,P63173,P61326,Q9Y5S9,P98179,A0A0F7L0Q8,Q59GC1,Q9BSH4,A0A024RBS1,Q86V81,Q9Y5B9,P38919,Q15717,P13639,Q9H0A0,S4R2Y4,P12956,Q12906,P13010,P04406,P23396,Q9NZI8,Q9Y6M1,O00425,P17987,Q15061,I3L397,Q8TED0,P38159,P18085,Q15365,P61160,P11388,P7…
6	GO:2001141	regulation of RNA biosynthetic process	Biological Process	42	P22626,P09874,O75367,P06733,P16403,Q9P0M6,P10599,P45973,P24941,P35251,Q02878,Q6E433,P17096,Q92522,A0A075B7D9,Q8TDG2,I3L1L3,P24928,Q08211,Q5T6W2,O00422,P46087,Q86V81,Q9Y5B9,S4R2Y4,P12956,Q12906,P13010,Q15061,Q8TED0,P38159,P18085,Q15365,P61160,P11388,P78527,O94906,P23396,P30048,Q9H8H0,O43707,P11021
6	GO:0030808	regulation of nucleotide biosynthetic process	Biological Process	3	Q92621,P09874,P06733
6	GO:1902679	negative regulation of RNA biosynthetic process	Biological Process	17	P22626,P09874,O75367,P06733,P16403,Q9P0M6,P10599,P45973,P24941,P35251,S4R2Y4,P12956,Q12906,P17096,P13010,Q8TDG2,Q92522
6	GO:2000113	negative regulation of cellular macromolecule biosynthetic process	Biological Process	25	P22626,P09874,O75367,P06733,P16403,Q9P0M6,P10599,P45973,P24941,P35251,S4R2Y4,P12956,Q12906,P17096,P13010,Q8TDG2,P04406,P23396,Q9NZI8,P38919,Q9Y6M1,O00425,Q92522,Q9H0A0,P49916
6	GO:0030809	negative regulation of nucleotide biosynthetic process	Biological Process	1	P09874
6	GO:0045740	positive regulation of DNA replication	Biological Process	2	P24941,Q08211
6	GO:1902680	positive regulation of RNA biosynthetic process	Biological Process	22	Q86V81,Q9Y5B9,P16403,P17096,Q92522,P12956,Q12906,P24941,P35251,Q8TED0,Q15061,P09874,Q08211,P38159,P18085,Q15365,P61160,P11388,P78527,O94906,Q9H8H0,P11021
6	GO:2000573	positive regulation of DNA biosynthetic process	Biological Process	4	P17987,P13010,Q15185,P22626
6	GO:0030810	positive regulation of nucleotide biosynthetic process	Biological Process	1	P06733
6	GO:0006545	glycine biosynthetic process	Biological Process	1	H0YIZ0
6	GO:0046394	carboxylic acid biosynthetic process	Biological Process	11	Q15185,P04406,P14618,B4DHM5,Q92621,B4DY32,P54886,B3KMB7,H0YIZ0,P06733,Q00610
6	GO:0006561	proline biosynthetic process	Biological Process	2	P54886,B3KMB7
6	GO:0006260	DNA replication	Biological Process	16	P35251,Q04837,P17096,A4FS09,B4DDF5,B1AHA9,Q8NHX6,P49916,B4DUA2,Q86V81,P24941,Q08211,Q9Y5B9,A0A087X270,Q08945,H7C5P4
6	GO:0006351	transcription, DNA-templated	Biological Process	47	P22626,P09874,O75367,P06733,P16403,Q9P0M6,P10599,P45973,P24941,P35251,Q9NR30,P38159,Q9Y5B9,Q08945,P24928,Q08211,P62318,P62306,Q02878,Q6E433,P17096,Q92522,A0A075B7D9,Q8TDG2,I3L1L3,Q5T6W2,O00422,P46087,Q86V81,Q9BYG3,S4R2Y4,P12956,Q12906,P13010,Q15061,Q8TED0,P18085,Q15365,P61160,P11388,P78527,O94906,P23396,P30048,Q9H8H0,P11021,C9JLU1
6	GO:0006412	translation	Biological Process	103	P32969,P63173,J3QQQ9,Q02878,Q9Y3U8,P83881,P05387,P08708,P23396,P62750,P30050,P60866,P42677,P62269,P62280,P18124,P36578,P62424,P42766,P62851,P26373,P62753,P49207,P25398,P49411,P68104,Q6FG99,P13639,P26641,P61326,Q9Y5S9,P98179,A0A0F7L0Q8,Q59GC1,Q9BSH4,A0A024RBS1,H0YIC2,Q9H9J7,Q5JTZ9,C9J7S3,A8K5W7,Q9NVC0,U3KQ50,H0YHS6,I3L397,P38919,Q15717,Q9H0A0,P04406,Q9NZI8,Q12906,Q9Y6M1,O00425,O15235,P82921,H0YG82…
6	GO:0006414	translational elongation	Biological Process	13	I3L397,P49411,O15235,P82921,Q9NWU5,Q96EL2,Q96A35,P38919,P68104,P05387,Q6FG99,P13639,P26641
6	GO:0071897	DNA biosynthetic process	Biological Process	8	Q15185,Q9NY12,P35251,Q9H0A0,P17987,P13010,P22626,P49916
6	GO:1901663	quinone biosynthetic process	Biological Process	1	B4DU83
6	GO:0009108	coenzyme biosynthetic process	Biological Process	8	P11177,P04406,P14618,B4DHM5,Q92621,B4DFQ8,B4DU83,P06733
6	GO:0019319	hexose biosynthetic process	Biological Process	2	P04406,P06733
6	GO:0006633	fatty acid biosynthetic process	Biological Process	1	Q15185
6	GO:0000271	polysaccharide biosynthetic process	Biological Process	1	Q00610
6	GO:0032774	RNA biosynthetic process	Biological Process	48	P22626,P09874,O75367,P06733,P16403,Q9P0M6,P10599,P45973,P24941,P35251,Q9NR30,P38159,Q9Y5B9,Q08945,P24928,Q08211,P62318,P62306,C9JLU1,Q02878,Q6E433,P17096,Q92522,A0A075B7D9,Q8TDG2,I3L1L3,Q5T6W2,O00422,P46087,Q86V81,Q9BYG3,S4R2Y4,P12956,Q12906,P13010,Q15061,Q8TED0,P18085,Q15365,P61160,P11388,P78527,O94906,P23396,P30048,Q9H8H0,O43707,P11021
6	GO:0071616	acyl-CoA biosynthetic process	Biological Process	1	P11177
6	GO:0042396	phosphagen biosynthetic process	Biological Process	3	B4DNF8,B3KVA7,P12277
6	GO:0046390	ribose phosphate biosynthetic process	Biological Process	13	P11177,P04406,P14618,B4DHM5,Q92621,A0A384N647,P25705,Q0QEN7,H7C086,B4DL14,B4E1E0,P06733,P09874
6	GO:1901293	nucleoside phosphate biosynthetic process	Biological Process	14	P11177,P04406,P14618,B4DHM5,Q92621,H0Y4R1,A0A384N647,P25705,Q0QEN7,H7C086,B4DL14,B4E1E0,P06733,P09874
6	GO:1901659	glycosyl compound biosynthetic process	Biological Process	1	B4E1E0
6	GO:0046456	icosanoid biosynthetic process	Biological Process	1	Q15185
6	GO:0006402	mRNA catabolic process	Biological Process	33	P05387,P32969,P08708,P23396,P62750,P63173,P30050,P60866,P42677,P62269,P62280,P18124,P36578,Q02878,Q9Y3U8,P38919,P61326,P62424,P42766,P62851,P83881,P26373,P62753,P49207,P25398,Q9Y5S9,Q9NZI8,Q15717,P63104,Q9Y6M1,O00425,Q08211,Q13151
6	GO:0045892	negative regulation of transcription, DNA-templated	Biological Process	17	P22626,P09874,O75367,P06733,P16403,Q9P0M6,P10599,P45973,P24941,P35251,P17096,Q92522,S4R2Y4,P12956,Q12906,P13010,Q8TDG2
6	GO:0033119	negative regulation of RNA splicing	Biological Process	3	P22626,P38159,O00422
6	GO:0045814	negative regulation of gene expression, epigenetic	Biological Process	5	P16403,P17096,Q92522,O75367,Q9P0M6
6	GO:0050686	negative regulation of mRNA processing	Biological Process	3	P22626,P38159,O00422
6	GO:0008156	negative regulation of DNA replication	Biological Process	1	P49916
6	GO:0045910	negative regulation of DNA recombination	Biological Process	2	P16403,Q92522
6	GO:1901859	negative regulation of mitochondrial DNA metabolic process	Biological Process	1	P49916
6	GO:2000279	negative regulation of DNA biosynthetic process	Biological Process	1	Q9H0A0
6	GO:1903312	negative regulation of mRNA metabolic process	Biological Process	7	P22626,P38159,O00422,Q15717,Q08211,Q9NZI8,Q13151
6	GO:0045936	negative regulation of phosphate metabolic process	Biological Process	4	P78527,O75367,P30048,P09874
6	GO:0031400	negative regulation of protein modification process	Biological Process	3	P78527,P23396,O75367
6	GO:0045861	negative regulation of proteolysis	Biological Process	2	A0A3G2LMJ8,P04406
6	GO:1900543	negative regulation of purine nucleotide metabolic process	Biological Process	1	P09874
6	GO:0033120	positive regulation of RNA splicing	Biological Process	7	P38159,Q9UMS4,Q13595,P98179,Q13243,Q9NW64,P24928
6	GO:0045815	positive regulation of gene expression, epigenetic	Biological Process	6	P16403,P17096,Q92522,O75367,Q9NR30,O75533
6	GO:0045893	positive regulation of transcription, DNA-templated	Biological Process	22	Q86V81,Q9Y5B9,P16403,P17096,Q92522,Q8TED0,Q15061,P09874,Q08211,P12956,P38159,P18085,Q15365,P61160,P11388,P78527,O94906,Q9H8H0,P11021,Q12906,P24941,P35251
6	GO:0050685	positive regulation of mRNA processing	Biological Process	4	P38159,Q9UMS4,Q13595,P98179
6	GO:1902373	negative regulation of mRNA catabolic process	Biological Process	4	Q15717,Q08211,Q9NZI8,Q13151
6	GO:0032077	positive regulation of deoxyribonuclease activity	Biological Process	1	P23396
6	GO:0045911	positive regulation of DNA recombination	Biological Process	2	P09874,P61160
6	GO:1903313	positive regulation of mRNA metabolic process	Biological Process	4	P38159,Q9UMS4,Q13595,P98179
6	GO:0045937	positive regulation of phosphate metabolic process	Biological Process	8	P10599,A0A024RBS1,Q15185,P23396,P12956,P13010,P31151,P06733
6	GO:0031401	positive regulation of protein modification process	Biological Process	6	P11021,P10599,P23396,P12956,P13010,P31151
6	GO:0045862	positive regulation of proteolysis	Biological Process	3	P06733,P35579,P23396
6	GO:1900544	positive regulation of purine nucleotide metabolic process	Biological Process	1	P06733
6	GO:0031399	regulation of protein modification process	Biological Process	10	Q96SB3,P78527,Q15397,P23396,P11021,P10599,O75367,P12956,P13010,P31151
6	GO:0019220	regulation of phosphate metabolic process	Biological Process	15	Q96SB3,P78527,Q92621,P10599,O75367,P30048,A0A024RBS1,Q15185,P23396,P12956,P13010,P31151,P68104,P09874,P06733
6	GO:0051196	regulation of coenzyme metabolic process	Biological Process	1	Q92621
6	GO:0006355	regulation of transcription, DNA-templated	Biological Process	41	P22626,P09874,O75367,P06733,P16403,Q9P0M6,P10599,P45973,P24941,P35251,Q08211,Q5T6W2,O00422,P46087,Q86V81,Q9Y5B9,S4R2Y4,P12956,Q12906,P17096,P13010,Q8TDG2,Q92522,Q15061,Q8TED0,P38159,P18085,Q15365,P61160,P11388,P78527,O94906,P23396,P30048,Q9H8H0,P11021,Q02878,Q6E433,A0A075B7D9,I3L1L3,P24928
6	GO:0010608	posttranscriptional regulation of gene expression	Biological Process	26	P63173,P61326,Q9Y5S9,P98179,A0A0F7L0Q8,Q59GC1,Q9BSH4,A0A024RBS1,Q9NZI8,P38919,Q15717,P13639,Q9H0A0,P04406,P23396,Q12906,Q9Y6M1,O00425,Q08211,P22626,P63104,I3L397,P24928,Q92621,Q7L0Y3,Q13151
6	GO:0040029	regulation of gene expression, epigenetic	Biological Process	12	O75367,Q9P0M6,Q08211,P22626,P16403,P17096,Q92522,Q9NR30,O75533,P24928,Q92621,Q15717
6	GO:0043484	regulation of RNA splicing	Biological Process	14	P38159,P61326,O00422,J3QL05,Q13243,Q9Y5S9,Q9NW64,P24928,P22626,Q9UMS4,Q13595,P98179,Q5JRI1,H7C1M2
6	GO:0050684	regulation of mRNA processing	Biological Process	11	P38159,P61326,O00422,J3QL05,Q13243,Q9Y5S9,P22626,Q9UMS4,Q13595,P98179,Q08211
6	GO:0032070	regulation of deoxyribonuclease activity	Biological Process	1	P23396
6	GO:0000018	regulation of DNA recombination	Biological Process	5	P16403,Q92522,P09874,P61160,Q86V81
6	GO:0006275	regulation of DNA replication	Biological Process	4	P24941,Q08211,P49916,B4DUA2
6	GO:0006282	regulation of DNA repair	Biological Process	6	P23396,Q08211,P16104,P09874,P61160,P78527
6	GO:0044030	regulation of DNA methylation	Biological Process	1	P09874
6	GO:1901858	regulation of mitochondrial DNA metabolic process	Biological Process	1	P49916
6	GO:2000278	regulation of DNA biosynthetic process	Biological Process	5	Q9H0A0,P17987,P13010,Q15185,P22626
6	GO:1903311	regulation of mRNA metabolic process	Biological Process	17	P38159,P61326,O00422,J3QL05,Q13243,Q9Y5S9,Q9NZI8,Q15717,P63104,Q9Y6M1,O00425,P22626,Q9UMS4,Q13595,P98179,Q08211,Q13151
6	GO:1900542	regulation of purine nucleotide metabolic process	Biological Process	3	Q92621,P09874,P06733
6	GO:0030488	tRNA methylation	Biological Process	2	Q7L0Y3,Q08J23
6	GO:0031167	rRNA methylation	Biological Process	2	Q8IY81,P46087
6	GO:0080009	mRNA methylation	Biological Process	1	Q7L0Y3
6	GO:0016571	histone methylation	Biological Process	2	O75367,P16403
6	GO:0018022	peptidyl-lysine methylation	Biological Process	2	O75367,P16403
6	GO:0019752	carboxylic acid metabolic process	Biological Process	33	Q15185,P11177,P04406,P14618,B4DHM5,Q13584,Q0QF37,Q0QF12,B8ZZ51,Q92621,H0YIC2,Q9H9J7,Q5JTZ9,C9J7S3,A8K5W7,Q9NVC0,U3KQ50,H0YHS6,B3KUZ8,B4DY32,P54886,B4E1E0,C9JIJ6,Q53SY7,B3KMB7,P12277,B4DRH6,H0YIZ0,P13804,P38117,P06733,Q00610,F5H793
6	GO:0006603	phosphocreatine metabolic process	Biological Process	3	B4DNF8,B3KVA7,P12277
6	GO:0046653	tetrahydrofolate metabolic process	Biological Process	1	H0YIZ0
6	GO:0016310	phosphorylation	Biological Process	21	Q96SB3,P78527,P04406,P14618,B4DHM5,Q92621,Q12906,P24941,O14578,P10599,O75367,P30048,A0A024RBS1,Q15185,P25705,P23396,P12956,P13010,P06733,P31151,P68104
6	GO:0006101	citrate metabolic process	Biological Process	4	P11177,Q13584,Q0QF37,Q0QF12
6	GO:0006754	ATP biosynthetic process	Biological Process	10	P04406,P14618,B4DHM5,Q92621,Q0QEN7,P25705,H7C086,B4DL14,P06733,P09874
6	GO:1903578	regulation of ATP metabolic process	Biological Process	3	Q92621,P09874,P06733
6	GO:1903579	negative regulation of ATP metabolic process	Biological Process	1	P09874
6	GO:1903580	positive regulation of ATP metabolic process	Biological Process	1	P06733
6	GO:0006743	ubiquinone metabolic process	Biological Process	1	B4DU83
6	GO:0001676	long-chain fatty acid metabolic process	Biological Process	1	Q15185
6	GO:0033559	unsaturated fatty acid metabolic process	Biological Process	1	Q15185
6	GO:0000723	telomere maintenance	Biological Process	11	Q15185,Q9NY12,P35251,P78527,P13010,Q9H0A0,P17987,P09874,P22626,P12956,E7ESD9
6	GO:0006265	DNA topological change	Biological Process	4	Q5U071,P11388,E9PCY5,B9EG90
6	GO:0006266	DNA ligation	Biological Process	3	P49916,P12956,P11388
6	GO:0006270	DNA replication initiation	Biological Process	5	P24941,A4FS09,B4DDF5,B1AHA9,Q8NHX6
6	GO:0006281	DNA repair	Biological Process	20	B4DEB2,P09874,P16104,P49916,Q9UMS4,P35251,P24928,P17096,P13010,P78527,P12956,P23396,Q08211,P61160,B5BUB1,Q9Y5B9,Q08945,P24941,M0R0Y3,E7ESD9
6	GO:0006297	nucleotide-excision repair, DNA gap filling	Biological Process	2	P49916,P35251
6	GO:0006304	DNA modification	Biological Process	1	P09874
6	GO:0006310	DNA recombination	Biological Process	13	Q86V81,P11388,P09874,P16104,P49916,P78527,P16403,Q92522,P61160,P12956,B5BUB1,P13010,M0R0Y3
6	GO:0015074	DNA integration	Biological Process	1	O75531
6	GO:0022616	DNA strand elongation	Biological Process	1	P49916
6	GO:0032042	mitochondrial DNA metabolic process	Biological Process	3	Q04837,P09874,P49916
6	GO:0045005	DNA-dependent DNA replication maintenance of fidelity	Biological Process	1	Q86V81
6	GO:0031623	receptor internalization	Biological Process	1	Q00610
6	GO:0032799	low-density lipoprotein receptor particle metabolic process	Biological Process	2	P09496,Q00610
6	GO:0006464	cellular protein modification process	Biological Process	23	Q9UMS4,Q96SB3,P78527,Q9NV06,Q12906,P24941,P09874,P18085,P62318,Q96HX3,Q15397,Q92621,O14578,P30048,P23396,P11021,P10599,O75367,P04406,P12956,P13010,P31151,P16403
6	GO:0006733	oxidoreduction coenzyme metabolic process	Biological Process	7	P04406,P14618,B4DHM5,Q92621,B4DU83,P06733,P11177
6	GO:0016070	RNA metabolic process	Biological Process	143	P22626,P09874,O75367,P06733,P16403,Q9P0M6,P10599,P45973,P24941,P35251,Q9H0A0,P05387,P32969,P08708,P23396,P62750,P63173,P30050,P60866,P42677,P62269,P62280,P18124,P36578,Q02878,Q9Y3U8,P38919,P61326,P62424,P42766,P62851,P83881,P26373,P62753,P49207,P25398,Q9Y5S9,Q9UMS4,Q6P2Q9,O94906,P62314,O75533,Q08211,P38159,O00422,J3QL05,Q13243,P62318,P62306,E9PMI6,I3L2C7,A0A087X0X3,P55769,Q86V81,P55795,Q15717,P31…
6	GO:0090305	nucleic acid phosphodiester bond hydrolysis	Biological Process	3	Q15050,P09874,P35251
6	GO:1901607	alpha-amino acid biosynthetic process	Biological Process	4	B4DY32,P54886,B3KMB7,H0YIZ0
6	GO:0043039	tRNA aminoacylation	Biological Process	8	H0YIC2,Q9H9J7,Q5JTZ9,C9J7S3,A8K5W7,Q9NVC0,U3KQ50,H0YHS6
6	GO:0000052	citrulline metabolic process	Biological Process	1	P54886
6	GO:0006591	ornithine metabolic process	Biological Process	1	P54886
6	GO:0009064	glutamine family amino acid metabolic process	Biological Process	5	P54886,B4E1E0,C9JIJ6,Q53SY7,B3KMB7
6	GO:0009066	aspartate family amino acid metabolic process	Biological Process	1	B4DY32
6	GO:0009069	serine family amino acid metabolic process	Biological Process	1	H0YIZ0
6	GO:0016485	protein processing	Biological Process	4	A0A3G2LMJ8,P06733,P09874,P35579
6	GO:0051603	proteolysis involved in cellular protein catabolic process	Biological Process	6	H0YLS6,E5RJR5,Q9UMS4,P11021,P24941,Q9H444
6	GO:0033619	membrane protein proteolysis	Biological Process	2	P35579,P38159
6	GO:0010498	proteasomal protein catabolic process	Biological Process	3	P11021,P24941,Q9UMS4
6	GO:0006006	glucose metabolic process	Biological Process	4	P04406,P06733,P14618,P11177
6	GO:0009117	nucleotide metabolic process	Biological Process	16	P11177,P04406,P14618,B4DHM5,Q92621,H0Y4R1,A0A384N647,P25705,Q0QEN7,H7C086,B4DL14,B4E1E0,P11055,Q9Y623,P06733,P09874
6	GO:0009123	nucleoside monophosphate metabolic process	Biological Process	13	P04406,P14618,B4DHM5,Q92621,A0A384N647,P25705,Q0QEN7,H7C086,B4DL14,P11055,Q9Y623,P06733,P09874
6	GO:0009132	nucleoside diphosphate metabolic process	Biological Process	6	P04406,P14618,B4DHM5,Q92621,A0A384N647,P06733
6	GO:0009141	nucleoside triphosphate metabolic process	Biological Process	14	P04406,P14618,B4DHM5,Q92621,P25705,Q0QEN7,H7C086,B4DL14,B4E1E0,P11055,A0A384N647,Q9Y623,P06733,P09874
6	GO:0033865	nucleoside bisphosphate metabolic process	Biological Process	1	P11177
6	GO:0009259	ribonucleotide metabolic process	Biological Process	15	P11177,P04406,P14618,B4DHM5,Q92621,A0A384N647,P25705,Q0QEN7,H7C086,B4DL14,B4E1E0,P11055,Q9Y623,P06733,P09874
6	GO:0006084	acetyl-CoA metabolic process	Biological Process	1	P11177
6	GO:0006396	RNA processing	Biological Process	84	Q9H0A0,Q9UMS4,Q6P2Q9,O94906,P62314,O75533,Q08211,P38159,P61326,O00422,J3QL05,Q13243,Q9Y5S9,P62318,P62306,E9PMI6,I3L2C7,P22626,A0A087X0X3,P55769,Q86V81,P38919,P55795,Q15717,P31942,B5BU08,Q15365,Q13595,Q13151,Q8NAV1,Q9NW64,Q5H919,P24928,Q15050,Q8IY81,Q9NY12,Q9Y4W2,Q9NV06,A0A0B4J2E5,Q14692,P18124,P42766,Q6DKI1,B4DEN9,Q9GZL7,B5MCF9,P62424,A8K800,Q7L0Y3,P08708,Q9NV31,Q9Y2X3,P42677,Q9NR30,M0R0P1,P62753…
6	GO:0006406	mRNA export from nucleus	Biological Process	7	P22626,Q86V81,P38919,P61326,Q13243,Q9Y5S9,Q92621
6	GO:0140053	mitochondrial gene expression	Biological Process	9	Q7L0Y3,O15235,P82921,H0YG82,Q96EL2,P49411,Q9NWU5,Q96A35,Q5JTZ9
6	GO:0009451	RNA modification	Biological Process	8	Q9H0A0,Q8IY81,Q9NY12,U5U7S7,Q5JTZ9,Q08J23,P46087,Q7L0Y3
6	GO:0006692	prostanoid metabolic process	Biological Process	1	Q15185
6	GO:0019369	arachidonic acid metabolic process	Biological Process	1	Q15185
6	GO:0052042	positive regulation by symbiont of host programmed cell death	Biological Process	1	P04406
6	GO:0006924	activation-induced cell death of T cells	Biological Process	1	P62753
6	GO:0033153	T cell receptor V(D)J recombination	Biological Process	1	P78527
6	GO:0033152	immunoglobulin V(D)J recombination	Biological Process	1	P78527
6	GO:0002372	myeloid dendritic cell cytokine production	Biological Process	1	Q9NR30
6	GO:0002730	regulation of dendritic cell cytokine production	Biological Process	1	Q9NR30
6	GO:0002732	positive regulation of dendritic cell cytokine production	Biological Process	1	Q9NR30
6	GO:0002446	neutrophil mediated immunity	Biological Process	10	P68104,P68371,P12956,P61026,P14618,P31151,P13639,P61160,Q86YZ3,P13010
6	GO:0002886	regulation of myeloid leukocyte mediated immunity	Biological Process	1	Q9NR30
6	GO:0002888	positive regulation of myeloid leukocyte mediated immunity	Biological Process	1	Q9NR30
6	GO:0001969	regulation of activation of membrane attack complex	Biological Process	1	A0A3G2LMJ8
6	GO:0001971	negative regulation of activation of membrane attack complex	Biological Process	1	A0A3G2LMJ8
6	GO:0002431	Fc receptor mediated stimulatory signaling pathway	Biological Process	3	O15144,P61160,O15143
6	GO:0050851	antigen receptor-mediated signaling pathway	Biological Process	1	P23396
6	GO:0048821	erythrocyte development	Biological Process	2	P62753,Q5HYL6
6	GO:0061081	positive regulation of myeloid leukocyte cytokine production involved in immune response	Biological Process	1	Q9NR30
6	GO:0071622	regulation of granulocyte chemotaxis	Biological Process	1	P31151
6	GO:0090025	regulation of monocyte chemotaxis	Biological Process	1	P31151
6	GO:1901623	regulation of lymphocyte chemotaxis	Biological Process	1	P31151
6	GO:2000404	regulation of T cell migration	Biological Process	1	P31151
6	GO:0050670	regulation of lymphocyte proliferation	Biological Process	1	P23396
6	GO:0050863	regulation of T cell activation	Biological Process	1	P23396
6	GO:0050856	regulation of T cell receptor signaling pathway	Biological Process	1	P23396
6	GO:0071624	positive regulation of granulocyte chemotaxis	Biological Process	1	P31151
6	GO:0090026	positive regulation of monocyte chemotaxis	Biological Process	1	P31151
6	GO:0140131	positive regulation of lymphocyte chemotaxis	Biological Process	1	P31151
6	GO:2000406	positive regulation of T cell migration	Biological Process	1	P31151
6	GO:0050671	positive regulation of lymphocyte proliferation	Biological Process	1	P23396
6	GO:0050870	positive regulation of T cell activation	Biological Process	1	P23396
6	GO:0050862	positive regulation of T cell receptor signaling pathway	Biological Process	1	P23396
6	GO:0071346	cellular response to interferon-gamma	Biological Process	3	P04406,P61160,O75369
6	GO:0019886	antigen processing and presentation of exogenous peptide antigen via MHC class II	Biological Process	2	P09496,Q00610
6	GO:0002283	neutrophil activation involved in immune response	Biological Process	10	P68104,P68371,P12956,P61026,P14618,P31151,P13639,P61160,Q86YZ3,P13010
6	GO:0042119	neutrophil activation	Biological Process	10	P68104,P68371,P12956,P61026,P14618,P31151,P13639,P61160,Q86YZ3,P13010
6	GO:0002286	T cell activation involved in immune response	Biological Process	1	P62753
6	GO:0001768	establishment of T cell polarity	Biological Process	1	P35579
6	GO:0030183	B cell differentiation	Biological Process	1	P78527
6	GO:0030217	T cell differentiation	Biological Process	2	P78527,P62753
6	GO:0042098	T cell proliferation	Biological Process	2	P62753,P23396
[truncated: 1,184 more rows]

## Sheet: MF
Level	GO_ID	Term	Type	Seqs_Num	Sequences
1	GO:0003674	molecular_function	Molecular Function	463	P11021,P68371,B7Z5C0,Q15185,B7Z2F4,B3KX11,F8VQ14,P17987,B3KM81,O60884,Q9H072,Q7Z759,Q8TAA5,A1JUI8,P13804,P38117,Q8TBT6,P68104,Q7L0Y3,Q5JTZ9,Q08J23,A8K5W7,P35580,P35579,Q7Z406,P11055,Q9Y623,O75367,P49411,P61026,P18085,E9PLA2,B7ZAY2,Q6FIG4,F5H018,Q8IXJ3,P13639,P62330,P23258,C9IZ01,Q14692,P06733,Q13584,P14618,P11388,P24941,Q6P2Q9,Q5U071,P09874,O43707,Q9P0M6,Q08211,P38159,P17096,Q15365,P23396,P63104,…
2	GO:0140110	transcription regulator activity	Molecular Function	12	P17096,Q15365,P09874,P06733,A0A386NC25,Q15061,Q08211,O43707,O94906,O00422,M0R2I3,P12814
2	GO:0003824	catalytic activity	Molecular Function	169	P13804,P38117,Q8TBT6,P35580,P35579,Q7Z406,P11055,Q9Y623,P49411,P68104,P68371,P61026,P18085,E9PLA2,B7ZAY2,Q6FIG4,F5H018,Q8IXJ3,P13639,P62330,P23258,C9IZ01,Q14692,Q6P2Q9,Q5JTZ9,A8K5W7,Q08211,P12956,A4FS09,B4DDF5,P13010,Q8NHX6,P35251,Q15185,Q9NR30,P38919,Q8N254,F8WE65,P11021,M0QY43,J3QRN6,P14649,E9PDF6,B7Z3E5,D3DTH7,A0A0A0MRM8,Q59FF5,A0A2U3TZL8,A0A384P5W4,A0A0F7G8J1,B4DRH6,B4E1E0,P24928,P23396,P1709…
2	GO:0005198	structural molecule activity	Molecular Function	90	A0A248RGE3,E5RI99,P05387,Q6FG99,K7EJT5,S4R456,P32969,Q5JR95,C9JYQ9,Q9BTQ7,Q8NI62,Q76N57,P08708,P23396,P62750,Q96IR1,F8W7C6,I3L3P7,D6RG13,A0A2R8Y811,A0A2R8Y849,G3V203,P63173,P30050,A0A087WXM6,A0PJ62,B3KS36,J3QQQ9,P60866,E9PQD7,P42677,P62269,J3KMX5,H0YLP6,P62280,P18124,P36578,M0R3D6,M0R210,Q02878,Q9Y3U8,Q0VGL3,Q1JQ76,A0A2R8Y623,O15235,P62424,D3YTB1,E7EX53,D6RD47,F8WBS5,M0R0F0,C9J9K3,P42766,P62851,P…
2	GO:0005215	transporter activity	Molecular Function	11	Q0QEN7,P25705,H7C086,B4DL14,H9E7B8,A8K787,P16615,P05141,P12236,Q5JSD2,P02774
2	GO:0005488	binding	Molecular Function	378	P11021,P68371,B7Z5C0,Q15185,B7Z2F4,B3KX11,F8VQ14,P17987,B3KM81,O60884,Q9H072,Q7Z759,Q8TAA5,A1JUI8,P68104,Q7L0Y3,Q5JTZ9,Q08J23,A8K5W7,O75367,P06733,Q13584,P14618,P11388,P24941,Q5U071,P09874,O43707,Q9P0M6,Q08211,P38159,P23396,P17096,P63104,P78527,Q14690,I3L1L3,Q15061,Q9Y2X3,P16615,P19105,G8JLA2,P08590,P12814,Q9BRL5,P14649,Q96C19,E5RK82,P63316,P31151,Q86YZ3,O14958,A0A087WYV5,Q68DY8,P13639,Q5S4N1,Q7K…
2	GO:0016209	antioxidant activity	Molecular Function	4	V9HW35,P10599,P30048,A0A0A0MRQ5
2	GO:0098772	molecular function regulator	Molecular Function	15	Q8TAA5,O60884,Q96SB3,A0A3S8NFS6,P18085,Q96HS1,P13010,P35251,A0A024RBS1,P04406,Q9NZ48,Q9NSM5,O75367,B4DUA2,P30048
2	GO:0045182	translation regulator activity	Molecular Function	4	Q9NZI8,P38919,Q9Y6M1,O00425
2	GO:0060089	molecular transducer activity	Molecular Function	1	P24941
2	GO:0140104	molecular carrier activity	Molecular Function	3	G3V1N2,Q5XTR9,A8K7D9
3	GO:0003700	DNA-binding transcription factor activity	Molecular Function	5	P17096,Q15365,P09874,P06733,A0A386NC25
3	GO:0003711	transcription elongation regulator activity	Molecular Function	1	Q15061
3	GO:0003712	transcription coregulator activity	Molecular Function	7	Q08211,O43707,P17096,O94906,O00422,M0R2I3,P12814
3	GO:0016491	oxidoreductase activity	Molecular Function	35	P13804,P38117,Q8TBT6,B4DRH6,H0Y4R1,B4DJE7,H9E7B8,P54886,P04406,Q13584,A0A087WVM4,A0A024R652,V9HW35,B3KMB7,P11177,A5YPB6,P10599,Q0QF12,P30048,E9PCX7,E9PJL9,B7Z792,B8ZZ51,F5H793,H0YMU3,L0R875,A0A286YFA2,B4YAH7,A0A384MTJ7,A0A1B0GV49,Q0QF37,A0A0A0MRQ5,G3V5S1,H0YAG8,A0A0U1RQF0
3	GO:0016740	transferase activity	Molecular Function	42	Q15185,P24928,P09874,A0A384N647,B3KUZ8,Q53SY7,B4DNF8,B3KVA7,P12277,A0A0U1RQF0,P54886,A4UJ43,H0YIZ0,B4DFQ8,Q96HX3,Q59HE2,B4DHM5,Q9P134,P78527,Q8IW76,A0A024RCU9,Q96SB3,P24941,O14578,P14618,B1AH48,Q9UMS4,Q05CW7,Q9H0A0,M0R0P1,Q08J23,E9PK47,Q8IY81,Q7L0Y3,P46087,G5E9E9,Q86TW7,H0YD97,D6W539,P04406,F8VU34,B4DY09
3	GO:0016787	hydrolase activity	Molecular Function	80	P35580,P35579,Q7Z406,P11055,Q9Y623,P49411,P68104,P68371,P61026,P18085,E9PLA2,B7ZAY2,Q6FIG4,F5H018,Q8IXJ3,P13639,P62330,P23258,C9IZ01,Q14692,Q5JTZ9,A8K5W7,Q08211,P12956,A4FS09,B4DDF5,P13010,Q8NHX6,P35251,Q9NR30,P38919,Q8N254,P11021,M0QY43,J3QRN6,P14649,E9PDF6,B7Z3E5,D3DTH7,A0A0A0MRM8,Q59FF5,A0A2U3TZL8,A0A384P5W4,A0A0F7G8J1,P11388,E9PCY5,Q0QEN7,P25705,H7C086,B4DL14,Q1RMG2,Q9BSD7,A0A087WVZ4,H0YLS6,C…
3	GO:0016829	lyase activity	Molecular Function	5	B4DRH6,P06733,P12956,P17096,P23396
3	GO:0016853	isomerase activity	Molecular Function	7	F8WE65,B9EG90,P11388,E9PCY5,U5U7S7,Q15185,M0QYT0
3	GO:0016874	ligase activity	Molecular Function	15	B4E1E0,P49916,B4DY32,Q53SY7,A0A087WVM4,A0A024R652,Q15374,H0YIC2,Q9H9J7,Q5JTZ9,C9J7S3,A8K5W7,Q9NVC0,U3KQ50,H0YHS6
3	GO:0140096	catalytic activity, acting on a protein	Molecular Function	18	F8WE65,A0A0F7G8J1,A0A087WVZ4,H0YLS6,Q9P134,P78527,Q8IW76,A0A024RCU9,Q96SB3,P24941,O14578,B3KRM2,Q9UPN1,Q96HS1,Q9UMS4,P11055,P04406,P09874
3	GO:0140097	catalytic activity, acting on DNA	Molecular Function	15	Q08211,P12956,A4FS09,B4DDF5,P13010,Q8NHX6,Q15185,P23396,P17096,P49916,B9EG90,P11388,E9PCY5,B5BUB1,M0R0Y3
3	GO:0140098	catalytic activity, acting on RNA	Molecular Function	18	Q6P2Q9,Q5JTZ9,A8K5W7,Q08211,Q9NR30,P38919,Q8N254,P24928,H0YIC2,Q9H9J7,C9J7S3,Q9NVC0,U3KQ50,H0YHS6,Q8IY81,Q7L0Y3,P46087,Q08J23
3	GO:0003735	structural constituent of ribosome	Molecular Function	75	A0A248RGE3,E5RI99,P05387,Q6FG99,K7EJT5,S4R456,P32969,Q5JR95,C9JYQ9,Q9BTQ7,Q8NI62,Q76N57,P08708,P23396,P62750,Q96IR1,F8W7C6,I3L3P7,D6RG13,A0A2R8Y811,A0A2R8Y849,G3V203,P63173,P30050,A0A087WXM6,A0PJ62,B3KS36,J3QQQ9,P60866,E9PQD7,P42677,P62269,J3KMX5,H0YLP6,P62280,P18124,P36578,M0R3D6,M0R210,Q02878,Q9Y3U8,Q0VGL3,Q1JQ76,A0A2R8Y623,O15235,P62424,D3YTB1,E7EX53,D6RD47,F8WBS5,M0R0F0,C9J9K3,P42766,P62851,P…
3	GO:0005200	structural constituent of cytoskeleton	Molecular Function	6	Q562R1,P68371,O15144,P61160,O15143,P23258
3	GO:0017056	structural constituent of nuclear pore	Molecular Function	1	Q92621
3	GO:0008307	structural constituent of muscle	Molecular Function	2	P08590,P14649
3	GO:0030527	structural constituent of chromatin	Molecular Function	1	P17096
3	GO:0098918	structural constituent of synapse	Molecular Function	2	Q562R1,P12814
3	GO:0022857	transmembrane transporter activity	Molecular Function	11	Q0QEN7,P25705,H7C086,B4DL14,H9E7B8,P16615,P05141,P12236,Q5JSD2,P02774,A8K787
3	GO:0005515	protein binding	Molecular Function	132	P11021,P68371,B7Z5C0,Q15185,B7Z2F4,B3KX11,F8VQ14,P17987,B3KM81,O60884,Q9H072,Q7Z759,Q8TAA5,A1JUI8,P09874,P23396,P17096,Q5U071,P63104,P78527,Q14690,I3L1L3,Q08211,Q15061,Q9Y2X3,P13639,P16104,Q9Y5B9,Q08945,P35580,P35579,B1AK87,O43707,A8K0T9,J3QRN6,C9JUG7,E9PLJ3,Q16643,F6RFD5,E9PDF6,B2R4D5,B7Z3E5,D3DTH7,P61160,K7EJ44,P50402,O75369,Q60FE6,Q59FF5,P02774,P45973,Q7Z406,M0QY43,P12814,O15144,P63316,O15143,…
3	GO:0003682	chromatin binding	Molecular Function	17	Q08211,O43707,O75367,P16403,Q9P0M6,Q9Y5B9,Q08945,B4DZC0,A6NL93,Q92522,P24928,Q04837,P38159,P17096,P11388,P45973,Q8TDG2
3	GO:0030246	carbohydrate binding	Molecular Function	1	B4DIW2
3	GO:0098631	cell adhesion mediator activity	Molecular Function	1	P61026
3	GO:0008289	lipid binding	Molecular Function	1	P02774
3	GO:0008144	drug binding	Molecular Function	106	Q0QEN7,P35580,P35579,Q7Z406,M0QY43,Q08211,B4DNF8,P16615,Q5S4N1,Q9P134,P25705,J3QRN6,B7Z597,P12956,Q9NR30,B4DY09,H0YIC2,B4DXW1,P54886,P38919,B3KVA7,E9PDF6,Q9BSD7,C9J7S3,I3L2G1,B5BUB1,P14618,A4FS09,B4DN41,K7EPJ3,Q562R1,P49916,B4DFQ8,P12277,B7Z2F4,A0A087WVM4,B3KX11,B7Z3E5,D3DTH7,B4E0S6,Q8N254,B4DDF5,H7BXY3,Q53HB9,F8VQ14,H0Y2W2,B4DYP6,P17987,P61160,P11388,B3KRK2,P13010,A0A1X7SBZ2,U3KQ50,Q9H9J7,A0A0A0…
3	GO:0033218	amide binding	Molecular Function	2	A0A0U1RQF0,P09496
3	GO:0036094	small molecule binding	Molecular Function	138	Q8TAA5,O43707,P02774,Q0QEN7,P35580,P35579,Q7Z406,M0QY43,Q08211,B4DNF8,P16615,Q5S4N1,Q9P134,P25705,J3QRN6,B7Z597,P12956,Q9NR30,B4DY09,H0YIC2,B4DXW1,P54886,P38919,B3KVA7,E9PDF6,Q9BSD7,C9J7S3,I3L2G1,B5BUB1,P14618,A4FS09,B4DN41,K7EPJ3,Q562R1,P49916,B4DFQ8,P12277,B7Z2F4,A0A087WVM4,B3KX11,B7Z3E5,D3DTH7,B4E0S6,Q8N254,B4DDF5,H7BXY3,Q53HB9,F8VQ14,H0Y2W2,B4DYP6,P17987,P61160,P11388,B3KRK2,P13010,A0A1X7SBZ2…
3	GO:0042562	hormone binding	Molecular Function	1	P14618
3	GO:0043167	ion binding	Molecular Function	166	P06733,Q13584,P14618,P11388,P24941,P16615,P19105,G8JLA2,O43707,P08590,P12814,Q9BRL5,P14649,Q96C19,E5RK82,P63316,P31151,Q86YZ3,O14958,A0A087WYV5,P11021,Q68DY8,G3V1N2,Q08211,Q9UPN1,A0A386NC25,B7Z5C0,A0A087WVZ4,B5BU08,B4E138,B2RE34,B3KM81,O60884,Q9NW64,A0A075B7D9,Q15374,Q53SY7,O14578,P24928,H9E7B8,Q0QEN7,P35580,P35579,Q7Z406,M0QY43,B4DNF8,Q5S4N1,Q9P134,P25705,J3QRN6,B7Z597,P12956,Q9NR30,B4DY09,H0YIC…
3	GO:0044877	protein-containing complex binding	Molecular Function	47	Q9Y2X3,P35580,P35579,Q7Z406,M0QY43,O43707,P12814,Q16643,O15144,P63316,P13639,O15143,A0A1W2PNV4,A0A0A0MRM8,P11055,Q9Y623,C9JAM8,Q59H95,Q96SB3,O14654,P14618,Q9Y5B9,Q08945,B4DZC0,O75367,P16403,A6NL93,Q92522,P38919,B4DEN9,Q9GZL7,P45973,B5MCF9,O94906,I3L397,P11021,A0A024RBS1,P98179,P62750,Q08211,P62318,P62314,P23396,P12956,Q96HS1,P13010,P09496
3	GO:0048037	cofactor binding	Molecular Function	18	E9PJL9,G3V1N2,Q5XTR9,Q8TBT6,Q59HE2,H0YIZ0,B3KUZ8,E9PK47,A0A0U1RQF0,B7Z792,P13804,B4DJE7,Q0QF12,P04406,P09874,Q13584,A0A286YFA2,P23396
3	GO:0051540	metal cluster binding	Molecular Function	2	P23396,E9PJL9
3	GO:0060090	molecular adaptor activity	Molecular Function	2	P45973,O14654
3	GO:0072341	modified amino acid binding	Molecular Function	1	A0A0U1RQF0
3	GO:0097159	organic cyclic compound binding	Molecular Function	318	P68104,Q7L0Y3,Q5JTZ9,Q08J23,A8K5W7,O75367,Q5U071,Q8TAA5,P09874,O43707,P06733,Q9P0M6,Q08211,P38159,P17096,Q5S4N1,Q7KZ24,C9J7S3,B4DN41,K7EPJ3,B4E0S6,H7BXY3,Q53HB9,B4DYP6,B3KRK2,B3KVL5,A0A1X7SBZ2,G3V3B0,E9PNG3,A4FU77,A8K6V3,B3KM65,A2I829,P23396,Q96KK5,K7EMV3,O75531,P42677,P12956,P18124,P16104,C9J0D1,Q12906,Q02878,Q5TEC6,Q5T6W2,Q5T7C4,A4FS09,Q6E433,A0A087X270,P49916,B4DDF5,E5KSX8,Q08945,P11388,H7C5P4…
3	GO:0097367	carbohydrate derivative binding	Molecular Function	122	O43707,Q0QEN7,P35580,P35579,Q7Z406,M0QY43,Q08211,B4DNF8,P16615,Q5S4N1,Q9P134,P25705,J3QRN6,B7Z597,P12956,Q9NR30,B4DY09,H0YIC2,B4DXW1,P54886,P38919,B3KVA7,E9PDF6,Q9BSD7,C9J7S3,I3L2G1,B5BUB1,P14618,A4FS09,B4DN41,K7EPJ3,Q562R1,P49916,B4DFQ8,P12277,B7Z2F4,A0A087WVM4,B3KX11,B7Z3E5,D3DTH7,B4E0S6,Q8N254,B4DDF5,H7BXY3,Q53HB9,F8VQ14,H0Y2W2,B4DYP6,P17987,P61160,P11388,B3KRK2,P13010,A0A1X7SBZ2,U3KQ50,Q9H9J7…
3	GO:1901363	heterocyclic compound binding	Molecular Function	317	P68104,Q7L0Y3,Q5JTZ9,Q08J23,A8K5W7,O75367,Q5U071,Q8TAA5,P09874,O43707,P06733,Q9P0M6,Q08211,P38159,P17096,Q5S4N1,Q7KZ24,C9J7S3,B4DN41,K7EPJ3,B4E0S6,H7BXY3,Q53HB9,B4DYP6,B3KRK2,B3KVL5,A0A1X7SBZ2,G3V3B0,E9PNG3,A4FU77,A8K6V3,B3KM65,A2I829,P23396,Q96KK5,K7EMV3,O75531,P42677,P12956,P18124,P16104,C9J0D1,Q12906,Q02878,Q5TEC6,Q5T6W2,Q5T7C4,A4FS09,Q6E433,A0A087X270,P49916,B4DDF5,E5KSX8,Q08945,P11388,H7C5P4…
3	GO:1901681	sulfur compound binding	Molecular Function	1	A0A3S8NFS6
3	GO:0004601	peroxidase activity	Molecular Function	2	P30048,V9HW35
3	GO:0004791	thioredoxin-disulfide reductase activity	Molecular Function	1	P10599
3	GO:0051920	peroxiredoxin activity	Molecular Function	3	P30048,A0A0A0MRQ5,V9HW35
3	GO:0005085	guanyl-nucleotide exchange factor activity	Molecular Function	1	P18085
3	GO:0030234	enzyme regulator activity	Molecular Function	14	Q8TAA5,O60884,Q96SB3,A0A3S8NFS6,Q96HS1,P13010,P35251,A0A024RBS1,P04406,Q9NZ48,O75367,B4DUA2,P30048,Q9NSM5
3	GO:0097472	cyclin-dependent protein kinase activity	Molecular Function	1	P24941
3	GO:0005344	oxygen carrier activity	Molecular Function	2	G3V1N2,Q5XTR9
3	GO:0140142	nucleocytoplasmic carrier activity	Molecular Function	1	A8K7D9
4	GO:0000981	DNA-binding transcription factor activity, RNA polymerase II-specific	Molecular Function	4	P09874,P06733,P17096,Q15365
4	GO:0003713	transcription coactivator activity	Molecular Function	5	O43707,P12814,P17096,Q08211,O94906
4	GO:0003714	transcription corepressor activity	Molecular Function	2	O00422,M0R2I3
4	GO:0009055	electron transfer activity	Molecular Function	4	H9E7B8,P13804,P38117,Q8TBT6
4	GO:0016651	oxidoreductase activity, acting on NAD(P)H	Molecular Function	5	P10599,E9PCX7,P30048,E9PJL9,B7Z792
4	GO:0015002	heme-copper terminal oxidase activity	Molecular Function	1	H9E7B8
4	GO:0016614	oxidoreductase activity, acting on CH-OH group of donors	Molecular Function	9	B4DRH6,H0Y4R1,Q13584,B8ZZ51,F5H793,H0YMU3,L0R875,A0A286YFA2,Q0QF37
4	GO:0016903	oxidoreductase activity, acting on the aldehyde or oxo group of donors	Molecular Function	7	P54886,P04406,P11177,A5YPB6,B4YAH7,A0A384MTJ7,A0A1B0GV49
4	GO:0016627	oxidoreductase activity, acting on the CH-CH group of donors	Molecular Function	2	B4DJE7,Q0QF12
4	GO:0016645	oxidoreductase activity, acting on the CH-NH group of donors	Molecular Function	3	A0A087WVM4,A0A024R652,B3KMB7
4	GO:0016667	oxidoreductase activity, acting on a sulfur group of donors	Molecular Function	2	P10599,P30048
4	GO:0016675	oxidoreductase activity, acting on a heme group of donors	Molecular Function	1	H9E7B8
4	GO:0016684	oxidoreductase activity, acting on peroxide as acceptor	Molecular Function	3	V9HW35,P30048,A0A0A0MRQ5
4	GO:0016741	transferase activity, transferring one-carbon groups	Molecular Function	7	Q53SY7,H0YIZ0,M0R0P1,Q08J23,Q8IY81,Q7L0Y3,P46087
4	GO:0016746	transferase activity, transferring acyl groups	Molecular Function	7	A0A0U1RQF0,Q05CW7,Q9H0A0,D6W539,F8VU34,Q86TW7,H0YD97
4	GO:0016757	transferase activity, transferring glycosyl groups	Molecular Function	3	P09874,Q96HX3,E9PK47
4	GO:0016765	transferase activity, transferring alkyl or aryl (other than methyl) groups	Molecular Function	2	A4UJ43,B4DFQ8
4	GO:0016769	transferase activity, transferring nitrogenous groups	Molecular Function	3	B3KUZ8,Q59HE2,P04406
4	GO:0016772	transferase activity, transferring phosphorus-containing groups	Molecular Function	17	Q15185,P24928,A0A384N647,B4DNF8,B3KVA7,P12277,P54886,B4DHM5,Q9P134,P78527,Q8IW76,A0A024RCU9,Q96SB3,P24941,O14578,P14618,G5E9E9
4	GO:0016782	transferase activity, transferring sulfur-containing groups	Molecular Function	1	B1AH48
4	GO:0019787	ubiquitin-like protein transferase activity	Molecular Function	1	Q9UMS4
4	GO:0008233	peptidase activity	Molecular Function	3	A0A0F7G8J1,A0A087WVZ4,H0YLS6
4	GO:0016788	hydrolase activity, acting on ester bonds	Molecular Function	10	Q5JTZ9,A8K5W7,Q9Y4W2,P23396,B3KRM2,Q9UPN1,Q96HS1,P11055,Q9BSD7,A0A0U1RQF0
4	GO:0016798	hydrolase activity, acting on glycosyl bonds	Molecular Function	2	B4DIW2,P23396
4	GO:0016801	hydrolase activity, acting on ether bonds	Molecular Function	1	Q1RMG2
4	GO:0016810	hydrolase activity, acting on carbon-nitrogen (but not peptide) bonds	Molecular Function	2	C9JIJ6,Q53SY7
4	GO:0016817	hydrolase activity, acting on acid anhydrides	Molecular Function	64	P35580,P35579,Q7Z406,P11055,Q9Y623,P49411,P68104,P68371,P61026,P18085,E9PLA2,B7ZAY2,Q6FIG4,F5H018,Q8IXJ3,P13639,P62330,P23258,C9IZ01,Q14692,Q08211,P12956,A4FS09,B4DDF5,P13010,Q8NHX6,P35251,Q9NR30,P38919,Q8N254,P11021,M0QY43,J3QRN6,P14649,E9PDF6,B7Z3E5,D3DTH7,A0A0A0MRM8,Q59FF5,A0A2U3TZL8,A0A384P5W4,P11388,E9PCY5,Q0QEN7,P25705,H7C086,B4DL14,Q9BSD7,Q5S4N1,B4DN41,B4E0S6,H7BXY3,B4DYP6,B3KRK2,A0A1X7SBZ…
4	GO:0017171	serine hydrolase activity	Molecular Function	1	A0A0F7G8J1
4	GO:0016835	carbon-oxygen lyase activity	Molecular Function	5	B4DRH6,P06733,P12956,P17096,P23396
4	GO:0003916	DNA topoisomerase activity	Molecular Function	3	B9EG90,P11388,E9PCY5
4	GO:0016859	cis-trans isomerase activity	Molecular Function	1	F8WE65
4	GO:0016860	intramolecular oxidoreductase activity	Molecular Function	2	Q15185,M0QYT0
4	GO:0016866	intramolecular transferase activity	Molecular Function	1	U5U7S7
4	GO:0016875	ligase activity, forming carbon-oxygen bonds	Molecular Function	8	H0YIC2,Q9H9J7,Q5JTZ9,C9J7S3,A8K5W7,Q9NVC0,U3KQ50,H0YHS6
4	GO:0016879	ligase activity, forming carbon-nitrogen bonds	Molecular Function	6	B4E1E0,B4DY32,Q53SY7,A0A087WVM4,A0A024R652,Q15374
4	GO:0016886	ligase activity, forming phosphoric ester bonds	Molecular Function	1	P49916
4	GO:0003755	peptidyl-prolyl cis-trans isomerase activity	Molecular Function	1	F8WE65
4	GO:0004672	protein kinase activity	Molecular Function	7	P24941,P78527,O14578,Q9P134,Q8IW76,A0A024RCU9,Q96SB3
4	GO:0004721	phosphoprotein phosphatase activity	Molecular Function	4	Q9UPN1,Q96HS1,P11055,B3KRM2
4	GO:0035605	peptidyl-cysteine S-nitrosylase activity	Molecular Function	1	P04406
4	GO:1990404	protein ADP-ribosylase activity	Molecular Function	1	P09874
4	GO:0003678	DNA helicase activity	Molecular Function	8	Q08211,B5BUB1,M0R0Y3,P12956,A4FS09,B4DDF5,P13010,Q8NHX6
4	GO:0003906	DNA-(apurinic or apyrimidinic site) endonuclease activity	Molecular Function	2	P23396,P17096
4	GO:0003909	DNA ligase activity	Molecular Function	1	P49916
4	GO:0004536	deoxyribonuclease activity	Molecular Function	1	P23396
4	GO:0019104	DNA N-glycosylase activity	Molecular Function	1	P23396
4	GO:0033677	DNA/RNA helicase activity	Molecular Function	1	Q08211
4	GO:0034061	DNA polymerase activity	Molecular Function	1	Q15185
4	GO:0051575	5'-deoxyribose-5-phosphate lyase activity	Molecular Function	2	P12956,P17096
4	GO:0000386	second spliceosomal transesterification activity	Molecular Function	1	Q6P2Q9
4	GO:0003724	RNA helicase activity	Molecular Function	4	Q08211,Q9NR30,P38919,Q8N254
4	GO:0008173	RNA methyltransferase activity	Molecular Function	4	Q8IY81,Q7L0Y3,P46087,Q08J23
4	GO:0097747	RNA polymerase activity	Molecular Function	1	P24928
4	GO:0140101	catalytic activity, acting on a tRNA	Molecular Function	10	Q5JTZ9,A8K5W7,H0YIC2,Q9H9J7,C9J7S3,Q9NVC0,U3KQ50,H0YHS6,Q7L0Y3,Q08J23
4	GO:0140102	catalytic activity, acting on a rRNA	Molecular Function	2	Q8IY81,P46087
4	GO:0098973	structural constituent of postsynaptic actin cytoskeleton	Molecular Function	1	Q562R1
4	GO:0099186	structural constituent of postsynapse	Molecular Function	2	Q562R1,P12814
4	GO:0015075	ion transmembrane transporter activity	Molecular Function	9	Q0QEN7,P25705,H7C086,B4DL14,H9E7B8,P16615,P05141,P12236,Q5JSD2
4	GO:0015205	nucleobase transmembrane transporter activity	Molecular Function	1	P05141
4	GO:0090482	vitamin transmembrane transporter activity	Molecular Function	1	P02774
4	GO:0015238	drug transmembrane transporter activity	Molecular Function	2	P05141,P12236
4	GO:0015318	inorganic molecular entity transmembrane transporter activity	Molecular Function	7	Q0QEN7,P25705,H7C086,B4DL14,H9E7B8,P16615,Q5JSD2
4	GO:0015605	organophosphate ester transmembrane transporter activity	Molecular Function	2	P05141,P12236
4	GO:0015932	nucleobase-containing compound transmembrane transporter activity	Molecular Function	2	P05141,P12236
4	GO:0022803	passive transmembrane transporter activity	Molecular Function	1	Q5JSD2
4	GO:0022804	active transmembrane transporter activity	Molecular Function	7	Q0QEN7,P25705,H7C086,B4DL14,P16615,P05141,P12236
4	GO:1901505	carbohydrate derivative transmembrane transporter activity	Molecular Function	2	P05141,P12236
4	GO:0044183	protein binding involved in protein folding	Molecular Function	1	P11021
4	GO:0051082	unfolded protein binding	Molecular Function	14	P68371,B7Z5C0,Q15185,B7Z2F4,B3KX11,F8VQ14,P17987,B3KM81,O60884,Q9H072,P11021,Q7Z759,Q8TAA5,A1JUI8
4	GO:0008134	transcription factor binding	Molecular Function	14	Q08211,Q9Y2X3,P09874,Q9NV06,O43707,P17096,O94906,P45973,P23396,Q5U071,P63104,P78527,Q14690,I3L1L3
4	GO:0001098	basal transcription machinery binding	Molecular Function	3	Q08211,Q15061,Q9Y2X3
4	GO:0002039	p53 binding	Molecular Function	1	P13639
4	GO:0042393	histone binding	Molecular Function	4	P45973,P16104,Q9Y5B9,Q08945
4	GO:0051087	chaperone binding	Molecular Function	4	Q15185,O60884,P11021,Q8TAA5
4	GO:0030674	protein binding, bridging	Molecular Function	2	O14654,P45973
4	GO:0005102	signaling receptor binding	Molecular Function	15	P18085,O14654,P35579,O43707,P12814,P09874,Q9NV06,Q96SB3,P16615,P68371,P25705,P17096,O94906,Q00610,P31151
4	GO:0050839	cell adhesion molecule binding	Molecular Function	22	P35579,O43707,P12814,P62750,Q16643,P06733,Q02878,Q96C19,P62424,P14618,P49207,Q15365,P13639,P63104,Q9H444,P50402,Q92522,P26641,A0A024R1X8,P11021,O75369,P61026
4	GO:0051018	protein kinase A binding	Molecular Function	1	P23396
4	GO:0005516	calmodulin binding	Molecular Function	5	P35580,P35579,Q7Z406,P11055,Q9Y623
4	GO:0005522	profilin binding	Molecular Function	1	Q16643
4	GO:0046983	protein dimerization activity	Molecular Function	20	P35579,O43707,O75531,P12814,P18124,P06733,Q15717,P63316,Q9H444,P11388,P45973,O14958,Q8TAA5,Q96KK5,K7EMV3,O75367,P16104,C9J0D1,Q5TEC6,Q9P0M6
4	GO:0008022	protein C-terminus binding	Molecular Function	8	P16615,O75531,P12956,P30048,P11388,P13010,Q96SB3,P24928
4	GO:0008092	cytoskeletal protein binding	Molecular Function	43	P35580,P35579,B1AK87,O43707,A8K0T9,J3QRN6,C9JUG7,E9PLJ3,Q16643,F6RFD5,E9PDF6,B2R4D5,B7Z3E5,D3DTH7,P61160,K7EJ44,P50402,O75369,Q60FE6,Q59FF5,P02774,Q7Z406,M0QY43,P12814,O15144,P63316,P13639,O15143,A0A1W2PNV4,A0A0A0MRM8,P11055,Q9Y623,C9JAM8,Q59H95,Q96SB3,P08590,Q5HYL6,P04406,P23396,A0A2U3TZL8,A0A024RC67,A0A384P5W4,P61026
4	GO:0042802	identical protein binding	Molecular Function	25	P35579,O43707,O75531,P12814,P18124,P06733,Q15717,P63316,Q9H444,P11388,P45973,O14958,Q8TAA5,P22626,P09874,P04406,Q9NR30,P38159,P54886,P14618,P63104,P30048,Q9UMS4,P23258,O75369
4	GO:0051787	misfolded protein binding	Molecular Function	1	P11021
4	GO:0031072	heat shock protein binding	Molecular Function	6	P23396,Q15185,B7Z5C0,B3KM81,O60884,P11021
4	GO:0019899	enzyme binding	Molecular Function	38	Q08211,Q15061,P11388,P18085,Q96SB3,P68104,P23396,P30048,P09874,O75367,Q15717,P62753,P13639,P63104,Q13151,A0A024RBS1,Q00610,P05141,P12277,P17987,P13010,P11021,P24928,P62330,P45973,Q13243,P06733,P09496,Q9Y2X3,P55769,Q15185,Q9H0A0,P16615,P62318,O75531,P16104,P17096,P78527
4	GO:0019904	protein domain specific binding	Molecular Function	14	O14578,P04406,Q00610,O75531,P35579,K7EM20,P38159,B4DMT8,B5BU24,P63104,P24941,P78527,P11021,P35251
4	GO:0030276	clathrin binding	Molecular Function	2	P09496,Q00610
4	GO:0030332	cyclin binding	Molecular Function	2	P12956,P24941
4	GO:0032182	ubiquitin-like protein binding	Molecular Function	1	P11388
4	GO:0044325	ion channel binding	Molecular Function	4	O43707,P12814,P63104,Q96SB3
4	GO:0043495	protein membrane anchor	Molecular Function	1	P35579
4	GO:0043532	angiostatin binding	Molecular Function	1	P25705
4	GO:0043548	phosphatidylinositol 3-kinase binding	Molecular Function	1	O14654
4	GO:0044548	S100 protein binding	Molecular Function	1	P16615
4	GO:0045294	alpha-catenin binding	Molecular Function	1	A0A024R1X8
4	GO:0046332	SMAD binding	Molecular Function	1	P09874
4	GO:0047485	protein N-terminus binding	Molecular Function	4	P09874,O43707,O75531,P62330
4	GO:0048306	calcium-dependent protein binding	Molecular Function	3	P63316,O14958,Q9NW64
4	GO:0061676	importin-alpha family protein binding	Molecular Function	1	Q08211
4	GO:0097110	scaffold protein binding	Molecular Function	1	O14578
4	GO:0098632	cell-cell adhesion mediator activity	Molecular Function	1	P61026
4	GO:0140030	modification-dependent protein binding	Molecular Function	2	P45973,Q6P2Q9
4	GO:0031490	chromatin DNA binding	Molecular Function	7	O75367,P16403,A6NL93,Q92522,Q08211,O43707,Q9P0M6
4	GO:0031491	nucleosome binding	Molecular Function	7	O75367,P16403,A6NL93,Q92522,Q9Y5B9,Q08945,B4DZC0
4	GO:1990841	promoter-specific chromatin binding	Molecular Function	3	Q08211,O75367,P24928
4	GO:0005496	steroid binding	Molecular Function	1	P02774
4	GO:0005524	ATP binding	Molecular Function	98	Q0QEN7,P35580,P35579,Q7Z406,M0QY43,Q08211,B4DNF8,P16615,Q5S4N1,Q9P134,P25705,J3QRN6,B7Z597,P12956,Q9NR30,B4DY09,H0YIC2,B4DXW1,P54886,P38919,B3KVA7,E9PDF6,Q9BSD7,C9J7S3,I3L2G1,B5BUB1,P14618,A4FS09,B4DN41,K7EPJ3,Q562R1,P49916,B4DFQ8,P12277,B7Z2F4,A0A087WVM4,B3KX11,B7Z3E5,D3DTH7,B4E0S6,Q8N254,B4DDF5,H7BXY3,Q53HB9,F8VQ14,H0Y2W2,B4DYP6,P17987,P61160,P11388,B3KRK2,P13010,A0A1X7SBZ2,U3KQ50,Q9H9J7,A0A0A0…
4	GO:0019825	oxygen binding	Molecular Function	2	G3V1N2,Q5XTR9
4	GO:0070279	vitamin B6 binding	Molecular Function	4	Q59HE2,H0YIZ0,B3KUZ8,E9PK47
4	GO:1902118	calcidiol binding	Molecular Function	1	P02774
4	GO:0031177	phosphopantetheine binding	Molecular Function	1	A0A0U1RQF0
4	GO:0042277	peptide binding	Molecular Function	1	P09496
4	GO:0000166	nucleotide binding	Molecular Function	129	Q8TAA5,Q0QEN7,P35580,P35579,Q7Z406,M0QY43,Q08211,B4DNF8,P16615,Q5S4N1,Q9P134,P25705,J3QRN6,B7Z597,P12956,Q9NR30,B4DY09,H0YIC2,B4DXW1,P54886,P38919,B3KVA7,E9PDF6,Q9BSD7,C9J7S3,I3L2G1,B5BUB1,P14618,A4FS09,B4DN41,K7EPJ3,Q562R1,P49916,B4DFQ8,P12277,B7Z2F4,A0A087WVM4,B3KX11,B7Z3E5,D3DTH7,B4E0S6,Q8N254,B4DDF5,H7BXY3,Q53HB9,F8VQ14,H0Y2W2,B4DYP6,P17987,P61160,P11388,B3KRK2,P13010,A0A1X7SBZ2,U3KQ50,Q9H9J7…
4	GO:0001882	nucleoside binding	Molecular Function	24	P49411,P68104,F8VP99,B4E190,P68371,P61026,X1WI22,P18085,E9PLA2,B7ZAY2,Q6FIG4,F5H018,A0A024R2Z6,Q8N4P8,Q8IXJ3,P13639,B4DPI9,Q9Y5M8,P62330,P23258,A0A384N647,C9IZ01,Q14692,O43707
4	GO:0019842	vitamin binding	Molecular Function	6	P02774,Q59HE2,H0YIZ0,B3KUZ8,E9PK47,A0A0U1RQF0
4	GO:0043177	organic acid binding	Molecular Function	2	Q5JTZ9,Q53SY7
4	GO:0070324	thyroid hormone binding	Molecular Function	1	P14618
4	GO:0043168	anion binding	Molecular Function	129	Q0QEN7,P35580,P35579,Q7Z406,M0QY43,Q08211,B4DNF8,P16615,Q5S4N1,Q9P134,P25705,J3QRN6,B7Z597,P12956,Q9NR30,B4DY09,H0YIC2,B4DXW1,P54886,P38919,B3KVA7,E9PDF6,Q9BSD7,C9J7S3,I3L2G1,B5BUB1,P14618,A4FS09,B4DN41,K7EPJ3,Q562R1,P49916,B4DFQ8,P12277,B7Z2F4,A0A087WVM4,B3KX11,B7Z3E5,D3DTH7,B4E0S6,Q8N254,B4DDF5,H7BXY3,Q53HB9,F8VQ14,H0Y2W2,B4DYP6,P17987,P61160,P11388,B3KRK2,P13010,A0A1X7SBZ2,U3KQ50,Q9H9J7,A0A0A0…
4	GO:0043169	cation binding	Molecular Function	50	P06733,Q13584,P14618,P11388,P24941,P16615,P19105,G8JLA2,O43707,P08590,P12814,Q9BRL5,P14649,Q96C19,E5RK82,P63316,P31151,Q86YZ3,O14958,A0A087WYV5,P11021,Q68DY8,G3V1N2,Q08211,Q9UPN1,A0A386NC25,B7Z5C0,A0A087WVZ4,B5BU08,B4E138,B2RE34,B3KM81,O60884,Q9NW64,A0A075B7D9,Q15374,Q53SY7,O14578,P24928,H9E7B8,P09874,A0A0B4J1Z1,P42677,P49916,B3KVL5,M0R2I3,D6REM6,H0YAG8,Q5JTZ9,Q59EC6
4	GO:0001094	TFIID-class transcription factor complex binding	Molecular Function	1	Q9Y2X3
4	GO:0051015	actin filament binding	Molecular Function	18	P35580,P35579,Q7Z406,M0QY43,O43707,P12814,Q16643,O15144,P63316,P13639,O15143,A0A1W2PNV4,A0A0A0MRM8,P11055,Q9Y623,C9JAM8,Q59H95,Q96SB3
4	GO:0005158	insulin receptor binding	Molecular Function	1	O14654
4	GO:0005178	integrin binding	Molecular Function	3	P35579,O43707,P12814
4	GO:0023023	MHC protein complex binding	Molecular Function	1	P14618
4	GO:0043021	ribonucleoprotein complex binding	Molecular Function	14	I3L397,P13639,P11021,A0A024RBS1,P98179,Q08211,P62318,P62314,P38919,B4DEN9,Q9GZL7,P45973,B5MCF9,O94906
4	GO:1904841	TORC2 complex binding	Molecular Function	1	P62750
4	GO:0020037	heme binding	Molecular Function	3	G3V1N2,Q5XTR9,Q8TBT6
4	GO:0048038	quinone binding	Molecular Function	1	B7Z792
4	GO:0050662	coenzyme binding	Molecular Function	13	E9PJL9,Q59HE2,H0YIZ0,B3KUZ8,E9PK47,P13804,B4DJE7,Q0QF12,P04406,P09874,Q13584,B7Z792,A0A286YFA2
4	GO:0051536	iron-sulfur cluster binding	Molecular Function	2	E9PJL9,P23396
4	GO:0035591	signaling adaptor activity	Molecular Function	1	O14654
4	GO:0003676	nucleic acid binding	Molecular Function	230	P68104,Q7L0Y3,Q5JTZ9,Q08J23,A8K5W7,O75367,Q5U071,P09874,O43707,P06733,Q9P0M6,Q08211,P38159,P17096,P23396,Q96KK5,K7EMV3,O75531,P42677,P12956,P18124,P16104,C9J0D1,Q12906,Q02878,Q5TEC6,Q5T6W2,Q5T7C4,A4FS09,Q6E433,A0A087X270,P49916,B4DDF5,E5KSX8,Q08945,P11388,H7C5P4,P13010,B4DUA2,Q15397,Q8NHX6,B4DZC0,E9PCY5,I3L1L3,P35251,B9EG90,B4DSH1,P24928,B4DEB2,B1AHA9,P16403,Q92522,P78527,Q04837,Q15365,P35579,P22…
4	GO:0046906	tetrapyrrole binding	Molecular Function	3	G3V1N2,Q5XTR9,Q8TBT6
4	GO:1901265	nucleoside phosphate binding	Molecular Function	129	Q8TAA5,Q0QEN7,P35580,P35579,Q7Z406,M0QY43,Q08211,B4DNF8,P16615,Q5S4N1,Q9P134,P25705,J3QRN6,B7Z597,P12956,Q9NR30,B4DY09,H0YIC2,B4DXW1,P54886,P38919,B3KVA7,E9PDF6,Q9BSD7,C9J7S3,I3L2G1,B5BUB1,P14618,A4FS09,B4DN41,K7EPJ3,Q562R1,P49916,B4DFQ8,P12277,B7Z2F4,A0A087WVM4,B3KX11,B7Z3E5,D3DTH7,B4E0S6,Q8N254,B4DDF5,H7BXY3,Q53HB9,F8VQ14,H0Y2W2,B4DYP6,P17987,P61160,P11388,B3KRK2,P13010,A0A1X7SBZ2,U3KQ50,Q9H9J7…
4	GO:0005539	glycosaminoglycan binding	Molecular Function	1	A0A3S8NFS6
4	GO:0032553	ribonucleotide binding	Molecular Function	120	Q0QEN7,P35580,P35579,Q7Z406,M0QY43,Q08211,B4DNF8,P16615,Q5S4N1,Q9P134,P25705,J3QRN6,B7Z597,P12956,Q9NR30,B4DY09,H0YIC2,B4DXW1,P54886,P38919,B3KVA7,E9PDF6,Q9BSD7,C9J7S3,I3L2G1,B5BUB1,P14618,A4FS09,B4DN41,K7EPJ3,Q562R1,P49916,B4DFQ8,P12277,B7Z2F4,A0A087WVM4,B3KX11,B7Z3E5,D3DTH7,B4E0S6,Q8N254,B4DDF5,H7BXY3,Q53HB9,F8VQ14,H0Y2W2,B4DYP6,P17987,P61160,P11388,B3KRK2,P13010,A0A1X7SBZ2,U3KQ50,Q9H9J7,A0A0A0…
4	GO:0008201	heparin binding	Molecular Function	1	A0A3S8NFS6
4	GO:0008379	thioredoxin peroxidase activity	Molecular Function	1	P30048
4	GO:0005086	ARF guanyl-nucleotide exchange factor activity	Molecular Function	1	P18085
4	GO:0004857	enzyme inhibitor activity	Molecular Function	5	Q96SB3,A0A3S8NFS6,P04406,O75367,P30048
4	GO:0008047	enzyme activator activity	Molecular Function	4	O60884,Q96HS1,P13010,P35251
4	GO:0019207	kinase regulator activity	Molecular Function	2	A0A024RBS1,O75367
4	GO:0019208	phosphatase regulator activity	Molecular Function	2	Q96SB3,Q9NZ48
4	GO:0030337	DNA polymerase processivity factor activity	Molecular Function	1	B4DUA2
4	GO:0043028	cysteine-type endopeptidase regulator activity involved in apoptotic process	Molecular Function	1	P30048
4	GO:0060589	nucleoside-triphosphatase regulator activity	Molecular Function	3	Q8TAA5,O60884,Q96HS1
4	GO:0061134	peptidase regulator activity	Molecular Function	3	A0A3S8NFS6,P04406,P30048
4	GO:0004693	cyclin-dependent protein serine/threonine kinase activity	Molecular Function	1	P24941
4	GO:0061608	nuclear import signal receptor activity	Molecular Function	1	A8K7D9
5	GO:0001228	DNA-binding transcription activator activity, RNA polymerase II-specific	Molecular Function	1	P09874
5	GO:0001227	DNA-binding transcription repressor activity, RNA polymerase II-specific	Molecular Function	1	P06733
5	GO:0030374	nuclear receptor transcription coactivator activity	Molecular Function	3	O43707,P12814,P17096
5	GO:0004129	cytochrome-c oxidase activity	Molecular Function	1	H9E7B8
5	GO:0016652	oxidoreductase activity, acting on NAD(P)H, NAD(P) as acceptor	Molecular Function	1	E9PCX7
5	GO:0016668	oxidoreductase activity, acting on a sulfur group of donors, NAD(P) as acceptor	Molecular Function	2	P10599,P30048
5	GO:0016615	malate dehydrogenase activity	Molecular Function	2	Q0QF37,B8ZZ51
5	GO:0016616	oxidoreductase activity, acting on the CH-OH group of donors, NAD or NADP as acceptor	Molecular Function	9	B4DRH6,H0Y4R1,Q13584,Q0QF37,F5H793,B8ZZ51,H0YMU3,L0R875,A0A286YFA2
5	GO:0004738	pyruvate dehydrogenase activity	Molecular Function	2	P11177,A5YPB6
5	GO:0016620	oxidoreductase activity, acting on the aldehyde or oxo group of donors, NAD or NADP as acceptor	Molecular Function	5	P54886,P04406,B4YAH7,A0A384MTJ7,A0A1B0GV49
5	GO:0016624	oxidoreductase activity, acting on the aldehyde or oxo group of donors, disulfide as acceptor	Molecular Function	2	P11177,A5YPB6
5	GO:0000104	succinate dehydrogenase activity	Molecular Function	1	Q0QF12
5	GO:0003995	acyl-CoA dehydrogenase activity	Molecular Function	1	B4DJE7
5	GO:0016635	oxidoreductase activity, acting on the CH-CH group of donors, quinone or related compound as acceptor	Molecular Function	1	Q0QF12
5	GO:0016646	oxidoreductase activity, acting on the CH-NH group of donors, NAD or NADP as acceptor	Molecular Function	3	A0A087WVM4,A0A024R652,B3KMB7
5	GO:0015036	disulfide oxidoreductase activity	Molecular Function	1	P10599
5	GO:0016676	oxidoreductase activity, acting on a heme group of donors, oxygen as acceptor	Molecular Function	1	H9E7B8
5	GO:0008168	methyltransferase activity	Molecular Function	5	Q8IY81,Q7L0Y3,P46087,Q08J23,M0R0P1
5	GO:0016742	hydroxymethyl-, formyl- and related transferase activity	Molecular Function	1	H0YIZ0
5	GO:0016743	carboxyl- or carbamoyltransferase activity	Molecular Function	1	Q53SY7
5	GO:0016747	transferase activity, transferring acyl groups other than amino-acyl groups	Molecular Function	4	A0A0U1RQF0,Q05CW7,Q9H0A0,D6W539
5	GO:0046912	transferase activity, transferring acyl groups, acyl groups converted into alkyl on transfer	Molecular Function	1	F8VU34
5	GO:0016758	transferase activity, transferring hexosyl groups	Molecular Function	2	Q96HX3,E9PK47
5	GO:0016763	transferase activity, transferring pentosyl groups	Molecular Function	1	P09874
5	GO:0004364	glutathione transferase activity	Molecular Function	1	A4UJ43
5	GO:0004478	methionine adenosyltransferase activity	Molecular Function	1	B4DFQ8
5	GO:0008483	transaminase activity	Molecular Function	2	B3KUZ8,Q59HE2
5	GO:0016301	kinase activity	Molecular Function	15	A0A384N647,B4DNF8,B3KVA7,P12277,P54886,B4DHM5,Q9P134,P78527,Q8IW76,A0A024RCU9,Q96SB3,P24941,O14578,P14618,G5E9E9
5	GO:0016773	phosphotransferase activity, alcohol group as acceptor	Molecular Function	8	Q9P134,P78527,Q8IW76,A0A024RCU9,Q96SB3,P24941,O14578,P14618
5	GO:0016774	phosphotransferase activity, carboxyl group as acceptor	Molecular Function	2	P54886,B4DHM5
5	GO:0016775	phosphotransferase activity, nitrogenous group as acceptor	Molecular Function	3	B4DNF8,B3KVA7,P12277
5	GO:0016776	phosphotransferase activity, phosphate group as acceptor	Molecular Function	1	A0A384N647
5	GO:0016779	nucleotidyltransferase activity	Molecular Function	2	Q15185,P24928
5	GO:0016783	sulfurtransferase activity	Molecular Function	1	B1AH48
5	GO:0004842	ubiquitin-protein transferase activity	Molecular Function	1	Q9UMS4
5	GO:0061659	ubiquitin-like protein ligase activity	Molecular Function	1	Q9UMS4
5	GO:0070011	peptidase activity, acting on L-amino acid peptides	Molecular Function	3	A0A0F7G8J1,A0A087WVZ4,H0YLS6
5	GO:0004518	nuclease activity	Molecular Function	2	Q9Y4W2,P23396
5	GO:0042578	phosphoric ester hydrolase activity	Molecular Function	5	B3KRM2,Q9UPN1,Q96HS1,P11055,Q9BSD7
5	GO:0052689	carboxylic ester hydrolase activity	Molecular Function	2	Q5JTZ9,A8K5W7
5	GO:0004553	hydrolase activity, hydrolyzing O-glycosyl compounds	Molecular Function	1	B4DIW2
5	GO:0016799	hydrolase activity, hydrolyzing N-glycosyl compounds	Molecular Function	1	P23396
5	GO:0016802	trialkylsulfonium hydrolase activity	Molecular Function	1	Q1RMG2
5	GO:0016811	hydrolase activity, acting on carbon-nitrogen (but not peptide) bonds, in linear amides	Molecular Function	1	C9JIJ6
5	GO:0016812	hydrolase activity, acting on carbon-nitrogen (but not peptide) bonds, in cyclic amides	Molecular Function	1	Q53SY7
5	GO:0016818	hydrolase activity, acting on acid anhydrides, in phosphorus-containing anhydrides	Molecular Function	64	P35580,P35579,Q7Z406,P11055,Q9Y623,P49411,P68104,P68371,P61026,P18085,E9PLA2,B7ZAY2,Q6FIG4,F5H018,Q8IXJ3,P13639,P62330,P23258,C9IZ01,Q14692,Q08211,P12956,A4FS09,B4DDF5,P13010,Q8NHX6,P35251,Q9NR30,P38919,Q8N254,P11021,M0QY43,J3QRN6,P14649,E9PDF6,B7Z3E5,D3DTH7,A0A0A0MRM8,Q59FF5,A0A2U3TZL8,A0A384P5W4,P11388,E9PCY5,Q0QEN7,P25705,H7C086,B4DL14,Q9BSD7,Q5S4N1,B4DN41,B4E0S6,H7BXY3,B4DYP6,B3KRK2,A0A1X7SBZ…
5	GO:0008236	serine-type peptidase activity	Molecular Function	1	A0A0F7G8J1
5	GO:0016836	hydro-lyase activity	Molecular Function	2	B4DRH6,P06733
5	GO:0140078	class I DNA-(apurinic or apyrimidinic site) endonuclease activity	Molecular Function	1	P23396
5	GO:0003917	DNA topoisomerase type I activity	Molecular Function	1	B9EG90
5	GO:0061505	DNA topoisomerase II activity	Molecular Function	2	P11388,E9PCY5
5	GO:0016863	intramolecular oxidoreductase activity, transposing C=C bonds	Molecular Function	1	M0QYT0
5	GO:0050220	prostaglandin-E synthase activity	Molecular Function	1	Q15185
5	GO:0009982	pseudouridine synthase activity	Molecular Function	1	U5U7S7
5	GO:0004812	aminoacyl-tRNA ligase activity	Molecular Function	8	Q5JTZ9,C9J7S3,A8K5W7,Q9NVC0,U3KQ50,H0YHS6,H0YIC2,Q9H9J7
5	GO:0003883	CTP synthase activity	Molecular Function	1	B4E1E0
5	GO:0004329	formate-tetrahydrofolate ligase activity	Molecular Function	2	A0A087WVM4,A0A024R652
5	GO:0004637	phosphoribosylamine-glycine ligase activity	Molecular Function	1	Q15374
5	GO:0016884	carbon-nitrogen ligase activity, with glutamine as amido-N-donor	Molecular Function	2	B4DY32,Q53SY7
5	GO:0004674	protein serine/threonine kinase activity	Molecular Function	3	P78527,P24941,O14578
5	GO:0004722	protein serine/threonine phosphatase activity	Molecular Function	3	P11055,Q9UPN1,Q96HS1
5	GO:0004003	ATP-dependent DNA helicase activity	Molecular Function	1	Q08211
5	GO:0043138	3'-5' DNA helicase activity	Molecular Function	1	Q08211
5	GO:0043139	5'-3' DNA helicase activity	Molecular Function	2	B5BUB1,M0R0Y3
5	GO:0003910	DNA ligase (ATP) activity	Molecular Function	1	P49916
5	GO:0004520	endodeoxyribonuclease activity	Molecular Function	1	P23396
5	GO:0000702	oxidized base lesion DNA N-glycosylase activity	Molecular Function	1	P23396
5	GO:0033679	3'-5' DNA/RNA helicase activity	Molecular Function	1	Q08211
5	GO:0003964	RNA-directed DNA polymerase activity	Molecular Function	1	Q15185
5	GO:0034458	3'-5' RNA helicase activity	Molecular Function	1	Q08211
5	GO:0008174	mRNA methyltransferase activity	Molecular Function	1	Q7L0Y3
5	GO:0008175	tRNA methyltransferase activity	Molecular Function	2	Q7L0Y3,Q08J23
5	GO:0008649	rRNA methyltransferase activity	Molecular Function	2	Q8IY81,P46087
5	GO:0034062	5'-3' RNA polymerase activity	Molecular Function	1	P24928
5	GO:0002161	aminoacyl-tRNA editing activity	Molecular Function	2	Q5JTZ9,A8K5W7
5	GO:0005216	ion channel activity	Molecular Function	1	Q5JSD2
5	GO:0008324	cation transmembrane transporter activity	Molecular Function	6	Q0QEN7,P25705,H7C086,B4DL14,H9E7B8,P16615
5	GO:0008509	anion transmembrane transporter activity	Molecular Function	3	P05141,P12236,Q5JSD2
5	GO:0022839	ion gated channel activity	Molecular Function	1	Q5JSD2
5	GO:0022853	active ion transmembrane transporter activity	Molecular Function	5	Q0QEN7,P25705,H7C086,B4DL14,P16615
5	GO:0099516	ion antiporter activity	Molecular Function	2	P05141,P12236
5	GO:0005345	purine nucleobase transmembrane transporter activity	Molecular Function	1	P05141
5	GO:0005347	ATP transmembrane transporter activity	Molecular Function	2	P05141,P12236
5	GO:0015103	inorganic anion transmembrane transporter activity	Molecular Function	1	Q5JSD2
5	GO:0022890	inorganic cation transmembrane transporter activity	Molecular Function	6	Q0QEN7,P25705,H7C086,B4DL14,H9E7B8,P16615
5	GO:0015215	nucleotide transmembrane transporter activity	Molecular Function	2	P05141,P12236
5	GO:0015267	channel activity	Molecular Function	1	Q5JSD2
5	GO:0015291	secondary active transmembrane transporter activity	Molecular Function	2	P05141,P12236
5	GO:0015399	primary active transmembrane transporter activity	Molecular Function	5	Q0QEN7,P25705,H7C086,B4DL14,P16615
5	GO:0005346	purine ribonucleotide transmembrane transporter activity	Molecular Function	2	P05141,P12236
5	GO:0001085	RNA polymerase II transcription factor binding	Molecular Function	2	Q9Y2X3,Q08211
5	GO:0035257	nuclear hormone receptor binding	Molecular Function	5	P09874,Q9NV06,O43707,P17096,O94906
5	GO:0070491	repressing transcription factor binding	Molecular Function	1	P45973
5	GO:0001099	basal RNA polymerase II transcription machinery binding	Molecular Function	3	Q08211,Q15061,Q9Y2X3
5	GO:0035064	methylated histone binding	Molecular Function	1	P45973
5	GO:0005070	SH3/SH2 adaptor activity	Molecular Function	1	O14654
5	GO:0001664	G protein-coupled receptor binding	Molecular Function	2	Q96SB3,P16615
5	GO:0042287	MHC protein binding	Molecular Function	2	P68371,P25705
5	GO:0042975	peroxisome proliferator activated receptor binding	Molecular Function	1	P17096
5	GO:0050786	RAGE receptor binding	Molecular Function	1	P31151
5	GO:0051427	hormone receptor binding	Molecular Function	5	P09874,Q9NV06,O43707,P17096,O94906
5	GO:0070325	lipoprotein particle receptor binding	Molecular Function	1	Q00610
5	GO:0070851	growth factor receptor binding	Molecular Function	1	P18085
5	GO:0045296	cadherin binding	Molecular Function	20	P61026,P35579,P62750,Q16643,P06733,Q02878,Q96C19,P62424,P14618,P49207,Q15365,P13639,P63104,Q9H444,P50402,Q92522,P26641,A0A024R1X8,P11021,O75369
5	GO:0042803	protein homodimerization activity	Molecular Function	13	P35579,O43707,O75531,P12814,P18124,P06733,Q15717,P63316,Q9H444,P11388,P45973,O14958,Q8TAA5
5	GO:0046982	protein heterodimerization activity	Molecular Function	8	Q96KK5,K7EMV3,O75367,P16104,C9J0D1,Q5TEC6,Q9P0M6,P11388
5	GO:0003779	actin binding	Molecular Function	36	P35580,P35579,Q7Z406,M0QY43,O43707,P12814,Q16643,O15144,P63316,P13639,O15143,A0A1W2PNV4,A0A0A0MRM8,P11055,Q9Y623,C9JAM8,Q59H95,Q96SB3,P08590,B1AK87,A8K0T9,J3QRN6,C9JUG7,E9PLJ3,F6RFD5,E9PDF6,B2R4D5,B7Z3E5,D3DTH7,P61160,K7EJ44,P50402,O75369,Q60FE6,Q59FF5,P02774
5	GO:0005523	tropomyosin binding	Molecular Function	1	Q5HYL6
5	GO:0015631	tubulin binding	Molecular Function	6	P04406,P23396,A0A2U3TZL8,A0A024RC67,A0A384P5W4,P50402
5	GO:0017022	myosin binding	Molecular Function	2	P61026,P08590
5	GO:0017166	vinculin binding	Molecular Function	1	P12814
5	GO:0031013	troponin I binding	Molecular Function	1	P63316
5	GO:0031014	troponin T binding	Molecular Function	1	P63316
5	GO:0051879	Hsp90 protein binding	Molecular Function	2	P23396,Q15185
5	GO:0030544	Hsp70 protein binding	Molecular Function	1	P23396
5	GO:0002020	protease binding	Molecular Function	1	Q00610
5	GO:0019900	kinase binding	Molecular Function	15	P11388,P09874,P68104,P23396,O75367,Q15717,P62753,P13639,P63104,P30048,Q13151,A0A024RBS1,Q00610,Q13243,Q96SB3
5	GO:0019902	phosphatase binding	Molecular Function	1	Q96SB3
5	GO:0031996	thioesterase binding	Molecular Function	1	P62330
5	GO:0042826	histone deacetylase binding	Molecular Function	3	P09874,P11388,P45973
5	GO:0044389	ubiquitin-like protein ligase binding	Molecular Function	7	P05141,P12277,P63104,P17987,P13010,P11021,P24928
5	GO:0044390	ubiquitin-like protein conjugating enzyme binding	Molecular Function	1	P23396
5	GO:0051020	GTPase binding	Molecular Function	3	P18085,P06733,P09496
5	GO:0051117	ATPase binding	Molecular Function	2	Q9Y2X3,P55769
5	GO:0070063	RNA polymerase binding	Molecular Function	2	Q08211,Q15061
5	GO:0070182	DNA polymerase binding	Molecular Function	2	Q15185,Q9H0A0
5	GO:0017124	SH3 domain binding	Molecular Function	1	O14578
5	GO:0030165	PDZ domain binding	Molecular Function	1	O14578
5	GO:0097718	disordered domain specific binding	Molecular Function	2	P04406,Q00610
5	GO:0097726	LEM domain binding	Molecular Function	1	O75531
5	GO:0032050	clathrin heavy chain binding	Molecular Function	1	P09496
5	GO:0032051	clathrin light chain binding	Molecular Function	1	Q00610
5	GO:0043130	ubiquitin binding	Molecular Function	1	P11388
5	GO:0070412	R-SMAD binding	Molecular Function	1	P09874
5	GO:0098641	cadherin binding involved in cell-cell adhesion	Molecular Function	1	P61026
5	GO:0031593	polyubiquitin modification-dependent protein binding	Molecular Function	1	Q6P2Q9
5	GO:0140034	methylation-dependent protein binding	Molecular Function	1	P45973
5	GO:0031492	nucleosomal DNA binding	Molecular Function	4	O75367,P16403,A6NL93,Q92522
5	GO:0005499	vitamin D binding	Molecular Function	1	P02774
5	GO:0030170	pyridoxal phosphate binding	Molecular Function	4	Q59HE2,H0YIZ0,B3KUZ8,E9PK47
5	GO:0017076	purine nucleotide binding	Molecular Function	120	Q8TAA5,Q0QEN7,P35580,P35579,Q7Z406,M0QY43,Q08211,B4DNF8,P16615,Q5S4N1,Q9P134,P25705,J3QRN6,B7Z597,P12956,Q9NR30,B4DY09,H0YIC2,B4DXW1,P54886,P38919,B3KVA7,E9PDF6,Q9BSD7,C9J7S3,I3L2G1,B5BUB1,P14618,A4FS09,B4DN41,K7EPJ3,Q562R1,P49916,B4DFQ8,P12277,B7Z2F4,A0A087WVM4,B3KX11,B7Z3E5,D3DTH7,B4E0S6,Q8N254,B4DDF5,H7BXY3,Q53HB9,F8VQ14,H0Y2W2,B4DYP6,P17987,P61160,P11388,B3KRK2,P13010,A0A1X7SBZ2,U3KQ50,Q9H9J7…
5	GO:0050660	flavin adenine dinucleotide binding	Molecular Function	3	P13804,B4DJE7,Q0QF12
5	GO:0050661	NADP binding	Molecular Function	1	P04406
5	GO:0051287	NAD binding	Molecular Function	6	P09874,P04406,Q13584,E9PJL9,B7Z792,A0A286YFA2
5	GO:0001883	purine nucleoside binding	Molecular Function	23	P49411,P68104,F8VP99,B4E190,P68371,P61026,X1WI22,P18085,E9PLA2,B7ZAY2,Q6FIG4,F5H018,A0A024R2Z6,Q8N4P8,Q8IXJ3,P13639,B4DPI9,Q9Y5M8,P62330,P23258,A0A384N647,C9IZ01,Q14692
5	GO:0032549	ribonucleoside binding	Molecular Function	23	P49411,P68104,F8VP99,B4E190,P68371,P61026,X1WI22,P18085,E9PLA2,B7ZAY2,Q6FIG4,F5H018,A0A024R2Z6,Q8N4P8,Q8IXJ3,P13639,B4DPI9,Q9Y5M8,P62330,P23258,A0A384N647,C9IZ01,Q14692
5	GO:0031406	carboxylic acid binding	Molecular Function	2	Q5JTZ9,Q53SY7
5	GO:0010181	FMN binding	Molecular Function	1	E9PJL9
5	GO:0019003	GDP binding	Molecular Function	1	P61026
5	GO:0035639	purine ribonucleoside triphosphate binding	Molecular Function	119	Q0QEN7,P35580,P35579,Q7Z406,M0QY43,Q08211,B4DNF8,P16615,Q5S4N1,Q9P134,P25705,J3QRN6,B7Z597,P12956,Q9NR30,B4DY09,H0YIC2,B4DXW1,P54886,P38919,B3KVA7,E9PDF6,Q9BSD7,C9J7S3,I3L2G1,B5BUB1,P14618,A4FS09,B4DN41,K7EPJ3,Q562R1,P49916,B4DFQ8,P12277,B7Z2F4,A0A087WVM4,B3KX11,B7Z3E5,D3DTH7,B4E0S6,Q8N254,B4DDF5,H7BXY3,Q53HB9,F8VQ14,H0Y2W2,B4DYP6,P17987,P61160,P11388,B3KRK2,P13010,A0A1X7SBZ2,U3KQ50,Q9H9J7,A0A0A0…
5	GO:0043531	ADP binding	Molecular Function	4	P35580,P35579,P25705,P14618
5	GO:0046872	metal ion binding	Molecular Function	50	P06733,Q13584,P14618,P11388,P24941,P16615,P19105,G8JLA2,O43707,P08590,P12814,Q9BRL5,P14649,Q96C19,E5RK82,P63316,P31151,Q86YZ3,O14958,A0A087WYV5,P11021,Q68DY8,H9E7B8,P09874,A0A0B4J1Z1,P42677,P49916,B3KVL5,M0R2I3,D6REM6,H0YAG8,Q5JTZ9,Q59EC6,G3V1N2,Q08211,Q9UPN1,A0A386NC25,B7Z5C0,A0A087WVZ4,B5BU08,B4E138,B2RE34,B3KM81,O60884,Q9NW64,A0A075B7D9,Q15374,Q53SY7,O14578,P24928
5	GO:0023026	MHC class II protein complex binding	Molecular Function	1	P14618
5	GO:0043022	ribosome binding	Molecular Function	4	I3L397,P13639,P11021,A0A024RBS1
5	GO:0043023	ribosomal large subunit binding	Molecular Function	1	P98179
5	GO:0070990	snRNP binding	Molecular Function	2	P62318,P62314
5	GO:1905172	RISC complex binding	Molecular Function	1	Q08211
5	GO:1905538	polysome binding	Molecular Function	1	Q08211
5	GO:0051539	4 iron, 4 sulfur cluster binding	Molecular Function	1	E9PJL9
5	GO:0001067	regulatory region nucleic acid binding	Molecular Function	12	P09874,O43707,O75367,P06733,Q9P0M6,Q08211,P38159,P17096,Q5U071,A0A386NC25,P12956,P13010
5	GO:0003677	DNA binding	Molecular Function	53	O75367,Q5U071,P09874,O43707,P06733,Q9P0M6,Q08211,P38159,P17096,P23396,P12956,P16104,P13010,B4DEB2,B1AHA9,P35251,P16403,Q92522,P78527,Q04837,Q15365,P11388,A0A386NC25,A6NL93,P22626,Q96KK5,K7EMV3,O75531,P42677,P18124,C9J0D1,Q12906,Q02878,Q5TEC6,Q5T6W2,Q5T7C4,A4FS09,Q6E433,A0A087X270,P49916,B4DDF5,E5KSX8,Q08945,H7C5P4,B4DUA2,Q15397,Q8NHX6,B4DZC0,E9PCY5,I3L1L3,B9EG90,B4DSH1,P24928
5	GO:0003723	RNA binding	Molecular Function	182	P68104,Q7L0Y3,Q5JTZ9,Q08J23,A8K5W7,Q08211,P68371,P12814,Q9NR30,Q12906,Q15717,Q9Y623,Q00610,P38159,P22626,P23396,Q9NZI8,P18124,P38919,P42766,Q9Y5S9,Q15365,Q13151,O75533,A0A0F7L0Q8,Q59GC1,Q9Y6M1,O00425,Q5VU21,A6NJH9,P49411,I3L397,C9JG32,P13639,P26641,A4D1M6,C9IZ01,A0A2R8Y6J3,Q15050,Q9NW64,Q6P2Q9,P32969,P62750,Q9NV31,P30050,P62269,P62280,A8K800,Q9H9Y2,Q9Y2X3,P55769,O43818,Q14692,Q9NY12,P35580,P62318…
5	GO:0032555	purine ribonucleotide binding	Molecular Function	119	Q0QEN7,P35580,P35579,Q7Z406,M0QY43,Q08211,B4DNF8,P16615,Q5S4N1,Q9P134,P25705,J3QRN6,B7Z597,P12956,Q9NR30,B4DY09,H0YIC2,B4DXW1,P54886,P38919,B3KVA7,E9PDF6,Q9BSD7,C9J7S3,I3L2G1,B5BUB1,P14618,A4FS09,B4DN41,K7EPJ3,Q562R1,P49916,B4DFQ8,P12277,B7Z2F4,A0A087WVM4,B3KX11,B7Z3E5,D3DTH7,B4E0S6,Q8N254,B4DDF5,H7BXY3,Q53HB9,F8VQ14,H0Y2W2,B4DYP6,P17987,P61160,P11388,B3KRK2,P13010,A0A1X7SBZ2,U3KQ50,Q9H9J7,A0A0A0…
5	GO:0030414	peptidase inhibitor activity	Molecular Function	3	A0A3S8NFS6,P04406,P30048
5	GO:0019210	kinase inhibitor activity	Molecular Function	1	O75367
5	GO:0019212	phosphatase inhibitor activity	Molecular Function	1	Q96SB3
5	GO:0001671	ATPase activator activity	Molecular Function	1	O60884
5	GO:0005096	GTPase activator activity	Molecular Function	1	Q96HS1
5	GO:0019887	protein kinase regulator activity	Molecular Function	2	O75367,A0A024RBS1
5	GO:0019888	protein phosphatase regulator activity	Molecular Function	2	Q96SB3,Q9NZ48
5	GO:0043027	cysteine-type endopeptidase inhibitor activity involved in apoptotic process	Molecular Function	1	P30048
5	GO:0030695	GTPase regulator activity	Molecular Function	1	Q96HS1
5	GO:0060590	ATPase regulator activity	Molecular Function	2	Q8TAA5,O60884
5	GO:0061135	endopeptidase regulator activity	Molecular Function	3	A0A3S8NFS6,P04406,P30048
6	GO:0008746	NAD(P)+ transhydrogenase activity	Molecular Function	1	E9PCX7
6	GO:0008785	alkyl hydroperoxide reductase activity	Molecular Function	1	P30048
6	GO:0030060	L-malate dehydrogenase activity	Molecular Function	1	Q0QF37
6	GO:0003857	3-hydroxyacyl-CoA dehydrogenase activity	Molecular Function	1	B4DRH6
6	GO:0003938	IMP dehydrogenase activity	Molecular Function	1	H0Y4R1
6	GO:0004448	isocitrate dehydrogenase activity	Molecular Function	1	Q13584
6	GO:0004739	pyruvate dehydrogenase (acetyl-transferring) activity	Molecular Function	2	P11177,A5YPB6
6	GO:0004350	glutamate-5-semialdehyde dehydrogenase activity	Molecular Function	1	P54886
6	GO:0043891	glyceraldehyde-3-phosphate dehydrogenase (NAD(P)+) (phosphorylating) activity	Molecular Function	1	P04406
6	GO:0008177	succinate dehydrogenase (ubiquinone) activity	Molecular Function	1	Q0QF12
6	GO:0004488	methylenetetrahydrofolate dehydrogenase (NADP+) activity	Molecular Function	2	A0A087WVM4,A0A024R652
6	GO:0004735	pyrroline-5-carboxylate reductase activity	Molecular Function	1	B3KMB7
6	GO:0015035	protein disulfide oxidoreductase activity	Molecular Function	1	P10599
6	GO:0015037	peptide disulfide oxidoreductase activity	Molecular Function	1	P10599
6	GO:0008169	C-methyltransferase activity	Molecular Function	1	P46087
6	GO:0008171	O-methyltransferase activity	Molecular Function	1	Q8IY81
6	GO:0008757	S-adenosylmethionine-dependent methyltransferase activity	Molecular Function	4	Q8IY81,Q7L0Y3,P46087,Q08J23
6	GO:0004372	glycine hydroxymethyltransferase activity	Molecular Function	1	H0YIZ0
6	GO:0004070	aspartate carbamoyltransferase activity	Molecular Function	1	Q53SY7
6	GO:0004312	fatty acid synthase activity	Molecular Function	1	A0A0U1RQF0
6	GO:0016407	acetyltransferase activity	Molecular Function	2	Q05CW7,Q9H0A0
6	GO:0016410	N-acyltransferase activity	Molecular Function	2	Q05CW7,Q9H0A0
6	GO:0004576	oligosaccharyl transferase activity	Molecular Function	1	Q96HX3
6	GO:0004645	phosphorylase activity	Molecular Function	1	E9PK47
6	GO:0102250	linear malto-oligosaccharide phosphorylase activity	Molecular Function	1	E9PK47
6	GO:0102499	SHG alpha-glucan phosphorylase activity	Molecular Function	1	E9PK47
6	GO:0003950	NAD+ ADP-ribosyltransferase activity	Molecular Function	1	P09874
6	GO:0004069	L-aspartate:2-oxoglutarate aminotransferase activity	Molecular Function	1	B3KUZ8
6	GO:0004587	ornithine-oxo-acid transaminase activity	Molecular Function	1	Q59HE2
6	GO:0004111	creatine kinase activity	Molecular Function	3	B4DNF8,B3KVA7,P12277
6	GO:0004618	phosphoglycerate kinase activity	Molecular Function	1	B4DHM5
6	GO:0019202	amino acid kinase activity	Molecular Function	1	P54886
6	GO:0019205	nucleobase-containing compound kinase activity	Molecular Function	1	A0A384N647
6	GO:0004743	pyruvate kinase activity	Molecular Function	1	P14618
6	GO:0004349	glutamate 5-kinase activity	Molecular Function	1	P54886
6	GO:0004550	nucleoside diphosphate kinase activity	Molecular Function	1	A0A384N647
6	GO:0046899	nucleoside triphosphate adenylate kinase activity	Molecular Function	1	A0A384N647
6	GO:0050145	nucleoside monophosphate kinase activity	Molecular Function	1	A0A384N647
6	GO:0004792	thiosulfate sulfurtransferase activity	Molecular Function	1	B1AH48
6	GO:0061630	ubiquitin protein ligase activity	Molecular Function	1	Q9UMS4
6	GO:0004175	endopeptidase activity	Molecular Function	3	A0A0F7G8J1,A0A087WVZ4,H0YLS6
6	GO:0008237	metallopeptidase activity	Molecular Function	1	A0A087WVZ4
6	GO:0070003	threonine-type peptidase activity	Molecular Function	1	H0YLS6
6	GO:0004519	endonuclease activity	Molecular Function	2	P23396,Q9Y4W2
6	GO:0016791	phosphatase activity	Molecular Function	5	B3KRM2,Q9UPN1,Q96HS1,P11055,Q9BSD7
6	GO:0004013	adenosylhomocysteinase activity	Molecular Function	1	Q1RMG2
6	GO:0004359	glutaminase activity	Molecular Function	1	C9JIJ6
6	GO:0016462	pyrophosphatase activity	Molecular Function	64	P35580,P35579,Q7Z406,P11055,Q9Y623,P49411,P68104,P68371,P61026,P18085,E9PLA2,B7ZAY2,Q6FIG4,F5H018,Q8IXJ3,P13639,P62330,P23258,C9IZ01,Q14692,Q08211,P12956,A4FS09,B4DDF5,P13010,Q8NHX6,P35251,Q9NR30,P38919,Q8N254,P11021,M0QY43,J3QRN6,P14649,E9PDF6,B7Z3E5,D3DTH7,A0A0A0MRM8,Q59FF5,A0A2U3TZL8,A0A384P5W4,P11388,E9PCY5,Q0QEN7,P25705,H7C086,B4DL14,Q9BSD7,Q5S4N1,B4DN41,B4E0S6,H7BXY3,B4DYP6,B3KRK2,A0A1X7SBZ…
6	GO:0004252	serine-type endopeptidase activity	Molecular Function	1	A0A0F7G8J1
6	GO:0004300	enoyl-CoA hydratase activity	Molecular Function	1	B4DRH6
6	GO:0004634	phosphopyruvate hydratase activity	Molecular Function	1	P06733
6	GO:0003918	DNA topoisomerase type II (ATP-hydrolyzing) activity	Molecular Function	2	P11388,E9PCY5
6	GO:0051750	delta3,5-delta2,4-dienoyl-CoA isomerase activity	Molecular Function	1	M0QYT0
6	GO:0004813	alanine-tRNA ligase activity	Molecular Function	1	Q5JTZ9
6	GO:0004815	aspartate-tRNA ligase activity	Molecular Function	1	C9J7S3
6	GO:0004822	isoleucine-tRNA ligase activity	Molecular Function	1	A8K5W7
6	GO:0004823	leucine-tRNA ligase activity	Molecular Function	1	Q9NVC0
6	GO:0004829	threonine-tRNA ligase activity	Molecular Function	1	U3KQ50
6	GO:0004831	tyrosine-tRNA ligase activity	Molecular Function	1	H0YHS6
6	GO:0004066	asparagine synthase (glutamine-hydrolyzing) activity	Molecular Function	1	B4DY32
6	GO:0004088	carbamoyl-phosphate synthase (glutamine-hydrolyzing) activity	Molecular Function	1	Q53SY7
6	GO:0004677	DNA-dependent protein kinase activity	Molecular Function	1	P78527
6	GO:0017018	myosin phosphatase activity	Molecular Function	1	P11055
6	GO:0017116	single-stranded DNA-dependent ATP-dependent DNA helicase activity	Molecular Function	1	Q08211
6	GO:0043140	ATP-dependent 3'-5' DNA helicase activity	Molecular Function	1	Q08211
6	GO:0008534	oxidized purine nucleobase lesion DNA N-glycosylase activity	Molecular Function	1	P23396
6	GO:0003720	telomerase activity	Molecular Function	1	Q15185
6	GO:0061953	mRNA (adenine-N1-)-methyltransferase activity	Molecular Function	1	Q7L0Y3
6	GO:0016423	tRNA (guanine) methyltransferase activity	Molecular Function	1	Q7L0Y3
6	GO:0016426	tRNA (adenine) methyltransferase activity	Molecular Function	1	Q7L0Y3
6	GO:0016427	tRNA (cytosine) methyltransferase activity	Molecular Function	1	Q08J23
6	GO:0016434	rRNA (cytosine) methyltransferase activity	Molecular Function	1	P46087
6	GO:0016435	rRNA (guanine) methyltransferase activity	Molecular Function	1	Q8IY81
6	GO:0016436	rRNA (uridine) methyltransferase activity	Molecular Function	1	Q8IY81
6	GO:0003899	DNA-directed 5'-3' RNA polymerase activity	Molecular Function	1	P24928
6	GO:0003968	RNA-directed 5'-3' RNA polymerase activity	Molecular Function	1	P24928
6	GO:0005253	anion channel activity	Molecular Function	1	Q5JSD2
6	GO:0008514	organic anion transmembrane transporter activity	Molecular Function	2	P05141,P12236
6	GO:0015301	anion:anion antiporter activity	Molecular Function	2	P05141,P12236
6	GO:0005244	voltage-gated ion channel activity	Molecular Function	1	Q5JSD2
6	GO:0042625	ATPase coupled ion transmembrane transporter activity	Molecular Function	5	Q0QEN7,P25705,H7C086,B4DL14,P16615
6	GO:0015207	adenine transmembrane transporter activity	Molecular Function	1	P05141
6	GO:0005471	ATP:ADP antiporter activity	Molecular Function	2	P05141,P12236
6	GO:0019829	cation-transporting ATPase activity	Molecular Function	5	Q0QEN7,P25705,H7C086,B4DL14,P16615
6	GO:0046873	metal ion transmembrane transporter activity	Molecular Function	1	P16615
6	GO:0015077	monovalent inorganic cation transmembrane transporter activity	Molecular Function	6	Q0QEN7,P25705,H7C086,B4DL14,H9E7B8,P16615
6	GO:0015216	purine nucleotide transmembrane transporter activity	Molecular Function	2	P05141,P12236
6	GO:0022836	gated channel activity	Molecular Function	1	Q5JSD2
6	GO:0022838	substrate-specific channel activity	Molecular Function	1	Q5JSD2
6	GO:0015297	antiporter activity	Molecular Function	2	P05141,P12236
6	GO:0015405	P-P-bond-hydrolysis-driven transmembrane transporter activity	Molecular Function	5	Q0QEN7,P25705,H7C086,B4DL14,P16615
6	GO:0015217	ADP transmembrane transporter activity	Molecular Function	2	P05141,P12236
6	GO:0001091	RNA polymerase II basal transcription factor binding	Molecular Function	1	Q9Y2X3
6	GO:0035258	steroid hormone receptor binding	Molecular Function	3	P09874,Q9NV06,O94906
6	GO:0042974	retinoic acid receptor binding	Molecular Function	2	P17096,O43707
6	GO:0000993	RNA polymerase II complex binding	Molecular Function	2	Q08211,Q15061
6	GO:0031775	lutropin-choriogonadotropic hormone receptor binding	Molecular Function	1	P16615
6	GO:0050780	dopamine receptor binding	Molecular Function	1	Q96SB3
6	GO:0042288	MHC class I protein binding	Molecular Function	2	P68371,P25705
6	GO:0050750	low-density lipoprotein particle receptor binding	Molecular Function	1	Q00610
6	GO:0005154	epidermal growth factor receptor binding	Molecular Function	1	P18085
6	GO:0003785	actin monomer binding	Molecular Function	1	P08590
6	GO:0008017	microtubule binding	Molecular Function	5	P04406,P23396,A0A2U3TZL8,A0A024RC67,A0A384P5W4
6	GO:0048487	beta-tubulin binding	Molecular Function	1	P50402
6	GO:0031489	myosin V binding	Molecular Function	1	P61026
6	GO:0032036	myosin heavy chain binding	Molecular Function	1	P08590
6	GO:0045159	myosin II binding	Molecular Function	1	P08590
6	GO:1990381	ubiquitin-specific protease binding	Molecular Function	1	Q00610
6	GO:0019901	protein kinase binding	Molecular Function	14	P11388,Q13243,P09874,P68104,P23396,O75367,Q15717,P62753,P13639,P63104,P30048,Q13151,A0A024RBS1,Q00610
6	GO:0019903	protein phosphatase binding	Molecular Function	1	Q96SB3
6	GO:0031625	ubiquitin protein ligase binding	Molecular Function	7	P05141,P12277,P63104,P17987,P13010,P11021,P24928
6	GO:0043175	RNA polymerase core enzyme binding	Molecular Function	2	Q08211,Q15061
6	GO:0070530	K63-linked polyubiquitin modification-dependent protein binding	Molecular Function	1	Q6P2Q9
6	GO:1902271	D3 vitamins binding	Molecular Function	1	P02774
6	GO:0019001	guanyl nucleotide binding	Molecular Function	23	P49411,P68104,F8VP99,B4E190,P68371,P61026,X1WI22,P18085,E9PLA2,B7ZAY2,Q6FIG4,F5H018,A0A024R2Z6,Q8N4P8,Q8IXJ3,P13639,B4DPI9,Q9Y5M8,P62330,P23258,A0A384N647,C9IZ01,Q14692
6	GO:0030554	adenyl nucleotide binding	Molecular Function	99	Q8TAA5,Q0QEN7,P35580,P35579,Q7Z406,M0QY43,Q08211,B4DNF8,P16615,Q5S4N1,Q9P134,P25705,J3QRN6,B7Z597,P12956,Q9NR30,B4DY09,H0YIC2,B4DXW1,P54886,P38919,B3KVA7,E9PDF6,Q9BSD7,C9J7S3,I3L2G1,B5BUB1,P14618,A4FS09,B4DN41,K7EPJ3,Q562R1,P49916,B4DFQ8,P12277,B7Z2F4,A0A087WVM4,B3KX11,B7Z3E5,D3DTH7,B4E0S6,Q8N254,B4DDF5,H7BXY3,Q53HB9,F8VQ14,H0Y2W2,B4DYP6,P17987,P61160,P11388,B3KRK2,P13010,A0A1X7SBZ2,U3KQ50,Q9H9J7…
6	GO:0032550	purine ribonucleoside binding	Molecular Function	23	P49411,P68104,F8VP99,B4E190,P68371,P61026,X1WI22,P18085,E9PLA2,B7ZAY2,Q6FIG4,F5H018,A0A024R2Z6,Q8N4P8,Q8IXJ3,P13639,B4DPI9,Q9Y5M8,P62330,P23258,A0A384N647,C9IZ01,Q14692
6	GO:0016597	amino acid binding	Molecular Function	2	Q5JTZ9,Q53SY7
6	GO:0005525	GTP binding	Molecular Function	23	P49411,P68104,F8VP99,B4E190,P68371,P61026,X1WI22,P18085,E9PLA2,B7ZAY2,Q6FIG4,F5H018,A0A024R2Z6,Q8N4P8,Q8IXJ3,P13639,B4DPI9,Q9Y5M8,P62330,P23258,A0A384N647,C9IZ01,Q14692
6	GO:0000287	magnesium ion binding	Molecular Function	5	P06733,Q13584,P14618,P11388,P24941
6	GO:0005509	calcium ion binding	Molecular Function	17	P16615,P19105,G8JLA2,O43707,P08590,P12814,Q9BRL5,P14649,Q96C19,E5RK82,P63316,P31151,Q86YZ3,O14958,A0A087WYV5,P11021,Q68DY8
6	GO:0031420	alkali metal ion binding	Molecular Function	1	P14618
6	GO:0046914	transition metal ion binding	Molecular Function	13	H9E7B8,P09874,A0A0B4J1Z1,P42677,P49916,P31151,B3KVL5,M0R2I3,D6REM6,H0YAG8,Q5JTZ9,Q59EC6,Q86YZ3
6	GO:1990446	U1 snRNP binding	Molecular Function	2	P62318,P62314
6	GO:0001069	regulatory region RNA binding	Molecular Function	1	Q08211
6	GO:0044212	transcription regulatory region DNA binding	Molecular Function	12	P09874,O43707,O75367,P06733,Q9P0M6,Q08211,P38159,P17096,Q5U071,A0A386NC25,P12956,P13010
6	GO:0000217	DNA secondary structure binding	Molecular Function	1	Q5U071
6	GO:0003684	damaged DNA binding	Molecular Function	5	P23396,P12956,P16104,P13010,B4DEB2
6	GO:0003689	DNA clamp loader activity	Molecular Function	1	P35251
6	GO:0003690	double-stranded DNA binding	Molecular Function	17	O75367,P09874,O43707,P06733,Q9P0M6,Q08211,P38159,P17096,Q5U071,B1AHA9,P23396,P12956,P16403,P13010,Q92522,P78527,P35251
6	GO:0003697	single-stranded DNA binding	Molecular Function	4	P22626,Q15365,Q04837,Q08211
6	GO:0008301	DNA binding, bending	Molecular Function	2	Q5U071,P11388
6	GO:0043565	sequence-specific DNA binding	Molecular Function	15	O75367,P09874,O43707,P06733,Q9P0M6,Q08211,P38159,P17096,Q5U071,B1AHA9,P12956,P13010,P22626,Q15365,P35251
6	GO:0045027	DNA end binding	Molecular Function	1	P13010
6	GO:0045142	triplex DNA binding	Molecular Function	1	Q08211
6	GO:0061860	DNA clamp unloader activity	Molecular Function	1	P35251
6	GO:0000049	tRNA binding	Molecular Function	5	P68104,Q7L0Y3,Q5JTZ9,Q08J23,A8K5W7
6	GO:0003725	double-stranded RNA binding	Molecular Function	8	Q08211,P68371,P12814,Q9NR30,Q12906,Q15717,Q9Y623,Q00610
6	GO:0003727	single-stranded RNA binding	Molecular Function	4	P38919,Q08211,Q12906,P38159
6	GO:0003729	mRNA binding	Molecular Function	20	P22626,Q9NZI8,Q15717,Q9Y6M1,O00425,Q5VU21,P38919,Q12906,Q13151,P35580,Q08211,P23396,P18124,P38159,P42766,Q9Y5S9,Q15365,O75533,A0A0F7L0Q8,Q59GC1
6	GO:0017069	snRNA binding	Molecular Function	5	Q9NW64,Q6P2Q9,P55769,P62318,Q9NR30
6	GO:0008135	translation factor activity, RNA binding	Molecular Function	9	A6NJH9,P49411,P68104,I3L397,C9JG32,P13639,P26641,A4D1M6,C9IZ01
6	GO:0017091	AU-rich element binding	Molecular Function	3	Q12906,Q15717,Q13151
6	GO:0019843	rRNA binding	Molecular Function	13	A0A2R8Y6J3,Q15050,P13639,P30050,P23396,P32969,P62750,Q9NV31,P62269,P62280,Q9NR30,A8K800,Q9H9Y2
6	GO:0030515	snoRNA binding	Molecular Function	7	P55769,O43818,Q14692,Q9NY12,Q9NV31,Q9Y2X3,Q9NR30
6	GO:0035613	RNA stem-loop binding	Molecular Function	3	P35580,Q08211,P38919
6	GO:0036002	pre-mRNA binding	Molecular Function	3	P22626,Q6P2Q9,Q9NW64
6	GO:0061980	regulatory RNA binding	Molecular Function	4	Q08211,P22626,Q9NR30,Q15717
6	GO:0070034	telomerase RNA binding	Molecular Function	2	P62318,Q9NY12
6	GO:0071208	histone pre-mRNA DCP binding	Molecular Function	1	P62318
6	GO:1990247	N6-methyladenosine-containing RNA binding	Molecular Function	1	P22626
6	GO:0032559	adenyl ribonucleotide binding	Molecular Function	98	Q0QEN7,P35580,P35579,Q7Z406,M0QY43,Q08211,B4DNF8,P16615,Q5S4N1,Q9P134,P25705,J3QRN6,B7Z597,P12956,Q9NR30,B4DY09,H0YIC2,B4DXW1,P54886,P38919,B3KVA7,E9PDF6,Q9BSD7,C9J7S3,I3L2G1,B5BUB1,P14618,A4FS09,B4DN41,K7EPJ3,Q562R1,P49916,B4DFQ8,P12277,B7Z2F4,A0A087WVM4,B3KX11,B7Z3E5,D3DTH7,B4E0S6,Q8N254,B4DDF5,H7BXY3,Q53HB9,F8VQ14,H0Y2W2,B4DYP6,P17987,P61160,P11388,B3KRK2,P13010,A0A1X7SBZ2,U3KQ50,Q9H9J7,A0A0A0…
6	GO:0032561	guanyl ribonucleotide binding	Molecular Function	23	P49411,P68104,F8VP99,B4E190,P68371,P61026,X1WI22,P18085,E9PLA2,B7ZAY2,Q6FIG4,F5H018,A0A024R2Z6,Q8N4P8,Q8IXJ3,P13639,B4DPI9,Q9Y5M8,P62330,P23258,A0A384N647,C9IZ01,Q14692
6	GO:0004866	endopeptidase inhibitor activity	Molecular Function	3	A0A3S8NFS6,P04406,P30048
6	GO:0004860	protein kinase inhibitor activity	Molecular Function	1	O75367
6	GO:0004864	protein phosphatase inhibitor activity	Molecular Function	1	Q96SB3
6	GO:0000774	adenyl-nucleotide exchange factor activity	Molecular Function	1	Q8TAA5
7	GO:0004450	isocitrate dehydrogenase (NADP+) activity	Molecular Function	1	Q13584
7	GO:0004365	glyceraldehyde-3-phosphate dehydrogenase (NAD+) (phosphorylating) activity	Molecular Function	1	P04406
7	GO:0009383	rRNA (cytosine-C5-)-methyltransferase activity	Molecular Function	1	P46087
7	GO:0008650	rRNA (uridine-2'-O-)-methyltransferase activity	Molecular Function	1	Q8IY81
7	GO:0008080	N-acetyltransferase activity	Molecular Function	2	Q9H0A0,Q05CW7
7	GO:0004579	dolichyl-diphosphooligosaccharide-protein glycotransferase activity	Molecular Function	1	Q96HX3
7	GO:0008184	glycogen phosphorylase activity	Molecular Function	1	E9PK47
7	GO:0004017	adenylate kinase activity	Molecular Function	1	A0A384N647
7	GO:0034450	ubiquitin-ubiquitin ligase activity	Molecular Function	1	Q9UMS4
7	GO:0004222	metalloendopeptidase activity	Molecular Function	1	A0A087WVZ4
7	GO:0004298	threonine-type endopeptidase activity	Molecular Function	1	H0YLS6
7	GO:0098519	nucleotide phosphatase activity, acting on free nucleotides	Molecular Function	1	Q9BSD7
7	GO:0017111	nucleoside-triphosphatase activity	Molecular Function	64	P35580,P35579,Q7Z406,P11055,Q9Y623,P49411,P68104,P68371,P61026,P18085,E9PLA2,B7ZAY2,Q6FIG4,F5H018,Q8IXJ3,P13639,P62330,P23258,C9IZ01,Q14692,Q08211,P12956,A4FS09,B4DDF5,P13010,Q8NHX6,P35251,Q9NR30,P38919,Q8N254,P11021,M0QY43,J3QRN6,P14649,E9PDF6,B7Z3E5,D3DTH7,A0A0A0MRM8,Q59FF5,A0A2U3TZL8,A0A384P5W4,P11388,E9PCY5,Q0QEN7,P25705,H7C086,B4DL14,Q5S4N1,B4DN41,B4E0S6,H7BXY3,B4DYP6,B3KRK2,A0A1X7SBZ2,B3KM6…
7	GO:0047429	nucleoside-triphosphate diphosphatase activity	Molecular Function	1	Q08211
7	GO:1990518	single-stranded DNA-dependent ATP-dependent 3'-5' DNA helicase activity	Molecular Function	1	Q08211
7	GO:0009019	tRNA (guanine-N1-)-methyltransferase activity	Molecular Function	1	Q7L0Y3
7	GO:0016429	tRNA (adenine-N1-)-methyltransferase activity	Molecular Function	1	Q7L0Y3
7	GO:0016428	tRNA (cytosine-5-)-methyltransferase activity	Molecular Function	1	Q08J23
7	GO:0008308	voltage-gated anion channel activity	Molecular Function	1	Q5JSD2
7	GO:0015662	ATPase activity, coupled to transmembrane movement of ions, phosphorylative mechanism	Molecular Function	1	P16615
7	GO:0044769	ATPase activity, coupled to transmembrane movement of ions, rotational mechanism	Molecular Function	4	Q0QEN7,P25705,H7C086,B4DL14
7	GO:0046933	proton-transporting ATP synthase activity, rotational mechanism	Molecular Function	4	Q0QEN7,P25705,H7C086,B4DL14
7	GO:0005388	calcium-transporting ATPase activity	Molecular Function	1	P16615
7	GO:0036442	proton-exporting ATPase activity	Molecular Function	1	P16615
7	GO:0015085	calcium ion transmembrane transporter activity	Molecular Function	1	P16615
7	GO:0015078	proton transmembrane transporter activity	Molecular Function	6	Q0QEN7,P25705,H7C086,B4DL14,H9E7B8,P16615
7	GO:0000295	adenine nucleotide transmembrane transporter activity	Molecular Function	2	P05141,P12236
7	GO:0022832	voltage-gated channel activity	Molecular Function	1	Q5JSD2
7	GO:0042626	ATPase activity, coupled to transmembrane movement of substances	Molecular Function	5	Q0QEN7,P25705,H7C086,B4DL14,P16615
7	GO:0030331	estrogen receptor binding	Molecular Function	2	P09874,Q9NV06
7	GO:0050681	androgen receptor binding	Molecular Function	1	O94906
7	GO:0046965	retinoid X receptor binding	Molecular Function	1	P17096
7	GO:0031749	D2 dopamine receptor binding	Molecular Function	1	Q96SB3
7	GO:0032038	myosin II heavy chain binding	Molecular Function	1	P08590
7	GO:0005080	protein kinase C binding	Molecular Function	1	P11388
7	GO:0043422	protein kinase B binding	Molecular Function	1	Q13243
7	GO:0008157	protein phosphatase 1 binding	Molecular Function	1	Q96SB3
7	GO:0030955	potassium ion binding	Molecular Function	1	P14618
7	GO:0005507	copper ion binding	Molecular Function	1	H9E7B8
7	GO:0008270	zinc ion binding	Molecular Function	11	P09874,A0A0B4J1Z1,P42677,P49916,P31151,B3KVL5,M0R2I3,D6REM6,H0YAG8,Q5JTZ9,Q59EC6
7	GO:0000976	transcription regulatory region sequence-specific DNA binding	Molecular Function	9	P09874,O43707,O75367,P06733,Q9P0M6,Q08211,P38159,P17096,Q5U071
7	GO:0001012	RNA polymerase II regulatory region DNA binding	Molecular Function	7	P09874,O43707,O75367,P06733,Q9P0M6,Q08211,P38159
7	GO:0001047	core promoter binding	Molecular Function	1	O75367
7	GO:0035326	enhancer binding	Molecular Function	2	P17096,Q5U071
7	GO:0000400	four-way junction DNA binding	Molecular Function	1	Q5U071
7	GO:0032356	oxidized DNA binding	Molecular Function	1	P23396
7	GO:0010385	double-stranded methylated DNA binding	Molecular Function	1	O75367
7	GO:0097100	supercoiled DNA binding	Molecular Function	2	P23396,Q5U071
7	GO:1990837	sequence-specific double-stranded DNA binding	Molecular Function	10	O75367,P09874,O43707,P06733,Q9P0M6,Q08211,P38159,P17096,Q5U071,B1AHA9
7	GO:0098847	sequence-specific single stranded DNA binding	Molecular Function	2	P22626,Q15365
7	GO:0044378	non-sequence-specific DNA binding, bending	Molecular Function	1	Q5U071
7	GO:0042162	telomeric DNA binding	Molecular Function	3	P22626,P12956,P13010
7	GO:0070717	poly-purine tract binding	Molecular Function	1	P38919
7	GO:0003730	mRNA 3'-UTR binding	Molecular Function	8	Q12906,Q15717,Q13151,P22626,Q9NZI8,Q9Y6M1,O00425,Q5VU21
7	GO:0035368	selenocysteine insertion sequence binding	Molecular Function	1	P38919
7	GO:0048027	mRNA 5'-UTR binding	Molecular Function	4	P35580,Q9NZI8,Q9Y6M1,O00425
7	GO:1990825	sequence-specific mRNA binding	Molecular Function	1	Q08211
7	GO:0017070	U6 snRNA binding	Molecular Function	2	Q9NW64,Q6P2Q9
7	GO:0030619	U1 snRNA binding	Molecular Function	1	Q6P2Q9
7	GO:0030620	U2 snRNA binding	Molecular Function	1	Q6P2Q9
7	GO:0030621	U4 snRNA binding	Molecular Function	1	P55769
7	GO:0030622	U4atac snRNA binding	Molecular Function	1	P55769
7	GO:0030623	U5 snRNA binding	Molecular Function	1	Q6P2Q9
7	GO:0071209	U7 snRNA binding	Molecular Function	1	P62318
7	GO:0097322	7SK snRNA binding	Molecular Function	1	Q9NR30
7	GO:0003743	translation initiation factor activity	Molecular Function	1	A6NJH9
7	GO:0003746	translation elongation factor activity	Molecular Function	8	P49411,P68104,I3L397,C9JG32,P13639,P26641,A4D1M6,C9IZ01
7	GO:0035925	mRNA 3'-UTR AU-rich region binding	Molecular Function	3	Q12906,Q15717,Q13151
7	GO:0008097	5S rRNA binding	Molecular Function	3	A0A2R8Y6J3,Q15050,P13639
7	GO:0070180	large ribosomal subunit rRNA binding	Molecular Function	1	P30050
7	GO:0070181	small ribosomal subunit rRNA binding	Molecular Function	1	P23396
7	GO:0034511	U3 snoRNA binding	Molecular Function	3	P55769,O43818,Q14692
7	GO:0034512	box C/D snoRNA binding	Molecular Function	1	P55769
7	GO:0034513	box H/ACA snoRNA binding	Molecular Function	1	Q9NY12
7	GO:0097157	pre-mRNA intronic binding	Molecular Function	2	P22626,Q6P2Q9
7	GO:0035197	siRNA binding	Molecular Function	1	Q08211
7	GO:0035198	miRNA binding	Molecular Function	3	P22626,Q9NR30,Q15717
7	GO:0004867	serine-type endopeptidase inhibitor activity	Molecular Function	1	A0A3S8NFS6
7	GO:0004869	cysteine-type endopeptidase inhibitor activity	Molecular Function	1	P30048
7	GO:0019828	aspartic-type endopeptidase inhibitor activity	Molecular Function	1	P04406
7	GO:0030291	protein serine/threonine kinase inhibitor activity	Molecular Function	1	O75367
8	GO:1990883	rRNA cytidine N-acetyltransferase activity	Molecular Function	1	Q9H0A0
8	GO:0003924	GTPase activity	Molecular Function	15	P49411,P68104,P68371,P61026,P18085,E9PLA2,B7ZAY2,Q6FIG4,F5H018,Q8IXJ3,P13639,P62330,P23258,C9IZ01,Q14692
8	GO:0003774	motor activity	Molecular Function	15	P35580,P35579,Q7Z406,P11055,Q9Y623,A0A2U3TZL8,A0A384P5W4,M0QY43,J3QRN6,P14649,E9PDF6,B7Z3E5,D3DTH7,A0A0A0MRM8,Q59FF5
8	GO:0004386	helicase activity	Molecular Function	20	Q08211,P12956,A4FS09,B4DDF5,P13010,Q8NHX6,Q9NR30,P38919,Q8N254,B5BUB1,M0R0Y3,Q5S4N1,B4DN41,B4E0S6,H7BXY3,B4DYP6,B3KRK2,A0A1X7SBZ2,B3KM65,Q6ZMY0
8	GO:0016887	ATPase activity	Molecular Function	19	P35251,P11055,P11021,P11388,E9PCY5,Q0QEN7,P25705,H7C086,B4DL14,P16615,P35580,P35579,Q7Z406,Q08211,I3L2G1,B4DZC0,Q9Y623,D6R9I9,E7ESD9
8	GO:0052905	tRNA (guanine(9)-N(1))-methyltransferase activity	Molecular Function	1	Q7L0Y3
8	GO:0008553	proton-exporting ATPase activity, phosphorylative mechanism	Molecular Function	1	P16615
8	GO:0086039	calcium-transporting ATPase activity involved in regulation of cardiac muscle cell membrane potential	Molecular Function	1	P16615
8	GO:0000977	RNA polymerase II regulatory region sequence-specific DNA binding	Molecular Function	7	Q08211,P38159,O75367,P09874,O43707,P06733,Q9P0M6
8	GO:0000987	proximal promoter sequence-specific DNA binding	Molecular Function	2	Q08211,P38159
8	GO:0001046	core promoter sequence-specific DNA binding	Molecular Function	1	O75367
8	GO:0001158	enhancer sequence-specific DNA binding	Molecular Function	2	P17096,Q5U071
8	GO:0032357	oxidized purine DNA binding	Molecular Function	1	P23396
8	GO:0032358	oxidized pyrimidine DNA binding	Molecular Function	1	P23396
8	GO:0000182	rDNA binding	Molecular Function	1	O75367
8	GO:0003680	AT DNA binding	Molecular Function	1	P17096
8	GO:0003688	DNA replication origin binding	Molecular Function	2	Q08211,B1AHA9
8	GO:0043047	single-stranded telomeric DNA binding	Molecular Function	1	P22626
8	GO:0008143	poly(A) binding	Molecular Function	1	P38919
9	GO:0000146	microfilament motor activity	Molecular Function	5	P35580,P35579,Q7Z406,P11055,Q9Y623
9	GO:0003777	microtubule motor activity	Molecular Function	2	A0A2U3TZL8,A0A384P5W4
9	GO:0070035	purine NTP-dependent helicase activity	Molecular Function	1	Q08211
9	GO:0042623	ATPase activity, coupled	Molecular Function	14	P35251,P11388,E9PCY5,Q0QEN7,P25705,H7C086,B4DL14,P16615,P35580,P35579,Q7Z406,Q08211,P11055,P11021
9	GO:0000978	RNA polymerase II proximal promoter sequence-specific DNA binding	Molecular Function	2	Q08211,P38159
9	GO:0000979	RNA polymerase II core promoter sequence-specific DNA binding	Molecular Function	1	O75367
9	GO:0098505	G-rich strand telomeric DNA binding	Molecular Function	1	P22626
10	GO:0008026	ATP-dependent helicase activity	Molecular Function	1	Q08211
10	GO:0008094	DNA-dependent ATPase activity	Molecular Function	4	P35251,P11388,E9PCY5,Q08211
10	GO:0030898	actin-dependent ATPase activity	Molecular Function	3	P35580,P35579,Q7Z406
10	GO:0043492	ATPase activity, coupled to movement of substances	Molecular Function	5	Q0QEN7,P25705,H7C086,B4DL14,P16615
11	GO:0033170	protein-DNA loading ATPase activity	Molecular Function	1	P35251
11	GO:0043142	single-stranded DNA-dependent ATPase activity	Molecular Function	1	Q08211

## Sheet: CC
Level	GO_ID	Term	Type	Seqs_Num	Sequences
1	GO:0005575	cellular_component	Cellular Component	374	P35579,P22626,P09874,Q7Z406,P49411,P04406,P68104,Q08211,P16615,P05387,P32969,P08708,P23396,P30050,P05141,Q9Y2X3,P25705,P60866,P62269,P62280,P12956,P18124,Q9NR30,P36578,P06733,Q12906,P38159,Q02878,Q9Y3U8,P18085,Q86V81,P38919,P55795,Q9BSD7,P62424,B7ZAY2,P42766,P26373,Q15717,P62753,P25398,Q15365,P13639,P61160,Q9UMS4,P50402,P13010,Q0QF12,Q9BSE8,O60884,P26641,Q9Y5M8,P62330,P78527,F5GY37,P11021,Q9H0A0,…
2	GO:0016020	membrane	Cellular Component	112	P35579,P04406,P68104,P23396,P25705,P12814,P61026,Q16643,P06733,E9PDF6,P83881,P13639,P13010,E9PMI6,G3V3B0,P62330,P11021,P09496,A0A0U1RQF0,O14654,O75369,Q68DY8,Q96SB3,Q00610,P16615,Q9Y5M8,Q96HX3,Q86YZ3,O14958,Q9UNX4,P50402,C9JW69,Q8NAV1,C9JXK0,Q92621,P35580,O14578,Q96GA3,Q9H444,P05141,P12236,P54886,O15235,A8K787,P82921,Q9NWU5,Q96EL2,Q96A35,H9E7B8,Q96HS1,Q5JSD2,P18085,O15144,Q96C19,B4DXN3,Q9NSS8,B4D…
2	GO:0005576	extracellular region	Cellular Component	66	P68104,O43707,P12814,P06733,P38159,Q562R1,P12277,C5J0G2,Q5U071,P31151,P63104,Q9Y3A2,A0A3S8NFS6,P02774,P14618,Q86YZ3,P35580,P35579,P22626,Q7Z406,P49411,Q04837,P04406,P19105,P05387,P23396,P62750,Q96KK5,P30050,P68371,P25705,P60866,P62269,P62280,O75367,P61026,P36578,P16104,P18085,P14649,Q86V81,Q9P0M6,P62851,P49207,O15144,P10599,Q15365,P13639,Q9H444,P17987,P61160,O15143,O60884,P26641,P62330,P11055,P11…
2	GO:0005623	cell	Cellular Component	356	P06733,P35579,P04406,P68104,P23396,P25705,P12814,P61026,Q16643,E9PDF6,P83881,P13639,P13010,E9PMI6,G3V3B0,P62330,P11021,P09496,A0A0U1RQF0,O14654,O75369,Q68DY8,Q96SB3,Q00610,O00422,P45973,Q9NZ48,Q9UPN1,E5RI99,P05387,P32969,P62750,P63173,P30050,J3QQQ9,P18124,P36578,Q02878,Q9Y3U8,P62424,P42766,Q8IWR8,P26373,Q6DKI1,P49207,P08708,P60866,P42677,P62269,P62280,P62851,P62753,P25398,O75367,P16104,Q15050,Q9B…
2	GO:0009295	nucleoid	Cellular Component	4	P49411,Q04837,P05141,Q7L0Y3
2	GO:0030054	cell junction	Cellular Component	32	O43707,P12814,P35579,P61026,A0A024R1X8,Q16643,Q96SB3,P16615,P05387,P32969,P08708,P23396,P63173,P30050,P62269,P62280,P18124,P36578,Q02878,P62424,P17096,O15144,P31151,P63104,P61160,O15143,P62330,P11021,O75369,Q00610,Q9NV06,A6NP16
2	GO:0031974	membrane-enclosed lumen	Cellular Component	172	P68104,P12956,P14618,P13639,P13010,Q04837,P13804,P23396,P25705,P38117,P11177,A8K651,P30048,Q7L0Y3,A0A384N647,P11021,P61160,Q8TAA5,O14958,P68371,P31151,Q86YZ3,P02774,O43707,P12814,O15235,B4DRH6,P49411,P05141,O75367,P22626,P09874,Q08211,P16615,P08708,A0A087X0X3,Q9NV31,P62318,Q9Y2X3,F8W6I7,P55769,Q9NZI8,O75531,P60866,P42677,P62269,E9PCY7,P62280,Q9NR30,P16104,Q12906,P38159,P62314,D6RFX4,Q86V81,Q9P0M6…
2	GO:0032991	protein-containing complex	Cellular Component	229	Q86V81,P45973,P23258,Q9UMS4,Q9NW64,P17987,P22626,P04406,Q08211,P23396,O43707,Q9NZI8,P18124,P36578,Q12906,P38159,P55795,Q15717,P62753,P13639,P11388,Q13595,P13010,Q13151,P98179,Q92621,P35251,P09874,P12956,P17096,P24941,P78527,G3V1N2,Q5XTR9,P68104,A4D1M6,P63316,Q7Z554,B4DXW1,F8WDD7,B2R4D5,O15144,P61160,O15143,A0A1W2PNV4,B1AK87,A8K0T9,C9JUG7,P35580,M0QY43,P19105,J3QRN6,P14649,E9PDF6,B7Z3E5,D3DTH7,A0A…
2	GO:0043226	organelle	Cellular Component	330	P61026,P14618,P23258,P04406,P25398,Q13595,P11021,I3L1L3,Q00610,P63104,Q9H444,P68371,P23396,P63173,P30050,P42677,P62269,P18124,Q16643,Q02878,P55795,P62851,P61160,Q96SB3,P09874,P49411,Q04837,P13804,P05141,P25705,Q9NR30,Q12906,P38117,P12236,P54886,P11177,Q13584,Q96HS1,P49916,M0QYT0,A0A087WVM4,H0YG82,H0YMU3,H7BXY3,H0Y2W2,Q8N1B9,F8VVM2,P30048,S4R3W9,Q7L0Y3,Q9NWU5,B4DU83,Q5T3Q7,Q96A35,Q5JSD2,C9J7P5,Q8T…
2	GO:0044215	other organism	Cellular Component	2	Q92621,P11388
2	GO:0044217	other organism part	Cellular Component	2	Q92621,P11388
2	GO:0044421	extracellular region part	Cellular Component	61	P68104,O43707,P12814,P06733,P38159,Q562R1,P12277,C5J0G2,Q5U071,P31151,P63104,Q9Y3A2,A0A3S8NFS6,P02774,P14618,Q86YZ3,P68371,Q00610,P35580,P35579,P22626,Q7Z406,P49411,Q04837,P04406,P19105,P05387,P23396,P62750,Q96KK5,P30050,P25705,P60866,P62269,P62280,O75367,P61026,P36578,P16104,P18085,P14649,Q86V81,Q9P0M6,P62851,P49207,O15144,P10599,Q15365,P13639,Q9H444,P17987,P61160,O15143,O60884,P26641,P62330,P11…
2	GO:0044422	organelle part	Cellular Component	244	O15235,P16615,P04406,Q9UNX4,P50402,C9JW69,Q8NAV1,C9JXK0,Q92621,P23258,P08590,P14649,P11055,Q9Y623,P63316,Q7Z554,O43707,P12814,O14958,O75369,P06733,P61026,P23396,P05141,P25705,P12236,P54886,A8K787,P82921,Q9NWU5,Q96EL2,Q96A35,H9E7B8,Q96HS1,Q5JSD2,P09874,O75531,Q9H444,P45973,P68104,P12956,P14618,P13639,P13010,O14578,Q04837,P13804,P38117,P11177,A8K651,P30048,Q7L0Y3,A0A384N647,P11021,P61160,E5RI99,P05…
2	GO:0044425	membrane part	Cellular Component	44	P50402,P16615,P61026,Q9Y5M8,P11021,Q96HX3,H9E7B8,O14958,Q9NSS8,P12236,Q96HS1,A8K787,B4DT61,U3KQP3,F8VVM2,B4DRW5,B4DZY9,O75369,Q68DY8,E9PCX7,P35579,Q9H444,B4DXN3,Q5HYM2,Q96GA3,P09496,Q00610,P25705,P05141,Q96SB3,P68104,P23396,P18085,Q0QEN7,B4DL14,Q8TAA5,A0A024R1X8,P35580,P62330,O14578,Q96C19,P13639,O15144,Q16643
2	GO:0044456	synapse part	Cellular Component	21	P61026,P09496,Q96SB3,Q562R1,P62330,Q15717,Q16643,P38919,P35580,Q9NZI8,P18085,P23396,P63173,P30050,P42677,P62269,P18124,Q02878,P55795,P62851,P61160
2	GO:0044464	cell part	Cellular Component	355	P35579,P04406,P68104,P23396,P25705,P12814,P61026,Q16643,P06733,E9PDF6,P83881,P13639,P13010,E9PMI6,G3V3B0,P62330,P11021,P09496,A0A0U1RQF0,O14654,O75369,Q68DY8,Q96SB3,Q00610,P35580,Q9H444,Q9H0A0,O14578,Q5HYM2,P23258,P62753,P17987,Q15717,Q86YZ3,Q9NZ48,Q9UPN1,Q7Z406,Q9NZI8,P16615,P38919,P12277,Q9Y5S9,P24941,Q9NSM5,P22626,Q08211,P62750,B1AK87,O43707,P68371,O75531,A0A386NC25,B7Z597,P62280,P18124,P36578…
2	GO:0045202	synapse	Cellular Component	29	P35580,P35579,P16615,P12814,Q16643,P18085,P38919,Q15717,Q562R1,O15144,P63104,P62330,P23396,P63173,P30050,P42677,P62269,P18124,Q02878,P55795,P62851,P61160,Q96SB3,P61026,P09496,Q9NZI8,P49411,P08708,P13639
2	GO:0099080	supramolecular complex	Cellular Component	21	A0A0D9SFE5,P68371,P17987,P50402,P23258,A0A2U3TZL8,Q562R1,Q9Y623,B4DJT7,Q9Y5M8,Q00610,P08590,P11055,P14649,P63316,Q7Z554,O43707,P12814,O14958,O75369,P06733
3	GO:0005886	plasma membrane	Cellular Component	33	Q86YZ3,P35579,P16615,P05141,Q9H444,A0A024R1X8,P09496,Q00610,P62330,P35580,O14578,P68104,P23396,P18085,Q96SB3,O15144,Q16643,P04406,P25705,P12814,P61026,P06733,E9PDF6,P83881,P13639,P13010,E9PMI6,G3V3B0,P11021,A0A0U1RQF0,O14654,O75369,Q68DY8
3	GO:0005789	endoplasmic reticulum membrane	Cellular Component	6	P16615,O14958,P11021,P61026,Q9Y5M8,Q96HX3
3	GO:0019867	outer membrane	Cellular Component	3	P50402,Q96HS1,Q5JSD2
3	GO:0031090	organelle membrane	Cellular Component	32	P16615,P04406,Q9UNX4,P50402,C9JW69,Q8NAV1,C9JXK0,Q92621,P61026,P23396,P05141,P25705,P12236,P54886,O15235,A8K787,P82921,Q9NWU5,Q96EL2,Q96A35,H9E7B8,Q96HS1,Q5JSD2,O14958,P09496,Q00610,P62330,Q96GA3,Q9H444,P68104,B4DXN3,Q8TAA5
3	GO:0042175	nuclear outer membrane-endoplasmic reticulum membrane network	Cellular Component	7	P50402,P16615,P61026,Q9Y5M8,P11021,Q96HX3,O14958
3	GO:0048475	coated membrane	Cellular Component	3	Q9H444,P09496,Q00610
3	GO:0098589	membrane region	Cellular Component	3	P05141,Q96C19,P13639
3	GO:0098590	plasma membrane region	Cellular Component	11	P35580,P35579,P62330,O14578,P68104,P23396,P18085,Q96SB3,O15144,Q16643,P09496
3	GO:0098805	whole membrane	Cellular Component	14	P61026,P62330,Q96GA3,Q9H444,P09496,Q00610,P50402,Q96HS1,Q5JSD2,P68104,B4DXN3,P05141,Q96C19,P13639
3	GO:0042645	mitochondrial nucleoid	Cellular Component	4	P49411,Q04837,P05141,Q7L0Y3
3	GO:0005911	cell-cell junction	Cellular Component	7	P35579,P61026,A0A024R1X8,Q16643,P12814,P16615,O43707
3	GO:0030055	cell-substrate junction	Cellular Component	26	P35579,P05387,P32969,P08708,P23396,O43707,P63173,P30050,P62269,P62280,P12814,P18124,P61026,P36578,Q02878,P62424,P17096,O15144,P31151,P63104,P61160,O15143,P62330,P11021,O75369,Q00610
3	GO:0070161	anchoring junction	Cellular Component	29	Q96SB3,P35579,P61026,A0A024R1X8,P12814,P05387,P32969,P08708,P23396,O43707,P63173,P30050,P62269,P62280,P18124,P36578,Q02878,P62424,P17096,O15144,P31151,P63104,P61160,O15143,P62330,P11021,O75369,Q00610,P16615
3	GO:0043233	organelle lumen	Cellular Component	172	Q04837,P13804,P23396,P25705,P38117,P11177,A8K651,P30048,Q7L0Y3,A0A384N647,P11021,P68104,P12956,P14618,P13639,P61160,Q8TAA5,P68371,P31151,Q86YZ3,P02774,O14958,P13010,O43707,P12814,O15235,B4DRH6,P49411,P05141,O75367,P22626,P09874,Q08211,P16615,P08708,A0A087X0X3,Q9NV31,P62318,Q9Y2X3,F8W6I7,P55769,Q9NZI8,O75531,P60866,P42677,P62269,E9PCY7,P62280,Q9NR30,P16104,Q12906,P38159,P62314,D6RFX4,Q86V81,Q9P0M6…
3	GO:0000346	transcription export complex	Cellular Component	1	Q86V81
3	GO:0000776	kinetochore	Cellular Component	1	P45973
3	GO:0000930	gamma-tubulin complex	Cellular Component	1	P23258
3	GO:0000974	Prp19 complex	Cellular Component	2	Q9UMS4,Q9NW64
3	GO:0002102	podosome	Cellular Component	1	P61160
3	GO:0002199	zona pellucida receptor complex	Cellular Component	1	P17987
3	GO:1990904	ribonucleoprotein complex	Cellular Component	138	P62318,K7EJB5,P62314,P62306,A8K4Z4,A0A248RGE3,Q6FG99,K7EJT5,S4R456,P32969,Q5JR95,C9JYQ9,Q9BTQ7,Q8NI62,Q76N57,P08708,P23396,Q96IR1,F8W7C6,I3L3P7,D6RG13,A0A2R8Y811,A0A2R8Y849,G3V203,Q9BQQ5,A0PJ62,B3KS36,E9PQD7,P42677,P62269,J3KMX5,H0YLP6,P62280,M0R3D6,M0R210,A0A2R8Y623,D3YTB1,E7EX53,F8WBS5,P62851,P83881,B2R4V2,G3V1A1,G5E9R3,E4W6B6,A0A2R8Y6J3,Q5VVC8,B8ZZK4,Q53G19,Q8NBL6,S4R3W9,P22626,P38159,P31942,Q…
3	GO:0005643	nuclear pore	Cellular Component	1	Q92621
3	GO:0005663	DNA replication factor C complex	Cellular Component	1	P35251
3	GO:0005667	transcription factor complex	Cellular Component	5	P17096,P09874,P12956,P24941,P78527
3	GO:0005833	hemoglobin complex	Cellular Component	2	G3V1N2,Q5XTR9
3	GO:0005839	proteasome core complex	Cellular Component	1	H0YLS6
3	GO:0005853	eukaryotic translation elongation factor 1 complex	Cellular Component	2	P68104,A4D1M6
3	GO:0005861	troponin complex	Cellular Component	2	P63316,Q7Z554
3	GO:0005885	Arp2/3 protein complex	Cellular Component	7	B4DXW1,F8WDD7,B2R4D5,O15144,P61160,O15143,A0A1W2PNV4
3	GO:0008023	transcription elongation factor complex	Cellular Component	2	Q9Y5B9,Q08945
3	GO:0008290	F-actin capping protein complex	Cellular Component	3	B1AK87,A8K0T9,C9JUG7
3	GO:0009330	DNA topoisomerase complex (ATP-hydrolyzing)	Cellular Component	1	P11388
3	GO:0016459	myosin complex	Cellular Component	15	P35580,P35579,Q7Z406,P14649,P11055,Q9Y623,P08590,M0QY43,P19105,J3QRN6,E9PDF6,B7Z3E5,D3DTH7,A0A0A0MRM8,Q59FF5
3	GO:0017053	transcriptional repressor complex	Cellular Component	1	P45973
3	GO:0019035	viral integration complex	Cellular Component	1	P11388
3	GO:0019773	proteasome core complex, alpha-subunit complex	Cellular Component	1	H0YLS6
3	GO:0030314	junctional membrane complex	Cellular Component	1	O14958
3	GO:0030870	Mre11 complex	Cellular Component	1	E7ESD9
3	GO:0032797	SMN complex	Cellular Component	1	I3L2C7
3	GO:0032993	protein-DNA complex	Cellular Component	13	Q96KK5,K7EMV3,O75367,P16104,C9J0D1,Q5TEC6,P16403,Q9P0M6,Q92522,P12956,P13010,P09874,P78527
3	GO:0034388	Pwp2p-containing subcomplex of 90S preribosome	Cellular Component	2	Q9UNX4,A0A0B4J2E5
3	GO:0034455	t-UTP complex	Cellular Component	1	Q9H8H0
3	GO:0034457	Mpp10 complex	Cellular Component	2	Q9NV31,U3KQ48
3	GO:0034663	endoplasmic reticulum chaperone complex	Cellular Component	1	P11021
3	GO:0035145	exon-exon junction complex	Cellular Component	3	P38919,P61326,Q9Y5S9
3	GO:0036125	fatty acid beta-oxidation multienzyme complex	Cellular Component	1	B4DRH6
3	GO:0036284	tubulobulbar complex	Cellular Component	1	O15143
3	GO:0036452	ESCRT complex	Cellular Component	2	Q9H444,B4DXN3
3	GO:0042555	MCM complex	Cellular Component	4	A4FS09,B4DDF5,B1AHA9,Q8NHX6
3	GO:0043564	Ku70:Ku80 complex	Cellular Component	2	P12956,P13010
3	GO:0044815	DNA packaging complex	Cellular Component	9	Q96KK5,K7EMV3,O75367,P16104,C9J0D1,Q5TEC6,P16403,Q9P0M6,Q92522
3	GO:0061574	ASAP complex	Cellular Component	1	O00422
3	GO:0070421	DNA ligase III-XRCC1 complex	Cellular Component	1	P49916
3	GO:0070545	PeBoW complex	Cellular Component	1	Q9GZL7
3	GO:0070937	CRD-mediated mRNA stability complex	Cellular Component	2	Q08211,Q9NZI8
3	GO:0071159	NF-kappaB complex	Cellular Component	1	P23396
3	GO:0071817	MMXD complex	Cellular Component	1	P05141
3	GO:0089701	U2AF	Cellular Component	1	B5BU08
3	GO:0097255	R2TP complex	Cellular Component	2	B5BUB1,M0R0Y3
3	GO:0097452	GAIT complex	Cellular Component	1	P04406
3	GO:0098796	membrane protein complex	Cellular Component	14	Q9H444,B4DXN3,Q5HYM2,Q96GA3,P09496,Q00610,P25705,Q0QEN7,B4DL14,A0A024R1X8,Q8TAA5,P12236,O14958,P16615
3	GO:0098798	mitochondrial protein complex	Cellular Component	10	O15235,Q9NWU5,Q96A35,P82921,Q96EL2,B4DRH6,Q7L0Y3,Q8TAA5,P12236,P25705
3	GO:0101031	chaperone complex	Cellular Component	3	F8VQ14,P17987,Q15185
3	GO:0120114	Sm-like protein family complex	Cellular Component	9	P62318,K7EJB5,P62314,P62306,E9PMI6,Q6P2Q9,O94906,O75533,P55769
3	GO:1902494	catalytic complex	Cellular Component	37	P06733,O00422,P45973,Q9NY12,P22626,P62318,P38159,P62314,Q86V81,P38919,P61326,Q9Y5S9,P62306,Q9UMS4,O75533,Q9NW64,Q6P2Q9,O94906,B5BUB1,M0R0Y3,P35251,Q9Y4W2,P11177,Q9NV06,Q9NZ48,Q9UPN1,Q96SB3,E9PMI6,P14618,B4DZC0,P16615,Q7L0Y3,Q08211,Q9NSM5,P24928,P24941,H0YLS6
3	GO:1990351	transporter complex	Cellular Component	2	O14958,P16615
3	GO:1990391	DNA repair complex	Cellular Component	3	P12956,P13010,P78527
3	GO:0005929	cilium	Cellular Component	3	P23258,P61026,P14618
3	GO:0043227	membrane-bounded organelle	Cellular Component	257	P04406,P25398,Q13595,P11021,I3L1L3,Q00610,P14618,P63104,Q9H444,P09874,P49411,Q04837,P13804,P05141,P25705,Q9NR30,Q12906,P38117,P12236,P54886,P11177,Q13584,Q96HS1,P49916,M0QYT0,A0A087WVM4,H0YG82,H0YMU3,H7BXY3,H0Y2W2,Q8N1B9,F8VVM2,P30048,S4R3W9,Q7L0Y3,Q9NWU5,B4DU83,Q5T3Q7,Q96A35,Q5JSD2,C9J7P5,Q8TAA5,Q9BSH4,Q5JTZ9,A0A1B0GV49,P35580,P35579,P22626,P68104,Q08211,P32969,P23396,P62750,Q9NV31,O43707,P62318…
3	GO:0043228	non-membrane-bounded organelle	Cellular Component	223	P45973,A8K4Z4,A0A248RGE3,Q6FG99,K7EJT5,S4R456,P32969,Q5JR95,C9JYQ9,Q9BTQ7,Q8NI62,Q76N57,P08708,P23396,Q96IR1,F8W7C6,I3L3P7,D6RG13,A0A2R8Y811,A0A2R8Y849,G3V203,Q9BQQ5,A0PJ62,B3KS36,E9PQD7,P42677,P62269,J3KMX5,H0YLP6,P62280,M0R3D6,M0R210,A0A2R8Y623,D3YTB1,E7EX53,F8WBS5,P62851,P83881,B2R4V2,G3V1A1,G5E9R3,E4W6B6,A0A2R8Y6J3,Q5VVC8,B8ZZK4,Q53G19,Q8NBL6,S4R3W9,Q9Y5B9,Q15397,B5MCF9,B9EG90,B0AZQ4,P09874,P…
3	GO:0043229	intracellular organelle	Cellular Component	328	P04406,P25398,Q13595,P11021,I3L1L3,Q00610,P09874,P49411,Q04837,P13804,P05141,P25705,Q9NR30,Q12906,P38117,P12236,P54886,P11177,Q13584,Q96HS1,P14618,P49916,M0QYT0,A0A087WVM4,H0YG82,H0YMU3,H7BXY3,H0Y2W2,Q8N1B9,P63104,F8VVM2,P30048,S4R3W9,Q7L0Y3,Q9NWU5,B4DU83,Q5T3Q7,Q96A35,Q5JSD2,C9J7P5,Q8TAA5,Q9BSH4,Q5JTZ9,A0A1B0GV49,P35580,P35579,P22626,P68104,Q08211,P32969,P23396,P62750,Q9NV31,O43707,P62318,K7EMV3…
3	GO:0043230	extracellular organelle	Cellular Component	56	P68371,P14618,Q00610,P35580,P35579,P22626,Q7Z406,P49411,Q04837,P04406,P68104,P19105,P05387,P23396,P62750,O43707,Q96KK5,P30050,P25705,P60866,P62269,P62280,O75367,P12814,P61026,P36578,P16104,P06733,P38159,P18085,P14649,Q86V81,Q9P0M6,P62851,Q562R1,P49207,P12277,O15144,P10599,Q15365,P13639,P63104,Q9H444,P17987,P61160,Q86YZ3,O15143,O60884,P26641,P62330,P11055,P11021,Q5T749,O75369,P35251,P02774
3	GO:0099572	postsynaptic specialization	Cellular Component	12	P23396,P63173,P30050,P42677,P62269,P18124,Q16643,Q02878,P55795,P62851,P61160,Q96SB3
3	GO:0018995	host	Cellular Component	2	Q92621,P11388
3	GO:0044216	other organism cell	Cellular Component	2	Q92621,P11388
3	GO:0005615	extracellular space	Cellular Component	61	P35580,P35579,P22626,Q7Z406,P49411,Q04837,P04406,P68104,P19105,P05387,P23396,P62750,O43707,Q96KK5,P30050,P68371,P25705,P60866,P62269,P62280,O75367,P12814,P61026,P36578,P16104,P06733,P38159,P18085,P14649,Q86V81,Q9P0M6,P14618,P62851,Q562R1,P49207,P12277,O15144,P10599,Q15365,P13639,P63104,Q9H444,P17987,P61160,Q86YZ3,O15143,O60884,P26641,P62330,P11055,P11021,Q5T749,O75369,P35251,P02774,Q00610,C5J0G2,…
3	GO:0031012	extracellular matrix	Cellular Component	3	P14618,P31151,Q86YZ3
3	GO:0072562	blood microparticle	Cellular Component	2	P63104,P02774
3	GO:0000313	organellar ribosome	Cellular Component	5	O15235,Q9NWU5,Q96A35,P82921,Q96EL2
3	GO:0044441	ciliary part	Cellular Component	1	P23258
3	GO:0044446	intracellular organelle part	Cellular Component	243	P09874,O75531,Q9H444,P50402,P45973,Q92621,P30050,A0A087WXM6,Q0VGL3,Q1JQ76,Q9NWU5,P62269,D6RD47,M0R0F0,C9J9K3,P62851,P62753,A6NL93,Q15061,Q96KK5,K7EMV3,O75367,P16104,C9J0D1,Q5TEC6,P16403,Q9P0M6,Q92522,P35251,P13010,Q86V81,P62318,K7EJB5,P62314,P62306,P22626,Q08211,P16615,P08708,P23396,A0A087X0X3,Q9NV31,Q9Y2X3,F8W6I7,P55769,Q9NZI8,P60866,P42677,E9PCY7,P62280,P12956,Q9NR30,Q12906,P38159,D6RFX4,P38919…
3	GO:0044449	contractile fiber part	Cellular Component	11	P08590,P14649,P11055,Q9Y623,P63316,Q7Z554,O43707,P12814,O14958,O75369,P06733
3	GO:0019898	extrinsic component of membrane	Cellular Component	2	P16615,A0A024R1X8
3	GO:0005640	nuclear outer membrane	Cellular Component	1	P50402
3	GO:0005905	clathrin-coated pit	Cellular Component	2	P09496,Q00610
3	GO:0031224	intrinsic component of membrane	Cellular Component	20	Q9NSS8,P12236,Q96HS1,A8K787,B4DT61,U3KQP3,F8VVM2,P50402,B4DRW5,B4DZY9,Q9Y5M8,H9E7B8,O75369,Q96HX3,Q68DY8,E9PCX7,P16615,P05141,P11021,O14958
3	GO:0044455	mitochondrial membrane part	Cellular Component	3	Q8TAA5,P12236,P25705
3	GO:0044459	plasma membrane part	Cellular Component	16	P35579,Q9H444,Q96SB3,P16615,P05141,P68104,P23396,P18085,P35580,P62330,O14578,A0A024R1X8,P09496,Q00610,O15144,Q16643
3	GO:0070469	respiratory chain	Cellular Component	1	H9E7B8
3	GO:0098552	side of membrane	Cellular Component	4	Q9H444,P68104,Q96SB3,P16615
3	GO:0008021	synaptic vesicle	Cellular Component	2	P09496,P61026
3	GO:0030672	synaptic vesicle membrane	Cellular Component	1	P09496
3	GO:0044326	dendritic spine neck	Cellular Component	1	Q96SB3
3	GO:0044327	dendritic spine head	Cellular Component	1	Q96SB3
3	GO:0097060	synaptic membrane	Cellular Component	3	Q16643,P09496,Q96SB3
3	GO:0098793	presynapse	Cellular Component	4	P61026,P09496,Q562R1,P62330
3	GO:0098794	postsynapse	Cellular Component	18	P35580,Q9NZI8,P18085,Q16643,P38919,Q96SB3,P23396,P63173,P30050,P42677,P62269,P18124,Q02878,P55795,P62851,P61160,P09496,Q15717
3	GO:0098833	presynaptic endocytic zone	Cellular Component	1	P09496
3	GO:0098843	postsynaptic endocytic zone	Cellular Component	1	P09496
3	GO:0099524	postsynaptic cytosol	Cellular Component	2	Q16643,P38919
3	GO:0099631	postsynaptic endocytic zone cytoplasmic component	Cellular Component	1	P09496
3	GO:1990780	cytoplasmic side of dendritic spine plasma membrane	Cellular Component	1	Q96SB3
3	GO:0005622	intracellular	Cellular Component	353	P06733,O00422,P45973,P61026,Q9NZ48,Q9UPN1,Q96SB3,E5RI99,P05387,P32969,P62750,P63173,P30050,J3QQQ9,P18124,P36578,Q02878,Q9Y3U8,P62424,P42766,P83881,Q8IWR8,P26373,Q6DKI1,P49207,P08708,P23396,P60866,P42677,P62269,P62280,P62851,P62753,P25398,O75367,P16104,Q15050,Q9BYG3,P23258,O75531,P11388,P24941,P17987,P62318,P62314,Q86V81,Q9NSM5,P22626,Q15185,P12956,P13010,P09874,Q9P0M6,Q9NY12,P78527,Q9H0A0,A6NL93,…
3	GO:0008287	protein serine/threonine phosphatase complex	Cellular Component	3	Q9NZ48,Q9UPN1,Q96SB3
3	GO:0009986	cell surface	Cellular Component	2	P06733,P11021
3	GO:0012505	endomembrane system	Cellular Component	59	P09874,O75531,Q9H444,P50402,P45973,Q92621,P61026,O15144,P62330,P24941,Q00610,P16615,Q5JR95,P23396,C9JXB8,F8W7C6,D6RG13,G3V203,D6RD47,P83881,P26373,P62753,P49207,Q15050,P31151,Q8TED0,Q15397,P11021,P18085,P25398,P17987,A0A0U1RQF0,P30048,P23258,P36578,Q02878,O14958,P04406,Q9UNX4,C9JW69,Q8NAV1,C9JXK0,Q96GA3,P68104,P12956,P14618,P13639,P13010,P09496,Q5HYM2,O43707,P12814,Q9Y5M8,Q96HX3,P68371,P61160,Q86…
3	GO:0030427	site of polarized growth	Cellular Component	5	P35580,Q7Z406,Q9NZI8,Q16643,Q96SB3
3	GO:0030496	midbody	Cellular Component	6	P62330,P35580,Q9H444,P11021,Q9H0A0,O14578
3	GO:0030904	retromer complex	Cellular Component	1	Q5HYM2
3	GO:0030906	retromer, cargo-selective complex	Cellular Component	1	Q5HYM2
3	GO:0031252	cell leading edge	Cellular Component	13	P35579,P12814,P62330,P35580,Q9NZI8,Q16643,O15144,P61160,Q96SB3,P68104,P23396,P18085,P23258
3	GO:0031254	cell trailing edge	Cellular Component	1	P35579
3	GO:0031975	envelope	Cellular Component	26	P09874,O75531,Q9H444,P50402,P45973,Q92621,P04406,Q9UNX4,C9JW69,Q8NAV1,C9JXK0,Q96HS1,Q5JSD2,P23396,P05141,P25705,P12236,P54886,O15235,A8K787,P82921,Q9NWU5,Q96EL2,Q96A35,H9E7B8,Q8TAA5
3	GO:0032153	cell division site	Cellular Component	4	P35579,P35580,P62330,O14578
3	GO:0032155	cell division site part	Cellular Component	4	P35579,P35580,P62330,O14578
3	GO:0042995	cell projection	Cellular Component	24	P16615,P35579,P12814,P62330,P61026,P14618,O43707,O15144,O75369,P35580,Q9NZI8,Q16643,P61160,Q96SB3,P23258,P38919,P62753,P12277,Q9Y5S9,P98179,P18085,P68104,P23396,Q7Z406
3	GO:0044297	cell body	Cellular Component	9	P35580,P38919,P12277,Q9Y5S9,O75369,Q96SB3,O14578,P62753,P17987
3	GO:0044424	intracellular part	Cellular Component	353	Q9NZ48,P24941,Q9NSM5,P35580,P35579,P22626,P04406,P68104,Q08211,P23396,P62750,B1AK87,O43707,P68371,Q9NZI8,O75531,A0A386NC25,B7Z597,P62280,P12814,P18124,Q16643,P36578,P06733,Q12906,Q9Y3U8,P18085,P38919,P61326,C9J7S3,P62424,P14618,Q15717,Q562R1,P49916,B2R4D5,Q15185,B7Z2F4,B3KX11,Q5U071,Q9Y5S9,P31151,Q15365,P13639,P63104,Q9H444,P30048,P61160,P11388,Q86YZ3,Q9UMS4,Q9BYG3,H0YLS6,A8K7D9,P50402,U3KQ50,Q9H…
3	GO:0044463	cell projection part	Cellular Component	16	Q16643,P38919,P62753,P12277,Q9Y5S9,P98179,Q96SB3,P35580,Q9NZI8,P18085,P62330,P68104,P23396,O15144,Q7Z406,P23258
3	GO:0045177	apical part of cell	Cellular Component	1	P23258
3	GO:0070938	contractile ring	Cellular Component	1	P35579
3	GO:0071944	cell periphery	Cellular Component	35	P35579,P04406,P68104,P23396,P25705,P12814,P61026,Q16643,P06733,E9PDF6,P83881,P13639,P13010,E9PMI6,G3V3B0,P62330,P11021,P09496,A0A0U1RQF0,O14654,O75369,Q68DY8,Q96SB3,Q00610,P35580,Q86YZ3,P16615,P05141,Q9H444,A0A024R1X8,O14578,P18085,O15144,P61160,O43707
3	GO:0090543	Flemming body	Cellular Component	1	P62330
3	GO:0097223	sperm part	Cellular Component	1	P17987
3	GO:0097458	neuron part	Cellular Component	29	P61026,P23396,P63173,P30050,P42677,P62269,P18124,Q16643,Q02878,P55795,P62851,P61160,Q96SB3,O43707,O15144,O75369,P09496,P35580,P38919,P12277,Q9Y5S9,O14578,Q562R1,P62330,P62753,P98179,Q7Z406,Q9NZI8,P18085
3	GO:0098862	cluster of actin-based cell projections	Cellular Component	6	P35580,P35579,Q7Z406,O43707,P12814,O75369
3	GO:1990204	oxidoreductase complex	Cellular Component	1	P11177
3	GO:0031594	neuromuscular junction	Cellular Component	2	P35580,P35579
3	GO:0097470	ribbon synapse	Cellular Component	1	P16615
3	GO:0098978	glutamatergic synapse	Cellular Component	10	P35580,P12814,Q16643,P18085,P38919,Q15717,Q562R1,O15144,P63104,P62330
3	GO:0098984	neuron to neuron synapse	Cellular Component	13	P63104,P23396,P63173,P30050,P42677,P62269,P18124,Q16643,Q02878,P55795,P62851,P61160,Q96SB3
3	GO:0099081	supramolecular polymer	Cellular Component	21	Q9Y623,A0A0D9SFE5,P68371,P17987,P50402,P23258,A0A2U3TZL8,Q562R1,Q9Y5M8,B4DJT7,Q00610,P08590,P11055,P14649,P63316,Q7Z554,O43707,P12814,O14958,O75369,P06733
4	GO:0001533	cornified envelope	Cellular Component	1	Q86YZ3
4	GO:0031227	intrinsic component of endoplasmic reticulum membrane	Cellular Component	1	P11021
4	GO:0033017	sarcoplasmic reticulum membrane	Cellular Component	2	O14958,P16615
4	GO:0031968	organelle outer membrane	Cellular Component	3	P50402,Q96HS1,Q5JSD2
4	GO:0012506	vesicle membrane	Cellular Component	4	P61026,P09496,Q00610,P16615
4	GO:0019866	organelle inner membrane	Cellular Component	14	P50402,P23396,P05141,P25705,P12236,P54886,O15235,A8K787,P82921,Q9NWU5,Q96EL2,Q96A35,H9E7B8,Q8TAA5
4	GO:0031965	nuclear membrane	Cellular Component	7	P50402,P04406,Q9UNX4,C9JW69,Q8NAV1,C9JXK0,Q92621
4	GO:0031966	mitochondrial membrane	Cellular Component	15	Q96HS1,Q5JSD2,P23396,P05141,P25705,P12236,P54886,O15235,A8K787,P82921,Q9NWU5,Q96EL2,Q96A35,H9E7B8,Q8TAA5
4	GO:0098588	bounding membrane of organelle	Cellular Component	13	P61026,P16615,O14958,P09496,Q00610,P62330,Q96GA3,Q9H444,P50402,Q96HS1,Q5JSD2,P68104,B4DXN3
4	GO:0030117	membrane coat	Cellular Component	3	P09496,Q00610,Q9H444
4	GO:0098857	membrane microdomain	Cellular Component	3	P05141,Q96C19,P13639
4	GO:0031253	cell projection membrane	Cellular Component	6	P62330,P68104,P23396,P18085,Q96SB3,O15144
4	GO:0032154	cleavage furrow	Cellular Component	4	P35580,P35579,P62330,O14578
4	GO:0005774	vacuolar membrane	Cellular Component	4	Q96GA3,P09496,Q00610,P68104
4	GO:0030658	transport vesicle membrane	Cellular Component	2	P09496,Q00610
4	GO:0030667	secretory granule membrane	Cellular Component	1	P61026
4	GO:0010008	endosome membrane	Cellular Component	7	Q9H444,B4DXN3,P62330,Q96GA3,P09496,Q00610,P61026
4	GO:0030660	Golgi-associated vesicle membrane	Cellular Component	2	P09496,Q00610
4	GO:0030662	coated vesicle membrane	Cellular Component	2	Q00610,P09496
4	GO:0030666	endocytic vesicle membrane	Cellular Component	2	Q00610,P61026
4	GO:0005913	cell-cell adherens junction	Cellular Component	5	P12814,P16615,P35579,P61026,A0A024R1X8
4	GO:0005921	gap junction	Cellular Component	1	Q16643
4	GO:0044291	cell-cell contact zone	Cellular Component	1	P12814
4	GO:0005924	cell-substrate adherens junction	Cellular Component	26	P35579,P05387,P32969,P08708,P23396,O43707,P63173,P30050,P62269,P62280,P12814,P18124,P61026,P36578,Q02878,P62424,P17096,O15144,P31151,P63104,P61160,O15143,P62330,P11021,O75369,Q00610
4	GO:0005912	adherens junction	Cellular Component	29	P35579,P61026,A0A024R1X8,P12814,P16615,P05387,P32969,P08708,P23396,O43707,P63173,P30050,P62269,P62280,P18124,P36578,Q02878,P62424,P17096,O15144,P31151,P63104,P61160,O15143,P62330,P11021,O75369,Q00610,Q96SB3
4	GO:0031983	vesicle lumen	Cellular Component	11	P68104,P12956,P14618,P13639,P13010,O43707,P12814,P68371,P31151,P61160,Q86YZ3
4	GO:0070013	intracellular organelle lumen	Cellular Component	172	Q04837,P13804,P23396,P25705,P38117,P11177,A8K651,P30048,Q7L0Y3,A0A384N647,P11021,P68104,P12956,P14618,P13639,P61160,Q8TAA5,P68371,P31151,Q86YZ3,P02774,O14958,P13010,O43707,P12814,O15235,B4DRH6,P49411,P05141,O75367,P22626,P09874,Q08211,P16615,P08708,A0A087X0X3,Q9NV31,P62318,Q9Y2X3,F8W6I7,P55769,Q9NZI8,O75531,P60866,P42677,P62269,E9PCY7,P62280,Q9NR30,P16104,Q12906,P38159,P62314,D6RFX4,Q86V81,Q9P0M6…
4	GO:0061825	podosome core	Cellular Component	1	P61160
4	GO:0030532	small nuclear ribonucleoprotein complex	Cellular Component	8	P62318,P62306,P62314,Q6P2Q9,O94906,O75533,P55769,K7EJB5
4	GO:0005840	ribosome	Cellular Component	79	P26373,Q08211,P63173,Q02878,Q9Y3U8,P62424,P83881,P13639,O15235,Q9NWU5,Q96A35,P82921,Q96EL2,E5RI99,P05387,P32969,P62750,P30050,J3QQQ9,P18124,P36578,P42766,Q8IWR8,Q6DKI1,P49207,P08708,P23396,P60866,P42677,P62269,P62280,P62851,P62753,P25398,A0A087WXM6,Q0VGL3,Q1JQ76,D6RD47,M0R0F0,C9J9K3,A8K4Z4,A0A248RGE3,Q6FG99,K7EJT5,S4R456,Q5JR95,C9JYQ9,Q9BTQ7,Q8NI62,Q76N57,Q96IR1,F8W7C6,I3L3P7,D6RG13,A0A2R8Y811,A0…
4	GO:0005681	spliceosomal complex	Cellular Component	19	P62318,P62314,P62306,O75533,P38159,Q8NAV1,P22626,Q86V81,P38919,P61326,Q9Y5S9,Q9UMS4,Q9NW64,Q6P2Q9,O94906,P55769,P31942,Q13595,P98179
4	GO:0005697	telomerase holoenzyme complex	Cellular Component	4	Q9NY12,P62318,Q15185,Q9H0A0
4	GO:0005732	small nucleolar ribonucleoprotein complex	Cellular Component	6	Q9Y2X3,P55769,O43818,Q9NY12,P62306,U3KQ48
4	GO:0005844	polysome	Cellular Component	11	Q08211,P63173,Q02878,Q9Y3U8,P62424,P83881,P13639,P35580,P23396,P18124,P62753
4	GO:0030677	ribonuclease P complex	Cellular Component	1	Q7L0Y3
4	GO:0030684	preribosome	Cellular Component	23	Q14692,B4DEN9,Q15050,Q9GZL7,Q8IY81,B5MCF9,Q9H9Y2,Q9Y4W2,Q96GA3,Q9NV31,Q9Y2X3,P55769,Q66K47,Q9NV06,J3KNP2,Q9UNX4,Q9Y3A2,O43818,A0A0A0MTB8,Q96GC8,Q14690,A0A0B4J2E5,U3KQ48
4	GO:0031332	RNAi effector complex	Cellular Component	1	Q08211
4	GO:0035770	ribonucleoprotein granule	Cellular Component	7	Q08211,Q02878,P62753,Q15365,Q9NZI8,Q15717,Q08J23
4	GO:0044391	ribosomal subunit	Cellular Component	38	P30050,A0A087WXM6,Q0VGL3,Q1JQ76,Q9NWU5,P62269,D6RD47,M0R0F0,C9J9K3,P62851,P62753,E5RI99,P05387,P32969,P62750,P63173,J3QQQ9,P18124,P36578,Q02878,Q9Y3U8,P62424,P42766,P83881,Q8IWR8,P26373,Q6DKI1,P49207,P08708,P23396,P60866,P42677,P62280,P25398,O15235,P82921,Q96EL2,Q96A35
4	GO:0070761	pre-snoRNP complex	Cellular Component	1	Q9Y2X3
4	GO:0070992	translation initiation complex	Cellular Component	1	P63173
4	GO:0044798	nuclear transcription factor complex	Cellular Component	1	P17096
4	GO:1990584	cardiac Troponin complex	Cellular Component	1	P63316
4	GO:0035101	FACT complex	Cellular Component	2	Q9Y5B9,Q08945
4	GO:0016460	myosin II complex	Cellular Component	7	P08590,P14649,P11055,Q9Y623,P35580,P35579,Q7Z406
4	GO:0016461	unconventional myosin complex	Cellular Component	1	P14649
4	GO:0032982	myosin filament	Cellular Component	5	P35580,P35579,Q7Z406,P11055,Q9Y623
4	GO:0000782	telomere cap complex	Cellular Component	2	P12956,P13010
4	GO:0000786	nucleosome	Cellular Component	9	Q96KK5,K7EMV3,O75367,P16104,C9J0D1,Q5TEC6,P16403,Q9P0M6,Q92522
4	GO:0016507	mitochondrial fatty acid beta-oxidation multienzyme complex	Cellular Component	1	B4DRH6
4	GO:0000815	ESCRT III complex	Cellular Component	2	Q9H444,B4DXN3
4	GO:0016469	proton-transporting two-sector ATPase complex	Cellular Component	3	P25705,Q0QEN7,B4DL14
4	GO:0033178	proton-transporting two-sector ATPase complex, catalytic domain	Cellular Component	3	Q0QEN7,P25705,B4DL14
4	GO:0034448	EGO complex	Cellular Component	1	Q96GA3
4	GO:0071439	clathrin complex	Cellular Component	2	P09496,Q00610
4	GO:0098797	plasma membrane protein complex	Cellular Component	3	A0A024R1X8,P09496,Q00610
4	GO:0098800	inner mitochondrial membrane protein complex	Cellular Component	3	Q8TAA5,P12236,P25705
4	GO:1902495	transmembrane transporter complex	Cellular Component	2	O14958,P16615
4	GO:0005761	mitochondrial ribosome	Cellular Component	5	Q9NWU5,Q96A35,O15235,P82921,Q96EL2
4	GO:0005762	mitochondrial large ribosomal subunit	Cellular Component	2	Q9NWU5,Q96A35
4	GO:0005763	mitochondrial small ribosomal subunit	Cellular Component	3	O15235,P82921,Q96EL2
4	GO:0030678	mitochondrial ribonuclease P complex	Cellular Component	1	Q7L0Y3
4	GO:0005832	chaperonin-containing T-complex	Cellular Component	2	F8VQ14,P17987
4	GO:0034715	pICln-Sm protein complex	Cellular Component	4	P62318,P62314,P62306,E9PMI6
4	GO:0034719	SMN-Sm protein complex	Cellular Component	3	P62318,P62314,P62306
4	GO:0000015	phosphopyruvate hydratase complex	Cellular Component	1	P06733
4	GO:0000118	histone deacetylase complex	Cellular Component	2	O00422,P45973
4	GO:0031429	box H/ACA snoRNP complex	Cellular Component	1	Q9NY12
4	GO:0033202	DNA helicase complex	Cellular Component	2	B5BUB1,M0R0Y3
4	GO:0071012	catalytic step 1 spliceosome	Cellular Component	5	P38919,Q9Y5S9,Q9UMS4,Q9NW64,Q6P2Q9
4	GO:0071013	catalytic step 2 spliceosome	Cellular Component	14	P62318,P62314,P62306,Q9UMS4,Q9NW64,Q6P2Q9,P22626,P38159,Q86V81,P38919,P61326,Q9Y5S9,O75533,O94906
4	GO:0072589	box H/ACA scaRNP complex	Cellular Component	1	Q9NY12
4	GO:1903293	phosphatase complex	Cellular Component	3	Q9NZ48,Q9UPN1,Q96SB3
4	GO:1904949	ATPase complex	Cellular Component	5	P35251,B4DZC0,B5BUB1,M0R0Y3,P16615
4	GO:1905348	endonuclease complex	Cellular Component	3	Q08211,Q9Y4W2,Q7L0Y3
4	GO:1905354	exoribonuclease complex	Cellular Component	1	Q9Y4W2
4	GO:1905368	peptidase complex	Cellular Component	2	Q9NSM5,H0YLS6
4	GO:1990234	transferase complex	Cellular Component	12	P62318,P62314,P62306,E9PMI6,P45973,P14618,Q9NV06,Q9Y4W2,P24941,B5BUB1,M0R0Y3,P24928
4	GO:0070419	nonhomologous end joining complex	Cellular Component	3	P78527,P12956,P13010
4	GO:0097730	non-motile cilium	Cellular Component	1	P23258
4	GO:0043231	intracellular membrane-bounded organelle	Cellular Component	248	P09874,P49411,Q04837,P13804,P05141,P25705,Q9NR30,Q12906,P38117,P12236,P54886,P11177,Q13584,Q96HS1,P14618,P49916,M0QYT0,A0A087WVM4,H0YG82,H0YMU3,H7BXY3,H0Y2W2,Q8N1B9,P63104,F8VVM2,P30048,S4R3W9,Q7L0Y3,Q9NWU5,B4DU83,Q5T3Q7,Q96A35,P11021,Q5JSD2,C9J7P5,Q8TAA5,Q9BSH4,Q5JTZ9,A0A1B0GV49,P35580,P35579,P22626,P04406,P68104,Q08211,P32969,P23396,P62750,Q9NV31,O43707,P62318,K7EMV3,Q9Y2X3,P68371,P55769,O75531…
4	GO:0031967	organelle envelope	Cellular Component	26	P09874,O75531,Q9H444,P50402,P45973,Q92621,P04406,Q9UNX4,C9JW69,Q8NAV1,C9JXK0,P23396,P05141,P25705,P12236,P54886,O15235,A8K787,P82921,Q9NWU5,Q96EL2,Q96A35,H9E7B8,Q96HS1,Q5JSD2,Q8TAA5
4	GO:0031982	vesicle	Cellular Component	66	P16615,P68371,P14618,Q00610,P09496,P35580,P35579,P22626,Q7Z406,P49411,Q04837,P04406,P68104,P19105,P05387,P23396,P62750,O43707,Q96KK5,P30050,P25705,P60866,P62269,P62280,O75367,P12814,P61026,P36578,P16104,P06733,P38159,P18085,P14649,Q86V81,Q9P0M6,P62851,Q562R1,P49207,P12277,O15144,P10599,Q15365,P13639,P63104,Q9H444,P17987,P61160,Q86YZ3,O15143,O60884,P26641,P62330,P11055,P11021,Q5T749,O75369,P35251,…
4	GO:0031984	organelle subcompartment	Cellular Component	9	P61026,O14578,P09496,Q00610,P16615,Q9Y5M8,P11021,Q96HX3,O14958
4	GO:0043232	intracellular non-membrane-bounded organelle	Cellular Component	223	P45973,A8K4Z4,A0A248RGE3,Q6FG99,K7EJT5,S4R456,P32969,Q5JR95,C9JYQ9,Q9BTQ7,Q8NI62,Q76N57,P08708,P23396,Q96IR1,F8W7C6,I3L3P7,D6RG13,A0A2R8Y811,A0A2R8Y849,G3V203,Q9BQQ5,A0PJ62,B3KS36,E9PQD7,P42677,P62269,J3KMX5,H0YLP6,P62280,M0R3D6,M0R210,A0A2R8Y623,D3YTB1,E7EX53,F8WBS5,P62851,P83881,B2R4V2,G3V1A1,G5E9R3,E4W6B6,A0A2R8Y6J3,Q5VVC8,B8ZZK4,Q53G19,Q8NBL6,S4R3W9,Q9Y5B9,Q15397,B5MCF9,B9EG90,B0AZQ4,P09874,P…
4	GO:0097708	intracellular vesicle	Cellular Component	26	P09496,P61026,O15144,Q9H444,P62330,P24941,Q00610,P30048,P23258,O75369,P63104,P11021,P17987,Q96GA3,P68104,P12956,P14618,P13639,P13010,O43707,P12814,P68371,P31151,P61160,Q86YZ3,B4DXN3
4	GO:1903561	extracellular vesicle	Cellular Component	56	P35580,P35579,P22626,Q7Z406,P49411,Q04837,P04406,P68104,P19105,P05387,P23396,P62750,O43707,Q96KK5,P30050,P68371,P25705,P60866,P62269,P62280,O75367,P12814,P61026,P36578,P16104,P06733,P38159,P18085,P14649,Q86V81,Q9P0M6,P14618,P62851,Q562R1,P49207,P12277,O15144,P10599,Q15365,P13639,P63104,Q9H444,P17987,P61160,Q86YZ3,O15143,O60884,P26641,P62330,P11055,P11021,Q5T749,O75369,P35251,P02774,Q00610
4	GO:0014069	postsynaptic density	Cellular Component	12	P23396,P63173,P30050,P42677,P62269,P18124,Q16643,Q02878,P55795,P62851,P61160,Q96SB3
4	GO:0043657	host cell	Cellular Component	2	P11388,Q92621
4	GO:0070062	extracellular exosome	Cellular Component	56	P35580,P35579,P22626,Q7Z406,P49411,Q04837,P04406,P68104,P19105,P05387,P23396,P62750,O43707,Q96KK5,P30050,P68371,P25705,P60866,P62269,P62280,O75367,P12814,P61026,P36578,P16104,P06733,P38159,P18085,P14649,Q86V81,Q9P0M6,P14618,P62851,Q562R1,P49207,P12277,O15144,P10599,Q15365,P13639,P63104,Q9H444,P17987,P61160,Q86YZ3,O15143,O60884,P26641,P62330,P11055,P11021,Q5T749,O75369,P35251,P02774,Q00610
4	GO:0062023	collagen-containing extracellular matrix	Cellular Component	3	P14618,P31151,Q86YZ3
4	GO:0000314	organellar small ribosomal subunit	Cellular Component	3	O15235,P82921,Q96EL2
4	GO:0000315	organellar large ribosomal subunit	Cellular Component	2	Q9NWU5,Q96A35
4	GO:0036064	ciliary basal body	Cellular Component	1	P23258
4	GO:0044427	chromosomal part	Cellular Component	35	P45973,A6NL93,Q15061,Q96KK5,K7EMV3,O75367,P16104,C9J0D1,Q5TEC6,P16403,Q9P0M6,Q92522,P35251,P09874,P13010,P12956,Q5U071,Q08945,Q9NY12,P78527,Q9H0A0,Q08211,O15144,P61160,Q9UMS4,P22626,Q15185,P24941,S4R2Y4,P38159,P17987,P17096,B4DZC0,B5BUB1,M0R0Y3
4	GO:0044428	nuclear part	Cellular Component	152	O75367,Q86V81,P62318,K7EJB5,P62314,P62306,P09874,O75531,Q9H444,P50402,P45973,Q92621,P22626,Q08211,P16615,P08708,P23396,A0A087X0X3,Q9NV31,Q9Y2X3,F8W6I7,P55769,Q9NZI8,P60866,P42677,P62269,E9PCY7,P62280,P12956,Q9NR30,P16104,Q12906,P38159,D6RFX4,Q9P0M6,P38919,P55795,P11177,P61326,D6R9P3,Q5T6W2,Q9Y5B9,P62851,Q15717,P62753,P17096,P31942,O00422,B4DEN9,P49916,Q15185,P25398,Q13243,P10599,Q9Y5S9,Q15365,Q9N…
4	GO:0044429	mitochondrial part	Cellular Component	25	Q04837,P13804,P23396,P25705,P38117,P11177,A8K651,P30048,Q7L0Y3,A0A384N647,P49411,P05141,Q8TAA5,Q96HS1,Q5JSD2,P12236,P54886,O15235,A8K787,P82921,Q9NWU5,Q96EL2,Q96A35,H9E7B8,B4DRH6
4	GO:0044430	cytoskeletal part	Cellular Component	53	P35580,P35579,Q9UMS4,P50402,P23258,P09496,Q08J23,Q00610,P63316,Q7Z554,B4DXW1,F8WDD7,B2R4D5,O15144,P61160,O15143,A0A1W2PNV4,B1AK87,A8K0T9,C9JUG7,M0QY43,P19105,J3QRN6,P14649,E9PDF6,B7Z3E5,D3DTH7,A0A0A0MRM8,Q59FF5,P68104,Q16643,Q96SB3,Q7Z406,P05141,Q08211,P16104,E5RK82,Q9NV06,P17987,P24941,P23396,P11055,Q9Y623,O43707,P12814,O75369,A0A0D9SFE5,P68371,A0A2U3TZL8,Q562R1,B4DJT7,Q9Y5M8,P08590
4	GO:0044431	Golgi apparatus part	Cellular Component	4	P61026,P09496,Q00610,O14578
4	GO:0044432	endoplasmic reticulum part	Cellular Component	6	P11021,P16615,P61026,Q9Y5M8,Q96HX3,O14958
4	GO:0044433	cytoplasmic vesicle part	Cellular Component	18	P61026,P68104,P12956,P14618,P13639,P61160,P09496,Q96GA3,P13010,P62330,Q9H444,Q00610,O43707,P12814,P68371,P31151,Q86YZ3,B4DXN3
4	GO:0044437	vacuolar part	Cellular Component	9	Q96GA3,P68104,P68371,P31151,P61160,Q86YZ3,P02774,P09496,Q00610
4	GO:0005859	muscle myosin complex	Cellular Component	4	P08590,P14649,P11055,Q9Y623
4	GO:0030017	sarcomere	Cellular Component	10	P08590,P63316,Q7Z554,P06733,O43707,P12814,O14958,O75369,P11055,Q9Y623
4	GO:0030018	Z disc	Cellular Component	4	O43707,P12814,O14958,O75369
4	GO:0031430	M band	Cellular Component	1	P06733
4	GO:0031672	A band	Cellular Component	2	P06733,P08590
4	GO:0031674	I band	Cellular Component	5	O43707,P12814,O14958,O75369,P08590
4	GO:0036379	myofilament	Cellular Component	2	P63316,Q7Z554
4	GO:0019897	extrinsic component of plasma membrane	Cellular Component	2	A0A024R1X8,P16615
4	GO:0030132	clathrin coat of coated pit	Cellular Component	2	P09496,Q00610
4	GO:0016021	integral component of membrane	Cellular Component	20	P16615,P05141,P11021,O14958,Q9NSS8,P12236,Q96HS1,A8K787,B4DT61,U3KQP3,F8VVM2,P50402,B4DRW5,B4DZY9,Q9Y5M8,H9E7B8,O75369,Q96HX3,Q68DY8,E9PCX7
4	GO:0031226	intrinsic component of plasma membrane	Cellular Component	2	P16615,P05141
4	GO:0001772	immunological synapse	Cellular Component	1	P35579
4	GO:0009898	cytoplasmic side of plasma membrane	Cellular Component	3	P16615,Q96SB3,Q9H444
4	GO:0031256	leading edge membrane	Cellular Component	4	P68104,P23396,P18085,Q96SB3
4	GO:0098562	cytoplasmic side of membrane	Cellular Component	4	Q9H444,P68104,Q96SB3,P16615
4	GO:0032591	dendritic spine membrane	Cellular Component	1	Q96SB3
4	GO:0042734	presynaptic membrane	Cellular Component	1	P09496
4	GO:0045211	postsynaptic membrane	Cellular Component	1	Q16643
4	GO:0098835	presynaptic endocytic zone membrane	Cellular Component	1	P09496
4	GO:0043197	dendritic spine	Cellular Component	4	Q96SB3,P35580,Q9NZI8,P18085
4	GO:0000159	protein phosphatase type 2A complex	Cellular Component	1	Q9NZ48
4	GO:0000164	protein phosphatase type 1 complex	Cellular Component	2	Q9UPN1,Q96SB3
4	GO:0005635	nuclear envelope	Cellular Component	11	Q92621,P04406,Q9UNX4,P50402,C9JW69,Q8NAV1,C9JXK0,P09874,O75531,Q9H444,P45973
4	GO:0005768	endosome	Cellular Component	11	P30048,P61026,P23258,P62330,Q96GA3,Q9H444,P09496,Q00610,B4DXN3,O15144,P24941
4	GO:0005783	endoplasmic reticulum	Cellular Component	24	P11021,P36578,Q02878,P16615,O14958,P61026,Q9Y5M8,Q96HX3,Q5JR95,P23396,C9JXB8,F8W7C6,D6RG13,G3V203,D6RD47,P83881,P26373,P62753,P49207,Q15050,P31151,P50402,Q8TED0,Q15397
4	GO:0005794	Golgi apparatus	Cellular Component	9	P61026,P09496,Q00610,O14578,P18085,P25398,P17987,P62330,A0A0U1RQF0
4	GO:0030133	transport vesicle	Cellular Component	3	P61026,P09496,Q00610
4	GO:0030141	secretory granule	Cellular Component	13	P17987,P61026,P68104,P12956,P14618,P13639,P13010,O43707,P12814,P68371,P31151,P61160,Q86YZ3
4	GO:0030426	growth cone	Cellular Component	5	P35580,Q7Z406,Q9NZI8,Q16643,Q96SB3
4	GO:0001726	ruffle	Cellular Component	7	P68104,P23396,P18085,Q96SB3,P35579,P12814,P62330
4	GO:0030027	lamellipodium	Cellular Component	6	P35580,Q9NZI8,Q16643,O15144,P61160,Q96SB3
4	GO:0001931	uropod	Cellular Component	1	P35579
4	GO:0005826	actomyosin contractile ring	Cellular Component	1	P35579
4	GO:0120025	plasma membrane bounded cell projection	Cellular Component	24	P35579,P12814,P62330,P61026,P14618,O43707,O15144,O75369,P35580,Q9NZI8,Q16643,P61160,Q96SB3,P23258,P38919,P62753,P12277,Q9Y5S9,P98179,P18085,P68104,P23396,Q7Z406,P16615
4	GO:0043025	neuronal cell body	Cellular Component	7	P35580,P38919,P12277,Q9Y5S9,O75369,Q96SB3,O14578
4	GO:0000151	ubiquitin ligase complex	Cellular Component	1	Q9NV06
4	GO:0000307	cyclin-dependent protein kinase holoenzyme complex	Cellular Component	1	P24941
4	GO:0000502	proteasome complex	Cellular Component	2	H0YLS6,Q9NSM5
4	GO:0005737	cytoplasm	Cellular Component	248	P35580,P62330,O75369,P09496,P06733,P16615,O14958,P61026,Q9UPN1,Q96SB3,E5RI99,P05387,P32969,P62750,P63173,P30050,J3QQQ9,P18124,P36578,Q02878,Q9Y3U8,P62424,P42766,P83881,Q8IWR8,P26373,Q6DKI1,P49207,P08708,P23396,P60866,P42677,P62269,P62280,P62851,P62753,P25398,P17987,P23258,Q9H444,B4DXN3,Q8TAA5,Q00610,P09874,P49411,Q04837,P13804,P05141,P25705,Q9NR30,Q12906,P38117,P12236,P54886,P11177,Q13584,Q96HS1,…
4	GO:0016234	inclusion body	Cellular Component	1	P13639
4	GO:0030880	RNA polymerase complex	Cellular Component	1	P24928
4	GO:0031095	platelet dense tubular network membrane	Cellular Component	1	P16615
4	GO:0031234	extrinsic component of cytoplasmic side of plasma membrane	Cellular Component	1	P16615
4	GO:0031248	protein acetyltransferase complex	Cellular Component	2	B5BUB1,M0R0Y3
4	GO:0034708	methyltransferase complex	Cellular Component	6	P62318,P62314,P62306,E9PMI6,P45973,Q9Y4W2
4	GO:0044444	cytoplasmic part	Cellular Component	221	Q9UPN1,Q96SB3,P09874,P49411,Q04837,P13804,P05141,P25705,Q9NR30,Q12906,P38117,P12236,P54886,P11177,Q13584,Q96HS1,P14618,P49916,M0QYT0,A0A087WVM4,H0YG82,H0YMU3,H7BXY3,H0Y2W2,Q8N1B9,P63104,F8VVM2,P30048,S4R3W9,Q7L0Y3,Q9NWU5,B4DU83,Q5T3Q7,Q96A35,P11021,Q5JSD2,C9J7P5,Q8TAA5,Q9BSH4,Q5JTZ9,A0A1B0GV49,P35580,P35579,Q7Z406,P04406,P68104,Q08211,P19105,P05387,P32969,Q5JR95,P08708,P23396,P62750,C9JXB8,F8W7C6…
4	GO:0045259	proton-transporting ATP synthase complex	Cellular Component	3	P25705,Q0QEN7,B4DL14
4	GO:0045261	proton-transporting ATP synthase complex, catalytic core F(1)	Cellular Component	3	Q0QEN7,P25705,B4DL14
4	GO:0120038	plasma membrane bounded cell projection part	Cellular Component	16	Q16643,P38919,P62753,P12277,Q9Y5S9,P98179,Q96SB3,P35580,Q9NZI8,P18085,P62330,P68104,P23396,O15144,Q7Z406,P23258
4	GO:0005938	cell cortex	Cellular Component	11	P06733,P09496,P35579,P61160,O43707,Q16643,P68104,Q96SB3,P35580,P62330,O75369
4	GO:0001669	acrosomal vesicle	Cellular Component	1	P17987
4	GO:0043005	neuron projection	Cellular Component	14	Q16643,P38919,P62753,P12277,Q9Y5S9,P98179,Q96SB3,P35580,Q9NZI8,P18085,Q7Z406,O43707,O15144,O75369
4	GO:0032589	neuron projection membrane	Cellular Component	1	Q96SB3
4	GO:0033267	axon part	Cellular Component	5	P35580,Q7Z406,Q9NZI8,Q16643,Q96SB3
4	GO:0036477	somatodendritic compartment	Cellular Component	12	P35580,P38919,P12277,Q9Y5S9,O75369,Q96SB3,O14578,Q16643,P62753,P98179,Q9NZI8,P18085
4	GO:0005903	brush border	Cellular Component	6	P35580,P35579,Q7Z406,O43707,P12814,O75369
4	GO:0045254	pyruvate dehydrogenase complex	Cellular Component	1	P11177
4	GO:0032279	asymmetric synapse	Cellular Component	12	P23396,P63173,P30050,P42677,P62269,P18124,Q16643,Q02878,P55795,P62851,P61160,Q96SB3
4	GO:0098686	hippocampal mossy fiber to CA3 synapse	Cellular Component	1	P63104
4	GO:0099512	supramolecular fiber	Cellular Component	21	Q9Y623,A0A0D9SFE5,P68371,P17987,P50402,P23258,A0A2U3TZL8,Q562R1,B4DJT7,Q9Y5M8,Q00610,P08590,P11055,P14649,P63316,Q7Z554,O43707,P12814,O14958,O75369,P06733
5	GO:0030176	integral component of endoplasmic reticulum membrane	Cellular Component	1	P11021
5	GO:0014701	junctional sarcoplasmic reticulum membrane	Cellular Component	1	O14958
5	GO:0005741	mitochondrial outer membrane	Cellular Component	2	Q96HS1,Q5JSD2
5	GO:0030659	cytoplasmic vesicle membrane	Cellular Component	3	P61026,Q00610,P09496
5	GO:0005637	nuclear inner membrane	Cellular Component	1	P50402
5	GO:0005743	mitochondrial inner membrane	Cellular Component	13	Q8TAA5,P12236,P25705,P23396,P05141,P54886,O15235,A8K787,P82921,Q9NWU5,Q96EL2,Q96A35,H9E7B8
5	GO:0000139	Golgi membrane	Cellular Component	3	P09496,Q00610,P61026
5	GO:0030118	clathrin coat	Cellular Component	2	P09496,Q00610
5	GO:0030120	vesicle coat	Cellular Component	2	P09496,Q00610
5	GO:0045121	membrane raft	Cellular Component	3	P05141,Q96C19,P13639
5	GO:0031527	filopodium membrane	Cellular Component	1	P62330
5	GO:0032587	ruffle membrane	Cellular Component	4	P68104,P23396,P18085,Q96SB3
5	GO:0036195	muscle cell projection membrane	Cellular Component	1	O15144
5	GO:0098852	lytic vacuole membrane	Cellular Component	3	P09496,Q00610,P68104
5	GO:0012510	trans-Golgi network transport vesicle membrane	Cellular Component	2	P09496,Q00610
5	GO:0099501	exocytic vesicle membrane	Cellular Component	1	P09496
5	GO:0031901	early endosome membrane	Cellular Component	1	P62330
5	GO:0031902	late endosome membrane	Cellular Component	2	Q96GA3,Q9H444
5	GO:0036020	endolysosome membrane	Cellular Component	2	P09496,Q00610
5	GO:0055038	recycling endosome membrane	Cellular Component	2	P61026,P62330
5	GO:0030665	clathrin-coated vesicle membrane	Cellular Component	2	P09496,Q00610
5	GO:0030669	clathrin-coated endocytic vesicle membrane	Cellular Component	1	Q00610
5	GO:0030670	phagocytic vesicle membrane	Cellular Component	1	P61026
5	GO:0005916	fascia adherens	Cellular Component	1	P12814
5	GO:0061831	apical ectoplasmic specialization	Cellular Component	1	P16615
5	GO:0014704	intercalated disc	Cellular Component	1	P12814
5	GO:0005925	focal adhesion	Cellular Component	26	P35579,P05387,P32969,P08708,P23396,O43707,P63173,P30050,P62269,P62280,P12814,P18124,P61026,P36578,Q02878,P62424,P17096,O15144,P31151,P63104,P61160,O15143,P62330,P11021,O75369,Q00610
5	GO:0060205	cytoplasmic vesicle lumen	Cellular Component	11	P68104,P12956,P14618,P13639,P13010,O43707,P12814,P68371,P31151,P61160,Q86YZ3
5	GO:0005759	mitochondrial matrix	Cellular Component	19	Q8TAA5,O15235,B4DRH6,P49411,Q04837,P05141,Q7L0Y3,Q9NWU5,Q96A35,P82921,Q96EL2,P13804,P23396,P25705,P38117,P11177,A8K651,P30048,A0A384N647
5	GO:0005775	vacuolar lumen	Cellular Component	5	P68371,P31151,P61160,Q86YZ3,P02774
5	GO:0005788	endoplasmic reticulum lumen	Cellular Component	2	O14958,P11021
5	GO:0031981	nuclear lumen	Cellular Component	146	O75367,P22626,P09874,Q08211,P16615,P08708,P23396,A0A087X0X3,Q9NV31,P62318,Q9Y2X3,F8W6I7,P55769,Q9NZI8,O75531,P60866,P42677,P62269,E9PCY7,P62280,P12956,Q9NR30,P16104,Q12906,P38159,P62314,D6RFX4,Q86V81,Q9P0M6,P38919,P55795,P11177,P61326,D6R9P3,Q5T6W2,Q9Y5B9,P62851,Q15717,P62753,P17096,P31942,O00422,B4DEN9,P49916,Q15185,P25398,Q13243,P10599,Q9Y5S9,Q15365,Q9NV06,Q08945,Q96GA3,P63104,P62306,Q9GZL7,M0R…
5	GO:1904813	ficolin-1-rich granule lumen	Cellular Component	5	P68104,P12956,P14618,P13639,P61160
5	GO:0005683	U7 snRNP	Cellular Component	2	P62318,P62306
5	GO:0097525	spliceosomal snRNP complex	Cellular Component	7	P62318,P62314,Q6P2Q9,O94906,P62306,O75533,P55769
5	GO:0022626	cytosolic ribosome	Cellular Component	27	E5RI99,P05387,P32969,P62750,P63173,P30050,J3QQQ9,P18124,P36578,Q02878,Q9Y3U8,P62424,P42766,P83881,Q8IWR8,P26373,Q6DKI1,P49207,P08708,P23396,P60866,P42677,P62269,P62280,P62851,P62753,P25398
5	GO:0042788	polysomal ribosome	Cellular Component	7	Q08211,P63173,Q02878,Q9Y3U8,P62424,P83881,P13639
5	GO:0005684	U2-type spliceosomal complex	Cellular Component	12	P62318,P62314,O75533,P55769,P62306,Q8NAV1,Q6P2Q9,O94906,P38919,Q9Y5S9,Q9UMS4,Q9NW64
5	GO:0005689	U12-type spliceosomal complex	Cellular Component	4	P62318,P62314,P62306,O75533
5	GO:0044530	supraspliceosomal complex	Cellular Component	1	P38159
5	GO:0071010	prespliceosome	Cellular Component	1	O75533
5	GO:0071011	precatalytic spliceosome	Cellular Component	8	P62318,P55769,P62314,P62306,O75533,Q8NAV1,Q6P2Q9,O94906
5	GO:0090661	box H/ACA telomerase RNP complex	Cellular Component	1	Q9NY12
5	GO:0031428	box C/D snoRNP complex	Cellular Component	3	Q9Y2X3,P55769,O43818
5	GO:0072588	box H/ACA RNP complex	Cellular Component	1	Q9NY12
5	GO:0030686	90S preribosome	Cellular Component	6	Q9UNX4,A0A0B4J2E5,Q9NV31,U3KQ48,Q9GZL7,Q14692
5	GO:0030687	preribosome, large subunit precursor	Cellular Component	7	B4DEN9,Q15050,Q9GZL7,Q8IY81,B5MCF9,Q9H9Y2,Q9Y4W2
5	GO:0030688	preribosome, small subunit precursor	Cellular Component	2	Q96GA3,Q8IY81
5	GO:0032040	small-subunit processome	Cellular Component	13	Q9NV31,Q9Y2X3,P55769,Q66K47,Q9NV06,J3KNP2,Q9UNX4,Q9Y3A2,O43818,A0A0A0MTB8,Q96GC8,Q14690,A0A0B4J2E5
5	GO:0016442	RISC complex	Cellular Component	1	Q08211
5	GO:0036464	cytoplasmic ribonucleoprotein granule	Cellular Component	7	Q9NZI8,Q15717,Q08J23,Q08211,Q02878,P62753,Q15365
5	GO:0097165	nuclear stress granule	Cellular Component	1	Q08211
5	GO:0015934	large ribosomal subunit	Cellular Component	23	E5RI99,P05387,P32969,P62750,P63173,P30050,J3QQQ9,P18124,P36578,Q02878,Q9Y3U8,P62424,P42766,P83881,Q8IWR8,P26373,Q6DKI1,P49207,Q9NWU5,Q96A35,A0A087WXM6,Q0VGL3,Q1JQ76
5	GO:0015935	small ribosomal subunit	Cellular Component	15	P08708,P23396,P60866,P42677,P62269,P62280,P62851,P62753,P25398,O15235,P82921,Q96EL2,D6RD47,M0R0F0,C9J9K3
5	GO:0033291	eukaryotic 80S initiation complex	Cellular Component	1	P63173
5	GO:0090575	RNA polymerase II transcription factor complex	Cellular Component	1	P17096
5	GO:0097513	myosin II filament	Cellular Component	3	P35580,P35579,Q7Z406
5	GO:0000783	nuclear telomere cap complex	Cellular Component	2	P12956,P13010
5	GO:0016342	catenin complex	Cellular Component	1	A0A024R1X8
5	GO:0001405	PAM complex, Tim23 associated import motor	Cellular Component	1	Q8TAA5
5	GO:0005744	TIM23 mitochondrial import inner membrane translocase complex	Cellular Component	2	Q8TAA5,P12236
5	GO:0005753	mitochondrial proton-transporting ATP synthase complex	Cellular Component	1	P25705
5	GO:0034702	ion channel complex	Cellular Component	1	O14958
5	GO:0098533	ATPase dependent transmembrane transport complex	Cellular Component	1	P16615
5	GO:0031011	Ino80 complex	Cellular Component	2	B5BUB1,M0R0Y3
5	GO:0071006	U2-type catalytic step 1 spliceosome	Cellular Component	5	P38919,Q9Y5S9,Q9UMS4,Q9NW64,Q6P2Q9
5	GO:0071007	U2-type catalytic step 2 spliceosome	Cellular Component	6	P62318,P62314,P62306,Q9UMS4,Q9NW64,Q6P2Q9
5	GO:0031391	Elg1 RFC-like complex	Cellular Component	1	P35251
5	GO:0070603	SWI/SNF superfamily-type complex	Cellular Component	3	B4DZC0,B5BUB1,M0R0Y3
5	GO:1902555	endoribonuclease complex	Cellular Component	3	Q08211,Q9Y4W2,Q7L0Y3
5	GO:0090730	Las1 complex	Cellular Component	1	Q9Y4W2
5	GO:1905369	endopeptidase complex	Cellular Component	2	Q9NSM5,H0YLS6
5	GO:0061695	transferase complex, transferring phosphorus-containing groups	Cellular Component	4	P14618,Q9Y4W2,P24928,P24941
5	GO:1902493	acetyltransferase complex	Cellular Component	2	B5BUB1,M0R0Y3
5	GO:0005958	DNA-dependent protein kinase-DNA ligase 4 complex	Cellular Component	1	P78527
5	GO:0005739	mitochondrion	Cellular Component	48	Q8TAA5,Q96HS1,Q5JSD2,P23396,P05141,P25705,P12236,P54886,O15235,A8K787,P82921,Q9NWU5,Q96EL2,Q96A35,H9E7B8,Q04837,P13804,P38117,P11177,A8K651,P30048,Q7L0Y3,A0A384N647,B4DRH6,P49411,P09874,Q9NR30,Q12906,Q13584,P14618,P49916,M0QYT0,A0A087WVM4,H0YG82,H0YMU3,H7BXY3,H0Y2W2,Q8N1B9,P63104,F8VVM2,S4R3W9,B4DU83,Q5T3Q7,P11021,C9J7P5,Q9BSH4,Q5JTZ9,A0A1B0GV49
5	GO:0005773	vacuole	Cellular Component	9	Q00610,P02774,P09496,P68371,P31151,P61160,Q86YZ3,Q96GA3,P68104
5	GO:0005634	nucleus	Cellular Component	199	P16104,O00422,P45973,O75367,Q15050,Q9BYG3,P23258,P62318,P62314,Q86V81,P12956,P13010,P09874,Q9P0M6,Q9NY12,P78527,Q9H0A0,Q96KK5,P16403,Q5U071,Q08945,Q9Y2X3,M0R0P1,Q8TED0,Q15061,Q5T3Q7,P55769,K7EJB5,P62306,O75531,Q9H444,P50402,Q92621,P22626,Q08211,P16615,P08708,P23396,A0A087X0X3,Q9NV31,F8W6I7,Q9NZI8,P60866,P42677,P62269,E9PCY7,P62280,Q9NR30,Q12906,P38159,D6RFX4,P38919,P55795,P11177,P61326,D6R9P3,Q5T…
5	GO:0005793	endoplasmic reticulum-Golgi intermediate compartment	Cellular Component	1	P11021
5	GO:0031094	platelet dense tubular network	Cellular Component	1	P16615
5	GO:0005740	mitochondrial envelope	Cellular Component	15	Q96HS1,Q5JSD2,P23396,P05141,P25705,P12236,P54886,O15235,A8K787,P82921,Q9NWU5,Q96EL2,Q96A35,H9E7B8,Q8TAA5
5	GO:0098791	Golgi subcompartment	Cellular Component	4	P61026,O14578,P09496,Q00610
5	GO:0098827	endoplasmic reticulum subcompartment	Cellular Component	6	P16615,P61026,Q9Y5M8,P11021,Q96HX3,O14958
5	GO:0043292	contractile fiber	Cellular Component	11	Q9Y623,P08590,P11055,P14649,P63316,Q7Z554,O43707,P12814,O14958,O75369,P06733
5	GO:0005694	chromosome	Cellular Component	45	O75367,O75531,P11388,P24941,P16104,Q15050,Q9BYG3,P23258,Q9P0M6,P45973,P22626,Q15185,P12956,P13010,P09874,Q9NY12,P78527,Q9H0A0,A6NL93,Q15061,Q96KK5,K7EMV3,C9J0D1,Q5TEC6,P16403,Q92522,Q5U071,Q08945,P35251,S4R2Y4,P38159,P17987,Q08211,B4DZC0,B5BUB1,M0R0Y3,O15144,P61160,Q9UMS4,P17096,Q9Y5B9,Q15397,B5MCF9,B9EG90,B0AZQ4
5	GO:0005730	nucleolus	Cellular Component	73	Q9Y2X3,M0R0P1,Q15050,Q9NY12,Q8TED0,Q15061,Q5T3Q7,P55769,O43818,Q9UNX4,A0A0B4J2E5,Q9H8H0,Q9NV31,U3KQ48,Q9GZL7,P09874,P68104,Q08211,P23396,P62750,D6RG13,G3V203,P30050,P62280,O75367,P12956,P18124,Q9NR30,P36578,B4DY09,Q12906,Q9Y3U8,P38919,J3QSV6,P62424,P42766,P62851,P26373,Q6DKI1,P62753,Q8N4P8,B4DEN9,Q13243,Q9NV06,J3KNP2,Q08945,P11388,Q9BYG3,Q13595,B4DPI9,P13010,Q5QJE6,Q92522,P98179,Q15397,Q8IY81,B9A…
5	GO:0005811	lipid droplet	Cellular Component	2	P04406,Q9UMS4
5	GO:0005814	centriole	Cellular Component	1	P23258
5	GO:0005819	spindle	Cellular Component	10	P05141,P23396,Q00610,P23258,P35580,P35579,Q9UMS4,P50402,P09496,Q08J23
5	GO:0005856	cytoskeleton	Cellular Component	64	P35579,Q08211,A0A0K0K1I0,H0YK48,E9PLJ3,J3KN67,Q16643,F6RFD5,O15144,P61160,O15143,O75369,Q96SB3,O14578,P04406,O43707,P68104,Q562R1,B4DXW1,F8WDD7,B2R4D5,A0A1W2PNV4,B1AK87,A8K0T9,C9JUG7,P35580,M0QY43,P19105,J3QRN6,P14649,E9PDF6,B7Z3E5,D3DTH7,A0A0A0MRM8,Q59FF5,Q7Z406,Q9UMS4,P50402,P23258,P09496,Q08J23,Q00610,P68371,P17987,A0A2U3TZL8,A0A0D9SFE5,P12814,P16104,E5RK82,Q9NV06,P24941,P08590,P11055,Q9Y623,P…
5	GO:0031410	cytoplasmic vesicle	Cellular Component	26	P61026,O15144,Q9H444,P62330,P24941,Q00610,P30048,P23258,P09496,O75369,P63104,P11021,P17987,Q96GA3,P68104,P12956,P14618,P13639,P13010,O43707,P12814,P68371,P31151,P61160,Q86YZ3,B4DXN3
5	GO:0000785	chromatin	Cellular Component	22	Q96KK5,K7EMV3,O75367,P16104,C9J0D1,Q5TEC6,P16403,Q9P0M6,Q92522,Q5U071,Q08945,S4R2Y4,P38159,P17987,P45973,P17096,Q08211,B4DZC0,B5BUB1,M0R0Y3,A6NL93,Q15061
5	GO:0005657	replication fork	Cellular Component	2	P35251,P16104
5	GO:0044454	nuclear chromosome part	Cellular Component	21	P12956,P13010,P09874,O75367,Q9P0M6,Q9NY12,P45973,P78527,Q9H0A0,Q96KK5,P16104,P16403,Q5U071,Q08945,Q08211,S4R2Y4,P38159,P17987,B4DZC0,B5BUB1,M0R0Y3
5	GO:0090734	site of DNA damage	Cellular Component	7	P09874,P16104,O15144,P61160,Q9UMS4,P13010,P45973
5	GO:0098687	chromosomal region	Cellular Component	12	P22626,Q15185,P24941,P45973,P09874,O75367,P12956,Q9P0M6,Q9NY12,P13010,P78527,Q9H0A0
5	GO:0000228	nuclear chromosome	Cellular Component	24	P16104,Q15050,Q9BYG3,P23258,O75367,Q9P0M6,P12956,P13010,P09874,Q9NY12,P45973,P78527,Q9H0A0,Q96KK5,P16403,Q5U071,Q08945,S4R2Y4,P38159,P17987,Q08211,B4DZC0,B5BUB1,M0R0Y3
5	GO:0005654	nucleoplasm	Cellular Component	104	O00422,P45973,P24928,P22626,Q9Y2X3,P24941,Q08211,O43707,P62318,I3L2C7,P16104,Q9NSS8,Q86V81,P38919,P61326,K7EPJ3,J3QL05,Q13243,Q9Y5S9,Q15365,Q9UMS4,O75533,Q6P2Q9,O94906,H7C1M2,Q9Y5B9,Q08945,B5BUB1,M0R0Y3,Q9Y4W2,Q9NY12,P09874,P16615,P08708,P23396,A0A087X0X3,Q9NV31,F8W6I7,P55769,Q9NZI8,O75531,P60866,P42677,P62269,E9PCY7,P62280,P12956,Q9NR30,Q12906,P38159,P62314,D6RFX4,Q9P0M6,P55795,P11177,D6R9P3,Q5T…
5	GO:0016363	nuclear matrix	Cellular Component	2	P22626,B4DXN3
5	GO:0034399	nuclear periphery	Cellular Component	3	P22626,B4DXN3,Q92621
5	GO:0044451	nucleoplasm part	Cellular Component	31	O00422,P45973,P24928,Q08211,O43707,P62318,I3L2C7,Q9NY12,Q9Y5B9,Q08945,P22626,Q9Y2X3,P24941,P16104,Q9NSS8,Q86V81,P38919,P61326,K7EPJ3,J3QL05,Q13243,Q9Y5S9,Q15365,Q9UMS4,O75533,Q6P2Q9,O94906,H7C1M2,Q9Y4W2,B5BUB1,M0R0Y3
5	GO:0044452	nucleolar part	Cellular Component	15	Q9Y2X3,M0R0P1,Q15050,Q9NY12,Q8TED0,Q15061,Q5T3Q7,P55769,O43818,Q9UNX4,A0A0B4J2E5,Q9H8H0,Q9NV31,U3KQ48,Q9GZL7
5	GO:0055029	nuclear DNA-directed RNA polymerase complex	Cellular Component	1	P24928
5	GO:0000922	spindle pole	Cellular Component	1	P23258
5	GO:0005815	microtubule organizing center	Cellular Component	7	Q08211,P16104,E5RK82,Q9NV06,P17987,P24941,P23258
5	GO:0005865	striated muscle thin filament	Cellular Component	2	P63316,Q7Z554
5	GO:0030478	actin cap	Cellular Component	1	P61160
5	GO:0030479	actin cortical patch	Cellular Component	1	P61160
5	GO:0030864	cortical actin cytoskeleton	Cellular Component	5	P35579,P61160,P68104,Q16643,Q96SB3
5	GO:0032432	actin filament bundle	Cellular Component	6	P35580,P35579,Q7Z406,O43707,P12814,O75369
5	GO:0042641	actomyosin	Cellular Component	7	P35580,P35579,Q7Z406,O43707,P12814,O75369,Q16643
5	GO:0044450	microtubule organizing center part	Cellular Component	2	P17987,P23258
5	GO:0099513	polymeric cytoskeletal fiber	Cellular Component	10	A0A0D9SFE5,P68371,P17987,P50402,P23258,A0A2U3TZL8,Q562R1,B4DJT7,Q9Y5M8,Q00610
5	GO:0030130	clathrin coat of trans-Golgi network vesicle	Cellular Component	2	P09496,Q00610
5	GO:0014801	longitudinal sarcoplasmic reticulum	Cellular Component	1	P16615
5	GO:0044440	endosomal part	Cellular Component	7	Q96GA3,P62330,Q9H444,P09496,Q00610,P61026,B4DXN3
5	GO:0098574	cytoplasmic side of lysosomal membrane	Cellular Component	1	P68104
5	GO:0005887	integral component of plasma membrane	Cellular Component	2	P16615,P05141
5	GO:0005769	early endosome	Cellular Component	2	P62330,P30048
5	GO:0005770	late endosome	Cellular Component	2	Q96GA3,Q9H444
5	GO:0036019	endolysosome	Cellular Component	2	P09496,Q00610
5	GO:0055037	recycling endosome	Cellular Component	3	P61026,P62330,P23258
5	GO:0005790	smooth endoplasmic reticulum	Cellular Component	1	P11021
5	GO:0005791	rough endoplasmic reticulum	Cellular Component	2	P36578,Q02878
5	GO:0016529	sarcoplasmic reticulum	Cellular Component	2	P16615,O14958
5	GO:0030140	trans-Golgi network transport vesicle	Cellular Component	2	P09496,Q00610
5	GO:0070382	exocytic vesicle	Cellular Component	2	P61026,P09496
5	GO:0031091	platelet alpha granule	Cellular Component	2	O43707,P12814
5	GO:0032593	insulin-responsive compartment	Cellular Component	1	P61026
5	GO:0034774	secretory granule lumen	Cellular Component	11	O43707,P12814,P68371,P31151,P61160,Q86YZ3,P68104,P12956,P14618,P13639,P13010
5	GO:0042582	azurophil granule	Cellular Component	4	P68371,P31151,P61160,Q86YZ3
5	GO:0101002	ficolin-1-rich granule	Cellular Component	5	P68104,P12956,P14618,P13639,P61160
5	GO:0031143	pseudopodium	Cellular Component	2	O43707,P12814
5	GO:0036194	muscle cell projection	Cellular Component	1	O15144
5	GO:0071437	invadopodium	Cellular Component	1	P61160
5	GO:0098858	actin-based cell projection	Cellular Component	3	Q9NZI8,Q96SB3,P62330
5	GO:0031461	cullin-RING ubiquitin ligase complex	Cellular Component	1	Q9NV06
5	GO:0097123	cyclin A1-CDK2 complex	Cellular Component	1	P24941
5	GO:0097124	cyclin A2-CDK2 complex	Cellular Component	1	P24941
5	GO:0097134	cyclin E1-CDK2 complex	Cellular Component	1	P24941
5	GO:0097135	cyclin E2-CDK2 complex	Cellular Component	1	P24941
5	GO:0016528	sarcoplasm	Cellular Component	2	P16615,O14958
5	GO:0099568	cytoplasmic region	Cellular Component	11	P35580,P62330,O75369,P06733,P09496,P35579,P61160,O43707,Q16643,P68104,Q96SB3
5	GO:0016235	aggresome	Cellular Component	1	P13639
5	GO:0000428	DNA-directed RNA polymerase complex	Cellular Component	1	P24928
5	GO:0000123	histone acetyltransferase complex	Cellular Component	2	B5BUB1,M0R0Y3
5	GO:0034709	methylosome	Cellular Component	4	P62318,P62314,P62306,E9PMI6
5	GO:0035097	histone methyltransferase complex	Cellular Component	2	Q9Y4W2,P45973
5	GO:0005829	cytosol	Cellular Component	126	Q16643,P38919,P06733,E5RI99,P05387,P32969,P62750,P63173,P30050,J3QQQ9,P18124,P36578,Q02878,Q9Y3U8,P62424,P42766,P83881,Q8IWR8,P26373,Q6DKI1,P49207,P08708,P23396,P60866,P42677,P62269,P62280,P62851,P62753,P25398,F8VQ14,P17987,G3V1N2,Q5XTR9,Q9Y4W2,P35580,P35579,Q7Z406,P04406,P68104,Q08211,P19105,Q5JR95,C9JXB8,F8W7C6,O43707,P62318,D6RG13,P08590,K7EJB5,G3V203,Q9Y2X3,P68371,Q9NZI8,O75531,A0A0K0K1I0,H0Y…
5	GO:0005881	cytoplasmic microtubule	Cellular Component	2	Q9Y5M8,P23258
5	GO:0005883	neurofilament	Cellular Component	1	B4DJT7
5	GO:0036457	keratohyalin granule	Cellular Component	1	Q86YZ3
5	GO:0044445	cytosolic part	Cellular Component	35	P06733,E5RI99,P05387,P32969,P62750,P63173,P30050,J3QQQ9,P18124,P36578,Q02878,Q9Y3U8,P62424,P42766,P83881,Q8IWR8,P26373,Q6DKI1,P49207,P08708,P23396,P60866,P42677,P62269,P62280,P62851,P62753,P25398,F8VQ14,P17987,G3V1N2,Q5XTR9,Q9Y4W2,Q16643,P38919
5	GO:0044448	cell cortex part	Cellular Component	8	P35579,P61160,O43707,Q16643,P06733,P68104,Q96SB3,P09496
5	GO:0048471	perinuclear region of cytoplasm	Cellular Component	7	P04406,P16615,O43707,Q9NZI8,P61026,P62753,Q86YZ3
5	GO:0030425	dendrite	Cellular Component	10	P35580,Q9NZI8,P18085,Q96SB3,Q16643,P38919,P62753,P12277,Q9Y5S9,P98179
5	GO:0099738	cell cortex region	Cellular Component	2	P09496,P06733
5	GO:0030424	axon	Cellular Component	5	P35580,Q7Z406,Q9NZI8,Q16643,Q96SB3
5	GO:0044309	neuron spine	Cellular Component	4	P35580,Q9NZI8,P18085,Q96SB3
5	GO:0097447	dendritic tree	Cellular Component	10	Q16643,P38919,P62753,P12277,Q9Y5S9,P98179,Q96SB3,P35580,Q9NZI8,P18085
5	GO:0032590	dendrite membrane	Cellular Component	1	Q96SB3
5	GO:0150034	distal axon	Cellular Component	5	P35580,Q7Z406,Q9NZI8,Q16643,Q96SB3
6	GO:0032588	trans-Golgi network membrane	Cellular Component	2	P09496,Q00610
6	GO:0030125	clathrin vesicle coat	Cellular Component	2	P09496,Q00610
6	GO:0005765	lysosomal membrane	Cellular Component	3	P09496,Q00610,P68104
6	GO:0035578	azurophil granule lumen	Cellular Component	4	P68371,P31151,P61160,Q86YZ3
6	GO:0043202	lysosomal lumen	Cellular Component	1	P02774
6	GO:0033018	sarcoplasmic reticulum lumen	Cellular Component	1	O14958
6	GO:0005682	U5 snRNP	Cellular Component	4	P62318,P62314,Q6P2Q9,O94906
6	GO:0005685	U1 snRNP	Cellular Component	3	P62318,P62314,P62306
6	GO:0005686	U2 snRNP	Cellular Component	3	P62318,P62314,O75533
6	GO:0005687	U4 snRNP	Cellular Component	3	P62318,P62314,P62306
6	GO:0005690	U4atac snRNP	Cellular Component	1	P55769
6	GO:0034693	U11/U12 snRNP	Cellular Component	1	O75533
6	GO:0097526	spliceosomal tri-snRNP complex	Cellular Component	6	P62318,P55769,P62314,P62306,Q6P2Q9,O94906
6	GO:0022625	cytosolic large ribosomal subunit	Cellular Component	18	E5RI99,P05387,P32969,P62750,P63173,P30050,J3QQQ9,P18124,P36578,Q02878,Q9Y3U8,P62424,P42766,P83881,Q8IWR8,P26373,Q6DKI1,P49207
6	GO:0022627	cytosolic small ribosomal subunit	Cellular Component	9	P08708,P23396,P60866,P42677,P62269,P62280,P62851,P62753,P25398
6	GO:0000243	commitment complex	Cellular Component	2	P62318,P62314
6	GO:0071004	U2-type prespliceosome	Cellular Component	1	O75533
6	GO:0071005	U2-type precatalytic spliceosome	Cellular Component	8	P62318,P55769,P62314,P62306,O75533,Q8NAV1,Q6P2Q9,O94906
6	GO:0010494	cytoplasmic stress granule	Cellular Component	2	Q9NZI8,Q15717
6	GO:0033391	chromatoid body	Cellular Component	1	Q08J23
6	GO:0034703	cation channel complex	Cellular Component	1	O14958
6	GO:0090533	cation-transporting ATPase complex	Cellular Component	1	P16615
6	GO:0031010	ISWI-type complex	Cellular Component	1	B4DZC0
6	GO:0097346	INO80-type complex	Cellular Component	2	B5BUB1,M0R0Y3
6	GO:0070578	RISC-loading complex	Cellular Component	1	Q08211
6	GO:1902911	protein kinase complex	Cellular Component	2	Q9Y4W2,P24941
6	GO:1902912	pyruvate kinase complex	Cellular Component	1	P14618
6	GO:0000323	lytic vacuole	Cellular Component	8	Q00610,P02774,P09496,P68371,P31151,P61160,Q86YZ3,P68104
6	GO:0043073	germ cell nucleus	Cellular Component	1	P16104
6	GO:0005795	Golgi stack	Cellular Component	1	O14578
6	GO:0005802	trans-Golgi network	Cellular Component	3	P09496,Q00610,P61026
6	GO:0031985	Golgi cisterna	Cellular Component	1	O14578
6	GO:0071782	endoplasmic reticulum tubular network	Cellular Component	1	P61026
6	GO:0030016	myofibril	Cellular Component	10	P08590,P11055,Q9Y623,P63316,Q7Z554,P06733,O43707,P12814,O14958,O75369
6	GO:0000793	condensed chromosome	Cellular Component	8	P16104,Q15050,Q9BYG3,P23258,O75531,O75367,P11388,P24941
6	GO:0000803	sex chromosome	Cellular Component	4	P24941,O75367,P16104,Q9P0M6
6	GO:0005876	spindle microtubule	Cellular Component	2	P23258,Q00610
6	GO:0072686	mitotic spindle	Cellular Component	2	Q00610,P23396
6	GO:0015629	actin cytoskeleton	Cellular Component	41	Q562R1,B4DXW1,F8WDD7,B2R4D5,O15144,P61160,O15143,A0A1W2PNV4,B1AK87,A8K0T9,C9JUG7,P35580,M0QY43,P19105,J3QRN6,P14649,E9PDF6,B7Z3E5,D3DTH7,A0A0A0MRM8,Q59FF5,P68104,Q16643,Q96SB3,P35579,Q7Z406,P08590,P11055,Q9Y623,O43707,P12814,O75369,P63316,Q7Z554,Q08211,A0A0K0K1I0,H0YK48,E9PLJ3,J3KN67,F6RFD5,O14578
6	GO:0015630	microtubule cytoskeleton	Cellular Component	20	P35580,P35579,Q9UMS4,P50402,P23258,P09496,Q08J23,Q00610,P68371,P17987,A0A2U3TZL8,Q08211,P16104,E5RK82,Q9NV06,P24941,P23396,Q9Y5M8,P05141,P04406
6	GO:0030863	cortical cytoskeleton	Cellular Component	6	P68104,Q16643,Q96SB3,P35579,P61160,O43707
6	GO:0045111	intermediate filament cytoskeleton	Cellular Component	2	A0A0D9SFE5,B4DJT7
6	GO:0005798	Golgi-associated vesicle	Cellular Component	2	P09496,Q00610
6	GO:0030139	endocytic vesicle	Cellular Component	5	P09496,Q00610,O75369,P61026,P62330
6	GO:0030135	coated vesicle	Cellular Component	2	Q00610,P09496
6	GO:0048770	pigment granule	Cellular Component	3	P63104,P11021,Q00610
6	GO:0099503	secretory vesicle	Cellular Component	14	P61026,P17987,P68104,P12956,P14618,P13639,P13010,P09496,O43707,P12814,P68371,P31151,P61160,Q86YZ3
6	GO:0000790	nuclear chromatin	Cellular Component	15	S4R2Y4,P38159,P16403,P17987,P45973,Q08211,O75367,B4DZC0,B5BUB1,M0R0Y3,Q96KK5,P16104,Q9P0M6,Q5U071,Q08945
6	GO:0000791	euchromatin	Cellular Component	3	S4R2Y4,P38159,P16403
6	GO:0000792	heterochromatin	Cellular Component	4	P17987,P45973,O75367,P17096
6	GO:0035327	transcriptionally active chromatin	Cellular Component	1	P16403
6	GO:0000784	nuclear chromosome, telomeric region	Cellular Component	9	P12956,P13010,P09874,O75367,Q9P0M6,Q9NY12,P45973,P78527,Q9H0A0
6	GO:0005726	perichromatin fibrils	Cellular Component	1	Q08211
6	GO:0035861	site of double-strand break	Cellular Component	5	P09874,P16104,O15144,P61160,Q9UMS4
6	GO:0000775	chromosome, centromeric region	Cellular Component	2	P45973,O75367
6	GO:0000781	chromosome, telomeric region	Cellular Component	12	P09874,O75367,P12956,Q9P0M6,Q9NY12,P13010,P45973,P78527,Q9H0A0,P22626,Q15185,P24941
6	GO:0010369	chromocenter	Cellular Component	1	P45973
6	GO:0000794	condensed nuclear chromosome	Cellular Component	4	P16104,Q15050,Q9BYG3,P23258
6	GO:0001740	Barr body	Cellular Component	2	O75367,Q9P0M6
6	GO:0005665	RNA polymerase II, core complex	Cellular Component	1	P24928
6	GO:0016591	RNA polymerase II, holoenzyme	Cellular Component	1	P24928
6	GO:0016604	nuclear body	Cellular Component	24	P22626,Q9Y2X3,P24941,P16104,Q9NSS8,Q86V81,P38919,P61326,K7EPJ3,O00422,J3QL05,Q13243,Q9Y5S9,Q15365,Q9UMS4,O75533,Q6P2Q9,O94906,H7C1M2,Q9NY12,Q08211,O43707,P62318,I3L2C7
6	GO:0001650	fibrillar center	Cellular Component	7	Q9Y2X3,M0R0P1,Q15050,Q9NY12,Q8TED0,Q15061,Q5T3Q7
6	GO:0001651	dense fibrillar component	Cellular Component	1	P55769
6	GO:0005827	polar microtubule	Cellular Component	1	P23258
6	GO:0005813	centrosome	Cellular Component	7	P17987,P23258,Q08211,P16104,E5RK82,Q9NV06,P24941
6	GO:0097517	contractile actin filament bundle	Cellular Component	6	P35580,P35579,Q7Z406,O43707,P12814,O75369
6	GO:0001725	stress fiber	Cellular Component	6	P35580,P35579,Q7Z406,O43707,P12814,O75369
6	GO:0000242	pericentriolar material	Cellular Component	2	P17987,P23258
6	GO:0005882	intermediate filament	Cellular Component	2	B4DJT7,A0A0D9SFE5
6	GO:0005874	microtubule	Cellular Component	7	Q9Y5M8,P23258,Q00610,P68371,P17987,P50402,A0A2U3TZL8
6	GO:0005884	actin filament	Cellular Component	1	Q562R1
6	GO:0031093	platelet alpha granule lumen	Cellular Component	2	O43707,P12814
6	GO:0030175	filopodium	Cellular Component	3	P62330,Q9NZI8,Q96SB3
6	GO:0080008	Cul4-RING E3 ubiquitin ligase complex	Cellular Component	1	Q9NV06
6	GO:1902562	H4 histone acetyltransferase complex	Cellular Component	2	B5BUB1,M0R0Y3
6	GO:0044665	MLL1/2 complex	Cellular Component	1	Q9Y4W2
6	GO:0099522	region of cytosol	Cellular Component	2	Q16643,P38919
6	GO:0061645	endocytic patch	Cellular Component	1	P61160
7	GO:0046540	U4/U6 x U5 tri-snRNP complex	Cellular Component	6	P62318,P55769,P62314,P62306,Q6P2Q9,O94906
7	GO:0034704	calcium channel complex	Cellular Component	1	O14958
7	GO:0090534	calcium ion-transporting ATPase complex	Cellular Component	1	P16615
7	GO:0016589	NURF complex	Cellular Component	1	B4DZC0
7	GO:1902554	serine/threonine protein kinase complex	Cellular Component	1	P24941
7	GO:0005764	lysosome	Cellular Component	8	P02774,P09496,Q00610,P68371,P31151,P61160,Q86YZ3,P68104
7	GO:0001673	male germ cell nucleus	Cellular Component	1	P16104
7	GO:0000805	X chromosome	Cellular Component	3	O75367,Q9P0M6,P24941
7	GO:0000806	Y chromosome	Cellular Component	1	P24941
7	GO:0001739	sex chromatin	Cellular Component	1	O75367
7	GO:0001741	XY body	Cellular Component	1	P16104
7	GO:1990498	mitotic spindle microtubule	Cellular Component	1	Q00610
7	GO:0045334	clathrin-coated endocytic vesicle	Cellular Component	2	Q00610,P09496
7	GO:0045335	phagocytic vesicle	Cellular Component	2	P61026,O75369
7	GO:0030136	clathrin-coated vesicle	Cellular Component	2	P09496,Q00610
7	GO:0042470	melanosome	Cellular Component	3	P63104,P11021,Q00610
7	GO:0005719	nuclear euchromatin	Cellular Component	3	S4R2Y4,P38159,P16403
7	GO:0005720	nuclear heterochromatin	Cellular Component	3	O75367,P45973,P17987
7	GO:0005721	pericentric heterochromatin	Cellular Component	2	P45973,O75367
7	GO:0035985	senescence-associated heterochromatin focus	Cellular Component	1	P17096
7	GO:0015030	Cajal body	Cellular Component	4	Q9NY12,P22626,Q9Y2X3,P24941
7	GO:0016607	nuclear speck	Cellular Component	16	P16104,Q9NSS8,Q86V81,P38919,P61326,K7EPJ3,O00422,J3QL05,Q13243,Q9Y5S9,Q15365,Q9UMS4,O75533,Q6P2Q9,O94906,H7C1M2
7	GO:0043189	H4/H2A histone acetyltransferase complex	Cellular Component	2	B5BUB1,M0R0Y3
7	GO:0071339	MLL1 complex	Cellular Component	1	Q9Y4W2
8	GO:0005766	primary lysosome	Cellular Component	4	P68371,P31151,P61160,Q86YZ3
8	GO:0031618	nuclear pericentric heterochromatin	Cellular Component	1	P45973
8	GO:0035267	NuA4 histone acetyltransferase complex	Cellular Component	2	B5BUB1,M0R0Y3
