# Supplementary material for: A High-Throughput Method to Analyze the Interaction Proteins With p22 Protein of African Swine Fever Virus In Vitro
Source: Front Vet Sci. 2021 Sep 6;8:719859. doi: 10.3389/fvets.2021.719859 (PMC8450437; doi:10.3389/fvets.2021.719859)
Supplement: Supplementary Table 3 — Proteins accession numbers and description. [file Table_3.XLSX]

## Sheet: Sheet1
Accession	Description	ΣCoverage	Σ# Proteins	Σ# Unique Peptides	Σ# Peptides	Σ# PSMs	Score R20190500692_22IP	Coverage R20190500692_22IP	# Peptides R20190500692_22IP	# PSM R20190500692_22IP	# AAs	MW [kDa]	calc. pI
F8VP99	ADP-ribosylation factor-like protein 1 (Fragment) OS=Homo sapiens OX=9606 GN=ARL1 PE=1 SV=1 - [F8VP99_HUMAN]	64.71	5	1	1	1	40.62	64.71	1	1	17	1.78406	8.99756
P19105	Myosin regulatory light chain 12A OS=Homo sapiens OX=9606 GN=MYL12A PE=1 SV=2 - [ML12A_HUMAN]	62.57	9	9	9	13	327.983	62.57	9	13	171	19.7815	4.80518
G8JLA2	Myosin light polypeptide 6 OS=Homo sapiens OX=9606 GN=MYL6 PE=1 SV=1 - [G8JLA2_HUMAN]	62.5	13	5	8	14	385.041	62.5	8	14	152	17.0782	4.55127
E5RI99	60S ribosomal protein L30 (Fragment) OS=Homo sapiens OX=9606 GN=RPL30 PE=1 SV=1 - [E5RI99_HUMAN]	58.77	5	6	6	6	122.736	58.77	6	6	114	12.6476	9.5542
P05387	60S acidic ribosomal protein P2 OS=Homo sapiens OX=9606 GN=RPLP2 PE=1 SV=1 - [RLA2_HUMAN]	57.39	2	4	4	4	102.407	57.39	4	4	115	11.6578	4.53857
Q6FG99	RPLP1 protein OS=Homo sapiens OX=9606 GN=RPLP1 PE=2 SV=1 - [Q6FG99_HUMAN]	53.51	1	2	2	2	41.9647	53.51	2	2	114	11.5608	4.37354
A0A191TDH3	Myosin light chain-2 (Fragment) OS=Homo sapiens OX=9606 GN=MYL2 PE=4 SV=1 - [A0A191TDH3_HUMAN]	52.94	6	1	1	1	62.76	52.94	1	1	34	3.90606	5.10986
A0A0A0MRQ5	Peroxiredoxin-1 OS=Homo sapiens OX=9606 GN=PRDX1 PE=1 SV=1 - [A0A0A0MRQ5_HUMAN]	52.58	8	4	4	4	64.2367	52.58	4	4	97	10.6695	8.71924
Q0QEN7	ATP synthase subunit beta (Fragment) OS=Homo sapiens OX=9606 GN=ATP5B PE=2 SV=1 - [Q0QEN7_HUMAN]	51.46	6	14	14	21	419.954	51.46	14	20	445	48.083	5.07178
K7EJT5	60S ribosomal protein L22 (Fragment) OS=Homo sapiens OX=9606 GN=RPL22 PE=1 SV=1 - [K7EJT5_HUMAN]	51.06	8	2	2	2	92.3401	51.06	2	2	47	5.07968	9.42236
A0A2R8YEA7	Actin, cytoplasmic 1 (Fragment) OS=Homo sapiens OX=9606 GN=ACTB PE=1 SV=1 - [A0A2R8YEA7_HUMAN]	50.96	6	1	5	36	746.021	50.96	5	35	157	17.4596	4.729
A0A2R8YFE2	Actin, cytoplasmic 1 (Fragment) OS=Homo sapiens OX=9606 GN=ACTB PE=1 SV=1 - [A0A2R8YFE2_HUMAN]	50.63	1	1	3	20	511.162	50.63	3	20	79	8.78146	9.20264
H0YIB4	Serine/arginine-rich-splicing factor 9 (Fragment) OS=Homo sapiens OX=9606 GN=SRSF9 PE=1 SV=8 - [H0YIB4_HUMAN]	47.71	5	6	6	6	99.6405	47.71	6	6	109	12.7163	5.37646
P35580	Myosin-10 OS=Homo sapiens OX=9606 GN=MYH10 PE=1 SV=3 - [MYH10_HUMAN]	47.57	13	73	84	148	3894.28	47.57	84	146	1976	228.858	5.5415
P35579	Myosin-9 OS=Homo sapiens OX=9606 GN=MYH9 PE=1 SV=4 - [MYH9_HUMAN]	47.55	9	73	86	145	3492.5	47.55	86	142	1960	226.392	5.60498
P22626	Heterogeneous nuclear ribonucleoproteins A2/B1 OS=Homo sapiens OX=9606 GN=HNRNPA2B1 PE=1 SV=2 - [ROA2_HUMAN]	46.46	5	12	14	19	367.442	46.46	14	18	353	37.4067	8.95361
S4R456	40S ribosomal protein S15 (Fragment) OS=Homo sapiens OX=9606 GN=RPS15 PE=1 SV=1 - [S4R456_HUMAN]	45.59	8	2	2	2	42.03	45.59	2	2	68	8.02147	11.4731
P32969	60S ribosomal protein L9 OS=Homo sapiens OX=9606 GN=RPL9 PE=1 SV=1 - [RL9_HUMAN]	43.75	9	5	5	6	89.74	43.75	5	6	192	21.8498	9.94971
Q5JR95	40S ribosomal protein S8 OS=Homo sapiens OX=9606 GN=RPS8 PE=1 SV=1 - [Q5JR95_HUMAN]	42.55	3	7	7	8	194.306	42.55	7	8	188	21.866	10.3599
A8K4Z4	60S acidic ribosomal protein P0 OS=Homo sapiens OX=9606 PE=2 SV=1 - [A8K4Z4_HUMAN]	42.27	19	9	9	10	199.471	42.27	9	9	317	34.2178	5.97314
B2R5W2	Heterogeneous nuclear ribonucleoproteins C1/C2 OS=Homo sapiens OX=9606 GN=HNRNPC PE=1 SV=1 - [B2R5W2_HUMAN]	42.07	30	12	12	15	294.062	42.07	12	15	290	31.9288	5.23682
C9JYQ9	60S ribosomal protein L22-like 1 OS=Homo sapiens OX=9606 GN=RPL22L1 PE=1 SV=1 - [C9JYQ9_HUMAN]	39.67	3	3	3	4	119.75	39.67	3	4	121	14.4695	9.37842
Q9BTQ7	Similar to ribosomal protein L23 (Fragment) OS=Homo sapiens OX=9606 PE=2 SV=1 - [Q9BTQ7_HUMAN]	39.55	6	4	4	7	209.202	39.55	4	7	134	14.1407	10.2573
Q8NI62	Ribosomal protein S2 OS=Homo sapiens OX=9606 GN=OK/KNS-cl.6 PE=2 SV=1 - [Q8NI62_HUMAN]	39.24	2	1	3	3	65.42	39.24	3	3	79	8.75228	8.00146
Q76N57	40S ribosomal protein S26 (Fragment) OS=Homo sapiens OX=9606 PE=3 SV=1 - [Q76N57_HUMAN]	39.13	4	1	1	1	34.92	39.13	1	1	23	2.54837	4.90674
P08708	40S ribosomal protein S17 OS=Homo sapiens OX=9606 GN=RPS17 PE=1 SV=2 - [RS17_HUMAN]	38.52	7	4	4	6	104.303	38.52	4	6	135	15.5404	9.84717
P23396	40S ribosomal protein S3 OS=Homo sapiens OX=9606 GN=RPS3 PE=1 SV=2 - [RS3_HUMAN]	37.04	16	10	10	11	124.376	37.04	10	11	243	26.6714	9.65674
P09874	Poly [ADP-ribose] polymerase 1 OS=Homo sapiens OX=9606 GN=PARP1 PE=1 SV=4 - [PARP1_HUMAN]	36.69	8	32	32	41	868.784	36.69	32	40	1014	113.012	8.88037
A0A248RGE3	40S ribosomal protein (Fragment) OS=Homo sapiens OX=9606 PE=2 SV=1 - [A0A248RGE3_HUMAN]	36.55	40	4	4	9	143.376	36.55	4	7	145	16.7068	9.53955
P62750	60S ribosomal protein L23a OS=Homo sapiens OX=9606 GN=RPL23A PE=1 SV=1 - [RL23A_HUMAN]	35.9	7	5	5	5	46.9771	35.9	5	5	156	17.6841	10.4478
C9JXB8	60S ribosomal protein L24 OS=Homo sapiens OX=9606 GN=RPL24 PE=1 SV=1 - [C9JXB8_HUMAN]	35.54	3	5	5	5	72.94	35.54	5	5	121	14.3598	11.312
Q7Z406	Myosin-14 OS=Homo sapiens OX=9606 GN=MYH14 PE=1 SV=2 - [MYH14_HUMAN]	35.29	9	31	58	70	1461.07	35.29	58	69	1995	227.732	5.60498
A0A087X0X3	Heterogeneous nuclear ribonucleoprotein M OS=Homo sapiens OX=9606 GN=HNRNPM PE=1 SV=1 - [A0A087X0X3_HUMAN]	35.21	16	24	24	28	507.099	35.21	24	28	730	77.5184	8.77783
B1AK87	F-actin-capping protein subunit beta OS=Homo sapiens OX=9606 GN=CAPZB PE=1 SV=1 - [B1AK87_HUMAN]	35	8	9	9	9	165.776	35	9	9	260	29.2768	6.91748
Q96IR1	RPS4X protein (Fragment) OS=Homo sapiens OX=9606 GN=RPS4X PE=2 SV=2 - [Q96IR1_HUMAN]	34.98	10	7	7	8	177.709	34.98	7	8	243	27.2427	9.93506
F8W7C6	60S ribosomal protein L10 OS=Homo sapiens OX=9606 GN=RPL10 PE=1 SV=2 - [F8W7C6_HUMAN]	34.97	11	5	5	8	286.009	34.97	5	8	163	18.5527	9.94971
A0A087WWU8	Tropomyosin alpha-3 chain OS=Homo sapiens OX=9606 GN=TPM3 PE=1 SV=1 - [A0A087WWU8_HUMAN]	34.8	20	2	8	11	142.337	34.8	8	11	227	26.4044	4.77979
P49411	Elongation factor Tu, mitochondrial OS=Homo sapiens OX=9606 GN=TUFM PE=1 SV=2 - [EFTU_HUMAN]	34.29	3	12	12	15	399.585	34.29	12	14	452	49.5102	7.60596
Q9NV31	U3 small nucleolar ribonucleoprotein protein IMP3 OS=Homo sapiens OX=9606 GN=IMP3 PE=1 SV=1 - [IMP3_HUMAN]	34.24	1	5	5	5	79.1419	34.24	5	5	184	21.8366	9.49561
J3KRY3	Small nuclear ribonucleoprotein-associated protein N (Fragment) OS=Homo sapiens OX=9606 GN=SNRPN PE=4 SV=1 - [J3KRY3_HUMAN]	33.9	12	2	2	2	66.25	33.9	2	2	59	6.95557	9.5249
O43707	Alpha-actinin-4 OS=Homo sapiens OX=9606 GN=ACTN4 PE=1 SV=2 - [ACTN4_HUMAN]	33.59	20	16	26	27	529.542	33.59	26	27	911	104.788	5.43994
Q9UPN1	Serine/threonine-protein phosphatase (Fragment) OS=Homo sapiens OX=9606 GN=PPP1CC PE=3 SV=1 - [Q9UPN1_HUMAN]	33.33	24	8	8	8	98.9533	33.33	8	8	294	33.7518	5.24951
Q04837	Single-stranded DNA-binding protein, mitochondrial OS=Homo sapiens OX=9606 GN=SSBP1 PE=1 SV=1 - [SSBP_HUMAN]	33.11	6	4	4	8	148.94	33.11	4	7	148	17.249	9.59814
Q96KK5	Histone H2A type 1-H OS=Homo sapiens OX=9606 GN=HIST1H2AH PE=1 SV=3 - [H2A1H_HUMAN]	32.81	21	1	4	11	198.018	32.81	4	11	128	13.8978	10.8872
M0QY43	Myosin-14 (Fragment) OS=Homo sapiens OX=9606 GN=MYH14 PE=1 SV=8 - [M0QY43_HUMAN]	32.34	6	2	26	32	613.392	32.34	26	31	1002	113.712	7.59131
A0A0B4J1Z1	Serine/arginine-rich-splicing factor 7 OS=Homo sapiens OX=9606 GN=SRSF7 PE=1 SV=1 - [A0A0B4J1Z1_HUMAN]	32.12	8	4	4	5	119.28	32.12	4	5	137	15.7528	9.80322
I3L3P7	40S ribosomal protein S15a OS=Homo sapiens OX=9606 GN=RPS15A PE=1 SV=1 - [I3L3P7_HUMAN]	32	9	3	3	3	73.6891	32	3	3	100	11.4702	10.1548
P62318	Small nuclear ribonucleoprotein Sm D3 OS=Homo sapiens OX=9606 GN=SNRPD3 PE=1 SV=1 - [SMD3_HUMAN]	31.75	2	3	3	3	53.6267	31.75	3	3	126	13.9073	10.3159
F5H793	L-lactate dehydrogenase B chain (Fragment) OS=Homo sapiens OX=9606 GN=LDHB PE=1 SV=1 - [F5H793_HUMAN]	31.37	5	2	2	2	65.56	31.37	2	2	102	10.7998	5.13525
A8K9K6	cDNA FLJ76962, highly similar to Homo sapiens nucleolar protein 5A (56kDa with KKE/D repeat) (NOL5A), mRNA OS=Homo sapiens OX=9606 PE=2 SV=1 - [A8K9K6_HUMAN]	30.98	7	13	13	15	268.404	30.98	13	15	594	65.9367	9.23193
M0QYR1	U1 small nuclear ribonucleoprotein 70 kDa (Fragment) OS=Homo sapiens OX=9606 GN=SNRNP70 PE=1 SV=1 - [M0QYR1_HUMAN]	30.85	3	3	3	3	33.73	30.85	3	3	94	11.4687	9.27588
B4E190	cDNA FLJ57770, moderately similar to ADP-ribosylation factor 3 OS=Homo sapiens OX=9606 PE=2 SV=1 - [B4E190_HUMAN]	30.56	15	3	4	4	91.87	30.56	4	4	144	16.1485	7.34229
D6RG13	40S ribosomal protein S3a (Fragment) OS=Homo sapiens OX=9606 GN=RPS3A PE=1 SV=1 - [D6RG13_HUMAN]	30.04	14	6	6	9	161.353	30.04	6	9	223	25.5914	9.65674
A0A2R8Y811	40S ribosomal protein S14 (Fragment) OS=Homo sapiens OX=9606 GN=RPS14 PE=1 SV=1 - [A0A2R8Y811_HUMAN]	30	3	4	4	5	173.291	30	4	5	150	16.1494	10.0522
P04406	Glyceraldehyde-3-phosphate dehydrogenase OS=Homo sapiens OX=9606 GN=GAPDH PE=1 SV=3 - [G3P_HUMAN]	29.85	7	7	7	8	233.857	29.85	7	7	335	36.0304	8.45557
P08590	Myosin light chain 3 OS=Homo sapiens OX=9606 GN=MYL3 PE=1 SV=3 - [MYL3_HUMAN]	29.74	3	4	5	7	173.135	29.74	5	7	195	21.9179	5.09717
K7EJB5	Small nuclear ribonucleoprotein Sm D2 OS=Homo sapiens OX=9606 GN=SNRPD2 PE=1 SV=1 - [K7EJB5_HUMAN]	29.63	2	2	2	2	65.0689	29.63	2	2	54	6.14043	10.2427
K7EMV3	Histone H3 OS=Homo sapiens OX=9606 GN=H3F3B PE=1 SV=1 - [K7EMV3_HUMAN]	29.35	15	1	3	4	65.7109	29.35	3	4	92	10.3278	11.8247
A0A2R8Y849	40S ribosomal protein S24 OS=Homo sapiens OX=9606 GN=RPS24 PE=1 SV=1 - [A0A2R8Y849_HUMAN]	29.01	6	3	3	3	65.3133	29.01	3	3	131	15.1873	10.9019
G3V203	60S ribosomal protein L18 OS=Homo sapiens OX=9606 GN=RPL18 PE=1 SV=1 - [G3V203_HUMAN]	28.66	9	4	4	4	185.87	28.66	4	4	164	18.7445	11.5903
P63173	60S ribosomal protein L38 OS=Homo sapiens OX=9606 GN=RPL38 PE=1 SV=2 - [RL38_HUMAN]	28.57	3	2	2	2	81.59	28.57	2	2	70	8.21273	10.0962
P30050	60S ribosomal protein L12 OS=Homo sapiens OX=9606 GN=RPL12 PE=1 SV=1 - [RL12_HUMAN]	28.48	3	3	3	3	67.1484	28.48	3	3	165	17.8075	9.42236
Q5H928	3-hydroxyacyl-CoA dehydrogenase type-2 OS=Homo sapiens OX=9606 GN=HSD17B10 PE=1 SV=1 - [Q5H928_HUMAN]	28.4	3	3	3	3	81.1767	28.4	3	3	169	17.2129	7.72314
Q15657	Tropomyosin isoform OS=Homo sapiens OX=9606 PE=2 SV=1 - [Q15657_HUMAN]	28.4	13	1	8	10	149.371	28.4	8	10	243	28.4026	4.93213
A0A087WXM6	60S ribosomal protein L17 (Fragment) OS=Homo sapiens OX=9606 GN=RPL17 PE=3 SV=1 - [A0A087WXM6_HUMAN]	28.4	16	5	5	5	75.71	28.4	5	5	169	19.5732	10.0376
Q9BQQ5	Ribosomal protein L27a OS=Homo sapiens OX=9606 GN=L27a PE=4 SV=1 - [Q9BQQ5_HUMAN]	28.3	5	3	3	3	51.06	28.3	3	3	106	12.0074	11.4585
P05141	ADP/ATP translocase 2 OS=Homo sapiens OX=9606 GN=SLC25A5 PE=1 SV=7 - [ADT2_HUMAN]	28.19	4	3	8	8	153.357	28.19	8	8	298	32.8312	9.68604
Q9Y2X3	Nucleolar protein 58 OS=Homo sapiens OX=9606 GN=NOP58 PE=1 SV=1 - [NOP58_HUMAN]	28.17	5	12	12	13	286.741	28.17	12	13	529	59.5405	8.92432
F8W6I7	Heterogeneous nuclear ribonucleoprotein A1 OS=Homo sapiens OX=9606 GN=HNRNPA1 PE=1 SV=2 - [F8W6I7_HUMAN]	28.01	17	5	7	13	297.678	28.01	7	12	307	33.1348	9.12939
Q59FA2	Splicing factor, arginine/serine-rich 1 (Splicing factor 2, alternate splicing factor) variant (Fragment) OS=Homo sapiens OX=9606 PE=2 SV=1 - [Q59FA2_HUMAN]	27.9	9	6	6	6	82.751	27.9	6	6	233	25.6088	9.01221
Q5S4N1	Uncharacterized protein (Fragment) OS=Homo sapiens OX=9606 PE=2 SV=1 - [Q5S4N1_HUMAN]	27.9	27	8	8	8	224.589	27.9	8	8	362	40.1621	7.88428
A8K0T9	F-actin-capping protein subunit alpha OS=Homo sapiens OX=9606 PE=2 SV=1 - [A8K0T9_HUMAN]	27.62	2	5	6	6	65.177	27.62	6	6	286	32.8883	5.69385
P68371	Tubulin beta-4B chain OS=Homo sapiens OX=9606 GN=TUBB4B PE=1 SV=1 - [TBB4B_HUMAN]	27.42	48	2	10	19	347.184	27.42	10	19	445	49.799	4.89404
A0PJ62	RPL14 protein (Fragment) OS=Homo sapiens OX=9606 GN=RPL14 PE=2 SV=1 - [A0PJ62_HUMAN]	27.42	7	3	3	3	76.45	27.42	3	3	124	14.6019	10.6235
P55769	NHP2-like protein 1 OS=Homo sapiens OX=9606 GN=SNU13 PE=1 SV=3 - [NH2L1_HUMAN]	27.34	4	3	3	3	48.55	27.34	3	3	128	14.1646	8.45557
S4R2Y4	Chromobox protein homolog 3 (Fragment) OS=Homo sapiens OX=9606 GN=CBX3 PE=1 SV=1 - [S4R2Y4_HUMAN]	27.1	2	1	1	1	21.98	27.1	1	1	107	12.3893	8.54346
Q9NZI8	Insulin-like growth factor 2 mRNA-binding protein 1 OS=Homo sapiens OX=9606 GN=IGF2BP1 PE=1 SV=2 - [IF2B1_HUMAN]	27.04	2	13	14	15	420.746	27.04	14	15	577	63.4412	9.20264
O75531	Barrier-to-autointegration factor OS=Homo sapiens OX=9606 GN=BANF1 PE=1 SV=1 - [BAF_HUMAN]	26.97	1	1	1	3	95.99	26.97	1	3	89	10.052	6.0874
B3KS36	cDNA FLJ35376 fis, clone SKMUS2004044, highly similar to Homo sapiens ribosomal protein L3 (RPL3), transcript variant 2, mRNA OS=Homo sapiens OX=9606 PE=2 SV=1 - [B3KS36_HUMAN]	26.84	13	8	8	8	181.059	26.84	8	8	354	40.1197	10.3013
Q9P134	PRO3078 OS=Homo sapiens OX=9606 PE=2 SV=1 - [Q9P134_HUMAN]	26.47	149	1	2	2	31.97	26.47	2	2	68	7.71686	7.07861
Q5XTR9	Hemoglobin delta-beta fusion protein (Fragment) OS=Homo sapiens OX=9606 GN=HBD/HBB PE=3 SV=1 - [Q5XTR9_HUMAN]	26.47	35	1	1	1	17.26	26.47	1	1	34	3.88188	5.61768
P25705	ATP synthase subunit alpha, mitochondrial OS=Homo sapiens OX=9606 GN=ATP5F1A PE=1 SV=1 - [ATPA_HUMAN]	26.22	7	10	10	14	291.725	26.22	10	14	553	59.7136	9.12939
J3QRN6	Unconventional myosin-Id OS=Homo sapiens OX=9606 GN=MYO1D PE=1 SV=1 - [J3QRN6_HUMAN]	26.12	9	20	20	21	390.237	26.12	20	21	961	111.219	9.39307
K7EM20	14-3-3 protein epsilon (Fragment) OS=Homo sapiens OX=9606 GN=YWHAE PE=1 SV=1 - [K7EM20_HUMAN]	26.09	6	2	2	2	47.86	26.09	2	2	115	12.8613	4.58936
A0A0K0K1I0	Epididymis secretory protein Li 265 OS=Homo sapiens OX=9606 GN=HEL-S-265 PE=2 SV=1 - [A0A0K0K1I0_HUMAN]	26.06	14	0	8	12	165.497	26.06	8	12	284	32.8457	4.76709
A0A386NC25	Cellular tumor antigen p53 OS=Homo sapiens OX=9606 GN=TP53 PE=2 SV=1 - [A0A386NC25_HUMAN]	25.57	168	8	8	9	144.056	25.57	8	9	305	33.7233	5.63037
H0YK48	Tropomyosin alpha-1 chain OS=Homo sapiens OX=9606 GN=TPM1 PE=1 SV=1 - [H0YK48_HUMAN]	25.4	9	1	7	11	177.107	25.4	7	11	248	28.5625	4.76709
Q562Z4	Actin-like protein (Fragment) OS=Homo sapiens OX=9606 GN=ACT PE=4 SV=1 - [Q562Z4_HUMAN]	25.24	4	1	2	6	70.5802	25.24	2	6	103	11.548	7.57666
J3QQQ9	Uncharacterized protein OS=Homo sapiens OX=9606 PE=4 SV=1 - [J3QQQ9_HUMAN]	25.23	11	3	3	3	43.64	25.23	3	3	107	12.6839	10.7847
P60866	40S ribosomal protein S20 OS=Homo sapiens OX=9606 GN=RPS20 PE=1 SV=1 - [RS20_HUMAN]	25.21	4	3	3	3	43.42	25.21	3	3	119	13.3643	9.93506
Q5QPM0	RNA-binding protein Raly (Fragment) OS=Homo sapiens OX=9606 GN=RALY PE=1 SV=8 - [Q5QPM0_HUMAN]	25.15	8	5	5	5	88.071	25.15	5	5	171	18.649	10.0229
A0A2R8YGX3	Tropomyosin alpha-4 chain OS=Homo sapiens OX=9606 GN=TPM4 PE=1 SV=1 - [A0A2R8YGX3_HUMAN]	25.14	24	3	5	6	74.22	25.14	5	6	183	20.9727	4.83057
E9PQD7	40S ribosomal protein S2 OS=Homo sapiens OX=9606 GN=RPS2 PE=1 SV=1 - [E9PQD7_HUMAN]	25.11	17	3	5	5	181.28	25.11	5	5	235	25.1952	10.2427
P42677	40S ribosomal protein S27 OS=Homo sapiens OX=9606 GN=RPS27 PE=1 SV=3 - [RS27_HUMAN]	25	6	2	2	2	35.61	25	2	2	84	9.45484	9.45166
P62269	40S ribosomal protein S18 OS=Homo sapiens OX=9606 GN=RPS18 PE=1 SV=3 - [RS18_HUMAN]	25	4	4	4	4	132.458	25	4	4	152	17.7079	10.9897
J3KMX5	40S ribosomal protein S13 OS=Homo sapiens OX=9606 GN=RPS13 PE=1 SV=1 - [J3KMX5_HUMAN]	25	3	3	3	3	79.1533	25	3	3	148	16.7223	10.5063
H0YLP6	60S ribosomal protein L28 OS=Homo sapiens OX=9606 GN=RPL28 PE=1 SV=1 - [H0YLP6_HUMAN]	24.72	5	2	2	2	69.88	24.72	2	2	89	9.65091	10.3599
E9PCY7	Heterogeneous nuclear ribonucleoprotein H OS=Homo sapiens OX=9606 GN=HNRNPH1 PE=1 SV=1 - [E9PCY7_HUMAN]	24.71	25	3	8	9	265.41	24.71	8	9	429	47.0574	6.34131
C9JUG7	F-actin-capping protein subunit alpha OS=Homo sapiens OX=9606 GN=CAPZA2 PE=1 SV=1 - [C9JUG7_HUMAN]	24.66	6	2	3	3	56.96	24.66	3	3	146	16.6883	5.10986
Q562L9	Actin-like protein (Fragment) OS=Homo sapiens OX=9606 GN=ACT PE=4 SV=1 - [Q562L9_HUMAN]	24.27	4	1	2	6	62.9902	24.27	2	6	103	11.5489	6.52197
P68104	Elongation factor 1-alpha 1 OS=Homo sapiens OX=9606 GN=EEF1A1 PE=1 SV=1 - [EF1A1_HUMAN]	24.24	43	8	8	15	265.715	24.24	8	14	462	50.1091	9.01221
B7Z597	cDNA FLJ54373, highly similar to 60 kDa heat shock protein, mitochondrial OS=Homo sapiens OX=9606 PE=2 SV=1 - [B7Z597_HUMAN]	24.11	15	11	11	12	221.882	24.11	11	12	564	60.0098	5.74463
P62280	40S ribosomal protein S11 OS=Homo sapiens OX=9606 GN=RPS11 PE=1 SV=3 - [RS11_HUMAN]	24.05	3	3	3	3	89.1767	24.05	3	3	158	18.419	10.3013
E9PLJ3	Cofilin-1 (Fragment) OS=Homo sapiens OX=9606 GN=CFL1 PE=1 SV=1 - [E9PLJ3_HUMAN]	24.05	9	2	2	2	71.13	24.05	2	2	79	9.08474	8.38232
O75367	Core histone macro-H2A.1 OS=Homo sapiens OX=9606 GN=H2AFY PE=1 SV=4 - [H2AY_HUMAN]	23.92	4	5	7	8	159.455	23.92	7	8	372	39.5925	9.78857
U5U7S7	Dyskeratosis congenita 1 isoform 5 OS=Homo sapiens OX=9606 PE=2 SV=1 - [U5U7S7_HUMAN]	23.9	6	2	2	2	16.01	23.9	2	2	159	18.0266	9.33447
P12956	X-ray repair cross-complementing protein 6 OS=Homo sapiens OX=9606 GN=XRCC6 PE=1 SV=2 - [XRCC6_HUMAN]	23.81	6	13	13	15	222.706	23.81	13	15	609	69.7991	6.63916
J3KN67	Tropomyosin alpha-3 chain OS=Homo sapiens OX=9606 GN=TPM3 PE=1 SV=1 - [J3KN67_HUMAN]	23.51	16	0	7	9	113.341	23.51	7	9	285	33.2018	4.76709
P12814	Alpha-actinin-1 OS=Homo sapiens OX=9606 GN=ACTN1 PE=1 SV=2 - [ACTN1_HUMAN]	23.09	32	8	18	19	378.376	23.09	18	19	892	102.993	5.41455
P18124	60S ribosomal protein L7 OS=Homo sapiens OX=9606 GN=RPL7 PE=1 SV=1 - [RL7_HUMAN]	22.58	6	6	6	6	114.73	22.58	6	6	248	29.2072	10.6528
P61026	Ras-related protein Rab-10 OS=Homo sapiens OX=9606 GN=RAB10 PE=1 SV=1 - [RAB10_HUMAN]	22.5	83	2	4	5	106.57	22.5	4	5	200	22.5266	8.38232
Q16643	Drebrin OS=Homo sapiens OX=9606 GN=DBN1 PE=1 SV=4 - [DREB_HUMAN]	22.5	8	12	12	14	185.297	22.5	12	14	649	71.3854	4.44971
B8ZZ51	Malate dehydrogenase, cytoplasmic OS=Homo sapiens OX=9606 GN=MDH1 PE=1 SV=1 - [B8ZZ51_HUMAN]	22.49	3	1	1	1	28.7	22.49	1	1	169	18.6775	5.93506
B3KM80	Nucleolin, isoform CRA_c OS=Homo sapiens OX=9606 GN=NCL PE=2 SV=1 - [B3KM80_HUMAN]	22.39	6	11	11	11	230.806	22.39	11	11	536	58.5193	4.66553
Q9NR30	Nucleolar RNA helicase 2 OS=Homo sapiens OX=9606 GN=DDX21 PE=1 SV=5 - [DDX21_HUMAN]	22.35	8	14	14	16	277.489	22.35	14	16	783	87.2904	9.27588
P36578	60S ribosomal protein L4 OS=Homo sapiens OX=9606 GN=RPL4 PE=1 SV=5 - [RL4_HUMAN]	22.25	10	8	8	8	195.234	22.25	8	8	427	47.6674	11.063
V9HW35	Peroxiredoxin OS=Homo sapiens OX=9606 GN=HEL-S-55 PE=2 SV=1 - [V9HW35_HUMAN]	22.22	2	3	3	3	36.8133	22.22	3	3	162	17.02	7.23975
Q5JRI1	Serine/arginine-rich-splicing factor 10 OS=Homo sapiens OX=9606 GN=SRSF10 PE=1 SV=1 - [Q5JRI1_HUMAN]	22.09	5	3	3	3	50.136	22.09	3	3	172	20.9005	10.4771
X1WI22	GTP-binding protein SAR1a (Fragment) OS=Homo sapiens OX=9606 GN=SAR1A PE=1 SV=7 - [X1WI22_HUMAN]	22	11	1	1	1	60.05	22	1	1	50	5.75306	9.24658
M0R3D6	60S ribosomal protein L18a (Fragment) OS=Homo sapiens OX=9606 GN=RPL18A PE=1 SV=1 - [M0R3D6_HUMAN]	21.99	12	3	3	3	105.26	21.99	3	3	141	16.7038	10.77
B4E3E6	cDNA FLJ58832, highly similar to Heterogeneous nuclear ribonucleoprotein A3 OS=Homo sapiens OX=9606 PE=2 SV=1 - [B4E3E6_HUMAN]	21.98	4	5	6	9	265.887	21.98	6	8	323	34.168	8.104
B4DY09	Interleukin enhancer-binding factor 2 OS=Homo sapiens OX=9606 GN=ILF2 PE=1 SV=1 - [B4DY09_HUMAN]	21.88	6	6	6	7	205.712	21.88	6	7	352	38.8862	4.94482
Q9BRL5	CALM3 protein OS=Homo sapiens OX=9606 PE=1 SV=1 - [Q9BRL5_HUMAN]	21.77	13	4	4	4	107	21.77	4	4	147	16.4959	4.4624
P16104	Histone H2AX OS=Homo sapiens OX=9606 GN=H2AFX PE=1 SV=2 - [H2AX_HUMAN]	21.68	7	1	4	8	130.295	21.68	4	8	143	15.1354	10.7407
A0A140T907	Flotillin-1 (Fragment) OS=Homo sapiens OX=9606 GN=FLOT1 PE=1 SV=1 - [A0A140T907_HUMAN]	21.67	9	1	1	1	58.77	21.67	1	1	60	7.09584	6.75635
D6RF44	Heterogeneous nuclear ribonucleoprotein D0 (Fragment) OS=Homo sapiens OX=9606 GN=HNRNPD PE=1 SV=8 - [D6RF44_HUMAN]	21.62	15	1	2	3	79.0833	21.62	2	3	111	12.5455	8.57275
C9J0D1	Histone H2A OS=Homo sapiens OX=9606 GN=H2AFV PE=1 SV=1 - [C9J0D1_HUMAN]	21.31	5	1	3	6	92.18	21.31	3	6	122	13.155	9.99365
Q9NSS8	U5 small nuclear ribonucleoprotein 40 kDa protein OS=Homo sapiens OX=9606 GN=SNRNP40 PE=1 SV=1 - [Q9NSS8_HUMAN]	21.26	3	1	1	1	25.62	21.26	1	1	127	14.2534	8.49951
H0YIC2	Methionine--tRNA ligase, cytoplasmic (Fragment) OS=Homo sapiens OX=9606 GN=MARS PE=1 SV=1 - [H0YIC2_HUMAN]	20.69	6	1	1	1	41.88	20.69	1	1	58	6.38985	4.65283
P06733	Alpha-enolase OS=Homo sapiens OX=9606 GN=ENO1 PE=1 SV=2 - [ENOA_HUMAN]	20.51	26	7	7	8	171.372	20.51	7	8	434	47.1393	7.38623
Q12906	Interleukin enhancer-binding factor 3 OS=Homo sapiens OX=9606 GN=ILF3 PE=1 SV=3 - [ILF3_HUMAN]	20.47	20	15	15	18	357.858	20.47	15	18	894	95.2791	8.76318
P38159	RNA-binding motif protein, X chromosome OS=Homo sapiens OX=9606 GN=RBMX PE=1 SV=3 - [RBMX_HUMAN]	20.46	14	8	8	9	164.638	20.46	8	9	391	42.3063	10.0522
B7Z5C0	cDNA FLJ52352, highly similar to DnaJ homolog subfamily A member 1 OS=Homo sapiens OX=9606 PE=2 SV=1 - [B7Z5C0_HUMAN]	20.42	3	3	3	3	52.0933	20.42	3	3	240	27.5258	5.93506
A8K964	cDNA FLJ75071, highly similar to Homo sapiens pinin, desmosome associated protein (PNN), mRNA OS=Homo sapiens OX=9606 PE=2 SV=1 - [A8K964_HUMAN]	20.22	6	12	12	13	168.082	20.22	12	13	717	81.4929	7.37158
P62314	Small nuclear ribonucleoprotein Sm D1 OS=Homo sapiens OX=9606 GN=SNRPD1 PE=1 SV=1 - [SMD1_HUMAN]	20.17	4	3	3	3	64.4833	20.17	3	3	119	13.2734	11.561
M0R210	40S ribosomal protein S16 OS=Homo sapiens OX=9606 GN=RPS16 PE=1 SV=1 - [M0R210_HUMAN]	20.16	6	3	3	3	73.4158	20.16	3	3	129	14.41	10.228
Q02878	60S ribosomal protein L6 OS=Homo sapiens OX=9606 GN=RPL6 PE=1 SV=3 - [RL6_HUMAN]	20.14	12	7	7	7	129.88	20.14	7	7	288	32.7076	10.5796
Q9Y3U8	60S ribosomal protein L36 OS=Homo sapiens OX=9606 GN=RPL36 PE=1 SV=3 - [RL36_HUMAN]	20	2	2	2	2	97.94	20	2	2	105	12.2459	11.5903
P18085	ADP-ribosylation factor 4 OS=Homo sapiens OX=9606 GN=ARF4 PE=1 SV=3 - [ARF4_HUMAN]	20	9	3	4	4	105.934	20	4	4	180	20.4977	7.13721
P38117	Electron transfer flavoprotein subunit beta OS=Homo sapiens OX=9606 GN=ETFB PE=1 SV=3 - [ETFB_HUMAN]	20	2	5	5	5	133.382	20	5	5	255	27.8262	8.104
A0A087WVZ4	Cytochrome b-c1 complex subunit 2, mitochondrial (Fragment) OS=Homo sapiens OX=9606 GN=UQCRC2 PE=1 SV=1 - [A0A087WVZ4_HUMAN]	20	7	1	1	1	29.11	20	1	1	70	7.64496	9.42236
F6RFD5	Destrin OS=Homo sapiens OX=9606 GN=DSTN PE=1 SV=1 - [F6RFD5_HUMAN]	20	3	2	2	2	72.69	20	2	2	135	15.3869	8.5874
B4DXW1	Actin-related protein 3 OS=Homo sapiens OX=9606 GN=ACTR3 PE=1 SV=1 - [B4DXW1_HUMAN]	19.89	11	5	5	5	82.9492	19.89	5	5	367	41.9773	5.61768
Q5TEC6	Histone H3 OS=Homo sapiens OX=9606 GN=HIST2H3PS2 PE=1 SV=1 - [Q5TEC6_HUMAN]	19.85	3	1	3	4	65.7109	19.85	3	4	136	15.4206	11.2681
P12236	ADP/ATP translocase 3 OS=Homo sapiens OX=9606 GN=SLC25A6 PE=1 SV=4 - [ADT3_HUMAN]	19.8	4	1	6	6	102.82	19.8	6	6	298	32.8452	9.74463
P16403	Histone H1.2 OS=Homo sapiens OX=9606 GN=HIST1H1C PE=1 SV=2 - [H12_HUMAN]	19.72	9	5	5	8	181.686	19.72	5	8	213	21.3517	10.9312
P14649	Myosin light chain 6B OS=Homo sapiens OX=9606 GN=MYL6B PE=1 SV=1 - [MYL6B_HUMAN]	19.71	3	2	4	5	134.198	19.71	4	5	208	22.7497	5.73193
D6RFX4	Receptor of-activated protein C kinase 1 (Fragment) OS=Homo sapiens OX=9606 GN=RACK1 PE=1 SV=1 - [D6RFX4_HUMAN]	19.59	20	3	3	3	87.74	19.59	3	3	194	21.4356	7.81104
P54886	Delta-1-pyrroline-5-carboxylate synthase OS=Homo sapiens OX=9606 GN=ALDH18A1 PE=1 SV=2 - [P5CS_HUMAN]	19.5	1	14	14	14	242.394	19.5	14	14	795	87.2475	7.12256
Q86V81	THO complex subunit 4 OS=Homo sapiens OX=9606 GN=ALYREF PE=1 SV=3 - [THOC4_HUMAN]	19.46	2	3	3	3	30.91	19.46	3	3	257	26.8716	11.1509
H0Y4R1	Inosine-5'-monophosphate dehydrogenase 2 (Fragment) OS=Homo sapiens OX=9606 GN=IMPDH2 PE=1 SV=1 - [H0Y4R1_HUMAN]	19.36	7	7	7	7	151.704	19.36	7	7	470	51.0352	8.17725
Q9P0M6	Core histone macro-H2A.2 OS=Homo sapiens OX=9606 GN=H2AFY2 PE=1 SV=3 - [H2AW_HUMAN]	19.35	3	4	6	7	143.341	19.35	6	7	372	40.0334	9.68604
I3L397	Eukaryotic translation initiation factor 5A (Fragment) OS=Homo sapiens OX=9606 GN=EIF5A PE=1 SV=8 - [I3L397_HUMAN]	19.18	8	3	3	4	101.029	19.18	3	4	146	16.0089	4.99561
Q96C19	EF-hand domain-containing protein D2 OS=Homo sapiens OX=9606 GN=EFHD2 PE=1 SV=1 - [EFHD2_HUMAN]	19.17	9	4	4	4	56.1067	19.17	4	4	240	26.6805	5.19873
G3V1N2	HCG1745306, isoform CRA_a OS=Homo sapiens OX=9606 GN=HBA2 PE=1 SV=1 - [G3V1N2_HUMAN]	19.09	30	2	2	4	60.9216	19.09	2	3	110	11.9402	8.76318
Q0VGL3	RPL13A protein OS=Homo sapiens OX=9606 GN=RPL13A PE=2 SV=1 - [Q0VGL3_HUMAN]	19.01	8	3	3	4	44.68	19.01	3	4	142	16.7064	10.814
P38919	Eukaryotic initiation factor 4A-III OS=Homo sapiens OX=9606 GN=EIF4A3 PE=1 SV=4 - [IF4A3_HUMAN]	18.98	2	7	8	9	120.225	18.98	8	9	411	46.8412	6.72705
B4DKS8	cDNA FLJ57121, highly similar to Heterogeneous nuclear ribonucleoprotein F OS=Homo sapiens OX=9606 PE=2 SV=1 - [B4DKS8_HUMAN]	18.93	4	3	5	5	126.11	18.93	5	5	338	37.2318	6.04932
Q1JQ76	Ribosomal protein (Fragment) OS=Homo sapiens OX=9606 GN=RPL10A PE=2 SV=1 - [Q1JQ76_HUMAN]	18.93	3	3	3	4	59.6966	18.93	3	4	206	23.5209	10.0669
H7C086	ATP synthase subunit O, mitochondrial (Fragment) OS=Homo sapiens OX=9606 GN=ATP5PO PE=4 SV=1 - [H7C086_HUMAN]	18.92	4	1	1	1	30.45	18.92	1	1	74	8.12737	9.78857
P13804	Electron transfer flavoprotein subunit alpha, mitochondrial OS=Homo sapiens OX=9606 GN=ETFA PE=1 SV=1 - [ETFA_HUMAN]	18.92	8	5	5	6	111.93	18.92	5	5	333	35.0576	8.38232
B3KVA7	cDNA FLJ16309 fis, clone SKMUS2007816, highly similar to Creatine kinase, sarcomeric mitochondrial OS=Homo sapiens OX=9606 PE=2 SV=1 - [B3KVA7_HUMAN]	18.82	6	4	4	7	129.047	18.82	4	7	356	40.4537	7.44482
P55795	Heterogeneous nuclear ribonucleoprotein H2 OS=Homo sapiens OX=9606 GN=HNRNPH2 PE=1 SV=1 - [HNRH2_HUMAN]	18.71	3	2	6	8	190.767	18.71	6	8	449	49.2323	6.30322
E9PDF6	Unconventional myosin-Ib OS=Homo sapiens OX=9606 GN=MYO1B PE=1 SV=1 - [E9PDF6_HUMAN]	18.61	15	17	17	17	274.457	18.61	17	17	1107	128.4	9.30518
H3BV80	RNA-binding protein with serine-rich domain 1 OS=Homo sapiens OX=9606 GN=RNPS1 PE=1 SV=2 - [H3BV80_HUMAN]	18.48	7	2	2	3	83.11	18.48	2	3	211	24.5461	11.8979
B4DRD7	cDNA FLJ54752, highly similar to Poly(rC)-binding protein 2 OS=Homo sapiens OX=9606 PE=2 SV=1 - [B4DRD7_HUMAN]	18.44	17	3	4	4	93.6767	18.44	4	4	282	29.7182	7.7085
M0R0P1	rRNA 2'-O-methyltransferase fibrillarin (Fragment) OS=Homo sapiens OX=9606 GN=FBL PE=1 SV=1 - [M0R0P1_HUMAN]	18.42	10	4	4	5	102.808	18.42	4	5	228	24.5288	10.1108
Q9BSD7	Cancer-related nucleoside-triphosphatase OS=Homo sapiens OX=9606 GN=NTPCR PE=1 SV=1 - [NTPCR_HUMAN]	18.42	2	3	3	3	96.22	18.42	3	3	190	20.7001	9.53955
Q66K47	FCF1 protein OS=Homo sapiens OX=9606 GN=FCF1 PE=2 SV=1 - [Q66K47_HUMAN]	18.35	5	2	2	2	53.27	18.35	2	2	109	12.8025	8.89502
A0A2R8Y623	40S ribosomal protein S7 (Fragment) OS=Homo sapiens OX=9606 GN=RPS7 PE=1 SV=1 - [A0A2R8Y623_HUMAN]	18.34	4	2	2	2	52.13	18.34	2	2	169	19.3937	10.0962
B4DMB1	cDNA FLJ53358, highly similar to Heterogeneous nuclear ribonucleoprotein R OS=Homo sapiens OX=9606 PE=2 SV=1 - [B4DMB1_HUMAN]	18.32	9	8	9	9	167.93	18.32	9	9	595	66.9663	8.29443
O15235	28S ribosomal protein S12, mitochondrial OS=Homo sapiens OX=9606 GN=MRPS12 PE=1 SV=1 - [RT12_HUMAN]	18.12	1	1	1	1	0	18.12	1	1	138	15.163	10.2866
P11177	Pyruvate dehydrogenase E1 component subunit beta, mitochondrial OS=Homo sapiens OX=9606 GN=PDHB PE=1 SV=3 - [ODPB_HUMAN]	18.11	4	5	5	5	180.452	18.11	5	5	359	39.208	6.65381
Q7KZ24	Nuclease sensitive element binding protein-1 OS=Homo sapiens OX=9606 PE=2 SV=1 - [Q7KZ24_HUMAN]	18.01	14	4	4	4	147.32	18.01	4	4	322	34.65	7.53271
J3QSV6	Ribosomal L1 domain-containing protein 1 (Fragment) OS=Homo sapiens OX=9606 GN=RSL1D1 PE=1 SV=1 - [J3QSV6_HUMAN]	17.91	9	7	7	7	153.113	17.91	7	7	430	48.1791	10.0229
L8EC67	Alternative protein DGKK OS=Homo sapiens OX=9606 GN=DGKK PE=4 SV=1 - [L8EC67_HUMAN]	17.86	1	1	1	2	0	17.86	1	2	56	6.47917	8.88037
P61326	Protein mago nashi homolog OS=Homo sapiens OX=9606 GN=MAGOH PE=1 SV=1 - [MGN_HUMAN]	17.81	4	2	2	2	40.92	17.81	2	2	146	17.1528	6.11279
C9J7S3	Aspartate--tRNA ligase, cytoplasmic (Fragment) OS=Homo sapiens OX=9606 GN=DARS PE=1 SV=8 - [C9J7S3_HUMAN]	17.71	7	2	2	2	59.06	17.71	2	2	175	19.8555	8.646
F8WDD7	Actin-related protein 2/3 complex subunit 4 OS=Homo sapiens OX=9606 GN=ARPC4 PE=4 SV=1 - [F8WDD7_HUMAN]	17.7	7	2	2	2	47.55	17.7	2	2	113	13.049	9.51025
H0YHC3	Nucleosome assembly protein 1-like 1 (Fragment) OS=Homo sapiens OX=9606 GN=NAP1L1 PE=1 SV=1 - [H0YHC3_HUMAN]	17.68	18	2	2	2	83.77	17.68	2	2	198	23.4028	4.80518
D6R9P3	Heterogeneous nuclear ribonucleoprotein A/B OS=Homo sapiens OX=9606 GN=HNRNPAB PE=1 SV=1 - [D6R9P3_HUMAN]	17.5	11	3	4	5	120.88	17.5	4	5	280	30.284	7.91357
K7ENX8	Cold-inducible RNA-binding protein (Fragment) OS=Homo sapiens OX=9606 GN=CIRBP PE=1 SV=2 - [K7ENX8_HUMAN]	17.5	13	1	1	1	45.01	17.5	1	1	80	8.90833	4.80518
Q13584	Isocitrate dehydrogenase [NADP] OS=Homo sapiens OX=9606 PE=2 SV=1 - [Q13584_HUMAN]	17.42	5	5	5	6	94.73	17.42	5	6	419	46.7853	7.1958
Q5T6W2	Heterogeneous nuclear ribonucleoprotein K (Fragment) OS=Homo sapiens OX=9606 GN=HNRNPK PE=1 SV=1 - [Q5T6W2_HUMAN]	17.41	9	5	5	5	132.01	17.41	5	5	379	41.7807	5.59229
P62424	60S ribosomal protein L7a OS=Homo sapiens OX=9606 GN=RPL7A PE=1 SV=2 - [RL7A_HUMAN]	17.29	4	4	4	5	164.123	17.29	4	5	266	29.977	10.6089
D3YTB1	60S ribosomal protein L32 (Fragment) OS=Homo sapiens OX=9606 GN=RPL32 PE=1 SV=1 - [D3YTB1_HUMAN]	17.29	3	2	2	2	51.72	17.29	2	2	133	15.6067	11.4438
E7EX53	Ribosomal protein L15 (Fragment) OS=Homo sapiens OX=9606 GN=RPL15 PE=1 SV=1 - [E7EX53_HUMAN]	17.29	9	3	3	4	76.6705	17.29	3	4	133	15.7125	11.0044
Q08211	ATP-dependent RNA helicase A OS=Homo sapiens OX=9606 GN=DHX9 PE=1 SV=4 - [DHX9_HUMAN]	17.01	4	19	19	23	356.656	16.06	18	22	1270	140.869	6.84424
A0A087X122	RNA-binding protein 39 (Fragment) OS=Homo sapiens OX=9606 GN=RBM39 PE=1 SV=1 - [A0A087X122_HUMAN]	16.95	16	1	1	1	46.98	16.95	1	1	59	6.0641	5.0083
I3L2G1	Vesicle-fusing ATPase (Fragment) OS=Homo sapiens OX=9606 GN=NSF PE=1 SV=1 - [I3L2G1_HUMAN]	16.91	11	2	2	2	53.51	16.91	2	2	136	15.2063	9.02686
Q96BA7	HNRPU protein OS=Homo sapiens OX=9606 PE=2 SV=1 - [Q96BA7_HUMAN]	16.9	19	10	10	11	137.099	16.9	10	11	722	79.6658	7.86963
A0A3G2LMJ8	CD59 blood group antigen (Fragment) OS=Homo sapiens OX=9606 GN=CD59 PE=4 SV=1 - [A0A3G2LMJ8_HUMAN]	16.9	8	1	1	2	43.03	16.9	1	2	71	8.29704	6.49365
Q05CK9	SYNCRIP protein (Fragment) OS=Homo sapiens OX=9606 GN=SYNCRIP PE=2 SV=1 - [Q05CK9_HUMAN]	16.78	7	5	6	6	89.1704	16.78	6	6	453	50.6189	6.7124
E9PLA2	Rho-related GTP-binding protein RhoC OS=Homo sapiens OX=9606 GN=RHOC PE=4 SV=1 - [E9PLA2_HUMAN]	16.67	15	1	1	1	46.92	16.67	1	1	66	7.26273	4.89404
Q5T7C4	High mobility group protein B1 OS=Homo sapiens OX=9606 GN=HMGB1 PE=1 SV=1 - [Q5T7C4_HUMAN]	16.46	8	2	2	2	46.11	16.46	2	2	158	18.2993	9.70068
D6RD47	40S ribosomal protein S23 OS=Homo sapiens OX=9606 GN=RPS23 PE=1 SV=1 - [D6RD47_HUMAN]	16.42	5	2	2	3	31.65	16.42	2	3	134	14.8279	10.228
B4DL14	ATP synthase subunit gamma OS=Homo sapiens OX=9606 PE=2 SV=1 - [B4DL14_HUMAN]	16.4	4	4	4	5	102.18	16.4	4	5	250	27.4953	7.41553
F8WBS5	60S ribosomal protein L35a OS=Homo sapiens OX=9606 GN=RPL35A PE=1 SV=1 - [F8WBS5_HUMAN]	16.36	4	1	1	1	32.83	16.36	1	1	55	6.46844	9.99365
Q96HS1	Serine/threonine-protein phosphatase PGAM5, mitochondrial OS=Homo sapiens OX=9606 GN=PGAM5 PE=1 SV=2 - [PGAM5_HUMAN]	16.26	5	5	5	5	100.935	16.26	5	5	289	31.9846	8.67529
B7ZAY2	cDNA, FLJ79346, highly similar to Ras-related protein Rap-1b OS=Homo sapiens OX=9606 PE=2 SV=1 - [B7ZAY2_HUMAN]	16.2	24	2	2	2	46.1265	16.2	2	2	142	15.9793	9.0708
M0R0F0	40S ribosomal protein S5 (Fragment) OS=Homo sapiens OX=9606 GN=RPS5 PE=1 SV=1 - [M0R0F0_HUMAN]	16	6	3	3	4	154.977	16	3	4	200	22.3768	9.5542
C9J9K3	40S ribosomal protein SA (Fragment) OS=Homo sapiens OX=9606 GN=RPSA PE=1 SV=8 - [C9J9K3_HUMAN]	15.97	6	3	3	3	57.83	15.97	3	3	263	29.386	5.24951
B5BUB1	RuvB-like helicase (Fragment) OS=Homo sapiens OX=9606 GN=RUVBL1 PE=2 SV=1 - [B5BUB1_HUMAN]	15.79	6	5	5	5	117.067	15.79	5	5	456	50.1843	6.41748
E9PJL9	NADH dehydrogenase [ubiquinone] flavoprotein 1, mitochondrial (Fragment) OS=Homo sapiens OX=9606 GN=NDUFV1 PE=1 SV=8 - [E9PJL9_HUMAN]	15.79	10	1	1	1	46.98	15.79	1	1	95	10.4341	5.90967
F8WBY0	GTP-binding protein 10 OS=Homo sapiens OX=9606 GN=GTPBP10 PE=1 SV=1 - [F8WBY0_HUMAN]	15.71	7	1	1	1	26.11	15.71	1	1	70	7.75809	11.2827
Q9Y5B9	FACT complex subunit SPT16 OS=Homo sapiens OX=9606 GN=SUPT16H PE=1 SV=1 - [SP16H_HUMAN]	15.66	2	13	13	14	223.65	15.66	13	14	1047	119.838	5.65576
Q8N1H4	cDNA FLJ40872 fis, clone TUTER2000283, highly similar to Homo sapiens transformer-2-beta (SFRS10) gene OS=Homo sapiens OX=9606 PE=2 SV=1 - [Q8N1H4_HUMAN]	15.48	6	2	3	3	108.567	15.48	3	3	252	29.1832	10.6528
P42766	60S ribosomal protein L35 OS=Homo sapiens OX=9606 GN=RPL35 PE=1 SV=2 - [RL35_HUMAN]	15.45	3	2	2	3	39.73	15.45	2	3	123	14.5426	11.0483
P14618	Pyruvate kinase PKM OS=Homo sapiens OX=9606 GN=PKM PE=1 SV=4 - [KPYM_HUMAN]	15.44	20	6	6	6	79.7567	15.44	6	6	531	57.9	7.84033
A8K787	cDNA FLJ75273, highly similar to Homo sapiens solute carrier family 25 (mitochondrial carrier; adenine nucleotide translocator), member 4, mRNA OS=Homo sapiens OX=9606 PE=2 SV=1 - [A8K787_HUMAN]	15.44	7	1	5	5	80.26	15.44	5	5	298	33.0592	9.75928
A4FS09	Minichromosome maintenance protein 4 (Fragment) OS=Homo sapiens OX=9606 GN=MCM4 PE=2 SV=1 - [A4FS09_HUMAN]	15.29	10	1	1	1	0	15.29	1	1	85	9.42114	8.44092
P62851	40S ribosomal protein S25 OS=Homo sapiens OX=9606 GN=RPS25 PE=1 SV=1 - [RS25_HUMAN]	15.2	1	2	2	2	89.78	15.2	2	2	125	13.7337	10.1108
P83881	60S ribosomal protein L36a OS=Homo sapiens OX=9606 GN=RPL36A PE=1 SV=2 - [RL36A_HUMAN]	15.09	7	1	2	2	48.73	15.09	2	2	106	12.4328	10.5796
B2R4V2	cDNA, FLJ92227, highly similar to Homo sapiens ribosomal protein L36a-like (RPL36AL), mRNA OS=Homo sapiens OX=9606 PE=2 SV=1 - [B2R4V2_HUMAN]	15.09	3	1	2	2	34.78	15.09	2	2	106	12.5189	10.6528
Q6E433	Activated RNA polymerase II transcription cofactor 4 (Fragment) OS=Homo sapiens OX=9606 PE=2 SV=1 - [Q6E433_HUMAN]	15.07	3	1	1	1	59.87	15.07	1	1	73	8.64939	8.44092
Q8IWR8	Ribosomal protein L19 (Fragment) OS=Homo sapiens OX=9606 PE=2 SV=1 - [Q8IWR8_HUMAN]	15.03	5	2	2	2	118.79	15.03	2	2	173	20.8068	11.4438
Q6FIG4	RAB1B protein OS=Homo sapiens OX=9606 GN=RAB1B PE=2 SV=1 - [Q6FIG4_HUMAN]	14.93	89	1	3	4	72.1567	14.93	3	4	201	22.1842	5.73193
P26373	60S ribosomal protein L13 OS=Homo sapiens OX=9606 GN=RPL13 PE=1 SV=4 - [RL13_HUMAN]	14.69	6	3	3	3	88.7167	14.69	3	3	211	24.2465	11.6489
B4DW08	cDNA FLJ50886, highly similar to Aconitate hydratase, mitochondrial OS=Homo sapiens OX=9606 PE=2 SV=1 - [B4DW08_HUMAN]	14.66	11	3	3	5	123.398	14.66	3	5	491	54.425	7.62061
F5H018	GTP-binding nuclear protein Ran (Fragment) OS=Homo sapiens OX=9606 GN=RAN PE=1 SV=8 - [F5H018_HUMAN]	14.65	6	3	3	3	64.75	14.65	3	3	198	22.4217	8.73389
B4DN41	cDNA FLJ53366, highly similar to Probable ATP-dependent RNA helicase DDX5 OS=Homo sapiens OX=9606 PE=2 SV=1 - [B4DN41_HUMAN]	14.59	15	7	9	10	171.571	14.59	9	10	603	67.72	8.86572
A0A024R2Z6	Guanine nucleotide binding protein-like 3 (Nucleolar), isoform CRA_b OS=Homo sapiens OX=9606 GN=GNL3 PE=4 SV=1 - [A0A024R2Z6_HUMAN]	14.53	2	6	6	6	169.357	14.53	6	6	537	60.5345	8.79248
Q05CM9	PSIP1 protein (Fragment) OS=Homo sapiens OX=9606 GN=PSIP1 PE=2 SV=1 - [Q05CM9_HUMAN]	14.45	3	3	3	3	50.13	14.45	3	3	263	29.6524	9.39307
O60382	KIAA0324 (Fragment) OS=Homo sapiens OX=9606 GN=KIAA0324 PE=4 SV=1 - [O60382_HUMAN]	14.41	4	19	19	22	331.116	14.41	19	22	1791	191.193	11.9272
A8K800	cDNA FLJ76924, highly similar to Homo sapiens brix domain containing 1 (BXDC1), mRNA OS=Homo sapiens OX=9606 PE=2 SV=1 - [A8K800_HUMAN]	14.38	4	4	4	4	48.05	14.38	4	4	306	35.5502	9.99365
G3V1A1	60S ribosomal protein L8 OS=Homo sapiens OX=9606 GN=RPL8 PE=1 SV=1 - [G3V1A1_HUMAN]	14.37	5	2	2	2	34.08	14.37	2	2	167	18.1579	10.5649
A0M8Q9	C1 segment protein (Fragment) OS=Homo sapiens OX=9606 GN=C1 segment PE=4 SV=1 - [A0M8Q9_HUMAN]	14.29	36	1	1	1	0	14.29	1	1	105	11.2836	7.86963
K7EPJ3	ATP-dependent RNA helicase DDX39A (Fragment) OS=Homo sapiens OX=9606 GN=DDX39A PE=1 SV=1 - [K7EPJ3_HUMAN]	14.29	46	3	3	3	74.9096	14.29	3	3	189	21.3468	6.04932
B2RAX6	cDNA, FLJ95176, Homo sapiens CGI-48 protein (CGI-48), mRNA OS=Homo sapiens OX=9606 PE=2 SV=1 - [B2RAX6_HUMAN]	14.2	6	6	6	6	130.47	14.2	6	6	521	57.6711	7.45947
A8K651	cDNA FLJ75700, highly similar to Homo sapiens complement component 1, q subcomponent binding protein (C1QBP), nuclear gene encoding mitochondrial protein, mRNA OS=Homo sapiens OX=9606 PE=2 SV=1 - [A8K651_HUMAN]	14.18	4	2	2	2	56.03	14.18	2	2	282	31.3606	4.84326
Q6DKI1	60S ribosomal protein L7-like 1 OS=Homo sapiens OX=9606 GN=RPL7L1 PE=1 SV=2 - [RL7L_HUMAN]	14.12	5	3	3	3	45.0973	14.12	3	3	255	29.6506	10.521
Q15717	ELAV-like protein 1 OS=Homo sapiens OX=9606 GN=ELAVL1 PE=1 SV=2 - [ELAV1_HUMAN]	14.11	3	4	4	4	133.778	14.11	4	4	326	36.0692	9.17334
Q562R1	Beta-actin-like protein 2 OS=Homo sapiens OX=9606 GN=ACTBL2 PE=1 SV=2 - [ACTBL_HUMAN]	14.1	5	1	4	20	285.199	14.1	4	20	376	41.976	5.59229
P62753	40S ribosomal protein S6 OS=Homo sapiens OX=9606 GN=RPS6 PE=1 SV=1 - [RS6_HUMAN]	14.06	5	3	3	4	140.4	14.06	3	4	249	28.663	10.8433
P17096	High mobility group protein HMG-I/HMG-Y OS=Homo sapiens OX=9606 GN=HMGA1 PE=1 SV=3 - [HMGA1_HUMAN]	14.02	3	1	1	1	28.48	14.02	1	1	107	11.6691	10.3159
Q59HE2	Ornithine aminotransferase variant (Fragment) OS=Homo sapiens OX=9606 PE=2 SV=1 - [Q59HE2_HUMAN]	13.88	2	3	3	4	88.3271	13.88	3	4	281	30.717	4.84326
P31942	Heterogeneous nuclear ribonucleoprotein H3 OS=Homo sapiens OX=9606 GN=HNRNPH3 PE=1 SV=2 - [HNRH3_HUMAN]	13.87	4	4	4	4	76.2133	13.87	4	4	346	36.9031	6.87354
A0A024R9E2	Poly(A) binding protein, cytoplasmic 1, isoform CRA_c OS=Homo sapiens OX=9606 GN=PABPC1 PE=4 SV=1 - [A0A024R9E2_HUMAN]	13.84	21	5	6	6	111.779	13.84	6	6	419	47.3048	8.92432
P82921	28S ribosomal protein S21, mitochondrial OS=Homo sapiens OX=9606 GN=MRPS21 PE=1 SV=3 - [RT21_HUMAN]	13.79	1	1	1	1	48	13.79	1	1	87	10.6814	9.92041
G5E9R3	60S ribosomal protein L37a OS=Homo sapiens OX=9606 GN=RPL37A PE=1 SV=1 - [G5E9R3_HUMAN]	13.79	8	1	1	1	0	13.79	1	1	58	6.56355	10.4478
Q8N4P8	GTPBP4 protein (Fragment) OS=Homo sapiens OX=9606 GN=GTPBP4 PE=2 SV=1 - [Q8N4P8_HUMAN]	13.77	6	8	8	8	95.2889	13.77	8	8	632	73.6628	9.5542
O00422	Histone deacetylase complex subunit SAP18 OS=Homo sapiens OX=9606 GN=SAP18 PE=1 SV=1 - [SAP18_HUMAN]	13.73	3	2	2	3	41.9533	13.73	2	3	153	17.55	9.34912
B4DEN9	Ribosome biogenesis protein BOP1 OS=Homo sapiens OX=9606 GN=BOP1 PE=2 SV=1 - [B4DEN9_HUMAN]	13.72	7	7	7	7	133.573	13.72	7	7	634	71.873	8.17725
P49207	60S ribosomal protein L34 OS=Homo sapiens OX=9606 GN=RPL34 PE=1 SV=3 - [RL34_HUMAN]	13.68	1	2	2	2	40.16	13.68	2	2	117	13.2845	11.4731
A0A087X270	Replication factor C subunit 3 (Fragment) OS=Homo sapiens OX=9606 GN=RFC3 PE=1 SV=1 - [A0A087X270_HUMAN]	13.59	4	1	1	1	44.19	13.59	1	1	103	11.941	5.92236
P49916	DNA ligase 3 OS=Homo sapiens OX=9606 GN=LIG3 PE=1 SV=2 - [DNLI3_HUMAN]	13.58	6	13	13	13	241.244	13.58	13	13	1009	112.835	9.01221
E4W6B6	RPL27/NME2 fusion protein (Fragment) OS=Homo sapiens OX=9606 GN=RPL27 PE=2 SV=1 - [E4W6B6_HUMAN]	13.49	6	2	2	2	66.43	13.49	2	2	126	14.248	10.4624
B2R4D5	Actin-related protein 2/3 complex subunit 3 OS=Homo sapiens OX=9606 PE=2 SV=1 - [B2R4D5_HUMAN]	13.48	6	2	2	2	64.2	13.48	2	2	178	20.5073	8.5874
A0A2R8Y6J3	60S ribosomal protein L5 (Fragment) OS=Homo sapiens OX=9606 GN=RPL5 PE=1 SV=1 - [A0A2R8Y6J3_HUMAN]	13.45	4	3	3	4	23.74	13.45	3	4	238	27.0277	9.12939
B4DFQ8	cDNA FLJ52225, moderately similar to S-adenosylmethionine synthetase isoform type-2 OS=Homo sapiens OX=9606 PE=2 SV=1 - [B4DFQ8_HUMAN]	13.41	7	1	1	1	0	13.41	1	1	82	9.1889	9.30518
M0QYT0	Uncharacterized protein (Fragment) OS=Homo sapiens OX=9606 PE=4 SV=1 - [M0QYT0_HUMAN]	13.4	8	3	3	3	31.9533	13.4	3	3	321	35.9916	7.41553
P12277	Creatine kinase B-type OS=Homo sapiens OX=9606 GN=CKB PE=1 SV=1 - [KCRB_HUMAN]	13.39	5	4	4	5	139.34	13.39	4	5	381	42.6173	5.59229
B4DMT8	cDNA FLJ52118, highly similar to 14-3-3 protein theta OS=Homo sapiens OX=9606 PE=2 SV=1 - [B4DMT8_HUMAN]	13.33	18	1	3	3	41.21	13.33	3	3	210	23.8219	4.88135
G5E9E9	Deoxythymidylate kinase (Thymidylate kinase), isoform CRA_d OS=Homo sapiens OX=9606 GN=DTYMK PE=1 SV=1 - [G5E9E9_HUMAN]	13.25	2	1	1	1	0	13.25	1	1	83	9.28395	9.37842
Q15185	Prostaglandin E synthase 3 OS=Homo sapiens OX=9606 GN=PTGES3 PE=1 SV=1 - [TEBP_HUMAN]	13.13	4	2	2	2	37.06	13.13	2	2	160	18.6854	4.53857
B7Z2F4	T-complex protein 1 subunit delta OS=Homo sapiens OX=9606 PE=2 SV=1 - [B7Z2F4_HUMAN]	13.11	5	4	4	4	92.7467	13.11	4	4	389	42.2726	7.60596
J3QL05	Serine/arginine-rich-splicing factor 2 (Fragment) OS=Homo sapiens OX=9606 GN=SRSF2 PE=1 SV=1 - [J3QL05_HUMAN]	13.08	6	1	1	1	76.66	13.08	1	1	130	15.1466	10.9604
O15144	Actin-related protein 2/3 complex subunit 2 OS=Homo sapiens OX=9606 GN=ARPC2 PE=1 SV=1 - [ARPC2_HUMAN]	13	7	4	4	5	66.57	13	4	5	300	34.3115	7.35693
B5BU08	U2 small nuclear RNA auxillary factor 1 isoform a OS=Homo sapiens OX=9606 GN=U2AF1 PE=2 SV=1 - [B5BU08_HUMAN]	12.92	3	2	2	2	87.55	12.92	2	2	240	27.8554	8.54346
P25398	40S ribosomal protein S12 OS=Homo sapiens OX=9606 GN=RPS12 PE=1 SV=3 - [RS12_HUMAN]	12.88	1	2	2	2	50.05	12.88	2	2	132	14.5055	7.21045
Q13243	Serine/arginine-rich splicing factor 5 OS=Homo sapiens OX=9606 GN=SRSF5 PE=1 SV=1 - [SRSF5_HUMAN]	12.87	8	2	3	3	67.78	12.87	3	3	272	31.2453	11.5903
E5RK82	Centrin-3 OS=Homo sapiens OX=9606 GN=CETN3 PE=1 SV=1 - [E5RK82_HUMAN]	12.82	4	2	2	2	40.98	12.82	2	2	156	18.3253	4.90674
A6NLN1	Polypyrimidine tract binding protein 1, isoform CRA_b OS=Homo sapiens OX=9606 GN=PTBP1 PE=1 SV=4 - [A6NLN1_HUMAN]	12.71	18	5	5	5	87.668	12.71	5	5	527	56.4753	9.37842
C5J0G2	Serpina 1 (Fragment) OS=Homo sapiens OX=9606 PE=3 SV=1 - [C5J0G2_HUMAN]	12.7	5	1	1	1	30.68	12.7	1	1	63	6.96667	8.54346
J7HBC9	Retinoic acid early transcript 1H (Fragment) OS=Homo sapiens OX=9606 GN=RAET1H PE=4 SV=1 - [J7HBC9_HUMAN]	12.64	5	1	1	1	25.23	12.64	1	1	87	9.88716	8.30908
B5BU24	14-3-3 protein beta/alpha OS=Homo sapiens OX=9606 GN=YWHAB PE=2 SV=1 - [B5BU24_HUMAN]	12.6	20	1	3	3	0	12.6	3	3	246	28.0948	4.83057
A0A087WVM4	Monofunctional C1-tetrahydrofolate synthase, mitochondrial OS=Homo sapiens OX=9606 GN=MTHFD1L PE=1 SV=1 - [A0A087WVM4_HUMAN]	12.6	10	9	9	9	134.653	12.6	9	9	913	99.2493	7.26904
Q5VVC8	60S ribosomal protein L11 OS=Homo sapiens OX=9606 GN=RPL11 PE=1 SV=2 - [Q5VVC8_HUMAN]	12.57	3	2	2	2	35.32	12.57	2	2	167	19.0121	9.80322
B4DRH6	cDNA FLJ54509, highly similar to Trifunctional enzyme subunit alpha, mitochondrial OS=Homo sapiens OX=9606 PE=2 SV=1 - [B4DRH6_HUMAN]	12.55	7	6	6	6	65.77	12.55	6	6	717	78.2653	8.92432
A0JLQ5	BXDC2 protein (Fragment) OS=Homo sapiens OX=9606 GN=BXDC2 PE=2 SV=1 - [A0JLQ5_HUMAN]	12.54	4	4	4	4	50.627	12.54	4	4	335	39.1449	9.90576
P10599	Thioredoxin OS=Homo sapiens OX=9606 GN=TXN PE=1 SV=3 - [THIO_HUMAN]	12.38	1	1	1	1	33.16	12.38	1	1	105	11.7297	4.91943
B4DT61	Syndecan OS=Homo sapiens OX=9606 PE=2 SV=1 - [B4DT61_HUMAN]	12.35	6	1	1	1	48.7	12.35	1	1	81	9.11671	6.03662
B3KX11	T-complex protein 1 subunit gamma OS=Homo sapiens OX=9606 PE=2 SV=1 - [B3KX11_HUMAN]	12.26	11	6	6	6	128.525	12.26	6	6	522	57.909	6.93213
B7Z3E5	cDNA FLJ53573, highly similar to Myosin Ic OS=Homo sapiens OX=9606 PE=2 SV=1 - [B7Z3E5_HUMAN]	12.22	9	2	10	11	237.71	12.22	10	11	1039	118.982	9.40771
C9JG32	Elongation factor Ts, mitochondrial (Fragment) OS=Homo sapiens OX=9606 GN=TSFM PE=1 SV=1 - [C9JG32_HUMAN]	12.14	6	1	1	1	68.5	12.14	1	1	140	15.431	8.89502
B4DJE7	cDNA FLJ52595, highly similar to Medium-chain specific acyl-CoA dehydrogenase, mitochondrial OS=Homo sapiens OX=9606 PE=2 SV=1 - [B4DJE7_HUMAN]	12.07	10	2	2	2	47.04	12.07	2	2	232	25.6472	8.99756
D3DTH7	Myosin IC, isoform CRA_a OS=Homo sapiens OX=9606 GN=MYO1C PE=3 SV=1 - [D3DTH7_HUMAN]	12.06	2	1	9	10	197.006	12.06	9	10	862	98.8722	9.42236
Q15050	Ribosome biogenesis regulatory protein homolog OS=Homo sapiens OX=9606 GN=RRS1 PE=1 SV=2 - [RRS1_HUMAN]	12.05	1	3	3	3	132.107	12.05	3	3	365	41.1682	10.6968
U3KQP3	NADH dehydrogenase [ubiquinone] 1 alpha subcomplex subunit 13 (Fragment) OS=Homo sapiens OX=9606 GN=NDUFA13 PE=4 SV=2 - [U3KQP3_HUMAN]	12	6	1	1	1	30.6	12	1	1	75	8.70253	9.979
F8WBJ6	RNA-binding protein PNO1 OS=Homo sapiens OX=9606 GN=PNO1 PE=1 SV=1 - [F8WBJ6_HUMAN]	11.76	3	1	1	1	25.59	11.76	1	1	136	15.1659	9.81787
B4E0S6	cDNA FLJ55635, highly similar to pre-mRNA-splicing factorATP-dependent RNA helicase DHX15 OS=Homo sapiens OX=9606 PE=2 SV=1 - [B4E0S6_HUMAN]	11.73	14	9	9	9	183.681	11.73	9	9	784	89.4906	7.45947
H0YG82	28S ribosomal protein S35, mitochondrial (Fragment) OS=Homo sapiens OX=9606 GN=MRPS35 PE=1 SV=1 - [H0YG82_HUMAN]	11.73	2	1	1	1	41.65	11.73	1	1	162	18.0094	9.26123
H0YA24	Pleiotropic regulator 1 (Fragment) OS=Homo sapiens OX=9606 GN=PLRG1 PE=1 SV=1 - [H0YA24_HUMAN]	11.54	2	1	1	1	0	11.54	1	1	156	17.3591	9.53955
Q5U071	High-mobility group box 2 OS=Homo sapiens OX=9606 PE=2 SV=1 - [Q5U071_HUMAN]	11.54	3	2	2	2	92.2	11.54	2	2	208	23.8897	8.1333
Q9Y5S9	RNA-binding protein 8A OS=Homo sapiens OX=9606 GN=RBM8A PE=1 SV=1 - [RBM8A_HUMAN]	11.49	2	2	2	3	27.66	11.49	2	3	174	19.8767	5.71924
B8ZZK4	60S ribosomal protein L31 OS=Homo sapiens OX=9606 GN=RPL31 PE=1 SV=1 - [B8ZZK4_HUMAN]	11.39	7	1	1	1	39.75	11.39	1	1	79	8.98201	10.8872
B1AH48	Thiosulfate sulfurtransferase (Fragment) OS=Homo sapiens OX=9606 GN=TST PE=1 SV=1 - [B1AH48_HUMAN]	11.29	4	1	1	1	0	11.29	1	1	124	14.2271	7.60596
F8VU34	Citrate synthase, mitochondrial (Fragment) OS=Homo sapiens OX=9606 GN=CS PE=1 SV=1 - [F8VU34_HUMAN]	11.27	7	1	1	2	51.33	11.27	1	2	142	15.5471	8.74854
Q8N254	RNA helicase OS=Homo sapiens OX=9606 PE=2 SV=1 - [Q8N254_HUMAN]	11.27	5	4	4	4	109.781	11.27	4	4	408	46.6144	9.36377
R4GN43	NADH dehydrogenase [ubiquinone] 1 alpha subcomplex subunit 6 OS=Homo sapiens OX=9606 GN=NDUFA6 PE=1 SV=1 - [R4GN43_HUMAN]	11.27	3	1	1	1	53.25	11.27	1	1	71	8.50446	9.46631
A4UCS6	Peroxiredoxin 6 (Fragment) OS=Homo sapiens OX=9606 PE=2 SV=1 - [A4UCS6_HUMAN]	11.25	2	1	1	1	44.65	11.25	1	1	80	9.00878	5.14795
P63316	Troponin C, slow skeletal and cardiac muscles OS=Homo sapiens OX=9606 GN=TNNC1 PE=1 SV=1 - [TNNC1_HUMAN]	11.18	1	1	1	1	0	11.18	1	1	161	18.3905	4.18311
F8WB66	Splicing factor 3A subunit 1 OS=Homo sapiens OX=9606 GN=SF3A1 PE=1 SV=1 - [F8WB66_HUMAN]	11.11	2	1	1	1	40.14	11.11	1	1	63	6.61143	4.89404
A6NL93	Non-histone chromosomal protein HMG-14 OS=Homo sapiens OX=9606 GN=HMGN1 PE=1 SV=1 - [A6NL93_HUMAN]	11.11	6	1	1	1	34.72	11.11	1	1	90	9.52992	9.0708
Q53G19	Mitochondrial ribosomal protein L11 isoform a variant (Fragment) OS=Homo sapiens OX=9606 PE=2 SV=1 - [Q53G19_HUMAN]	10.94	2	2	2	2	53.79	10.94	2	2	192	20.6424	9.90576
P31151	Protein S100-A7 OS=Homo sapiens OX=9606 GN=S100A7 PE=1 SV=4 - [S10A7_HUMAN]	10.89	1	1	1	1	27.06	10.89	1	1	101	11.4636	6.771
B3KMB7	Pyrroline-5-carboxylate reductase family, member 2, isoform CRA_a OS=Homo sapiens OX=9606 GN=PYCR2 PE=2 SV=1 - [B3KMB7_HUMAN]	10.85	17	2	2	2	75.327	10.85	2	2	212	22.2735	6.18896
Q59GY3	Arginine/serine-rich splicing factor 6 variant (Fragment) OS=Homo sapiens OX=9606 PE=2 SV=1 - [Q59GY3_HUMAN]	10.75	5	1	3	3	73.26	10.75	3	3	279	31.8461	10.9458
Q15365	Poly(rC)-binding protein 1 OS=Homo sapiens OX=9606 GN=PCBP1 PE=1 SV=2 - [PCBP1_HUMAN]	10.67	2	2	3	3	90.4433	10.67	3	3	356	37.4739	7.09326
E9PPH5	Acidic leucine-rich nuclear phosphoprotein 32 family member E (Fragment) OS=Homo sapiens OX=9606 GN=ANP32E PE=1 SV=1 - [E9PPH5_HUMAN]	10.53	3	1	1	1	36.24	10.53	1	1	114	13.1204	4.22119
H0YJH9	Polyadenylate-binding protein 2 (Fragment) OS=Homo sapiens OX=9606 GN=PABPN1 PE=1 SV=1 - [H0YJH9_HUMAN]	10.42	4	1	1	1	53.2	10.42	1	1	96	11.0747	11.2681
B4DDF5	DNA replication licensing factor MCM7 OS=Homo sapiens OX=9606 GN=MCM7 PE=2 SV=1 - [B4DDF5_HUMAN]	10.38	7	6	6	6	93.68	10.38	6	6	655	73.6827	7.82568
Q9NV06	DDB1- and CUL4-associated factor 13 OS=Homo sapiens OX=9606 GN=DCAF13 PE=1 SV=2 - [DCA13_HUMAN]	10.34	5	4	4	4	77.1467	10.34	4	4	445	51.3692	9.18799
A0A384MDW7	Enoyl Coenzyme A hydratase, short chain, 1, mitochondrial OS=Homo sapiens OX=9606 GN=ECHS1 PE=2 SV=1 - [A0A384MDW7_HUMAN]	10.34	2	2	2	2	83.02	10.34	2	2	290	31.3792	8.07471
B4DNF8	cDNA FLJ57403, moderately similar to Creatine kinase M-type OS=Homo sapiens OX=9606 PE=2 SV=1 - [B4DNF8_HUMAN]	10.32	4	1	1	3	96.53	10.32	1	2	126	14.1151	4.85596
H0YMU3	Isocitrate dehydrogenase [NAD] subunit alpha, mitochondrial (Fragment) OS=Homo sapiens OX=9606 GN=IDH3A PE=1 SV=1 - [H0YMU3_HUMAN]	10.29	7	2	2	2	66.1569	10.29	2	2	175	19.235	9.46631
Q9NZ48	Uncharacterized hematopoietic stem/progenitor cells protein MDS026 OS=Homo sapiens OX=9606 PE=2 SV=1 - [Q9NZ48_HUMAN]	10.22	9	1	1	1	52.95	10.22	1	1	137	14.9853	7.86963
H7BXY3	ATP-dependent RNA helicase DHX30 OS=Homo sapiens OX=9606 GN=DHX30 PE=1 SV=1 - [H7BXY3_HUMAN]	10.12	3	10	10	10	171.512	10.12	10	10	1166	130.469	8.55811
Q8IXJ3	Small nuclear ribonucleoprotein component OS=Homo sapiens OX=9606 GN=SNRP116 PE=2 SV=1 - [Q8IXJ3_HUMAN]	10	9	6	7	7	87.7157	10	7	7	850	95.311	6.02393
J3KNP2	Transducin beta-like protein 3 (Fragment) OS=Homo sapiens OX=9606 GN=TBL3 PE=1 SV=1 - [J3KNP2_HUMAN]	9.9	4	4	4	4	77.51	9.9	4	4	697	77.0415	7.07861
Q53HB9	DEAD (Asp-Glu-Ala-Asp) box polypeptide 56 variant (Fragment) OS=Homo sapiens OX=9606 PE=2 SV=1 - [Q53HB9_HUMAN]	9.87	6	5	5	5	80.36	9.87	5	5	547	61.5269	9.26123
F8VQ14	T-complex protein 1 subunit beta OS=Homo sapiens OX=9606 GN=CCT2 PE=1 SV=1 - [F8VQ14_HUMAN]	9.86	4	3	3	3	65.6794	9.86	3	3	416	44.7846	6.53662
Q0QF37	Malate dehydrogenase (Fragment) OS=Homo sapiens OX=9606 GN=MDH2 PE=2 SV=1 - [Q0QF37_HUMAN]	9.84	6	2	2	2	62.8258	9.84	2	2	305	31.9488	7.88428
E5KSX8	Mitochondrial transcription factor A OS=Homo sapiens OX=9606 PE=4 SV=1 - [E5KSX8_HUMAN]	9.76	4	2	2	2	67.4549	9.76	2	2	246	29.0922	9.71533
H0Y2W2	ATPase family AAA domain-containing protein 3A (Fragment) OS=Homo sapiens OX=9606 GN=ATAD3A PE=1 SV=1 - [H0Y2W2_HUMAN]	9.62	8	5	5	5	96.9613	9.62	5	5	572	64.3143	9.43701
Q08945	FACT complex subunit SSRP1 OS=Homo sapiens OX=9606 GN=SSRP1 PE=1 SV=1 - [SSRP1_HUMAN]	9.59	4	6	6	7	211.716	9.59	6	7	709	81.0244	6.87354
V9GYC9	28S ribosomal protein S29, mitochondrial (Fragment) OS=Homo sapiens OX=9606 GN=DAP3 PE=1 SV=1 - [V9GYC9_HUMAN]	9.57	8	1	1	1	29.61	9.57	1	1	115	12.6699	10.1255
P13639	Elongation factor 2 OS=Homo sapiens OX=9606 GN=EEF2 PE=1 SV=4 - [EF2_HUMAN]	9.56	8	7	8	8	121.983	9.56	8	8	858	95.277	6.82959
Q96GA3	Protein LTV1 homolog OS=Homo sapiens OX=9606 GN=LTV1 PE=1 SV=1 - [LTV1_HUMAN]	9.47	3	5	5	5	136.53	9.47	5	5	475	54.8212	4.90674
Q8N1B9	NADH dehydrogenase (Ubiquinone) 1 alpha subcomplex, 10, 42kDa, isoform CRA_c OS=Homo sapiens OX=9606 GN=NDUFA10 PE=1 SV=1 - [Q8N1B9_HUMAN]	9.45	9	1	1	1	22.99	9.45	1	1	201	22.3594	8.90967
P63104	14-3-3 protein zeta/delta OS=Homo sapiens OX=9606 GN=YWHAZ PE=1 SV=1 - [1433Z_HUMAN]	9.39	12	1	2	2	46.77	9.39	2	2	245	27.7277	4.79248
Q9H444	Charged multivesicular body protein 4b OS=Homo sapiens OX=9606 GN=CHMP4B PE=1 SV=1 - [CHM4B_HUMAN]	9.38	1	2	2	2	79.8038	9.38	2	2	224	24.9346	4.81787
P62306	Small nuclear ribonucleoprotein F OS=Homo sapiens OX=9606 GN=SNRPF PE=1 SV=1 - [RUXF_HUMAN]	9.3	1	1	1	1	16.12	9.3	1	1	86	9.71878	4.66553
Q7Z554	Troponin T cardiac isoform OS=Homo sapiens OX=9606 GN=TNNT2 PE=1 SV=1 - [Q7Z554_HUMAN]	9.29	21	2	2	2	28.34	9.29	2	2	226	27.5126	9.86182
F8VVM2	Phosphate carrier protein, mitochondrial OS=Homo sapiens OX=9606 GN=SLC25A3 PE=1 SV=1 - [F8VVM2_HUMAN]	9.26	9	3	3	3	36.87	9.26	3	3	324	36.1376	9.26123
A0A0D9SG53	Four and a half LIM domains protein 1 (Fragment) OS=Homo sapiens OX=9606 GN=FHL1 PE=1 SV=1 - [A0A0D9SG53_HUMAN]	9.23	18	1	1	1	35.19	9.23	1	1	130	15.005	8.25049
Q9GZL7	Ribosome biogenesis protein WDR12 OS=Homo sapiens OX=9606 GN=WDR12 PE=1 SV=2 - [WDR12_HUMAN]	9.22	2	3	3	3	57.01	9.22	3	3	423	47.6777	5.89697
M0R3F1	Heterogeneous nuclear ribonucleoprotein U-like protein 1 (Fragment) OS=Homo sapiens OX=9606 GN=HNRNPUL1 PE=1 SV=1 - [M0R3F1_HUMAN]	9.2	12	6	6	6	102.039	9.2	6	6	641	71.677	8.98291
Q8NBL6	cDNA PSEC0127 fis, clone PLACE1003724, highly similar to Mitochondrial 28S ribosomal protein S22 OS=Homo sapiens OX=9606 PE=2 SV=1 - [Q8NBL6_HUMAN]	9.17	9	2	2	2	32.9748	9.17	2	2	218	25.1233	9.45166
B4DYP6	cDNA FLJ57094, highly similar to Probable ATP-dependent RNA helicase DDX47 (EC3.6.1.-) OS=Homo sapiens OX=9606 PE=2 SV=1 - [B4DYP6_HUMAN]	9.09	5	1	1	1	49.37	9.09	1	1	132	14.0723	4.64014
P17987	T-complex protein 1 subunit alpha OS=Homo sapiens OX=9606 GN=TCP1 PE=1 SV=1 - [TCPA_HUMAN]	8.99	9	5	5	5	66.6387	8.99	5	5	556	60.3056	6.11279
P30048	Thioredoxin-dependent peroxide reductase, mitochondrial OS=Homo sapiens OX=9606 GN=PRDX3 PE=1 SV=3 - [PRDX3_HUMAN]	8.98	2	2	2	3	48.76	8.98	2	3	256	27.6752	7.78174
P61160	Actin-related protein 2 OS=Homo sapiens OX=9606 GN=ACTR2 PE=1 SV=1 - [ARP2_HUMAN]	8.88	7	3	3	4	108.91	8.88	3	4	394	44.7322	6.7417
Q5HYL6	Uncharacterized protein DKFZp686E1899 OS=Homo sapiens OX=9606 GN=DKFZp686E1899 PE=2 SV=1 - [Q5HYL6_HUMAN]	8.81	4	3	3	3	94.0997	8.81	3	3	352	39.5302	5.18604
C9JLU1	DNA-directed RNA polymerases I, II, and III subunit RPABC3 (Fragment) OS=Homo sapiens OX=9606 GN=POLR2H PE=1 SV=8 - [C9JLU1_HUMAN]	8.78	2	1	1	1	29.31	8.78	1	1	148	16.9143	4.67822
A6NP16	Angiomotin OS=Homo sapiens OX=9606 GN=AMOT PE=1 SV=1 - [A6NP16_HUMAN]	8.71	5	5	5	5	134.79	8.71	5	5	597	68.3504	8.06006
P11388	DNA topoisomerase 2-alpha OS=Homo sapiens OX=9606 GN=TOP2A PE=1 SV=3 - [TOP2A_HUMAN]	8.69	1	8	11	11	147.736	8.69	11	11	1531	174.276	8.71924
A0PJ56	MAK16 protein (Fragment) OS=Homo sapiens OX=9606 GN=MAK16 PE=2 SV=1 - [A0PJ56_HUMAN]	8.66	3	1	1	1	41.14	8.66	1	1	127	15.3751	9.93506
A6NJH9	Eukaryotic translation initiation factor 1A, Y-chromosomal OS=Homo sapiens OX=9606 GN=EIF1AY PE=1 SV=1 - [A6NJH9_HUMAN]	8.66	3	1	1	1	32.51	8.66	1	1	127	14.4462	5.33838
K7EJ44	Profilin OS=Homo sapiens OX=9606 GN=PFN1 PE=1 SV=1 - [K7EJ44_HUMAN]	8.65	2	1	1	1	35.07	8.65	1	1	104	11.3828	9.17334
Q86YZ3	Hornerin OS=Homo sapiens OX=9606 GN=HRNR PE=1 SV=2 - [HORN_HUMAN]	8.6	1	5	5	5	92.1432	8.6	5	5	2850	282.228	10.0376
H7C5P4	Replication factor C subunit 2 (Fragment) OS=Homo sapiens OX=9606 GN=RFC2 PE=1 SV=1 - [H7C5P4_HUMAN]	8.59	5	2	2	2	66.4	8.59	2	2	198	22.5733	6.93213
Q5JP02	Histone-binding protein RBBP7 (Fragment) OS=Homo sapiens OX=9606 GN=RBBP7 PE=1 SV=1 - [Q5JP02_HUMAN]	8.57	12	2	2	2	60.67	8.57	2	2	175	19.5117	5.14795
Q9UMS4	Pre-mRNA-processing factor 19 OS=Homo sapiens OX=9606 GN=PRPF19 PE=1 SV=1 - [PRP19_HUMAN]	8.53	2	3	3	3	36.6733	8.53	3	3	504	55.1463	6.60986
K7ENG2	U2 snRNP auxiliary factor large subunit OS=Homo sapiens OX=9606 GN=U2AF2 PE=1 SV=1 - [K7ENG2_HUMAN]	8.47	3	2	2	2	45.49	8.47	2	2	307	33.8799	5.03369
O15143	Actin-related protein 2/3 complex subunit 1B OS=Homo sapiens OX=9606 GN=ARPC1B PE=1 SV=3 - [ARC1B_HUMAN]	8.33	3	1	2	2	44.78	8.33	2	2	372	40.9234	8.35303
Q9NY12	H/ACA ribonucleoprotein complex subunit 1 OS=Homo sapiens OX=9606 GN=GAR1 PE=1 SV=1 - [GAR1_HUMAN]	8.29	1	1	1	1	0	8.29	1	1	217	22.3342	10.9165
A0A096LNH5	Glutamine amidotransferase-like class 1 domain-containing protein 3B, mitochondrial OS=Homo sapiens OX=9606 GN=GATD3B PE=1 SV=1 - [A0A096LNH5_HUMAN]	8.24	7	1	1	1	38.16	8.24	1	1	182	19.4041	7.82568
C9IZL7	Non-POU domain-containing octamer-binding protein (Fragment) OS=Homo sapiens OX=9606 GN=NONO PE=1 SV=1 - [C9IZL7_HUMAN]	8.21	11	2	2	2	72.4723	8.21	2	2	207	23.6583	9.80322
D6RDA2	Protein DEK (Fragment) OS=Homo sapiens OX=9606 GN=DEK PE=1 SV=1 - [D6RDA2_HUMAN]	8.2	5	1	1	1	43.34	8.2	1	1	122	14.1476	9.94971
Q9BYG3	MKI67 FHA domain-interacting nucleolar phosphoprotein OS=Homo sapiens OX=9606 GN=NIFK PE=1 SV=1 - [MK67I_HUMAN]	8.19	5	2	2	2	70.6363	8.19	2	2	293	34.201	9.87646
Q9UNX4	WD repeat-containing protein 3 OS=Homo sapiens OX=9606 GN=WDR3 PE=1 SV=1 - [WDR3_HUMAN]	8.17	3	8	8	8	101.921	8.17	8	8	943	106.032	6.63916
Q13595	Transformer-2 protein homolog alpha OS=Homo sapiens OX=9606 GN=TRA2A PE=1 SV=1 - [TRA2A_HUMAN]	8.16	1	1	2	2	53.8533	8.16	2	2	282	32.6691	11.2681
C9JXZ7	Replication factor C subunit 4 (Fragment) OS=Homo sapiens OX=9606 GN=RFC4 PE=1 SV=1 - [C9JXZ7_HUMAN]	8.13	5	1	1	1	37.39	8.13	1	1	123	13.3322	9.26123
H0YLS6	Proteasome subunit alpha type OS=Homo sapiens OX=9606 GN=PSMA4 PE=1 SV=1 - [H0YLS6_HUMAN]	8	9	1	1	1	31.2	8	1	1	125	13.9389	7.23975
A8K7D9	Importin subunit alpha OS=Homo sapiens OX=9606 PE=2 SV=1 - [A8K7D9_HUMAN]	7.94	5	3	3	3	56.416	7.94	3	3	529	57.7979	5.40186
A0A0D9SEM4	Serine/arginine-rich-splicing factor 4 (Fragment) OS=Homo sapiens OX=9606 GN=SRSF4 PE=1 SV=1 - [A0A0D9SEM4_HUMAN]	7.94	6	1	3	3	51.44	7.94	3	3	378	43.6217	11.0776
P50402	Emerin OS=Homo sapiens OX=9606 GN=EMD PE=1 SV=1 - [EMD_HUMAN]	7.87	2	2	2	2	49.36	7.87	2	2	254	28.9759	5.50342
B3KRK2	DEAD (Asp-Glu-Ala-Asp) box polypeptide 41, isoform CRA_a OS=Homo sapiens OX=9606 GN=DDX41 PE=2 SV=1 - [B3KRK2_HUMAN]	7.86	7	4	4	4	45.6782	7.86	4	4	496	55.3737	8.17725
B4DPI9	cDNA FLJ54985, highly similar to Nucleolar GTP-binding protein 2 OS=Homo sapiens OX=9606 PE=2 SV=1 - [B4DPI9_HUMAN]	7.81	2	1	1	1	40.04	7.81	1	1	192	21.6544	9.05615
C9JW69	Regulator of chromosome condensation (Fragment) OS=Homo sapiens OX=9606 GN=RCC1 PE=1 SV=1 - [C9JW69_HUMAN]	7.8	8	2	2	2	59.7528	7.8	2	2	372	39.5589	8.36768
P13010	X-ray repair cross-complementing protein 5 OS=Homo sapiens OX=9606 GN=XRCC5 PE=1 SV=3 - [XRCC5_HUMAN]	7.79	4	5	5	5	177.62	7.79	5	5	732	82.6523	5.80811
E9PMI6	Methylosome subunit pICln OS=Homo sapiens OX=9606 GN=CLNS1A PE=1 SV=1 - [E9PMI6_HUMAN]	7.78	4	1	1	1	29.3	7.78	1	1	167	18.2477	4.41162
B4YAH7	ALDH2 (Fragment) OS=Homo sapiens OX=9606 GN=ALDH2 PE=3 SV=1 - [B4YAH7_HUMAN]	7.69	17	1	2	2	51.6	7.69	2	2	247	26.5594	5.89697
S4R3W9	39S ribosomal protein L19, mitochondrial (Fragment) OS=Homo sapiens OX=9606 GN=MRPL19 PE=1 SV=1 - [S4R3W9_HUMAN]	7.69	5	1	1	1	39.28	7.69	1	1	143	16.5929	9.51025
B4DUA2	cDNA FLJ50224, highly similar to Proliferating cell nuclear antigen OS=Homo sapiens OX=9606 PE=2 SV=1 - [B4DUA2_HUMAN]	7.64	4	1	1	1	33.56	7.64	1	1	144	16.0472	7.78174
B3KVL5	Zinc finger CCHC domain-containing protein 10 OS=Homo sapiens OX=9606 GN=ZCCHC10 PE=1 SV=1 - [B3KVL5_HUMAN]	7.53	2	1	1	1	31.23	7.53	1	1	186	20.2958	7.88428
F8WE65	Peptidyl-prolyl cis-trans isomerase OS=Homo sapiens OX=9606 GN=PPIA PE=1 SV=1 - [F8WE65_HUMAN]	7.5	7	1	1	1	52.83	7.5	1	1	120	13.0133	6.771
B4DRW5	cDNA FLJ60028, highly similar to Sodium/potassium-transporting ATPase alpha-2 chain OS=Homo sapiens OX=9606 PE=2 SV=1 - [B4DRW5_HUMAN]	7.49	24	1	1	1	37.02	7.49	1	1	307	35.0503	8.66064
A0A1W2PNV4	Uncharacterized protein OS=Homo sapiens OX=9606 PE=4 SV=1 - [A0A1W2PNV4_HUMAN]	7.46	8	3	4	4	68.22	7.46	4	4	684	75.8248	8.5874
B4DSR0	cDNA FLJ60080, highly similar to 130 kDa leucine-rich protein (LRP 130) (Fragment) OS=Homo sapiens OX=9606 PE=2 SV=1 - [B4DSR0_HUMAN]	7.45	5	7	7	8	149.046	7.45	7	8	1087	123.168	5.5415
B4DHM5	Phosphoglycerate kinase OS=Homo sapiens OX=9606 PE=2 SV=1 - [B4DHM5_HUMAN]	7.44	4	1	1	1	17.05	7.44	1	1	242	25.6602	5.78271
Q5QJE6	Deoxynucleotidyltransferase terminal-interacting protein 2 OS=Homo sapiens OX=9606 GN=DNTTIP2 PE=1 SV=2 - [TDIF2_HUMAN]	7.41	3	5	5	6	137.37	7.41	5	6	756	84.4179	6.16357
M0R2I3	Transcription intermediary factor 1-beta (Fragment) OS=Homo sapiens OX=9606 GN=TRIM28 PE=1 SV=1 - [M0R2I3_HUMAN]	7.41	4	1	1	1	0	7.41	1	1	162	18.0863	6.26514
E5RJR5	S-phase kinase-associated protein 1 OS=Homo sapiens OX=9606 GN=SKP1 PE=1 SV=1 - [E5RJR5_HUMAN]	7.36	2	1	1	1	45.5	7.36	1	1	163	18.7083	4.70361
B4E138	cDNA FLJ50940, highly similar to PHD finger protein 6 OS=Homo sapiens OX=9606 PE=2 SV=1 - [B4E138_HUMAN]	7.32	4	1	1	1	0	7.32	1	1	123	14.0378	7.6792
A5YPB6	PDHA1 (Fragment) OS=Homo sapiens OX=9606 GN=PDHA1 PE=2 SV=1 - [A5YPB6_HUMAN]	7.28	11	2	2	2	85.4685	7.28	2	2	261	28.7612	6.23975
A0A1X7SBZ2	Probable ATP-dependent RNA helicase DDX17 OS=Homo sapiens OX=9606 GN=DDX17 PE=1 SV=1 - [A0A1X7SBZ2_HUMAN]	7.27	5	3	5	5	95.5254	7.27	5	5	729	80.2041	8.26514
K7EKW9	Flotillin-2 (Fragment) OS=Homo sapiens OX=9606 GN=FLOT2 PE=1 SV=1 - [K7EKW9_HUMAN]	7.23	6	2	2	2	34.75	7.23	2	2	249	27.9526	4.90674
H0YIZ0	Serine hydroxymethyltransferase, mitochondrial (Fragment) OS=Homo sapiens OX=9606 GN=SHMT2 PE=1 SV=1 - [H0YIZ0_HUMAN]	7.2	14	2	2	2	49.09	7.2	2	2	264	28.7992	9.43701
B1ANR0	Polyadenylate-binding protein OS=Homo sapiens OX=9606 GN=PABPC4 PE=1 SV=1 - [B1ANR0_HUMAN]	7.15	16	3	4	4	89.15	7.15	4	4	615	67.9279	9.45166
B2RE34	cDNA, FLJ96901, highly similar to Homo sapiens Rac GTPase activating protein 1 (RACGAP1), mRNA OS=Homo sapiens OX=9606 PE=2 SV=1 - [B2RE34_HUMAN]	7.12	19	5	5	5	79.8	7.12	5	5	632	70.9238	8.95361
Q92522	Histone H1x OS=Homo sapiens OX=9606 GN=H1FX PE=1 SV=1 - [H1X_HUMAN]	7.04	1	1	1	1	33.19	7.04	1	1	213	22.4735	10.7554
U3KQ50	Threonine--tRNA ligase, mitochondrial (Fragment) OS=Homo sapiens OX=9606 GN=TARS2 PE=1 SV=1 - [U3KQ50_HUMAN]	6.99	4	1	1	1	39.12	6.99	1	1	143	15.4018	5.07178
D6REM6	Matrin-3 OS=Homo sapiens OX=9606 GN=MATR3 PE=1 SV=1 - [D6REM6_HUMAN]	6.8	16	5	5	5	86.9778	6.8	5	5	794	88.3045	5.75732
B3KX32	cDNA FLJ44601 fis, clone BLADE2007799, highly similar to U3 small nucleolar RNA-associated protein 6 homolog OS=Homo sapiens OX=9606 PE=2 SV=1 - [B3KX32_HUMAN]	6.78	4	3	3	3	55.9567	6.78	3	3	413	48.0351	5.80811
Q7L0Y3	tRNA methyltransferase 10 homolog C OS=Homo sapiens OX=9606 GN=TRMT10C PE=1 SV=2 - [TM10C_HUMAN]	6.7	2	2	2	2	65.74	6.7	2	2	403	47.3166	9.36377
G3V3B0	Apoptotic chromatin condensation inducer in the nucleus OS=Homo sapiens OX=9606 GN=ACIN1 PE=1 SV=1 - [G3V3B0_HUMAN]	6.7	6	4	4	4	96.6512	6.7	4	4	582	67.4545	7.59131
Q9H9J7	cDNA FLJ12692 fis, clone NT2RM4002623, weakly similar to ASPARTYL-TRNA SYNTHETASE OS=Homo sapiens OX=9606 PE=2 SV=1 - [Q9H9J7_HUMAN]	6.7	11	3	3	4	107.854	6.7	3	4	463	52.606	6.59521
A0A0A0MRM8	Unconventional myosin-VI OS=Homo sapiens OX=9606 GN=MYO6 PE=1 SV=1 - [A0A0A0MRM8_HUMAN]	6.7	7	8	8	8	135.641	6.7	8	8	1253	144.924	8.55811
B4E043	KH domain containing, RNA binding, signal transduction associated 1, isoform CRA_b OS=Homo sapiens OX=9606 GN=KHDRBS1 PE=2 SV=1 - [B4E043_HUMAN]	6.63	7	2	2	2	37.4924	6.63	2	2	347	38.6583	6.46826
Q6PJX3	STAU1 protein (Fragment) OS=Homo sapiens OX=9606 GN=STAU1 PE=2 SV=1 - [Q6PJX3_HUMAN]	6.63	8	1	1	1	59.31	6.63	1	1	196	22.179	9.96436
Q13151	Heterogeneous nuclear ribonucleoprotein A0 OS=Homo sapiens OX=9606 GN=HNRNPA0 PE=1 SV=1 - [ROA0_HUMAN]	6.56	1	1	2	3	69.3389	6.56	2	3	305	30.8218	9.29053
Q0QF12	Succinate dehydrogenase (quinone) (Fragment) OS=Homo sapiens OX=9606 GN=SDHA PE=2 SV=1 - [Q0QF12_HUMAN]	6.55	7	2	2	2	86.91	6.55	2	2	550	60.0127	6.87354
Q9BSE8	ZNF607 protein OS=Homo sapiens OX=9606 GN=ZNF607 PE=2 SV=1 - [Q9BSE8_HUMAN]	6.41	9	1	1	1	21.09	6.41	1	1	156	16.9087	5.47803
O75533	Splicing factor 3B subunit 1 OS=Homo sapiens OX=9606 GN=SF3B1 PE=1 SV=3 - [SF3B1_HUMAN]	6.37	5	7	7	7	100.367	6.37	7	7	1304	145.738	7.09326
P98179	RNA-binding protein 3 OS=Homo sapiens OX=9606 GN=RBM3 PE=1 SV=1 - [RBM3_HUMAN]	6.37	1	1	1	1	43.38	6.37	1	1	157	17.16	8.90967
Q8TED0	U3 small nucleolar RNA-associated protein 15 homolog OS=Homo sapiens OX=9606 GN=UTP15 PE=1 SV=3 - [UTP15_HUMAN]	6.37	2	3	3	3	47.8514	6.37	3	3	518	58.3786	9.11475
B4DZY9	cDNA FLJ59103, highly similar to T-complex protein 1 subunit epsilon OS=Homo sapiens OX=9606 PE=2 SV=1 - [B4DZY9_HUMAN]	6.36	14	2	2	2	39.25	6.36	2	2	283	32.0308	8.49951
B7Z2D8	cDNA FLJ55473, highly similar to G-rich sequence factor 1 OS=Homo sapiens OX=9606 PE=2 SV=1 - [B7Z2D8_HUMAN]	6.35	11	2	2	2	33.52	6.35	2	2	362	41.5476	5.21143
Q9Y6M1	Insulin-like growth factor 2 mRNA-binding protein 2 OS=Homo sapiens OX=9606 GN=IGF2BP2 PE=1 SV=2 - [IF2B2_HUMAN]	6.34	3	2	3	3	68.4933	6.34	3	3	599	66.0806	8.45557
Q9NWU5	39S ribosomal protein L22, mitochondrial OS=Homo sapiens OX=9606 GN=MRPL22 PE=1 SV=1 - [RM22_HUMAN]	6.31	3	1	1	1	21.06	6.31	1	1	206	23.6256	9.93506
B4DU83	cDNA FLJ54157, highly similar to Chaperone-activity of bc1 complex-like, mitochondrial OS=Homo sapiens OX=9606 PE=2 SV=1 - [B4DU83_HUMAN]	6.23	7	2	2	2	59.0784	6.23	2	2	321	37.1005	5.43994
C9JXG8	Ran-specific GTPase-activating protein (Fragment) OS=Homo sapiens OX=9606 GN=RANBP1 PE=1 SV=2 - [C9JXG8_HUMAN]	6.21	6	1	1	1	35.91	6.21	1	1	145	16.8897	8.52881
B3KM81	cDNA FLJ10471 fis, clone NT2RP2000045, highly similar to DnaJ homolog subfamily A member 3, mitochondrial OS=Homo sapiens OX=9606 PE=2 SV=1 - [B3KM81_HUMAN]	6.18	3	2	2	2	23.98	6.18	2	2	453	49.5521	9.34912
B3KRM2	Serine/threonine-protein phosphatase OS=Homo sapiens OX=9606 PE=2 SV=1 - [B3KRM2_HUMAN]	6.15	10	2	2	2	53.02	6.15	2	2	309	35.5363	5.42725
B1AHA9	DNA replication licensing factor MCM5 (Fragment) OS=Homo sapiens OX=9606 GN=MCM5 PE=1 SV=8 - [B1AHA9_HUMAN]	6.09	4	1	1	1	22.82	6.09	1	1	230	25.827	6.23975
O60884	DnaJ homolog subfamily A member 2 OS=Homo sapiens OX=9606 GN=DNAJA2 PE=1 SV=1 - [DNJA2_HUMAN]	6.07	2	2	2	2	37.68	6.07	2	2	412	45.7166	6.48096
B4DJT7	cDNA FLJ56511, highly similar to Neurofilament triplet M protein OS=Homo sapiens OX=9606 PE=2 SV=1 - [B4DJT7_HUMAN]	6.02	15	3	4	4	42.19	6.02	4	4	698	78.8381	4.77979
Q15397	Pumilio homolog 3 OS=Homo sapiens OX=9606 GN=PUM3 PE=1 SV=3 - [PUM3_HUMAN]	6.02	7	4	4	4	56.4153	6.02	4	4	648	73.5383	9.64209
Q8IY81	pre-rRNA 2'-O-ribose RNA methyltransferase FTSJ3 OS=Homo sapiens OX=9606 GN=FTSJ3 PE=1 SV=2 - [SPB1_HUMAN]	6.02	3	4	4	4	108.99	6.02	4	4	847	96.4992	8.39697
B4E1E0	CTP synthase OS=Homo sapiens OX=9606 GN=CTPS1 PE=1 SV=1 - [B4E1E0_HUMAN]	5.98	8	2	2	2	26.62	5.98	2	2	435	49.6632	7.51807
P26641	Elongation factor 1-gamma OS=Homo sapiens OX=9606 GN=EEF1G PE=1 SV=3 - [EF1G_HUMAN]	5.95	5	2	2	2	59.8	5.95	2	2	437	50.0871	6.66846
Q9Y5M8	Signal recognition particle receptor subunit beta OS=Homo sapiens OX=9606 GN=SRPRB PE=1 SV=3 - [SRPRB_HUMAN]	5.9	1	1	1	1	0	5.9	1	1	271	29.6838	9.0415
E9PNG3	Cold shock domain-containing protein E1 (Fragment) OS=Homo sapiens OX=9606 GN=CSDE1 PE=1 SV=8 - [E9PNG3_HUMAN]	5.88	6	1	1	1	34.89	5.88	1	1	136	15.3557	4.88135
B4DXN3	cDNA FLJ57657, highly similar to Charged multivesicular body protein 1a OS=Homo sapiens OX=9606 PE=2 SV=1 - [B4DXN3_HUMAN]	5.84	4	1	1	1	35.8	5.84	1	1	137	15.291	9.53955
B9A008	U3 small nucleolar ribonucleoprotein protein IMP4 (Fragment) OS=Homo sapiens OX=9606 GN=IMP4 PE=1 SV=1 - [B9A008_HUMAN]	5.81	4	1	1	1	20.13	5.81	1	1	172	19.6062	9.70068
P46087	Probable 28S rRNA (cytosine(4447)-C(5))-methyltransferase OS=Homo sapiens OX=9606 GN=NOP2 PE=1 SV=2 - [NOP2_HUMAN]	5.79	3	4	4	4	69.9483	5.79	4	4	812	89.2471	9.23193
A4D1M6	HCG19809 OS=Homo sapiens OX=9606 GN=LOC392793 PE=3 SV=1 - [A4D1M6_HUMAN]	5.78	2	1	1	1	22.65	5.78	1	1	225	24.8754	4.81787
A0A024R1X8	Junction plakoglobin, isoform CRA_a OS=Homo sapiens OX=9606 GN=JUP PE=4 SV=1 - [A0A024R1X8_HUMAN]	5.77	21	3	3	3	44.6567	5.77	3	3	745	81.6748	6.13818
Q8NAV1	Pre-mRNA-splicing factor 38A OS=Homo sapiens OX=9606 GN=PRPF38A PE=1 SV=1 - [PR38A_HUMAN]	5.77	1	2	2	2	25.94	5.77	2	2	312	37.4534	9.96436
H7C446	Suppressor of SWI4 1 homolog (Fragment) OS=Homo sapiens OX=9606 GN=PPAN PE=1 SV=1 - [H7C446_HUMAN]	5.77	5	1	1	1	64.69	5.77	1	1	208	23.2043	10.8433
A0A0S2Z567	RNA binding motif protein 14 isoform 2 OS=Homo sapiens OX=9606 GN=RBM14 PE=2 SV=1 - [A0A0S2Z567_HUMAN]	5.77	2	1	1	1	0	5.77	1	1	156	17.1058	8.63135
P45973	Chromobox protein homolog 5 OS=Homo sapiens OX=9606 GN=CBX5 PE=1 SV=1 - [CBX5_HUMAN]	5.76	1	1	1	1	43.57	5.76	1	1	191	22.2111	5.85889
P62330	ADP-ribosylation factor 6 OS=Homo sapiens OX=9606 GN=ARF6 PE=1 SV=2 - [ARF6_HUMAN]	5.71	5	1	1	1	47.25	5.71	1	1	175	20.0694	8.95361
P24941	Cyclin-dependent kinase 2 OS=Homo sapiens OX=9606 GN=CDK2 PE=1 SV=2 - [CDK2_HUMAN]	5.7	137	1	2	2	31.97	5.7	2	2	298	33.908	8.67529
G3V5S1	L-2-hydroxyglutarate dehydrogenase, mitochondrial OS=Homo sapiens OX=9606 GN=L2HGDH PE=1 SV=1 - [G3V5S1_HUMAN]	5.69	5	1	1	1	43.35	5.69	1	1	211	22.4967	9.0415
A4FU77	SNRNP200 protein (Fragment) OS=Homo sapiens OX=9606 GN=SNRNP200 PE=2 SV=1 - [A4FU77_HUMAN]	5.67	9	8	8	8	115.759	5.67	8	8	1887	216.046	6.48096
B4DHZ2	cDNA FLJ57985, moderately similar to mRNA turnover protein 4 homolog OS=Homo sapiens OX=9606 PE=2 SV=1 - [B4DHZ2_HUMAN]	5.52	2	1	1	1	0	5.52	1	1	145	16.4748	10.2573
O14958	Calsequestrin-2 OS=Homo sapiens OX=9606 GN=CASQ2 PE=1 SV=2 - [CASQ2_HUMAN]	5.51	2	2	2	3	34.31	5.51	2	3	399	46.4068	4.37354
Q15061	WD repeat-containing protein 43 OS=Homo sapiens OX=9606 GN=WDR43 PE=1 SV=3 - [WDR43_HUMAN]	5.47	3	4	4	5	108.7	5.47	4	5	677	74.8434	5.56689
B5MCF9	Pescadillo homolog OS=Homo sapiens OX=9606 GN=PES1 PE=1 SV=1 - [B5MCF9_HUMAN]	5.43	5	3	3	3	48.88	5.43	3	3	571	66.036	7.50342
A8K6V3	cDNA FLJ78677, highly similar to Homo sapiens splicing factor 3b, subunit 3, 130kDa (SF3B3), mRNA OS=Homo sapiens OX=9606 PE=2 SV=1 - [A8K6V3_HUMAN]	5.42	6	5	5	5	48.9	5.42	5	5	1217	135.493	5.21143
B3KUZ8	Aspartate aminotransferase OS=Homo sapiens OX=9606 PE=2 SV=1 - [B3KUZ8_HUMAN]	5.39	3	1	1	1	45.74	5.39	1	1	371	41.3001	8.83643
A4UJ43	Glutathione S-transferase OS=Homo sapiens OX=9606 GN=GSTM3 PE=2 SV=1 - [A4UJ43_HUMAN]	5.24	4	1	1	1	26.83	5.24	1	1	210	24.8023	5.23682
Q05CW7	NAT10 protein (Fragment) OS=Homo sapiens OX=9606 GN=NAT10 PE=2 SV=1 - [Q05CW7_HUMAN]	5.23	3	1	3	3	43.57	5.23	3	3	554	62.345	9.26123
A0A0F7L0Q8	Fragile X mental retardation autosomal homolog variant p5FK OS=Homo sapiens OX=9606 GN=FXR1 PE=2 SV=1 - [A0A0F7L0Q8_HUMAN]	5.21	18	2	3	3	56.1595	5.21	3	3	595	67.2296	7.28369
Q86TW7	Dihydrolipoamide acetyltransferase component of pyruvate dehydrogenase complex (Fragment) OS=Homo sapiens OX=9606 GN=DLST PE=2 SV=1 - [Q86TW7_HUMAN]	5.18	4	1	1	1	47.77	5.18	1	1	251	26.8682	10.0815
A0A0D9SFE5	Lamin B1, isoform CRA_a OS=Homo sapiens OX=9606 GN=LMNB1 PE=1 SV=1 - [A0A0D9SFE5_HUMAN]	5.17	5	2	2	2	54.54	5.17	2	2	329	37.5583	5.33838
P23258	Tubulin gamma-1 chain OS=Homo sapiens OX=9606 GN=TUBG1 PE=1 SV=2 - [TBG1_HUMAN]	5.1	5	2	2	2	55.36	5.1	2	2	451	51.1378	6.13818
P11055	Myosin-3 OS=Homo sapiens OX=9606 GN=MYH3 PE=1 SV=3 - [MYH3_HUMAN]	5.1	8	1	8	11	195.938	5.1	8	11	1940	223.766	5.80811
J3QQM1	26S proteasome regulatory subunit 8 (Fragment) OS=Homo sapiens OX=9606 GN=PSMC5 PE=1 SV=1 - [J3QQM1_HUMAN]	4.94	3	1	1	1	42.98	4.94	1	1	263	29.3284	6.17627
A0A087WYV5	Slit homolog 2 protein OS=Homo sapiens OX=9606 GN=SLIT2 PE=1 SV=1 - [A0A087WYV5_HUMAN]	4.93	7	6	6	6	111.78	4.93	6	6	1439	159.876	6.82959
B7Z792	cDNA FLJ53932, highly similar to NADH-ubiquinone oxidoreductase 49 kDa subunit, mitochondrial OS=Homo sapiens OX=9606 PE=2 SV=1 - [B7Z792_HUMAN]	4.93	4	2	2	2	50.6854	4.93	2	2	406	46.3666	7.34229
Q9NSM5	Uncharacterized protein DKFZp564A2282 (Fragment) OS=Homo sapiens OX=9606 GN=DKFZp564A2282 PE=2 SV=2 - [Q9NSM5_HUMAN]	4.91	5	2	2	2	43.89	4.91	2	2	632	70.1449	4.85596
L0R875	Alternative protein IDH3B OS=Homo sapiens OX=9606 GN=IDH3B PE=4 SV=1 - [L0R875_HUMAN]	4.9	4	1	1	1	46.78	4.9	1	1	204	22.4405	6.15088
E9PLG2	26S proteasome regulatory subunit 6A (Fragment) OS=Homo sapiens OX=9606 GN=PSMC3 PE=1 SV=3 - [E9PLG2_HUMAN]	4.89	8	1	1	1	21.67	4.89	1	1	184	20.4747	5.07178
Q8NHX6	DNA helicase OS=Homo sapiens OX=9606 GN=HCC5 PE=2 SV=1 - [Q8NHX6_HUMAN]	4.88	9	3	3	3	89.0367	4.88	3	3	676	75.7396	6.46826
Q9H072	Uncharacterized protein DKFZp586J151 OS=Homo sapiens OX=9606 GN=DKFZp586J151 PE=2 SV=1 - [Q9H072_HUMAN]	4.88	2	2	2	2	37.61	4.88	2	2	533	58.0592	8.6167
C9JIJ6	Glutaminase kidney isoform, mitochondrial (Fragment) OS=Homo sapiens OX=9606 GN=GLS PE=1 SV=1 - [C9JIJ6_HUMAN]	4.88	8	1	1	1	35.02	4.88	1	1	164	17.9388	8.11865
B3KM65	cDNA FLJ10383 fis, clone NT2RM2002100, highly similar to Probable ATP-dependent RNA helicase DDX52 OS=Homo sapiens OX=9606 PE=2 SV=1 - [B3KM65_HUMAN]	4.84	3	1	1	1	21.48	4.84	1	1	413	46.1099	9.67139
A8K330	cDNA FLJ77055, highly similar to Homo sapiens WD repeat domain 75 (WDR75), mRNA (Fragment) OS=Homo sapiens OX=9606 PE=2 SV=1 - [A8K330_HUMAN]	4.8	2	3	3	3	44.7581	4.8	3	3	812	92.1912	5.8208
Q96EL2	28S ribosomal protein S24, mitochondrial OS=Homo sapiens OX=9606 GN=MRPS24 PE=1 SV=1 - [RT24_HUMAN]	4.79	1	1	1	1	0	4.79	1	1	167	19.0029	9.37842
Q9NW64	Pre-mRNA-splicing factor RBM22 OS=Homo sapiens OX=9606 GN=RBM22 PE=1 SV=1 - [RBM22_HUMAN]	4.76	1	2	2	2	64.9447	4.76	2	2	420	46.8654	8.54346
H0YD97	Pyruvate dehydrogenase protein X component, mitochondrial (Fragment) OS=Homo sapiens OX=9606 GN=PDHX PE=1 SV=1 - [H0YD97_HUMAN]	4.76	3	1	1	1	28.5	4.76	1	1	189	20.6599	7.34229
B4DZC0	cDNA FLJ51771, highly similar to SWI/SNF-related matrix-associatedactin-dependent regulator of chromatin subfamily A member5 OS=Homo sapiens OX=9606 PE=2 SV=1 - [B4DZC0_HUMAN]	4.72	9	5	5	5	59.8	4.72	5	5	995	116.683	8.33838
Q5T3Q7	HEAT repeat-containing protein 1 OS=Homo sapiens OX=9606 GN=HEATR1 PE=1 SV=1 - [Q5T3Q7_HUMAN]	4.7	10	8	8	8	171.577	4.7	8	8	2063	233.127	6.59521
P78527	DNA-dependent protein kinase catalytic subunit OS=Homo sapiens OX=9606 GN=PRKDC PE=1 SV=3 - [PRKDC_HUMAN]	4.68	3	16	16	16	244.32	4.68	16	16	4128	468.788	7.12256
Q96A35	39S ribosomal protein L24, mitochondrial OS=Homo sapiens OX=9606 GN=MRPL24 PE=1 SV=1 - [RM24_HUMAN]	4.63	1	1	1	1	28.03	4.63	1	1	216	24.899	9.29053
Q59GC1	Fragile X mental retardation 1 variant (Fragment) OS=Homo sapiens OX=9606 PE=2 SV=1 - [Q59GC1_HUMAN]	4.55	18	2	3	3	74.3427	4.55	3	3	527	59.118	8.646
H9E7B8	Cytochrome c oxidase subunit 2 (Fragment) OS=Homo sapiens OX=9606 GN=COX2 PE=3 SV=1 - [H9E7B8_HUMAN]	4.55	376	1	1	2	0	4.55	1	2	220	24.8368	4.729
H0YD73	26S proteasome non-ATPase regulatory subunit 13 (Fragment) OS=Homo sapiens OX=9606 GN=PSMD13 PE=1 SV=1 - [H0YD73_HUMAN]	4.52	10	1	1	1	0	4.52	1	1	221	25.0698	5.32568
F5GY37	Prohibitin-2 OS=Homo sapiens OX=9606 GN=PHB2 PE=1 SV=1 - [F5GY37_HUMAN]	4.49	3	1	1	1	23.44	4.49	1	1	267	29.705	9.87646
A0A286YFA2	D-3-phosphoglycerate dehydrogenase OS=Homo sapiens OX=9606 GN=PHGDH PE=1 SV=1 - [A0A286YFA2_HUMAN]	4.49	19	2	2	2	55.77	4.49	2	2	445	47.5735	5.89697
A0A384N647	Adenylate kinase 4, mitochondrial OS=Homo sapiens OX=9606 GN=AK4 PE=2 SV=1 - [A0A384N647_HUMAN]	4.48	2	1	1	1	50.6	4.48	1	1	223	25.2362	8.55811
A0A075B7D9	TATA-binding protein-associated factor 2N OS=Homo sapiens OX=9606 GN=TAF15 PE=1 SV=1 - [A0A075B7D9_HUMAN]	4.45	13	2	2	2	45.28	4.45	2	2	449	48.8094	5.08447
H0YLN9	RNA helicase aquarius (Fragment) OS=Homo sapiens OX=9606 GN=AQR PE=1 SV=1 - [H0YLN9_HUMAN]	4.44	5	1	1	1	32.01	4.44	1	1	180	21.04	8.07471
E9PCY5	DNA topoisomerase 2 (Fragment) OS=Homo sapiens OX=9606 GN=TOP2B PE=1 SV=1 - [E9PCY5_HUMAN]	4.43	6	1	4	4	74.6367	4.43	4	4	1150	130.398	8.47021
P16615	Sarcoplasmic/endoplasmic reticulum calcium ATPase 2 OS=Homo sapiens OX=9606 GN=ATP2A2 PE=1 SV=1 - [AT2A2_HUMAN]	4.41	10	2	2	3	51.32	4.41	2	2	1042	114.683	5.33838
Q9Y3A2	Probable U3 small nucleolar RNA-associated protein 11 OS=Homo sapiens OX=9606 GN=UTP11 PE=1 SV=2 - [UTP11_HUMAN]	4.35	1	1	1	1	22.81	4.35	1	1	253	30.4277	10.1548
Q9NWT1	p21-activated protein kinase-interacting protein 1 OS=Homo sapiens OX=9606 GN=PAK1IP1 PE=1 SV=2 - [PK1IP_HUMAN]	4.34	1	2	2	2	52.2465	4.34	2	2	392	43.9359	8.90967
A0A0J9YXV4	U3 small nucleolar RNA-associated protein 4 homolog (Fragment) OS=Homo sapiens OX=9606 GN=UTP4 PE=1 SV=1 - [A0A0J9YXV4_HUMAN]	4.29	4	1	1	1	27.96	4.29	1	1	396	44.5271	9.0415
P11021	Endoplasmic reticulum chaperone BiP OS=Homo sapiens OX=9606 GN=HSPA5 PE=1 SV=2 - [BIP_HUMAN]	4.28	9	1	2	3	74.98	4.28	2	3	654	72.2884	5.16064
S4R349	Nucleolar and coiled-body phosphoprotein 1 (Fragment) OS=Homo sapiens OX=9606 GN=NOLC1 PE=1 SV=1 - [S4R349_HUMAN]	4.26	5	1	1	1	0	4.26	1	1	258	26.7397	9.45166
Q9H0A0	RNA cytidine acetyltransferase OS=Homo sapiens OX=9606 GN=NAT10 PE=1 SV=2 - [NAT10_HUMAN]	4.2	4	1	3	3	56.7	4.2	3	3	1025	115.657	8.26514
Q9NVC0	cDNA FLJ10820 fis, clone NT2RP4001041, weakly similar to PROBABLE LEUCYL-TRNA SYNTHETASE OS=Homo sapiens OX=9606 PE=2 SV=1 - [Q9NVC0_HUMAN]	4.13	8	1	1	1	25.9	4.13	1	1	242	27.585	7.21045
Q5JSD2	Voltage-dependent anion-selective channel protein 2 (Fragment) OS=Homo sapiens OX=9606 GN=VDAC2 PE=1 SV=8 - [Q5JSD2_HUMAN]	4.12	6	1	1	1	29.38	4.12	1	1	194	21.1812	7.92822
B2RA72	cDNA, FLJ94734, Homo sapiens CHMP1.5 protein (CHMP1.5), mRNA OS=Homo sapiens OX=9606 PE=2 SV=1 - [B2RA72_HUMAN]	4.08	2	1	1	1	0	4.08	1	1	196	21.7631	8.104
Q6P2Q9	Pre-mRNA-processing-splicing factor 8 OS=Homo sapiens OX=9606 GN=PRPF8 PE=1 SV=2 - [PRP8_HUMAN]	4.07	7	9	9	9	152.145	4.07	9	9	2335	273.427	8.83643
Q5HYC5	Uncharacterized protein DKFZp686L08115 (Fragment) OS=Homo sapiens OX=9606 GN=DKFZp686L08115 PE=4 SV=1 - [Q5HYC5_HUMAN]	4.03	6	1	1	1	0	4.03	1	1	248	27.551	9.53955
C9J7P5	FAST kinase domain-containing protein 4 (Fragment) OS=Homo sapiens OX=9606 GN=TBRG4 PE=1 SV=1 - [C9J7P5_HUMAN]	4.03	6	1	1	1	32.51	4.03	1	1	248	28.362	7.00537
Q7Z759	CCT8 protein OS=Homo sapiens OX=9606 GN=CCT8 PE=2 SV=1 - [Q7Z759_HUMAN]	4.02	4	2	2	2	57.24	4.02	2	2	497	54.0717	5.31299
A2I829	NF-kappaB repressing factor (Fragment) OS=Homo sapiens OX=9606 GN=NKRF PE=2 SV=1 - [A2I829_HUMAN]	4.01	4	2	2	2	51.05	4.01	2	2	599	67.4082	8.86572
O43818	U3 small nucleolar RNA-interacting protein 2 OS=Homo sapiens OX=9606 GN=RRP9 PE=1 SV=1 - [U3IP2_HUMAN]	4	1	2	2	2	69.326	4	2	2	475	51.8085	7.85498
O00425	Insulin-like growth factor 2 mRNA-binding protein 3 OS=Homo sapiens OX=9606 GN=IGF2BP3 PE=1 SV=2 - [IF2B3_HUMAN]	3.97	1	1	2	2	46.95	3.97	2	2	579	63.6656	8.86572
U3KQ48	U3 small nucleolar ribonucleoprotein protein MPP10 OS=Homo sapiens OX=9606 GN=MPHOSPH10 PE=1 SV=1 - [U3KQ48_HUMAN]	3.9	3	1	1	1	38.85	3.9	1	1	462	53.5208	4.4624
H7C4G8	5'-nucleotidase domain-containing protein 2 (Fragment) OS=Homo sapiens OX=9606 GN=NT5DC2 PE=1 SV=1 - [H7C4G8_HUMAN]	3.88	2	1	1	1	33.91	3.88	1	1	258	30.0923	5.96045
Q9Y623	Myosin-4 OS=Homo sapiens OX=9606 GN=MYH4 PE=2 SV=2 - [MYH4_HUMAN]	3.82	8	1	7	8	190.185	3.82	7	8	1939	222.932	5.84619
Q8TBT6	Uncharacterized protein (Fragment) OS=Homo sapiens OX=9606 PE=2 SV=1 - [Q8TBT6_HUMAN]	3.81	2	1	1	1	22.62	3.81	1	1	315	34.4675	8.86572
C9JXK0	Delta(14)-sterol reductase (Fragment) OS=Homo sapiens OX=9606 GN=LBR PE=1 SV=1 - [C9JXK0_HUMAN]	3.76	3	1	1	1	33.38	3.76	1	1	213	24.2696	9.86182
A0A024R652	Methylenetetrahydrofolate dehydrogenase (NADP+ dependent) 1, methenyltetrahydrofolate cyclohydrolase, formyltetrahydrofolate synthetase, isoform CRA_a OS=Homo sapiens OX=9606 GN=MTHFD1 PE=3 SV=1 - [A0A024R652_HUMAN]	3.74	5	3	3	3	58.1633	3.74	3	3	935	101.467	7.18115
B3KSD5	cDNA FLJ36048 fis, clone TESTI2017954, highly similar to Homo sapiens outer dense fiber of sperm tails 2 (ODF2), transcript variant 2, mRNA OS=Homo sapiens OX=9606 PE=2 SV=1 - [B3KSD5_HUMAN]	3.72	8	2	2	2	47.59	3.72	2	2	538	62.7223	6.30322
A0A0A0MTB8	WD repeat-containing protein 36 OS=Homo sapiens OX=9606 GN=WDR36 PE=1 SV=1 - [A0A0A0MTB8_HUMAN]	3.69	2	3	3	3	49.0067	3.69	3	3	895	99.3031	7.35693
P09496	Clathrin light chain A OS=Homo sapiens OX=9606 GN=CLTA PE=1 SV=1 - [CLCA_HUMAN]	3.63	2	1	1	1	0	3.63	1	1	248	27.06	4.51318
Q5H919	HIV Tat-specific factor 1 (Fragment) OS=Homo sapiens OX=9606 GN=HTATSF1 PE=1 SV=1 - [Q5H919_HUMAN]	3.59	4	1	1	1	38.33	3.59	1	1	223	25.1691	4.65283
Q8TAA5	GrpE protein homolog 2, mitochondrial OS=Homo sapiens OX=9606 GN=GRPEL2 PE=1 SV=1 - [GRPE2_HUMAN]	3.56	2	1	1	1	35.12	3.56	1	1	225	25.4154	7.72314
A0A384MTJ7	Epididymis secretory sperm binding protein OS=Homo sapiens OX=9606 PE=2 SV=1 - [A0A384MTJ7_HUMAN]	3.48	16	1	2	2	60.7217	3.48	2	2	517	57.2132	6.99072
H0YAG8	Alcohol dehydrogenase class-3 (Fragment) OS=Homo sapiens OX=9606 GN=ADH5 PE=1 SV=1 - [H0YAG8_HUMAN]	3.44	5	1	1	1	25.2	3.44	1	1	262	27.529	6.20166
Q9H9Y2	Ribosome production factor 1 OS=Homo sapiens OX=9606 GN=RPF1 PE=1 SV=2 - [RPF1_HUMAN]	3.44	1	1	1	1	37.07	3.44	1	1	349	40.0861	10.0083
M0R0Y3	RuvB-like helicase OS=Homo sapiens OX=9606 GN=RUVBL2 PE=1 SV=1 - [M0R0Y3_HUMAN]	3.39	3	1	1	1	23.9	3.39	1	1	354	38.7312	7.97217
C9JAM8	Plastin-1 (Fragment) OS=Homo sapiens OX=9606 GN=PLS1 PE=1 SV=1 - [C9JAM8_HUMAN]	3.38	11	1	1	1	38.59	3.38	1	1	266	29.4453	5.21143
Q9BSH4	Translational activator of cytochrome c oxidase 1 OS=Homo sapiens OX=9606 GN=TACO1 PE=1 SV=1 - [TACO1_HUMAN]	3.37	1	1	1	1	34.59	3.37	1	1	297	32.4567	8.1333
A0A0U1RQF0	Fatty acid synthase OS=Homo sapiens OX=9606 GN=FASN PE=1 SV=1 - [A0A0U1RQF0_HUMAN]	3.31	2	6	6	6	111.239	3.31	6	6	2509	273.026	6.46826
O14654	Insulin receptor substrate 4 OS=Homo sapiens OX=9606 GN=IRS4 PE=1 SV=1 - [IRS4_HUMAN]	3.26	1	4	4	4	56.52	3.26	4	4	1257	133.685	8.44092
Q7Z3K9	Uncharacterized protein DKFZp781L0540 (Fragment) OS=Homo sapiens OX=9606 GN=DKFZp781L0540 PE=2 SV=1 - [Q7Z3K9_HUMAN]	3.25	7	2	2	2	25.07	3.25	2	2	799	89.9667	5.64307
Q9Y4W2	Ribosomal biogenesis protein LAS1L OS=Homo sapiens OX=9606 GN=LAS1L PE=1 SV=2 - [LAS1L_HUMAN]	3.13	3	2	2	2	49.7403	3.13	2	2	734	83.0128	4.729
Q5T749	Keratinocyte proline-rich protein OS=Homo sapiens OX=9606 GN=KPRP PE=1 SV=1 - [KPRP_HUMAN]	3.11	1	2	2	2	30.99	3.11	2	2	579	64.0932	8.26514
H0YHS6	Tyrosine--tRNA ligase (Fragment) OS=Homo sapiens OX=9606 GN=YARS2 PE=1 SV=1 - [H0YHS6_HUMAN]	3.09	2	1	1	1	62.48	3.09	1	1	291	32.1645	8.39697
B4DHP5	cDNA FLJ51847, highly similar to Heat shock 70 kDa protein 6 OS=Homo sapiens OX=9606 PE=2 SV=1 - [B4DHP5_HUMAN]	3.07	20	1	2	2	73.0432	3.07	2	2	619	68.3539	6.13818
Q8TDG2	Actin-related protein T1 OS=Homo sapiens OX=9606 GN=ACTRT1 PE=2 SV=2 - [ACTT1_HUMAN]	2.93	1	1	1	1	0	2.93	1	1	376	41.6692	6.78564
O75369	Filamin-B OS=Homo sapiens OX=9606 GN=FLNB PE=1 SV=2 - [FLNB_HUMAN]	2.88	12	5	8	8	152.071	2.88	8	8	2602	277.99	5.73193
D6R9I9	ATP-binding cassette sub-family E member 1 OS=Homo sapiens OX=9606 GN=ABCE1 PE=1 SV=1 - [D6R9I9_HUMAN]	2.85	2	1	1	1	21.48	2.85	1	1	421	47.0064	8.30908
A0A2U3TZL8	Kinesin-like protein OS=Homo sapiens OX=9606 GN=KIF23 PE=1 SV=1 - [A0A2U3TZL8_HUMAN]	2.84	3	2	2	3	89.8322	2.84	2	3	810	92.6247	7.95752
B2R9R2	cDNA, FLJ94517, highly similar to Homo sapiens baculoviral IAP repeat-containing 4 (BIRC4), mRNA OS=Homo sapiens OX=9606 PE=2 SV=1 - [B2R9R2_HUMAN]	2.82	2	1	1	1	0	2.82	1	1	497	56.5874	6.65381
E9PK47	Alpha-1,4 glucan phosphorylase OS=Homo sapiens OX=9606 GN=PYGL PE=1 SV=1 - [E9PK47_HUMAN]	2.81	11	2	2	2	0	2.81	2	2	819	94.0106	7.31299
A0A0A0MS07	Immunoglobulin heavy constant gamma 1 (Fragment) OS=Homo sapiens OX=9606 GN=IGHG1 PE=1 SV=1 - [A0A0A0MS07_HUMAN]	2.71	24	1	1	1	32.58	2.71	1	1	295	31.963	8.03076
Q9H8H0	Nucleolar protein 11 OS=Homo sapiens OX=9606 GN=NOL11 PE=1 SV=1 - [NOL11_HUMAN]	2.64	3	2	2	2	45.57	2.64	2	2	719	81.0719	6.07471
Q5JTZ9	Alanine--tRNA ligase, mitochondrial OS=Homo sapiens OX=9606 GN=AARS2 PE=1 SV=1 - [SYAM_HUMAN]	2.64	1	2	2	2	98.1473	2.64	2	2	985	107.273	6.26514
Q1RMG2	Adenosylhomocysteinase OS=Homo sapiens OX=9606 GN=AHCY PE=2 SV=1 - [Q1RMG2_HUMAN]	2.61	2	1	1	1	35.94	2.61	1	1	306	33.7892	6.60986
Q5VU21	PAI-1 mRNA-binding protein variant OS=Homo sapiens OX=9606 PE=2 SV=1 - [Q5VU21_HUMAN]	2.58	5	1	1	1	20.06	2.58	1	1	387	42.4013	8.44092
B3KMR5	cDNA FLJ12434 fis, clone NT2RM1000037, highly similar to Homo sapiens KIAA0690 protein OS=Homo sapiens OX=9606 PE=2 SV=1 - [B3KMR5_HUMAN]	2.54	3	3	3	3	28.1	2.54	3	3	1297	143.581	8.74854
C9IZ01	Elongation factor G, mitochondrial OS=Homo sapiens OX=9606 GN=GFM1 PE=1 SV=1 - [C9IZ01_HUMAN]	2.54	3	1	1	1	29.1	2.54	1	1	591	65.9928	8.06006
B4DEB2	cDNA FLJ56491, highly similar to DNA-repair protein XRCC1 OS=Homo sapiens OX=9606 PE=2 SV=1 - [B4DEB2_HUMAN]	2.5	5	1	1	1	35.43	2.5	1	1	400	43.1943	9.51025
O94906	Pre-mRNA-processing factor 6 OS=Homo sapiens OX=9606 GN=PRPF6 PE=1 SV=1 - [PRP6_HUMAN]	2.44	1	2	2	2	71	2.44	2	2	941	106.858	8.25049
B4DNL1	cDNA FLJ51512, highly similar to Periodic tryptophan protein 1 homolog OS=Homo sapiens OX=9606 PE=2 SV=1 - [B4DNL1_HUMAN]	2.43	5	1	1	1	26.9	2.43	1	1	412	45.7837	5.52881
D6W539	Hydroxyacyl-Coenzyme A dehydrogenase/3-ketoacyl-Coenzyme A thiolase/enoyl-Coenzyme A hydratase (Trifunctional protein), beta subunit, isoform CRA_b OS=Homo sapiens OX=9606 GN=HADHB PE=4 SV=1 - [D6W539_HUMAN]	2.42	5	1	1	1	59.7	2.42	1	1	372	40.3882	9.78857
Q59EC6	Ret finger protein isoform beta variant (Fragment) OS=Homo sapiens OX=9606 PE=2 SV=1 - [Q59EC6_HUMAN]	2.36	2	1	1	1	0	2.36	1	1	382	43.3549	8.1626
Q08J23	tRNA (cytosine(34)-C(5))-methyltransferase OS=Homo sapiens OX=9606 GN=NSUN2 PE=1 SV=2 - [NSUN2_HUMAN]	2.35	1	2	2	2	38.7	2.35	2	2	767	86.4158	6.771
Q96GC8	NOP14 protein (Fragment) OS=Homo sapiens OX=9606 GN=NOP14 PE=2 SV=2 - [Q96GC8_HUMAN]	2.35	4	1	1	1	43.15	2.35	1	1	468	53.0838	4.94482
B2R5U7	cDNA, FLJ92633, highly similar to Homo sapiens CCAAT-box-binding transcription factor (CBF2), mRNA OS=Homo sapiens OX=9606 PE=2 SV=1 - [B2R5U7_HUMAN]	2.3	2	2	2	2	47.12	2.3	2	2	998	114.128	5.36377
B4DY32	cDNA FLJ51387, highly similar to Asparagine synthetase (glutamine-hydrolyzing) OS=Homo sapiens OX=9606 PE=2 SV=1 - [B4DY32_HUMAN]	2.3	2	1	1	1	37.61	2.3	1	1	478	54.827	6.40479
Q60FE6	Filamin A OS=Homo sapiens OX=9606 GN=FLNA PE=2 SV=1 - [Q60FE6_HUMAN]	2.26	15	3	6	6	147.341	2.26	6	6	2612	277.332	6.04932
B3KWE0	cDNA FLJ42838 fis, clone BRCAN2021028 OS=Homo sapiens OX=9606 PE=2 SV=1 - [B3KWE0_HUMAN]	2.2	2	1	1	1	36.37	2.2	1	1	546	61.9238	8.73389
A0A3S8NFS6	ATIII-T1 OS=Homo sapiens OX=9606 PE=4 SV=1 - [A0A3S8NFS6_HUMAN]	2.17	4	1	1	1	30.08	2.17	1	1	414	47.0729	6.03662
Q8IW76	eIF2AK2 protein (Fragment) OS=Homo sapiens OX=9606 GN=EIF2AK2 PE=2 SV=1 - [Q8IW76_HUMAN]	2.14	3	1	1	1	47.64	2.14	1	1	513	57.5843	8.33838
A0A1B0GV49	Alpha-aminoadipic semialdehyde dehydrogenase OS=Homo sapiens OX=9606 GN=ALDH7A1 PE=1 SV=1 - [A0A1B0GV49_HUMAN]	2.12	9	1	1	1	25.32	2.12	1	1	472	50.9391	7.63525
Q14690	Protein RRP5 homolog OS=Homo sapiens OX=9606 GN=PDCD11 PE=1 SV=3 - [RRP5_HUMAN]	2.08	4	4	4	4	46.56	2.08	4	4	1871	208.57	8.86572
A1JUI8	Chaperonin subunit 6A (Fragment) OS=Homo sapiens OX=9606 GN=CCT6A PE=2 SV=1 - [A1JUI8_HUMAN]	2.05	5	1	1	1	0	2.05	1	1	488	53.6472	6.12549
A0A024RCU9	SFRS protein kinase 1, isoform CRA_e OS=Homo sapiens OX=9606 GN=SRPK1 PE=4 SV=1 - [A0A024RCU9_HUMAN]	2.01	4	1	1	1	34.44	2.01	1	1	548	61.9241	5.69385
A0A0C4DFX7	WD repeat-containing protein 76 OS=Homo sapiens OX=9606 GN=WDR76 PE=1 SV=1 - [A0A0C4DFX7_HUMAN]	1.96	2	1	1	1	21.67	1.96	1	1	562	62.5144	9.1001
B2RMQ4	Cytoskeleton associated protein 2 OS=Homo sapiens OX=9606 GN=CKAP2 PE=2 SV=1 - [B2RMQ4_HUMAN]	1.91	2	1	1	1	41.64	1.91	1	1	682	76.8379	9.40771
Q15374	GARS protein OS=Homo sapiens OX=9606 PE=2 SV=1 - [Q15374_HUMAN]	1.85	4	1	1	1	30.46	1.85	1	1	433	45.9578	6.78564
Q69YP1	Uncharacterized protein DKFZp762M013 (Fragment) OS=Homo sapiens OX=9606 GN=DKFZp762M013 PE=2 SV=1 - [Q69YP1_HUMAN]	1.79	3	1	1	1	47.41	1.79	1	1	728	87.3125	6.87354
A0A024RC67	Protein regulator of cytokinesis 1, isoform CRA_e OS=Homo sapiens OX=9606 GN=PRC1 PE=4 SV=1 - [A0A024RC67_HUMAN]	1.77	2	1	1	1	24.21	1.77	1	1	620	71.6196	6.56592
A0A024RBS1	GCN1 general control of amino-acid synthesis 1-like 1 (Yeast), isoform CRA_b OS=Homo sapiens OX=9606 GN=GCN1L1 PE=4 SV=1 - [A0A024RBS1_HUMAN]	1.77	3	3	3	3	32.85	1.77	3	3	2432	266.706	6.91748
Q96HX3	Dolichyl-diphosphooligosaccharide--protein glycosyltransferase subunit 1 (Fragment) OS=Homo sapiens OX=9606 PE=2 SV=1 - [Q96HX3_HUMAN]	1.76	5	1	1	1	32.58	1.76	1	1	568	64.5417	6.55127
A0A0B4J2E5	Uncharacterized protein OS=Homo sapiens OX=9606 GN=LOC102724159 PE=1 SV=1 - [A0A0B4J2E5_HUMAN]	1.74	2	1	1	1	72.92	1.74	1	1	919	102.386	6.20166
Q59FF5	Myosin Va variant (Fragment) OS=Homo sapiens OX=9606 PE=2 SV=1 - [Q59FF5_HUMAN]	1.7	8	2	2	2	0	1.7	2	2	1409	164.816	9.0415
I3L1L3	Myb-binding protein 1A (Fragment) OS=Homo sapiens OX=9606 GN=MYBBP1A PE=1 SV=1 - [I3L1L3_HUMAN]	1.68	2	2	2	2	53.71	1.68	2	2	1252	140.154	9.26123
E7ESD9	DNA repair protein RAD50 OS=Homo sapiens OX=9606 GN=RAD50 PE=1 SV=1 - [E7ESD9_HUMAN]	1.63	6	1	1	1	26.18	1.63	1	1	551	64.0144	8.22119
A0A1U9X8U3	WDR46 OS=Homo sapiens OX=9606 PE=4 SV=1 - [A0A1U9X8U3_HUMAN]	1.62	9	1	1	1	40.63	1.62	1	1	556	61.6832	9.29053
H3BQZ7	HCG2044799 OS=Homo sapiens OX=9606 GN=HNRNPUL2-BSCL2 PE=4 SV=1 - [H3BQZ7_HUMAN]	1.61	2	1	1	1	0	1.61	1	1	746	84.6392	4.93213
A8K5W7	cDNA FLJ75180, highly similar to Homo sapiens mitochondrial isoleucine tRNA synthetase, mRNA OS=Homo sapiens OX=9606 PE=2 SV=1 - [A8K5W7_HUMAN]	1.6	2	1	1	1	22.05	1.6	1	1	940	105.873	6.41748
Q68DY8	Uncharacterized protein DKFZp686I11137 OS=Homo sapiens OX=9606 GN=DKFZp686I11137 PE=2 SV=1 - [Q68DY8_HUMAN]	1.5	8	1	1	1	0	1.5	1	1	667	73.2843	5.2876
Q14692	Ribosome biogenesis protein BMS1 homolog OS=Homo sapiens OX=9606 GN=BMS1 PE=1 SV=1 - [BMS1_HUMAN]	1.48	1	2	2	2	54.54	1.48	2	2	1282	145.716	6.44287
P35251	Replication factor C subunit 1 OS=Homo sapiens OX=9606 GN=RFC1 PE=1 SV=4 - [RFC1_HUMAN]	1.48	1	1	1	1	0	1.48	1	1	1148	128.175	9.36377
P02774	Vitamin D-binding protein OS=Homo sapiens OX=9606 GN=GC PE=1 SV=2 - [VTDB_HUMAN]	1.48	3	1	1	1	37.59	1.48	1	1	474	52.8829	5.45264
E9PCX7	NAD(P) transhydrogenase, mitochondrial OS=Homo sapiens OX=9606 GN=NNT PE=1 SV=1 - [E9PCX7_HUMAN]	1.47	3	1	1	1	38.82	1.47	1	1	955	99.665	7.02002
Q5HYM2	Uncharacterized protein DKFZp686O2462 (Fragment) OS=Homo sapiens OX=9606 GN=DKFZp686O2462 PE=4 SV=1 - [Q5HYM2_HUMAN]	1.44	3	1	1	1	28.58	1.44	1	1	626	71.9998	5.36377
B9EG90	DNA topoisomerase I OS=Homo sapiens OX=9606 GN=TOP1 PE=2 SV=1 - [B9EG90_HUMAN]	1.31	2	1	1	1	27.72	1.31	1	1	765	90.6429	9.30518
Q59H95	Flightless I homolog variant (Fragment) OS=Homo sapiens OX=9606 PE=2 SV=1 - [Q59H95_HUMAN]	1.27	3	1	1	1	34.76	1.27	1	1	1101	125.198	5.26221
H7C1M2	Protein SON (Fragment) OS=Homo sapiens OX=9606 GN=SON PE=1 SV=1 - [H7C1M2_HUMAN]	1.24	2	1	1	1	0	1.24	1	1	1454	159.92	9.12939
I3L2C7	Gem-associated protein 4 OS=Homo sapiens OX=9606 GN=GEMIN4 PE=1 SV=1 - [I3L2C7_HUMAN]	1.24	5	1	1	1	0	1.24	1	1	1047	118.745	6.18896
A0A0F7G8J1	Plasminogen OS=Homo sapiens OX=9606 GN=PLG PE=2 SV=1 - [A0A0F7G8J1_HUMAN]	1.24	1	1	1	1	52.77	1.24	1	1	809	90.5692	7.35693
Q96SB3	Neurabin-2 OS=Homo sapiens OX=9606 GN=PPP1R9B PE=1 SV=3 - [NEB2_HUMAN]	1.22	1	1	1	1	0	1.22	1	1	817	89.2798	4.97021
B7WP74	Pre-mRNA-splicing factor CWC22 homolog (Fragment) OS=Homo sapiens OX=9606 GN=CWC22 PE=1 SV=1 - [B7WP74_HUMAN]	1.21	2	1	1	1	42.79	1.21	1	1	745	85.5238	5.70654
B4DRA2	cDNA FLJ57828, highly similar to Treacle protein (Fragment) OS=Homo sapiens OX=9606 PE=2 SV=1 - [B4DRA2_HUMAN]	1.08	5	1	1	1	42.31	1.08	1	1	923	93.7135	8.93896
B4DIW2	cDNA FLJ54035, highly similar to Neutral alpha-glucosidase AB OS=Homo sapiens OX=9606 PE=2 SV=1 - [B4DIW2_HUMAN]	1.08	8	1	1	1	32.73	1.08	1	1	830	93.9327	5.87158
B4DSH1	cDNA FLJ51295, highly similar to Cell division cycle 5-like protein OS=Homo sapiens OX=9606 PE=2 SV=1 - [B4DSH1_HUMAN]	1.03	3	1	1	1	24.81	1.03	1	1	775	89.1712	8.54346
B0AZQ4	Structural maintenance of chromosomes protein OS=Homo sapiens OX=9606 PE=2 SV=1 - [B0AZQ4_HUMAN]	0.99	3	1	1	1	57.14	0.99	1	1	1217	141.442	7.18115
Q53SY7	Uncharacterized protein CAD (Fragment) OS=Homo sapiens OX=9606 GN=CAD PE=3 SV=1 - [Q53SY7_HUMAN]	0.93	10	2	2	2	64.97	0.93	2	2	2151	235.029	6.59521
O14578	Citron Rho-interacting kinase OS=Homo sapiens OX=9606 GN=CIT PE=1 SV=2 - [CTRO_HUMAN]	0.69	1	1	1	1	43.2	0.69	1	1	2027	231.286	6.56592
Q6ZMY0	cDNA FLJ16598 fis, clone TESTI4006473, weakly similar to ATP-dependent RNA helicase A OS=Homo sapiens OX=9606 PE=2 SV=1 - [Q6ZMY0_HUMAN]	0.67	2	1	1	1	38.49	0.67	1	1	1340	150.875	8.22119
A0A384P5W4	Epididymis secretory sperm binding protein OS=Homo sapiens OX=9606 PE=2 SV=1 - [A0A384P5W4_HUMAN]	0.67	2	1	1	1	55.12	0.67	1	1	1648	186.349	7.91357
Q00610	Clathrin heavy chain 1 OS=Homo sapiens OX=9606 GN=CLTC PE=1 SV=5 - [CLH1_HUMAN]	0.54	2	1	1	1	45.26	0.54	1	1	1675	191.493	5.69385
P24928	DNA-directed RNA polymerase II subunit RPB1 OS=Homo sapiens OX=9606 GN=POLR2A PE=1 SV=2 - [RPB1_HUMAN]	0.46	1	1	1	1	35.39	0.46	1	1	1970	217.039	7.37158
Q92621	Nuclear pore complex protein Nup205 OS=Homo sapiens OX=9606 GN=NUP205 PE=1 SV=3 - [NU205_HUMAN]	0.45	1	1	1	1	38.24	0.45	1	1	2012	227.776	6.18896
